# Supplementary material for: Kinematic effects of the circle with and without rider in walking horses
Source: PeerJ. 2020 Nov 18;8:e10354. doi: 10.7717/peerj.10354 (PMC7680050; doi:10.7717/peerj.10354)
Supplement: Supplemental Information 1 [file peerj-08-10354-s001.xlsx]

## Sheet: explain
20200628	Agneta Egenvall	model 1 = midline parameter models											Variable name	Variable descriptions
		there has been an attempt to remove unused columns											h1	trial
													wiROMxxxVertT	ROM for withers vertical positon (m)
													exe11	R0- ridden, U0-unridden, gang- unridden walk straight
													exe	RL0- ridden Left lead ; RR0- ridden right lead, ULO-unridden left lead, URO- unridden right lead, gang- straight alley first reprise, gang1-straight alley second reprise
		model 2 = cannon parameter models				maxpitch and minpitch, and their indices have wrong signs							dir	L, R, S
													circle	S-straight, C-circle
													rid	0-unridden, 1-ridden
													rider	5 riders
													horse	14 horses
													fore	inner_fore, outer_fore, straight_fo				the '3 hindlimb' steps as described in manuscript
													SD,sd1	stride duration (s)
													wiMinIndVertT	withers timing at minimum vertical position
	results:	all timing indexes should be subtracted by 1 to derive percentages, either for steps (model 1) or stride data (model 2)											sqrtwiMinIndVertT	squareroot withers timing at minimum vertical position
													wiMaxIndVertT	withers timing at maximum vertical position
													sqrtwiMaxIndVertT	squareroot withers timing at maximum vertical position
													wiMINxxxVertT	withers minimum position (m)
													wiMAXxxxVertT	withers maximum position (m)
													s1ROMxxxVertT	S1 vertical position ROM (m)
													s1MinIndVertT	S1 timing at minimum vertical position
													sqrts1MinIndVertT	squareroot S1 timing at minimum vertical position
	stride duration	stride duration in s					SD, sd1						s1MaxIndVertT	S1 timing at maximum vertical position
													sqs1MaxIndVertT	square S1 timing at maximum vertical position
													s1MINxxxVertT	s1 minimum position (m)
													s1MAXxxxVertT	s1 maximum position (m)
													P	cannon ROM (degree)
													minPitch	maximum protraction, change sign
													maxPitch	maximum retraction, change sign
													MIPitch2	index att maximum protraction, adjust/subtract 1 percentage
													MAPitch2	index att maximum retraction, adjust 1 percentage
													limb	inner_fore, inner_hind, outer_fore, outer_hind
													side	left, right
													limb1	Lfore- left fore etc,Rfore, Lhind, Rhind
													idp	stride serial number

## Sheet: mod1Res
		200227				ur allsetroll
		The SAS System												The SAS System
		The Mixed Procedure												The Mixed Procedure
		Model Information												Model Information
		Data Set	WORK.NEWA											Data Set	WORK.NEWA
		Dependent Variable	wiROMxxxVertT											Dependent Variable	s1ROMxxxVertT
		Covariance Structure	Variance Components											Covariance Structure	Variance Components
		Estimation Method	REML											Estimation Method	REML
		Residual Variance Method	Profile											Residual Variance Method	Profile
		Fixed Effects SE Method	Model-Based											Fixed Effects SE Method	Model-Based
		Degrees of Freedom Method	Containment											Degrees of Freedom Method	Containment
		Class Level Information												Class Level Information
		Class	Levels	Values										Class	Levels	Values
		h1	14	1 2 3 4 5 7 8 9 10 11 12 14 15 17										h1	13	1 2 3 5 7 8 9 10 11 12 14 15 17
		exe	6	RLO RRO ULO URO gang gang1										exe	6	RLO RRO ULO URO gang gang1
		rider	5	1 2 3 4 5										rider	5	1 2 3 4 5
		horse	10	1 2 3 4 5 6 7 8 9 10										horse	9	1 2 3 5 6 7 8 9 10
		exe11	3	R0 U0 gang										exe11	3	R0 U0 gang
		dir	3	L R S										dir	3	L R S
		circle	2	S c										circle	2	S c
		fore	3	inner_fore outer_fore stra_fore										fore	3	inner_fore outer_fore stra_fore
		hind	3	inner_hind outer_hind stra_hind										hind	3	inner_hind outer_hind stra_hind
		rid	2	0 1										rid	2	0 1
		Dimensions												Dimensions
		Covariance Parameters	5											Covariance Parameters	5
		Columns in X	7											Columns in X	7
		Columns in Z	108											Columns in Z	105
		Subjects	1											Subjects	1
		Max Obs per Subject	1180											Max Obs per Subject	1895
		Number of Observations												Number of Observations
		Number of Observations Read	1180											Number of Observations Read	1895
		Number of Observations Used	1180											Number of Observations Used	1895
		Number of Observations Not Used	0											Number of Observations Not Used	0
		Iteration History												Iteration History
		Iteration	Evaluations	-2 Res Log Like	Criterion									Iteration	Evaluations	-2 Res Log Like	Criterion
		0	1	-8444.38										0	1	-11920.3
		1	2	-9124.28	0.00165884									1	4	-13280.5	.
		2	1	-9136.45	0.00078876									2	2	-13281.5	1.862e-05
		3	1	-9142.07	0.00025344									3	1	-13281.7	5.8e-07							78.4
		4	1	-9143.78	3.78e-05									4	1	-13281.7	0
		5	1	-9144.02	1.12e-06
		6	1	-9144.02	0									Convergence criteria met.
		Convergence criteria met.
														Estimated G matrix is not positive definite.
		Estimated G matrix is not positive definite.												Covariance Parameter Estimates
														Cov Parm	Estimate
		Covariance Parameter Estimates												rider	1.1e-05
		Cov Parm	Estimate											horse	0
		rider	0											rider*horse	3.6e-05
		horse	0											exe(rider*horse)	1.7e-05
		rider*horse	2.1e-05											Residual	4.6e-05
		exe(rider*horse)	2.775e-06
		Residual	2.1e-05											Fit Statistics
														-2 Res Log Likelihood	-13281.7
		Fit Statistics												AIC (Smaller is Better)	-13273.7
		-2 Res Log Likelihood	-9144.0											AICC (Smaller is Better)	-13273.7
		AIC (Smaller is Better)	-9138											BIC (Smaller is Better)	-13275.2
		AICC (Smaller is Better)	-9138
		BIC (Smaller is Better)	-9139.2											Solution for Fixed Effects
														Effect	fore	rid	Estimate	Standard	DF	t Value	Pr > |t|
		Solution for Fixed Effects																Error
		Effect	fore	rid	Estimate	Standard	DF	t Value	Pr > |t|					Intercept			0.1345	0.004587	2	29.32	0.0012
						Error								rid(fore)	inner_fore	0	-0.00392	0.001271	1814	-3.08	0.0021
		Intercept			0.03871	0.003389	2	11.42	0.0076					rid(fore)	inner_fore	1	-0.00221	0.001278	1814	-1.73	0.0838
		rid(fore)	inner_fore	0	0.000479	0.000634	1098	0.76	0.4503					rid(fore)	outer_fore	0	-0.00552	0.001268	1814	-4.35	<.0001
		rid(fore)	inner_fore	1	-0.00387	0.000793	1098	-4.87	<.0001					rid(fore)	outer_fore	1	-0.00341	0.001278	1814	-2.67	0.0076
		rid(fore)	outer_fore	0	0.000545	0.000645	1098	0.85	0.398					rid(fore)	stra_fore	0	0	.	.	.	.
		rid(fore)	outer_fore	1	-0.00595	0.000781	1098	-7.62	<.0001					SD			-0.06458	0.003176	1814	-20.33	<.0001
		rid(fore)	stra_fore	0	0	.	.	.	.
		SD			-0.01587	0.002612	1098	-6.08	<.0001					Type 3 Tests of Fixed Effects
	corrected scale	sd1			-2e-05	3.023e-06	1098	-6.08	<.0001					Effect	Num DF	Den DF	F Value	Pr > F
		Type 3 Tests of Fixed Effects												rid(fore)	4	1814	7.48	<.0001
		Effect	Num DF	Den DF	F Value	Pr > F								SD	1	1814	413.51	<.0001
		rid(fore)	4	1098	21.06	<.0001
		SD	1	1098	36.92	<.0001								Least Squares Means
														Effect	fore	rid	Estimate	Standard	DF	t Value	Pr > |t|
		Least Squares Means																Error
		Effect	fore	rid	Estimate	Standard	DF	t Value	Pr > |t|					rid(fore)	inner_fore	0	0.05046	0.002512	1814	20.09	<.0001
						Error								rid(fore)	inner_fore	1	0.05216	0.002518	1814	20.72	<.0001
		rid(fore)	inner_fore	0	0.01953	0.001311	1098	14.9	<.0001					rid(fore)	outer_fore	0	0.04885	0.00251	1814	19.47	<.0001
		rid(fore)	inner_fore	1	0.01519	0.001403	1098	10.82	<.0001					rid(fore)	outer_fore	1	0.05096	0.002517	1814	20.24	<.0001
		rid(fore)	outer_fore	0	0.0196	0.001316	1098	14.89	<.0001					rid(fore)	stra_fore	0	0.05437	0.002499	1814	21.76	<.0001
		rid(fore)	outer_fore	1	0.0131	0.001397	1098	9.38	<.0001
		rid(fore)	stra_fore	0	0.01905	0.001311	1098	14.54	<.0001					Differences of Least Squares Means
														Effect	fore	rid	_fore	_rid	Estimate	Standard	DF	t Value	Pr > |t|
		Differences of Least Squares Means																		Error
		Effect	fore	rid	_fore	_rid	Estimate	Standard	DF	t Value	Pr > |t|			rid(fore)	inner_fore	0	inner_fore	1	-0.0017	0.001275	1814	-1.34	0.1815	1
								Error						rid(fore)	inner_fore	0	outer_fore	0	0.001605	0.000493	1814	3.25	0.0012	2
		rid(fore)	inner_fore	0	inner_fore	1	0.004344	0.000781	1098	5.56	<.0001	1		rid(fore)	inner_fore	0	outer_fore	1	-0.0005	0.001274	1814	-0.4	0.6925
		rid(fore)	inner_fore	0	outer_fore	0	-7e-05	0.000387	1098	-0.17	0.8647	2		rid(fore)	inner_fore	0	stra_fore	0	-0.00392	0.001271	1814	-3.08	0.0021	3
		rid(fore)	inner_fore	0	outer_fore	1	0.00643	0.000771	1098	8.34	<.0001			rid(fore)	inner_fore	1	outer_fore	0	0.003308	0.001271	1814	2.6	0.0093
		rid(fore)	inner_fore	0	stra_fore	0	0.000479	0.000634	1098	0.76	0.4503	3		rid(fore)	inner_fore	1	outer_fore	1	0.0012	0.000552	1814	2.18	0.0297	4
		rid(fore)	inner_fore	1	outer_fore	0	-0.00441	0.000792	1098	-5.57	<.0001			rid(fore)	inner_fore	1	stra_fore	0	-0.00221	0.001278	1814	-1.73	0.0838	5
		rid(fore)	inner_fore	1	outer_fore	1	0.002085	0.000749	1098	2.78	0.0055	4		rid(fore)	outer_fore	0	outer_fore	1	-0.00211	0.00127	1814	-1.66	0.097	6
		rid(fore)	inner_fore	1	stra_fore	0	-0.00387	0.000793	1098	-4.87	<.0001	5		rid(fore)	outer_fore	0	stra_fore	0	-0.00552	0.001268	1814	-4.35	<.0001	7
		rid(fore)	outer_fore	0	outer_fore	1	0.006496	0.00078	1098	8.33	<.0001	6		rid(fore)	outer_fore	1	stra_fore	0	-0.00341	0.001278	1814	-2.67	0.0076	8
		rid(fore)	outer_fore	0	stra_fore	0	0.000545	0.000645	1098	0.85	0.398	7
		rid(fore)	outer_fore	1	stra_fore	0	-0.00595	0.000781	1098	-7.62	<.0001	8
														The SAS System
		The SAS System												The Mixed Procedure
		The Mixed Procedure												Model Information
														Data Set	WORK.NEWA
		Model Information												Dependent Variable	sqrts1MinIndVertT
		Data Set	WORK.NEWA											Covariance Structure	Variance Components
		Dependent Variable	sqrtwiMinIndVertT											Estimation Method	REML
		Covariance Structure	Variance Components											Residual Variance Method	Profile
		Estimation Method	REML											Fixed Effects SE Method	Model-Based
		Residual Variance Method	Profile											Degrees of Freedom Method	Containment
		Fixed Effects SE Method	Model-Based
		Degrees of Freedom Method	Containment											Class Level Information
														Class	Levels	Values
		Class Level Information												h1	13	1 2 3 5 7 8 9 10 11 12 14 15 17
		Class	Levels	Values										exe	6	RLO RRO ULO URO gang gang1
		h1	14	1 2 3 4 5 7 8 9 10 11 12 14 15 17										rider	5	1 2 3 4 5
		exe	6	RLO RRO ULO URO gang gang1										horse	9	1 2 3 5 6 7 8 9 10
		rider	5	1 2 3 4 5										exe11	3	R0 U0 gang
		horse	10	1 2 3 4 5 6 7 8 9 10										dir	3	L R S
		exe11	3	R0 U0 gang										circle	2	S c
		dir	3	L R S										fore	3	inner_fore outer_fore stra_fore
		circle	2	S c										hind	3	inner_hind outer_hind stra_hind
		fore	3	inner_fore outer_fore stra_fore										rid	2	0 1
		hind	3	inner_hind outer_hind stra_hind
		rid	2	0 1										Dimensions
														Covariance Parameters	5
		Dimensions												Columns in X	7
		Covariance Parameters	5											Columns in Z	105
		Columns in X	7											Subjects	1
		Columns in Z	109											Max Obs per Subject	2088
		Subjects	1
		Max Obs per Subject	1414											Number of Observations
														Number of Observations Read	2088
		Number of Observations												Number of Observations Used	2088
		Number of Observations Read	1414											Number of Observations Not Used	0
		Number of Observations Used	1414
		Number of Observations Not Used	0											Iteration History
														Iteration	Evaluations	-2 Res Log Like	Criterion
		Iteration History												0	1	3399.91
		Iteration	Evaluations	-2 Res Log Like	Criterion									1	3	1618.46	0.00048175
		0	1	1644.99										2	2	1618.18	5.615e-05
		1	3	971.171	0.00045998									3	1	1618.11	6.7e-07
		2	1	970.758	1.715e-05									4	1	1618.11	0
		3	1	970.744	3e-08
		4	1	970.744	0									Convergence criteria met.
		Convergence criteria met.
														Estimated G matrix is not positive definite.
		Estimated G matrix is not positive definite.												Covariance Parameter Estimates
														Cov Parm	Estimate
		Covariance Parameter Estimates												rider	0
		Cov Parm	Estimate											horse	0.07603
		rider	0											rider*horse	0.02417
		horse	0.03219											exe(rider*horse)	0.1182
		rider*horse	0.01335											Residual	0.1106
		exe(rider*horse)	0.05404
		Residual	0.1											Fit Statistics
														-2 Res Log Likelihood	1618.1
		Fit Statistics												AIC (Smaller is Better)	1626.1
		-2 Res Log Likelihood	970.7											AICC (Smaller is Better)	1626.1
		AIC (Smaller is Better)	978.7											BIC (Smaller is Better)	1624.5
		AICC (Smaller is Better)	978.8
		BIC (Smaller is Better)	977.2											Solution for Fixed Effects
														Effect	fore	rid	Estimate	Standard	DF	t Value	Pr > |t|
		Solution for Fixed Effects																Error
		Effect	fore	rid	Estimate	Standard	DF	t Value	Pr > |t|					Intercept			3.5033	0.2194	2	15.97	0.0039
						Error								rid(fore)	inner_fore	0	0.1688	0.09905	2007	1.7	0.0885
		Intercept			8.3485	0.2142	2	38.98	0.0007					rid(fore)	inner_fore	1	0.3935	0.0991	2007	3.97	<.0001
		rid(fore)	inner_fore	0	0.1977	0.06989	1331	2.83	0.0047					rid(fore)	outer_fore	0	0.03326	0.09905	2007	0.34	0.7371
		rid(fore)	inner_fore	1	0.133	0.07449	1331	1.79	0.0744					rid(fore)	outer_fore	1	0.2207	0.09915	2007	2.23	0.0261
		rid(fore)	outer_fore	0	0.008494	0.07044	1331	0.12	0.904					rid(fore)	stra_fore	0	0	.	.	.	.
		rid(fore)	outer_fore	1	-0.1205	0.07427	1331	-1.62	0.1049					SD			1.4692	0.1513	2007	9.71	<.0001
		rid(fore)	stra_fore	0	0	.	.	.	.
		SD			0.2754	0.1653	1331	1.67	0.0959					Type 3 Tests of Fixed Effects
														Effect	Num DF	Den DF	F Value	Pr > F
		Type 3 Tests of Fixed Effects												rid(fore)	4	2007	23.4	<.0001
		Effect	Num DF	Den DF	F Value	Pr > F								SD	1	2007	94.27	<.0001
		rid(fore)	4	1331	24.82	<.0001
		SD	1	1331	2.78	0.0959								Least Squares Means
														Effect	fore	rid	Estimate	Standard	DF	t Value	Pr > |t|
		Least Squares Means																Error
		Effect	fore	rid	Estimate	Standard	DF	t Value	Pr > |t|					rid(fore)	inner_fore	0	5.4996	0.1244	2007	44.19	<.0001
						Error								rid(fore)	inner_fore	1	5.7244	0.1247	2007	45.92	<.0001
		rid(fore)	inner_fore	0	8.8902	0.08126	1331	109.4	<.0001					rid(fore)	outer_fore	0	5.3641	0.1244	2007	43.1	<.0001
		rid(fore)	inner_fore	1	8.8256	0.08614	1331	102.46	<.0001					rid(fore)	outer_fore	1	5.5516	0.1247	2007	44.52	<.0001
		rid(fore)	outer_fore	0	8.701	0.08172	1331	106.48	<.0001					rid(fore)	stra_fore	0	5.3308	0.1243	2007	42.9	<.0001
		rid(fore)	outer_fore	1	8.5721	0.08602	1331	99.65	<.0001
		rid(fore)	stra_fore	0	8.6926	0.08291	1331	104.84	<.0001					Differences of Least Squares Means
														Effect	fore	rid	_fore	_rid	Estimate	Standard	DF	t Value	Pr > |t|
		Differences of Least Squares Means																		Error
		Effect	fore	rid	_fore	_rid	Estimate	Standard	DF	t Value	Pr > |t|			rid(fore)	inner_fore	0	inner_fore	1	-0.2247	0.09884	2007	-2.27	0.0231	1
								Error						rid(fore)	inner_fore	0	outer_fore	0	0.1355	0.02273	2007	5.96	<.0001	2
		rid(fore)	inner_fore	0	inner_fore	1	0.06465	0.07273	1331	0.89	0.3742	1		rid(fore)	inner_fore	0	outer_fore	1	-0.05193	0.09888	2007	-0.53	0.5995
		rid(fore)	inner_fore	0	outer_fore	0	0.1892	0.02505	1331	7.55	<.0001	2		rid(fore)	inner_fore	0	stra_fore	0	0.1688	0.09905	2007	1.7	0.0885	3
		rid(fore)	inner_fore	0	outer_fore	1	0.3182	0.07264	1331	4.38	<.0001			rid(fore)	inner_fore	1	outer_fore	0	0.3603	0.09885	2007	3.64	0.0003
		rid(fore)	inner_fore	0	stra_fore	0	0.1977	0.06989	1331	2.83	0.0047	3		rid(fore)	inner_fore	1	outer_fore	1	0.1728	0.025	2007	6.91	<.0001	4
		rid(fore)	inner_fore	1	outer_fore	0	0.1245	0.07321	1331	1.7	0.0892			rid(fore)	inner_fore	1	stra_fore	0	0.3935	0.0991	2007	3.97	<.0001	5
		rid(fore)	inner_fore	1	outer_fore	1	0.2535	0.04074	1331	6.22	<.0001	4		rid(fore)	outer_fore	0	outer_fore	1	-0.1875	0.09888	2007	-1.9	0.0581	6
		rid(fore)	inner_fore	1	stra_fore	0	0.133	0.07449	1331	1.79	0.0744	5		rid(fore)	outer_fore	0	stra_fore	0	0.03326	0.09905	2007	0.34	0.7371	7
		rid(fore)	outer_fore	0	outer_fore	1	0.129	0.07312	1331	1.76	0.0779	6		rid(fore)	outer_fore	1	stra_fore	0	0.2207	0.09915	2007	2.23	0.0261	8
		rid(fore)	outer_fore	0	stra_fore	0	0.008494	0.07044	1331	0.12	0.904	7
		rid(fore)	outer_fore	1	stra_fore	0	-0.1205	0.07427	1331	-1.62	0.1049	8
														The SAS System
		The SAS System												The Mixed Procedure
		The Mixed Procedure												Model Information
														Data Set	WORK.NEWA
		Model Information												Dependent Variable	sqs1MaxIndVertT
		Data Set	WORK.NEWA											Covariance Structure	Variance Components
		Dependent Variable	sqrtwiMaxIndVertT											Estimation Method	REML
		Covariance Structure	Variance Components											Residual Variance Method	Profile
		Estimation Method	REML											Fixed Effects SE Method	Model-Based
		Residual Variance Method	Profile											Degrees of Freedom Method	Containment
		Fixed Effects SE Method	Model-Based
		Degrees of Freedom Method	Containment											Class Level Information
														Class	Levels	Values
		Class Level Information												h1	13	1 2 3 5 7 8 9 10 11 12 14 15 17
		Class	Levels	Values										exe	6	RLO RRO ULO URO gang gang1
		h1	14	1 2 3 4 5 7 8 9 10 11 12 14 15 17										rider	5	1 2 3 4 5
		exe	6	RLO RRO ULO URO gang gang1										horse	9	1 2 3 5 6 7 8 9 10
		rider	5	1 2 3 4 5										exe11	3	R0 U0 gang
		horse	10	1 2 3 4 5 6 7 8 9 10										dir	3	L R S
		exe11	3	R0 U0 gang										circle	2	S c
		dir	3	L R S										fore	3	inner_fore outer_fore stra_fore
		circle	2	S c										hind	3	inner_hind outer_hind stra_hind
		fore	3	inner_fore outer_fore stra_fore										rid	2	0 1
		hind	3	inner_hind outer_hind stra_hind
		rid	2	0 1										Dimensions
														Covariance Parameters	5
		Dimensions												Columns in X	7
		Covariance Parameters	5											Columns in Z	105
		Columns in X	7											Subjects	1
		Columns in Z	109											Max Obs per Subject	1900
		Subjects	1
		Max Obs per Subject	1467											Number of Observations
														Number of Observations Read	1900
		Number of Observations												Number of Observations Used	1900
		Number of Observations Read	1467											Number of Observations Not Used	0
		Number of Observations Used	1467
		Number of Observations Not Used	0											Iteration History
														Iteration	Evaluations	-2 Res Log Like	Criterion
		Iteration History												0	1	31718.6
		Iteration	Evaluations	-2 Res Log Like	Criterion									1	4	29863.3	2.313e-05
		0	1	2721.12										2	1	29863	3.86e-06
		1	2	2160.13	0.00571716									3	1	29862.9	1.6e-07
		2	3	2157.44	0.00077787									4	1	29862.9	0
		3	1	2157.24	3.761e-05
		4	1	2157.23	4.3e-07									Convergence criteria met.
		5	1	2157.23	0
		Convergence criteria met.												Estimated G matrix is not positive definite.
														Covariance Parameter Estimates
		Estimated G matrix is not positive definite.												Cov Parm	Estimate
														rider	0
		Covariance Parameter Estimates												horse	488525
		Cov Parm	Estimate											rider*horse	0
		rider	0.01279											exe(rider*horse)	433020
		horse	0											Residual	352709
		rider*horse	0.04006
		exe(rider*horse)	0.1403											Fit Statistics
		Residual	0.2205											-2 Res Log Likelihood	29862.9
														AIC (Smaller is Better)	29868.9
		Fit Statistics												AICC (Smaller is Better)	29868.9
		-2 Res Log Likelihood	2157.2											BIC (Smaller is Better)	29867.7
		AIC (Smaller is Better)	2165.2
		AICC (Smaller is Better)	2165.3											Solution for Fixed Effects
		BIC (Smaller is Better)	2163.7											Effect	fore	rid	Estimate	Standard	DF	t Value	Pr > |t|
																		Error
		Solution for Fixed Effects												Intercept			5050.81	433.6	2	11.65	0.0073
		Effect	fore	rid	Estimate	Standard	DF	t Value	Pr > |t|					rid(fore)	inner_fore	0	703.09	189.35	1819	3.71	0.0002
						Error								rid(fore)	inner_fore	1	1232.61	189.79	1819	6.49	<.0001
		Intercept			2.5105	0.328	2	7.65	0.0166					rid(fore)	outer_fore	0	258.66	189.19	1819	1.37	0.1717
		rid(fore)	inner_fore	0	0.3505	0.1113	1384	3.15	0.0017					rid(fore)	outer_fore	1	726.05	189.74	1819	3.83	0.0001
		rid(fore)	inner_fore	1	0.3255	0.1187	1384	2.74	0.0062					rid(fore)	stra_fore	0	0	.	.	.	.
		rid(fore)	outer_fore	0	0.3765	0.1112	1384	3.38	0.0007					SD			1278.24	284.79	1819	4.49	<.0001
		rid(fore)	outer_fore	1	0.4454	0.1175	1384	3.79	0.0002
		rid(fore)	stra_fore	0	0	.	.	.	.					Type 3 Tests of Fixed Effects
		SD			1.764	0.2568	1384	6.87	<.0001					Effect	Num DF	Den DF	F Value	Pr > F
														rid(fore)	4	1819	60.59	<.0001
		Type 3 Tests of Fixed Effects												SD	1	1819	20.15	<.0001
		Effect	Num DF	Den DF	F Value	Pr > F
		rid(fore)	4	1384	5.02	0.0005								Least Squares Means
		SD	1	1384	47.19	<.0001								Effect	fore	rid	Estimate	Standard	DF	t Value	Pr > |t|
																		Error
		Least Squares Means												rid(fore)	inner_fore	0	7339.11	269.86	1819	27.2	<.0001
		Effect	fore	rid	Estimate	Standard	DF	t Value	Pr > |t|					rid(fore)	inner_fore	1	7868.63	270.4	1819	29.1	<.0001
						Error								rid(fore)	outer_fore	0	6894.68	269.71	1819	25.56	<.0001
		rid(fore)	inner_fore	0	5.0418	0.1089	1384	46.29	<.0001					rid(fore)	outer_fore	1	7362.07	270.39	1819	27.23	<.0001
		rid(fore)	inner_fore	1	5.0168	0.1182	1384	42.45	<.0001					rid(fore)	stra_fore	0	6636.02	269.37	1819	24.64	<.0001
		rid(fore)	outer_fore	0	5.0678	0.1089	1384	46.55	<.0001
		rid(fore)	outer_fore	1	5.1367	0.1171	1384	43.87	<.0001					Differences of Least Squares Means
		rid(fore)	stra_fore	0	4.6913	0.1105	1384	42.44	<.0001					Effect	fore	rid	_fore	_rid	Estimate	Standard	DF	t Value	Pr > |t|
																				Error
		Differences of Least Squares Means												rid(fore)	inner_fore	0	inner_fore	1	-529.52	189.46	1819	-2.79	0.0052	1
		Effect	fore	rid	_fore	_rid	Estimate	Standard	DF	t Value	Pr > |t|			rid(fore)	inner_fore	0	outer_fore	0	444.44	43.2008	1819	10.29	<.0001	2
								Error						rid(fore)	inner_fore	0	outer_fore	1	-22.9559	189.4	1819	-0.12	0.9035
		rid(fore)	inner_fore	0	inner_fore	1	0.02503	0.1168	1384	0.21	0.8303	1		rid(fore)	inner_fore	0	stra_fore	0	703.09	189.35	1819	3.71	0.0002	3
		rid(fore)	inner_fore	0	outer_fore	0	-0.02598	0.03509	1384	-0.74	0.4591	2		rid(fore)	inner_fore	1	outer_fore	0	973.96	189.25	1819	5.15	<.0001
		rid(fore)	inner_fore	0	outer_fore	1	-0.09495	0.1157	1384	-0.82	0.4121			rid(fore)	inner_fore	1	outer_fore	1	506.57	48.424	1819	10.46	<.0001	4
		rid(fore)	inner_fore	0	stra_fore	0	0.3505	0.1113	1384	3.15	0.0017	3		rid(fore)	inner_fore	1	stra_fore	0	1232.61	189.79	1819	6.49	<.0001	5
		rid(fore)	inner_fore	1	outer_fore	0	-0.05101	0.1167	1384	-0.44	0.6622			rid(fore)	outer_fore	0	outer_fore	1	-467.39	189.18	1819	-2.47	0.0136	6
		rid(fore)	inner_fore	1	outer_fore	1	-0.12	0.05646	1384	-2.12	0.0338	4		rid(fore)	outer_fore	0	stra_fore	0	258.66	189.19	1819	1.37	0.1717	7
		rid(fore)	inner_fore	1	stra_fore	0	0.3255	0.1187	1384	2.74	0.0062	5		rid(fore)	outer_fore	1	stra_fore	0	726.05	189.74	1819	3.83	0.0001	8
		rid(fore)	outer_fore	0	outer_fore	1	-0.06896	0.1157	1384	-0.6	0.5511	6
		rid(fore)	outer_fore	0	stra_fore	0	0.3765	0.1112	1384	3.38	0.0007	7
		rid(fore)	outer_fore	1	stra_fore	0	0.4454	0.1175	1384	3.79	0.0002	8
														The SAS System
														The Mixed Procedure
		The SAS System
														Model Information
		The Mixed Procedure												Data Set	WORK.NEWA
														Dependent Variable	s1MINxxxVertT
		Model Information												Covariance Structure	Variance Components
		Data Set	WORK.NEWA											Estimation Method	REML
		Dependent Variable	wiMINxxxVertT											Residual Variance Method	Profile
		Covariance Structure	Variance Components											Fixed Effects SE Method	Model-Based
		Estimation Method	REML											Degrees of Freedom Method	Containment
		Residual Variance Method	Profile
		Fixed Effects SE Method	Model-Based											Class Level Information
		Degrees of Freedom Method	Containment											Class	Levels	Values
														h1	13	1 2 3 5 7 8 9 10 11 12 14 15 17
		Class Level Information												exe	6	RLO RRO ULO URO gang gang1
		Class	Levels	Values										rider	5	1 2 3 4 5
		h1	14	1 2 3 4 5 7 8 9 10 11 12 14 15 17										horse	9	1 2 3 5 6 7 8 9 10
		exe	6	RLO RRO ULO URO gang gang1										exe11	3	R0 U0 gang
		rider	5	1 2 3 4 5										dir	3	L R S
		horse	10	1 2 3 4 5 6 7 8 9 10										circle	2	S c
		exe11	3	R0 U0 gang										fore	3	inner_fore outer_fore stra_fore
		dir	3	L R S										hind	3	inner_hind outer_hind stra_hind
		circle	2	S c										rid	2	0 1
		fore	3	inner_fore outer_fore stra_fore										IDP	1052	1 2 3 4 5 6 7 8 9 10 11 12 13 14 15 16 17 18 19 20 21 22 23 24 25 26 27 28 29 30 31 32 33 38 39 40 41 42 43 44 45 46 47 56 57 58 59 60 61 62 63 64 65 66 67 68 69 70 71 72 73 74 75 76 77 78 79 80 81 82 83 84 85 86 87 88 89 90 91 92 93 94 95 96 97 98 99 100 101 102 103 104 105 106 107 108 109 110 111 112 113 114 115 116 117 118 119 120 121 122 123 124 125 126 127 128 129 130 131 132 133 134 135 136…
		hind	3	inner_hind outer_hind stra_hind
		rid	2	0 1										Dimensions
		IDP	904	1 2 3 4 5 6 7 8 9 10 11 12 13 14 15 16 17 18 19 20 21 22 23 24 25 26 27 28 30 31 32 33 34 35 36 37 38 39 40 41 42 43 44 45 46 47 56 57 58 59 60 61 62 63 64 65 66 67 68 69 70 71 72 73 74 75 76 77 78 79 80 81 82 83 84 85 87 88 89 90 91 92 93 94 95 96 97 98 99 100 101 102 103 104 105 106 107 108 109 110 111 112 113 114 115 116 117 118 119 120 121 122 123 124 125 126 127 128 129 131 132 133 134 135 1…										Covariance Parameters	6
														Columns in X	7
		Dimensions												Columns in Z	1157
		Covariance Parameters	6											Subjects	1
		Columns in X	7											Max Obs per Subject	2088
		Columns in Z	1013
		Subjects	1											Number of Observations
		Max Obs per Subject	1414											Number of Observations Read	2088
														Number of Observations Used	2088
		Number of Observations												Number of Observations Not Used	0
		Number of Observations Read	1414
		Number of Observations Used	1414											Iteration History
		Number of Observations Not Used	0											Iteration	Evaluations	-2 Res Log Like	Criterion
														0	1	-14978.8
		Iteration History												1	3	-15839.3	4.371e-05
		Iteration	Evaluations	-2 Res Log Like	Criterion									2	2	-15839.8	5.54e-06
		0	1	-11149.3										3	2	-15839.9	2.2e-07
		1	2	-11467.6	0.00029061									4	1	-15839.9	0
		2	2	-11470	5.255e-05
		3	2	-11470.5	2.36e-06									Convergence criteria met.
		4	2	-11470.5	1e-08
		Convergence criteria met.												Estimated G matrix is not positive definite.
														Covariance Parameter Estimates
		Estimated G matrix is not positive definite.												Cov Parm	Estimate
														rider	3.426e-06
		Covariance Parameter Estimates												horse	0
		Cov Parm	Estimate											rider*horse	9.955e-06
		rider	0											exe(rider*horse)	3.81e-06
		horse	3.388e-07											exe(rider*horse*IDP)	0
		rider*horse	5.034e-06											Residual	2.7e-05
		exe(rider*horse)	6.719e-07
		exe(rider*horse*IDP)	0											Fit Statistics
		Residual	1.6e-05											-2 Res Log Likelihood	-15839.9
														AIC (Smaller is Better)	-15831.9
		Fit Statistics												AICC (Smaller is Better)	-15831.8
		-2 Res Log Likelihood	-11470.5											BIC (Smaller is Better)	-15833.4
		AIC (Smaller is Better)	-11462.5
		AICC (Smaller is Better)	-11462.4											Solution for Fixed Effects
		BIC (Smaller is Better)	-11464											Effect	fore	rid	Estimate	Standard	DF	t Value	Pr > |t|
																		Error
		Solution for Fixed Effects												Intercept			-0.0679	0.00294	2	-23.09	0.0019
		Effect	fore	rid	Estimate	Standard	DF	t Value	Pr > |t|					rid(fore)	inner_fore	0	0.000131	0.000673	1033	0.19	0.8459
						Error								rid(fore)	inner_fore	1	-0.0001	0.000675	1033	-0.15	0.8837
		Intercept			-0.01769	0.002231	2	-7.93	0.0155					rid(fore)	outer_fore	0	0.004696	0.000673	1033	6.97	<.0001
		rid(fore)	inner_fore	0	-0.00091	0.000399	508	-2.27	0.0235					rid(fore)	outer_fore	1	0.00367	0.000677	1033	5.42	<.0001
		rid(fore)	inner_fore	1	0.001152	0.000472	508	2.44	0.0151					rid(fore)	stra_fore	0	0	.	.	.	.
		rid(fore)	outer_fore	0	-0.00048	0.000412	508	-1.17	0.2424					SD			0.03204	0.00215	1033	14.9	<.0001
		rid(fore)	outer_fore	1	0.002125	0.000483	508	4.4	<.0001
		rid(fore)	stra_fore	0	0	.	.	.	.					Type 3 Tests of Fixed Effects
		SD			0.007018	0.001769	508	3.97	<.0001					Effect	Num DF	Den DF	F Value	Pr > F
														rid(fore)	4	1033	68.83	<.0001
		Type 3 Tests of Fixed Effects												SD	1	1033	222.05	<.0001
		Effect	Num DF	Den DF	F Value	Pr > F
		rid(fore)	4	508	11.06	<.0001								Least Squares Means
		SD	1	508	15.74	<.0001								Effect	fore	rid	Estimate	Standard	DF	t Value	Pr > |t|
																		Error
		Least Squares Means												rid(fore)	inner_fore	0	-0.02791	0.001358	1033	-20.55	<.0001
		Effect	fore	rid	Estimate	Standard	DF	t Value	Pr > |t|					rid(fore)	inner_fore	1	-0.02814	0.001362	1033	-20.67	<.0001
						Error								rid(fore)	outer_fore	0	-0.02335	0.001358	1033	-17.19	<.0001
		rid(fore)	inner_fore	0	-0.00983	0.000688	508	-14.3	<.0001					rid(fore)	outer_fore	1	-0.02437	0.001363	1033	-17.89	<.0001
		rid(fore)	inner_fore	1	-0.00778	0.000737	508	-10.55	<.0001					rid(fore)	stra_fore	0	-0.02804	0.001349	1033	-20.79	<.0001
		rid(fore)	outer_fore	0	-0.00941	0.000695	508	-13.54	<.0001
		rid(fore)	outer_fore	1	-0.0068	0.000746	508	-9.12	<.0001					Differences of Least Squares Means
		rid(fore)	stra_fore	0	-0.00893	0.000688	508	-12.98	<.0001					Effect	fore	rid	_fore	_rid	Estimate	Standard	DF	t Value	Pr > |t|
																				Error
		Differences of Least Squares Means												rid(fore)	inner_fore	0	inner_fore	1	0.00023	0.000673	1033	0.34	0.7327
		Effect	fore	rid	_fore	_rid	Estimate	Standard	DF	t Value	Pr > |t|			rid(fore)	inner_fore	0	outer_fore	0	-0.00456	0.000353	1033	-12.92	<.0001	2
								Error						rid(fore)	inner_fore	0	outer_fore	1	-0.00354	0.000674	1033	-5.25	<.0001
		rid(fore)	inner_fore	0	inner_fore	1	-0.00206	0.000458	508	-4.49	<.0001			rid(fore)	inner_fore	0	stra_fore	0	0.000131	0.000673	1033	0.19	0.8459
		rid(fore)	inner_fore	0	outer_fore	0	-0.00042	0.000311	508	-1.36	0.1729	2		rid(fore)	inner_fore	1	outer_fore	0	-0.00479	0.000673	1033	-7.13	<.0001
		rid(fore)	inner_fore	0	outer_fore	1	-0.00303	0.000477	508	-6.36	<.0001			rid(fore)	inner_fore	1	outer_fore	1	-0.00377	0.000389	1033	-9.7	<.0001	4
		rid(fore)	inner_fore	0	stra_fore	0	-0.00091	0.000399	508	-2.27	0.0235			rid(fore)	inner_fore	1	stra_fore	0	-0.0001	0.000675	1033	-0.15	0.8837
		rid(fore)	inner_fore	1	outer_fore	0	0.001634	0.000469	508	3.48	0.0005			rid(fore)	outer_fore	0	outer_fore	1	0.001026	0.000674	1033	1.52	0.1282
		rid(fore)	inner_fore	1	outer_fore	1	-0.00097	0.000479	508	-2.03	0.0427	4		rid(fore)	outer_fore	0	stra_fore	0	0.004696	0.000673	1033	6.97	<.0001
		rid(fore)	inner_fore	1	stra_fore	0	0.001152	0.000472	508	2.44	0.0151			rid(fore)	outer_fore	1	stra_fore	0	0.00367	0.000677	1033	5.42	<.0001
		rid(fore)	outer_fore	0	outer_fore	1	-0.00261	0.000487	508	-5.35	<.0001
		rid(fore)	outer_fore	0	stra_fore	0	-0.00048	0.000412	508	-1.17	0.2424
		rid(fore)	outer_fore	1	stra_fore	0	0.002125	0.000483	508	4.4	<.0001
														The SAS System
														The Mixed Procedure
		The SAS System
														Model Information
		The Mixed Procedure												Data Set	WORK.NEWA
														Dependent Variable	s1MAXxxxVertT
		Model Information												Covariance Structure	Variance Components
		Data Set	WORK.NEWA											Estimation Method	REML
		Dependent Variable	wiMAXxxxVertT											Residual Variance Method	Profile
		Covariance Structure	Variance Components											Fixed Effects SE Method	Model-Based
		Estimation Method	REML											Degrees of Freedom Method	Containment
		Residual Variance Method	Profile
		Fixed Effects SE Method	Model-Based											Class Level Information
		Degrees of Freedom Method	Containment											Class	Levels	Values
														h1	13	1 2 3 5 7 8 9 10 11 12 14 15 17
		Class Level Information												exe	6	RLO RRO ULO URO gang gang1
		Class	Levels	Values										rider	5	1 2 3 4 5
		h1	14	1 2 3 4 5 7 8 9 10 11 12 14 15 17										horse	9	1 2 3 5 6 7 8 9 10
		exe	6	RLO RRO ULO URO gang gang1										exe11	3	R0 U0 gang
		rider	5	1 2 3 4 5										dir	3	L R S
		horse	10	1 2 3 4 5 6 7 8 9 10										circle	2	S c
		exe11	3	R0 U0 gang										fore	3	inner_fore outer_fore stra_fore
		dir	3	L R S										hind	3	inner_hind outer_hind stra_hind
		circle	2	S c										rid	2	0 1
		fore	3	inner_fore outer_fore stra_fore										IDP	1043	1 2 3 4 5 6 7 8 9 10 11 12 13 14 15 16 17 18 19 20 21 22 23 24 25 26 27 28 29 30 31 32 33 38 39 40 41 42 43 44 45 46 47 56 57 58 59 60 61 62 63 64 65 66 67 68 69 70 71 72 73 74 75 76 77 78 79 80 81 82 83 84 85 86 87 88 89 90 91 92 93 94 95 96 97 98 99 100 101 102 103 104 105 106 107 108 109 110 111 112 113 114 115 116 117 118 119 120 121 122 124 125 126 127 128 129 130 131 132 133 134 135 136 138…
		hind	3	inner_hind outer_hind stra_hind
		rid	2	0 1										Dimensions
		IDP	891	1 2 3 4 5 6 7 8 9 10 11 12 13 14 15 16 17 18 19 20 21 22 23 24 25 26 27 28 29 30 33 34 35 36 37 40 44 45 46 47 56 57 58 59 60 61 62 63 64 65 66 67 68 69 70 71 72 73 74 75 76 77 78 79 80 81 82 83 84 85 87 88 89 90 91 92 93 94 95 96 97 98 99 100 101 102 103 104 105 106 107 108 109 110 111 112 113 114 115 116 117 118 119 120 121 123 124 125 126 127 128 129 130 131 132 133 134 135 136 137 138 139 142…										Covariance Parameters	6
														Columns in X	7
		Dimensions												Columns in Z	1148
		Covariance Parameters	6											Subjects	1
		Columns in X	7											Max Obs per Subject	1900
		Columns in Z	1000
		Subjects	1											Number of Observations
		Max Obs per Subject	1467											Number of Observations Read	1900
														Number of Observations Used	1900
		Number of Observations												Number of Observations Not Used	0
		Number of Observations Read	1467
		Number of Observations Used	1467											Iteration History
		Number of Observations Not Used	0											Iteration	Evaluations	-2 Res Log Like	Criterion
														0	1	-14445.9
		Iteration History												1	3	-15401.3	3.624e-05
		Iteration	Evaluations	-2 Res Log Like	Criterion									2	2	-15401.7	1.71e-06
		0	1	-11963.3										3	1	-15401.7	1e-08
		1	2	-12496.1	2.441e-05									4	1	-15401.7	0
		2	1	-12496.3	6e-07
		3	1	-12496.3	0									Convergence criteria met.
		Convergence criteria met.
														Estimated G matrix is not positive definite.
		Estimated G matrix is not positive definite.												Covariance Parameter Estimates
														Cov Parm	Estimate
		Covariance Parameter Estimates												rider	1.69e-06
		Cov Parm	Estimate											horse	0
		rider	0											rider*horse	8.906e-06
		horse	0											exe(rider*horse)	3.338e-06
		rider*horse	5.18e-06											exe(rider*horse*IDP)	0
		exe(rider*horse)	8.328e-07											Residual	1.6e-05
		exe(rider*horse*IDP)	0
		Residual	1e-05											Fit Statistics
														-2 Res Log Likelihood	-15401.7
		Fit Statistics												AIC (Smaller is Better)	-15393.7
		-2 Res Log Likelihood	-12496.3											AICC (Smaller is Better)	-15393.7
		AIC (Smaller is Better)	-12490.3											BIC (Smaller is Better)	-15395.3
		AICC (Smaller is Better)	-12490.3
		BIC (Smaller is Better)	-12491.5											Solution for Fixed Effects
														Effect	fore	rid	Estimate	Standard	DF	t Value	Pr > |t|
		Solution for Fixed Effects																Error
		Effect	fore	rid	Estimate	Standard	DF	t Value	Pr > |t|					Intercept			0.06831	0.002425	2	28.17	0.0013
						Error								rid(fore)	inner_fore	0	-0.00349	0.000602	854	-5.8	<.0001
		Intercept			0.02175	0.002008	2	10.83	0.0084					rid(fore)	inner_fore	1	-0.00203	0.000607	854	-3.34	0.0009
		rid(fore)	inner_fore	0	-6e-05	0.000375	574	-0.15	0.8814					rid(fore)	outer_fore	0	-0.00015	0.0006	854	-0.24	0.8083
		rid(fore)	inner_fore	1	-0.00298	0.000437	574	-6.83	<.0001					rid(fore)	outer_fore	1	0.000819	0.000607	854	1.35	0.1776
		rid(fore)	outer_fore	0	0.000307	0.000374	574	0.82	0.4125					rid(fore)	stra_fore	0	0	.	.	.	.
		rid(fore)	outer_fore	1	-0.00343	0.000422	574	-8.12	<.0001					SD			-0.03436	0.001775	854	-19.35	<.0001
		rid(fore)	stra_fore	0	0	.	.	.	.
		SD			-0.00974	0.001583	574	-6.15	<.0001					Type 3 Tests of Fixed Effects
														Effect	Num DF	Den DF	F Value	Pr > F
		Type 3 Tests of Fixed Effects												rid(fore)	4	854	56.18	<.0001
		Effect	Num DF	Den DF	F Value	Pr > F								SD	1	854	374.45	<.0001
		rid(fore)	4	574	25.79	<.0001
		SD	1	574	37.84	<.0001								Least Squares Means
														Effect	fore	rid	Estimate	Standard	DF	t Value	Pr > |t|
		Least Squares Means																Error
		Effect	fore	rid	Estimate	Standard	DF	t Value	Pr > |t|					rid(fore)	inner_fore	0	0.02222	0.001142	854	19.45	<.0001
						Error								rid(fore)	inner_fore	1	0.02368	0.001147	854	20.65	<.0001
		rid(fore)	inner_fore	0	0.00965	0.000662	574	14.58	<.0001					rid(fore)	outer_fore	0	0.02556	0.001141	854	22.41	<.0001
		rid(fore)	inner_fore	1	0.006723	0.000706	574	9.53	<.0001					rid(fore)	outer_fore	1	0.02653	0.001146	854	23.14	<.0001
		rid(fore)	outer_fore	0	0.01001	0.000662	574	15.13	<.0001					rid(fore)	stra_fore	0	0.02571	0.001134	854	22.67	<.0001
		rid(fore)	outer_fore	1	0.006279	0.000697	574	9	<.0001
		rid(fore)	stra_fore	0	0.009706	0.00066	574	14.7	<.0001					Differences of Least Squares Means
														Effect	fore	rid	_fore	_rid	Estimate	Standard	DF	t Value	Pr > |t|
		Differences of Least Squares Means																		Error
		Effect	fore	rid	_fore	_rid	Estimate	Standard	DF	t Value	Pr > |t|			rid(fore)	inner_fore	0	inner_fore	1	-0.00146	0.000606	854	-2.41	0.0163
								Error						rid(fore)	inner_fore	0	outer_fore	0	-0.00334	0.000287	854	-11.67	<.0001	2
		rid(fore)	inner_fore	0	inner_fore	1	0.002927	0.000435	574	6.72	<.0001			rid(fore)	inner_fore	0	outer_fore	1	-0.00431	0.000606	854	-7.11	<.0001
		rid(fore)	inner_fore	0	outer_fore	0	-0.00036	0.000239	574	-1.52	0.1297	2		rid(fore)	inner_fore	0	stra_fore	0	-0.00349	0.000602	854	-5.8	<.0001
		rid(fore)	inner_fore	0	outer_fore	1	0.003371	0.000423	574	7.96	<.0001			rid(fore)	inner_fore	1	outer_fore	0	-0.00188	0.000604	854	-3.12	0.0019
		rid(fore)	inner_fore	0	stra_fore	0	-6e-05	0.000375	574	-0.15	0.8814			rid(fore)	inner_fore	1	outer_fore	1	-0.00285	0.000321	854	-8.89	<.0001	4
		rid(fore)	inner_fore	1	outer_fore	0	-0.00329	0.000435	574	-7.56	<.0001			rid(fore)	inner_fore	1	stra_fore	0	-0.00203	0.000607	854	-3.34	0.0009
		rid(fore)	inner_fore	1	outer_fore	1	0.000444	0.000378	574	1.17	0.2408	4		rid(fore)	outer_fore	0	outer_fore	1	-0.00096	0.000603	854	-1.6	0.1099
		rid(fore)	inner_fore	1	stra_fore	0	-0.00298	0.000437	574	-6.83	<.0001			rid(fore)	outer_fore	0	stra_fore	0	-0.00015	0.0006	854	-0.24	0.8083
		rid(fore)	outer_fore	0	outer_fore	1	0.003734	0.000423	574	8.84	<.0001			rid(fore)	outer_fore	1	stra_fore	0	0.000819	0.000607	854	1.35	0.1776
		rid(fore)	outer_fore	0	stra_fore	0	0.000307	0.000374	574	0.82	0.4125
		rid(fore)	outer_fore	1	stra_fore	0	-0.00343	0.000422	574	-8.12	<.0001

## Sheet: mod2Res
	The SAS System
	The Mixed Procedure
	Model Information
	Data Set	WORK.LIMBSALL
cannon	Dependent Variable	P			cannon
ROM	Covariance Structure	Variance Components			ROM
	Estimation Method	REML
	Residual Variance Method	Profile
	Fixed Effects SE Method	Model-Based
	Degrees of Freedom Method	Containment
	Class Level Information
	Class	Levels	Values
	h1	14	1 2 3 4 5 7 8 9 10 11 12 14 15 17
	exe	6	RLO RRO ULO URO gang gang1
	rider	5	1 2 3 4 5
	horse	10	1 2 3 4 5 6 7 8 9 10
	exe11	3	R0 U0 gang
	dir	3	L R S
	circle	2	S c
	limb	6	inner_fore inner_hind outer_fore outer_hind strai_fore strai_hind
	rid	2	0 1
	IDD	1058	1 2 3 4 5 6 7 8 9 10 11 12 13 14 15 16 17 18 19 20 21 22 23 24 25 26 27 28 29 30 31 32 33 34 35 36 37 38 39 40 41 42 43 44 45 46 47 56 57 58 59 60 61 62 63 64 65 66 67 68 69 70 71 72 73 74 75 76 77 78 79 80 81 82 83 84 85 86 87 88 89 90 91 92 93 94 95 96 97 98 99 100 101 102 103 104 105 106 107 108 109 110 111 112 113 114 115 116 117 118 119 120 121 122 123 124 125 126 127 128 129 130 131 132 133…
	Dimensions
	Covariance Parameters	5
	Columns in X	12
	Columns in Z	113
	Subjects	1
	Max Obs per Subject	4232
	Number of Observations
	Number of Observations Read	4232
	Number of Observations Used	4232
	Number of Observations Not Used	0
	Iteration History
	Iteration	Evaluations	-2 Res Log Like	Criterion
	0	1	24683.1
	1	2	21635.8	97.8305
	2	1	21625.8	18.6188
	3	2	21621.4	8.06435
	4	2	21619.7	0.00050151
	5	2	21615.4	0.00028484
	6	1	21612.8	0.00015042
	7	1	21611.4	6.956e-05
	8	1	21610.8	2.358e-05
	9	1	21610.6	4.19e-06
	10	1	21610.6	1.9e-07
	11	1	21610.6	0
	Convergence criteria met.
	Covariance Parameter Estimates
	Cov Parm	Estimate
	rider	0.6936
	horse	7.897
	rider*horse	2.331
	exe(rider*horse)	0.91
	Residual	9.2382
	Fit Statistics
	-2 Res Log Likelihood	21610.6
	AIC (Smaller is Better)	21620.6
	AICC (Smaller is Better)	21620.6
	BIC (Smaller is Better)	21618.7
	Solution for Fixed Effects
	Effect	limb	rid	Estimate	Standard	DF	t Value	Pr > |t|
					Error
	Intercept			72.5377	1.5282	2	47.47	0.0004
	rid(limb)	inner_fore	0	8.0226	0.336	4140	23.88	<.0001
	rid(limb)	inner_fore	1	7.5173	0.3406	4140	22.07	<.0001
	rid(limb)	inner_hind	0	-1.8888	0.336	4140	-5.62	<.0001
	rid(limb)	inner_hind	1	-2.311	0.3406	4140	-6.79	<.0001
	rid(limb)	outer_fore	0	7.6771	0.336	4140	22.85	<.0001
	rid(limb)	outer_fore	1	8.1163	0.3406	4140	23.83	<.0001
	rid(limb)	outer_hind	0	1.7395	0.336	4140	5.18	<.0001
	rid(limb)	outer_hind	1	1.9609	0.3406	4140	5.76	<.0001
	rid(limb)	strai_fore	0	10.2322	0.186	4140	55.01	<.0001
	rid(limb)	strai_hind	0	0	.	.	.	.
	sd1			-14.4588	0.8926	4140	-16.2	<.0001
	Type 3 Tests of Fixed Effects
	Effect	Num DF	Den DF	F Value	Pr > F
	rid(limb)	9	4140	1015.49	<.0001
	sd1	1	4140	262.41	<.0001
	Least Squares Means
	Effect	limb	rid	Estimate	Standard	DF	t Value	Pr > |t|
					Error
	rid(limb)	inner_fore	0	62.589	1.0953	4140	57.14	<.0001
	rid(limb)	inner_fore	1	62.0837	1.0974	4140	56.57	<.0001
	rid(limb)	inner_hind	0	52.6776	1.0953	4140	48.09	<.0001
	rid(limb)	inner_hind	1	52.2554	1.0974	4140	47.62	<.0001
	rid(limb)	outer_fore	0	62.2435	1.0953	4140	56.83	<.0001
	rid(limb)	outer_fore	1	62.6827	1.0974	4140	57.12	<.0001
	rid(limb)	outer_hind	0	56.3059	1.0953	4140	51.41	<.0001
	rid(limb)	outer_hind	1	56.5273	1.0974	4140	51.51	<.0001
	rid(limb)	strai_fore	0	64.7986	1.0932	4140	59.27	<.0001
	rid(limb)	strai_hind	0	54.5664	1.0932	4140	49.91	<.0001
	Differences of Least Squares Means
	Effect	limb	rid	_limb	_rid	Estimate	Standard	DF	t Value	Pr > |t|
							Error
	rid(limb)	inner_fore	0	inner_fore	1	0.5054	0.3415	4140	1.48	0.139
	rid(limb)	inner_fore	0	inner_hind	0	9.9114	0.2063	4140	48.04	<.0001
	rid(limb)	inner_fore	0	inner_hind	1	10.3337	0.3415	4140	30.26	<.0001
	rid(limb)	inner_fore	0	outer_fore	0	0.3456	0.2063	4140	1.67	0.094
	rid(limb)	inner_fore	0	outer_fore	1	-0.09368	0.3415	4140	-0.27	0.7839
	rid(limb)	inner_fore	0	outer_hind	0	6.2831	0.2063	4140	30.45	<.0001
	rid(limb)	inner_fore	0	outer_hind	1	6.0617	0.3415	4140	17.75	<.0001
	rid(limb)	inner_fore	0	strai_fore	0	-2.2096	0.336	4140	-6.58	<.0001
	rid(limb)	inner_fore	0	strai_hind	0	8.0226	0.336	4140	23.88	<.0001
	rid(limb)	inner_fore	1	inner_hind	0	9.4061	0.3415	4140	27.54	<.0001
	rid(limb)	inner_fore	1	inner_hind	1	9.8283	0.2275	4140	43.2	<.0001
	rid(limb)	inner_fore	1	outer_fore	0	-0.1598	0.3415	4140	-0.47	0.6399
	rid(limb)	inner_fore	1	outer_fore	1	-0.599	0.2275	4140	-2.63	0.0085
	rid(limb)	inner_fore	1	outer_hind	0	5.7777	0.3415	4140	16.92	<.0001
	rid(limb)	inner_fore	1	outer_hind	1	5.5563	0.2275	4140	24.42	<.0001
	rid(limb)	inner_fore	1	strai_fore	0	-2.7149	0.3406	4140	-7.97	<.0001
	rid(limb)	inner_fore	1	strai_hind	0	7.5173	0.3406	4140	22.07	<.0001
	rid(limb)	inner_hind	0	inner_hind	1	0.4222	0.3415	4140	1.24	0.2165
	rid(limb)	inner_hind	0	outer_fore	0	-9.5659	0.2063	4140	-46.36	<.0001
	rid(limb)	inner_hind	0	outer_fore	1	-10.0051	0.3415	4140	-29.29	<.0001
	rid(limb)	inner_hind	0	outer_hind	0	-3.6283	0.2063	4140	-17.59	<.0001
	rid(limb)	inner_hind	0	outer_hind	1	-3.8497	0.3415	4140	-11.27	<.0001
	rid(limb)	inner_hind	0	strai_fore	0	-12.121	0.336	4140	-36.08	<.0001
	rid(limb)	inner_hind	0	strai_hind	0	-1.8888	0.336	4140	-5.62	<.0001
	rid(limb)	inner_hind	1	outer_fore	0	-9.9881	0.3415	4140	-29.24	<.0001
	rid(limb)	inner_hind	1	outer_fore	1	-10.4273	0.2275	4140	-45.84	<.0001
	rid(limb)	inner_hind	1	outer_hind	0	-4.0506	0.3415	4140	-11.86	<.0001
	rid(limb)	inner_hind	1	outer_hind	1	-4.2719	0.2275	4140	-18.78	<.0001
	rid(limb)	inner_hind	1	strai_fore	0	-12.5432	0.3406	4140	-36.83	<.0001
	rid(limb)	inner_hind	1	strai_hind	0	-2.311	0.3406	4140	-6.79	<.0001
	rid(limb)	outer_fore	0	outer_fore	1	-0.4393	0.3415	4140	-1.29	0.1985
	rid(limb)	outer_fore	0	outer_hind	0	5.9375	0.2063	4140	28.78	<.0001
	rid(limb)	outer_fore	0	outer_hind	1	5.7161	0.3415	4140	16.74	<.0001
	rid(limb)	outer_fore	0	strai_fore	0	-2.5552	0.336	4140	-7.61	<.0001
	rid(limb)	outer_fore	0	strai_hind	0	7.6771	0.336	4140	22.85	<.0001
	rid(limb)	outer_fore	1	outer_hind	0	6.3768	0.3415	4140	18.67	<.0001
	rid(limb)	outer_fore	1	outer_hind	1	6.1554	0.2275	4140	27.06	<.0001
	rid(limb)	outer_fore	1	strai_fore	0	-2.1159	0.3406	4140	-6.21	<.0001
	rid(limb)	outer_fore	1	strai_hind	0	8.1163	0.3406	4140	23.83	<.0001
	rid(limb)	outer_hind	0	outer_hind	1	-0.2214	0.3415	4140	-0.65	0.5169
	rid(limb)	outer_hind	0	strai_fore	0	-8.4927	0.336	4140	-25.28	<.0001
	rid(limb)	outer_hind	0	strai_hind	0	1.7395	0.336	4140	5.18	<.0001
	rid(limb)	outer_hind	1	strai_fore	0	-8.2713	0.3406	4140	-24.29	<.0001
	rid(limb)	outer_hind	1	strai_hind	0	1.9609	0.3406	4140	5.76	<.0001
	rid(limb)	strai_fore	0	strai_hind	0	10.2322	0.186	4140	55.01	<.0001
	The Mixed Procedure
	Model Information
	Data Set	WORK.LIMBSALL1
	Dependent Variable	MiPitch2
	Covariance Structure	Variance Components		timing for max retraction, adjust with 1 percentage
	Estimation Method	REML
	Residual Variance Method	Profile
	Fixed Effects SE Method	Model-Based
	Degrees of Freedom Method	Containment
	Class Level Information
	Class	Levels	Values
	h1	14	1 2 3 4 5 7 8 9 10 11 12 14 15 17
	exe	6	RLO RRO ULO URO gang gang1
	rider	5	1 2 3 4 5
	horse	10	1 2 3 4 5 6 7 8 9 10
	exe11	3	R0 U0 gang
	dir	3	L R S
	circle	2	S c
	limb	6	inner_fore inner_hind outer_fore outer_hind strai_fore strai_hind
	rid	2	0 1
	IDD	1058	1 2 3 4 5 6 7 8 9 10 11 12 13 14 15 16 17 18 19 20 21 22 23 24 25 26 27 28 29 30 31 32 33 34 35 36 37 38 39 40 41 42 43 44 45 46 47 56 57 58 59 60 61 62 63 64 65 66 67 68 69 70 71 72 73 74 75 76 77 78 79 80 81 82 83 84 85 86 87 88 89 90 91 92 93 94 95 96 97 98 99 100 101 102 103 104 105 106 107 108 109 110 111 112 113 114 115 116 117 118 119 120 121 122 123 124 125 126 127 128 129 130 131 132 133…
	Dimensions
	Covariance Parameters	5
	Columns in X	12
	Columns in Z	113
	Subjects	1
	Max Obs per Subject	4015
	Number of Observations
	Number of Observations Read	4015
	Number of Observations Used	4015
	Number of Observations Not Used	0
	Iteration History
	Iteration	Evaluations	-2 Res Log Like	Criterion
	0	1	18740.9
	1	4	17387.5	.
	2	1	17383.9	9.908e-05
	3	1	17383.3	4.08e-06
	4	1	17383.3	1e-08
	5	1	17383.3	0
	Convergence criteria met.
	Estimated G matrix is not positive definite.
	Covariance Parameter Estimates
	Cov Parm	Estimate
	rider	0
	horse	0.3762
	rider*horse	0
	exe(rider*horse)	2.3467
	Residual	4.1476
	Fit Statistics
	-2 Res Log Likelihood	17383.3
	AIC (Smaller is Better)	17389.3
	AICC (Smaller is Better)	17389.3
	BIC (Smaller is Better)	17388.2
	Solution for Fixed Effects
	Effect	limb	rid	Estimate	Standard	DF	t Value	Pr > |t|
					Error
	Intercept			-2.1407	0.8567	2	-2.5	0.1297
	rid(limb)	inner_fore	0	28.5528	0.4417	3923	64.65	<.0001
	rid(limb)	inner_fore	1	29.1659	0.4428	3923	65.87	<.0001
	rid(limb)	inner_hind	0	0.578	0.4413	3923	1.31	0.1904
	rid(limb)	inner_hind	1	0.5749	0.4428	3923	1.3	0.1943
	rid(limb)	outer_fore	0	29.3453	0.4416	3923	66.45	<.0001
	rid(limb)	outer_fore	1	30.0173	0.4432	3923	67.72	<.0001
	rid(limb)	outer_hind	0	-1.7446	0.4413	3923	-3.95	<.0001
	rid(limb)	outer_hind	1	-1.6016	0.4428	3923	-3.62	0.0003
	rid(limb)	strai_fore	0	28.982	0.1427	3923	203.03	<.0001
	rid(limb)	strai_hind	0	0	.	.	.	.
	sd1			1.7856	0.6482	3923	2.75	0.0059
	Type 3 Tests of Fixed Effects
	Effect	Num DF	Den DF	F Value	Pr > F
	rid(limb)	9	3923	23316.1	<.0001
	sd1	1	3923	7.59	0.0059
	Least Squares Means
	Effect	limb	rid	Estimate	Standard	DF	t Value	Pr > |t|
					Error
	rid(limb)	inner_fore	0	28.6353	0.3673	3923	77.96	<.0001
	rid(limb)	inner_fore	1	29.2484	0.3697	3923	79.11	<.0001
	rid(limb)	inner_hind	0	0.6605	0.3668	3923	1.8	0.0719
	rid(limb)	inner_hind	1	0.6574	0.3697	3923	1.78	0.0755
	rid(limb)	outer_fore	0	29.4278	0.3672	3923	80.13	<.0001
	rid(limb)	outer_fore	1	30.0999	0.3703	3923	81.29	<.0001
	rid(limb)	outer_hind	0	-1.6621	0.3668	3923	-4.53	<.0001
	rid(limb)	outer_hind	1	-1.5191	0.3697	3923	-4.11	<.0001
	rid(limb)	strai_fore	0	29.0645	0.365	3923	79.64	<.0001
	rid(limb)	strai_hind	0	0.08252	0.371	3923	0.22	0.824
	Differences of Least Squares Means
	Effect	limb	rid	_limb	_rid	Estimate	Standard	DF	t Value	Pr > |t|
							Error
	rid(limb)	inner_fore	0	inner_fore	1	-0.6131	0.4376	3923	-1.4	0.1613
	rid(limb)	inner_fore	0	inner_hind	0	27.9748	0.1393	3923	200.87	<.0001
	rid(limb)	inner_fore	0	inner_hind	1	27.9779	0.4376	3923	63.93	<.0001
	rid(limb)	inner_fore	0	outer_fore	0	-0.7925	0.1397	3923	-5.67	<.0001
	rid(limb)	inner_fore	0	outer_fore	1	-1.4645	0.4381	3923	-3.34	0.0008
	rid(limb)	inner_fore	0	outer_hind	0	30.2974	0.1393	3923	217.55	<.0001
	rid(limb)	inner_fore	0	outer_hind	1	30.1544	0.4376	3923	68.9	<.0001
	rid(limb)	inner_fore	0	strai_fore	0	-0.4292	0.4366	3923	-0.98	0.3257
	rid(limb)	inner_fore	0	strai_hind	0	28.5528	0.4417	3923	64.65	<.0001
	rid(limb)	inner_fore	1	inner_hind	0	28.5879	0.4373	3923	65.38	<.0001
	rid(limb)	inner_fore	1	inner_hind	1	28.591	0.1524	3923	187.56	<.0001
	rid(limb)	inner_fore	1	outer_fore	0	-0.1794	0.4376	3923	-0.41	0.6819
	rid(limb)	inner_fore	1	outer_fore	1	-0.8514	0.1531	3923	-5.56	<.0001
	rid(limb)	inner_fore	1	outer_hind	0	30.9105	0.4373	3923	70.69	<.0001
	rid(limb)	inner_fore	1	outer_hind	1	30.7675	0.1524	3923	201.84	<.0001
	rid(limb)	inner_fore	1	strai_fore	0	0.1839	0.4378	3923	0.42	0.6744
	rid(limb)	inner_fore	1	strai_hind	0	29.1659	0.4428	3923	65.87	<.0001
	rid(limb)	inner_hind	0	inner_hind	1	0.003091	0.4373	3923	0.01	0.9944
	rid(limb)	inner_hind	0	outer_fore	0	-28.7673	0.1387	3923	-207.46	<.0001
	rid(limb)	inner_hind	0	outer_fore	1	-29.4394	0.4377	3923	-67.26	<.0001
	rid(limb)	inner_hind	0	outer_hind	0	2.3226	0.1383	3923	16.8	<.0001
	rid(limb)	inner_hind	0	outer_hind	1	2.1796	0.4373	3923	4.98	<.0001
	rid(limb)	inner_hind	0	strai_fore	0	-28.404	0.4362	3923	-65.11	<.0001
	rid(limb)	inner_hind	0	strai_hind	0	0.578	0.4413	3923	1.31	0.1904
	rid(limb)	inner_hind	1	outer_fore	0	-28.7704	0.4376	3923	-65.75	<.0001
	rid(limb)	inner_hind	1	outer_fore	1	-29.4425	0.1531	3923	-192.26	<.0001
	rid(limb)	inner_hind	1	outer_hind	0	2.3195	0.4373	3923	5.3	<.0001
	rid(limb)	inner_hind	1	outer_hind	1	2.1765	0.1524	3923	14.28	<.0001
	rid(limb)	inner_hind	1	strai_fore	0	-28.4071	0.4378	3923	-64.89	<.0001
	rid(limb)	inner_hind	1	strai_hind	0	0.5749	0.4428	3923	1.3	0.1943
	rid(limb)	outer_fore	0	outer_fore	1	-0.6721	0.438	3923	-1.53	0.125
	rid(limb)	outer_fore	0	outer_hind	0	31.0899	0.1387	3923	224.2	<.0001
	rid(limb)	outer_fore	0	outer_hind	1	30.9469	0.4376	3923	70.72	<.0001
	rid(limb)	outer_fore	0	strai_fore	0	0.3633	0.4366	3923	0.83	0.4054
	rid(limb)	outer_fore	0	strai_hind	0	29.3453	0.4416	3923	66.45	<.0001
	rid(limb)	outer_fore	1	outer_hind	0	31.762	0.4377	3923	72.57	<.0001
	rid(limb)	outer_fore	1	outer_hind	1	31.6189	0.1531	3923	206.48	<.0001
	rid(limb)	outer_fore	1	strai_fore	0	1.0353	0.4382	3923	2.36	0.0182
	rid(limb)	outer_fore	1	strai_hind	0	30.0173	0.4432	3923	67.72	<.0001
	rid(limb)	outer_hind	0	outer_hind	1	-0.143	0.4373	3923	-0.33	0.7436
	rid(limb)	outer_hind	0	strai_fore	0	-30.7266	0.4362	3923	-70.43	<.0001
	rid(limb)	outer_hind	0	strai_hind	0	-1.7446	0.4413	3923	-3.95	<.0001
	rid(limb)	outer_hind	1	strai_fore	0	-30.5836	0.4378	3923	-69.86	<.0001
	rid(limb)	outer_hind	1	strai_hind	0	-1.6016	0.4428	3923	-3.62	0.0003
	rid(limb)	strai_fore	0	strai_hind	0	28.982	0.1427	3923	203.03	<.0001
	The SAS System
	The Mixed Procedure
	Model Information
	Data Set	WORK.LIMBSALL2
	Dependent Variable	MaPitch2		timing for max retraction, adjust with 1 percentage
	Covariance Structure	Variance Components
	Estimation Method	REML
	Residual Variance Method	Profile
	Fixed Effects SE Method	Model-Based
	Degrees of Freedom Method	Containment
	Class Level Information
	Class	Levels	Values
	h1	14	1 2 3 4 5 7 8 9 10 11 12 14 15 17
	exe	6	RLO RRO ULO URO gang gang1
	rider	5	1 2 3 4 5
	horse	10	1 2 3 4 5 6 7 8 9 10
	exe11	3	R0 U0 gang
	dir	3	L R S
	circle	2	S c
	limb	6	inner_fore inner_hind outer_fore outer_hind strai_fore strai_hind
	rid	2	0 1
	IDD	1058	1 2 3 4 5 6 7 8 9 10 11 12 13 14 15 16 17 18 19 20 21 22 23 24 25 26 27 28 29 30 31 32 33 34 35 36 37 38 39 40 41 42 43 44 45 46 47 56 57 58 59 60 61 62 63 64 65 66 67 68 69 70 71 72 73 74 75 76 77 78 79 80 81 82 83 84 85 86 87 88 89 90 91 92 93 94 95 96 97 98 99 100 101 102 103 104 105 106 107 108 109 110 111 112 113 114 115 116 117 118 119 120 121 122 123 124 125 126 127 128 129 130 131 132 133…
	Dimensions
	Covariance Parameters	5
	Columns in X	12
	Columns in Z	113
	Subjects	1
	Max Obs per Subject	4210
	Number of Observations
	Number of Observations Read	4210
	Number of Observations Used	4210
	Number of Observations Not Used	0
	Iteration History
	Iteration	Evaluations	-2 Res Log Like	Criterion
	0	1	21698.3
	1	4	20209.5	0.00099791
	2	1	20201.7	0.00027726
	3	1	20199.7	3.338e-05
	4	1	20199.4	6.6e-07
	5	1	20199.4	0
	Convergence criteria met.
	Estimated G matrix is not positive definite.
	Covariance Parameter Estimates
	Cov Parm	Estimate
	rider	0
	horse	1.3344
	rider*horse	0
	exe(rider*horse)	2.9147
	Residual	6.6676
	Fit Statistics
	-2 Res Log Likelihood	20199.4
	AIC (Smaller is Better)	20205.4
	AICC (Smaller is Better)	20205.4
	BIC (Smaller is Better)	20204.3
	Solution for Fixed Effects
	Effect	limb	rid	Estimate	Standard	DF	t Value	Pr > |t|
					Error
	Intercept			2.0797	1.0763	2	1.93	0.193
	rid(limb)	inner_fore	0	-13.1923	0.4949	4118	-26.66	<.0001
	rid(limb)	inner_fore	1	-12.3707	0.4964	4118	-24.92	<.0001
	rid(limb)	inner_hind	0	-0.6928	0.4942	4118	-1.4	0.161
	rid(limb)	inner_hind	1	-0.05138	0.4964	4118	-0.1	0.9176
	rid(limb)	outer_fore	0	-12.2883	0.4946	4118	-24.84	<.0001
	rid(limb)	outer_fore	1	-11.648	0.4964	4118	-23.46	<.0001
	rid(limb)	outer_hind	0	-2.554	0.4942	4118	-5.17	<.0001
	rid(limb)	outer_hind	1	-0.9972	0.4965	4118	-2.01	0.0447
	rid(limb)	strai_fore	0	-11.3697	0.1583	4118	-71.81	<.0001
	rid(limb)	strai_hind	0	0	.	.	.	.
	sd1			11.5106	0.7986	4118	14.41	<.0001
	Type 3 Tests of Fixed Effects
	Effect	Num DF	Den DF	F Value	Pr > F
	rid(limb)	9	4118	2259.41	<.0001
	sd1	1	4118	207.75	<.0001
	Least Squares Means
	Effect	limb	rid	Estimate	Standard	DF	t Value	Pr > |t|
					Error
	rid(limb)	inner_fore	0	3.1912	0.5096	4118	6.26	<.0001
	rid(limb)	inner_fore	1	4.0127	0.5122	4118	7.83	<.0001
	rid(limb)	inner_hind	0	15.6906	0.5089	4118	30.83	<.0001
	rid(limb)	inner_hind	1	16.332	0.5122	4118	31.89	<.0001
	rid(limb)	outer_fore	0	4.0952	0.5094	4118	8.04	<.0001
	rid(limb)	outer_fore	1	4.7354	0.5122	4118	9.25	<.0001
	rid(limb)	outer_hind	0	13.8294	0.509	4118	27.17	<.0001
	rid(limb)	outer_hind	1	15.3862	0.5123	4118	30.03	<.0001
	rid(limb)	strai_fore	0	5.0137	0.5062	4118	9.9	<.0001
	rid(limb)	strai_hind	0	16.3834	0.5063	4118	32.36	<.0001
	Differences of Least Squares Means
	Effect	limb	rid	_limb	_rid	Estimate	Standard	DF	t Value	Pr > |t|
							Error
	rid(limb)	inner_fore	0	inner_fore	1	-0.8216	0.4967	4118	-1.65	0.0982
	rid(limb)	inner_fore	0	inner_hind	0	-12.4994	0.1769	4118	-70.65	<.0001
	rid(limb)	inner_fore	0	inner_hind	1	-13.1409	0.4967	4118	-26.46	<.0001
	rid(limb)	inner_fore	0	outer_fore	0	-0.904	0.1774	4118	-5.09	<.0001
	rid(limb)	inner_fore	0	outer_fore	1	-1.5442	0.4967	4118	-3.11	0.0019
	rid(limb)	inner_fore	0	outer_hind	0	-10.6382	0.177	4118	-60.09	<.0001
	rid(limb)	inner_fore	0	outer_hind	1	-12.195	0.4968	4118	-24.55	<.0001
	rid(limb)	inner_fore	0	strai_fore	0	-1.8226	0.4947	4118	-3.68	0.0002
	rid(limb)	inner_fore	0	strai_hind	0	-13.1923	0.4949	4118	-26.66	<.0001
	rid(limb)	inner_fore	1	inner_hind	0	-11.6779	0.496	4118	-23.54	<.0001
	rid(limb)	inner_fore	1	inner_hind	1	-12.3193	0.1933	4118	-63.74	<.0001
	rid(limb)	inner_fore	1	outer_fore	0	-0.08246	0.4964	4118	-0.17	0.8681
	rid(limb)	inner_fore	1	outer_fore	1	-0.7227	0.1933	4118	-3.74	0.0002
	rid(limb)	inner_fore	1	outer_hind	0	-9.8167	0.4961	4118	-19.79	<.0001
	rid(limb)	inner_fore	1	outer_hind	1	-11.3735	0.1934	4118	-58.8	<.0001
	rid(limb)	inner_fore	1	strai_fore	0	-1.001	0.4963	4118	-2.02	0.0437
	rid(limb)	inner_fore	1	strai_hind	0	-12.3707	0.4964	4118	-24.92	<.0001
	rid(limb)	inner_hind	0	inner_hind	1	-0.6414	0.496	4118	-1.29	0.196
	rid(limb)	inner_hind	0	outer_fore	0	11.5954	0.1758	4118	65.95	<.0001
	rid(limb)	inner_hind	0	outer_fore	1	10.9552	0.496	4118	22.09	<.0001
	rid(limb)	inner_hind	0	outer_hind	0	1.8612	0.1754	4118	10.61	<.0001
	rid(limb)	inner_hind	0	outer_hind	1	0.3044	0.4961	4118	0.61	0.5395
	rid(limb)	inner_hind	0	strai_fore	0	10.6769	0.494	4118	21.61	<.0001
	rid(limb)	inner_hind	0	strai_hind	0	-0.6928	0.4942	4118	-1.4	0.161
	rid(limb)	inner_hind	1	outer_fore	0	12.2369	0.4964	4118	24.65	<.0001
	rid(limb)	inner_hind	1	outer_fore	1	11.5966	0.1933	4118	60	<.0001
	rid(limb)	inner_hind	1	outer_hind	0	2.5026	0.4961	4118	5.05	<.0001
	rid(limb)	inner_hind	1	outer_hind	1	0.9458	0.1934	4118	4.89	<.0001
	rid(limb)	inner_hind	1	strai_fore	0	11.3183	0.4963	4118	22.81	<.0001
	rid(limb)	inner_hind	1	strai_hind	0	-0.05138	0.4964	4118	-0.1	0.9176
	rid(limb)	outer_fore	0	outer_fore	1	-0.6402	0.4964	4118	-1.29	0.1972
	rid(limb)	outer_fore	0	outer_hind	0	-9.7342	0.1759	4118	-55.33	<.0001
	rid(limb)	outer_fore	0	outer_hind	1	-11.291	0.4965	4118	-22.74	<.0001
	rid(limb)	outer_fore	0	strai_fore	0	-0.9186	0.4945	4118	-1.86	0.0633
	rid(limb)	outer_fore	0	strai_hind	0	-12.2883	0.4946	4118	-24.84	<.0001
	rid(limb)	outer_fore	1	outer_hind	0	-9.094	0.4961	4118	-18.33	<.0001
	rid(limb)	outer_fore	1	outer_hind	1	-10.6508	0.1934	4118	-55.07	<.0001
	rid(limb)	outer_fore	1	strai_fore	0	-0.2783	0.4963	4118	-0.56	0.5749
	rid(limb)	outer_fore	1	strai_hind	0	-11.648	0.4964	4118	-23.46	<.0001
	rid(limb)	outer_hind	0	outer_hind	1	-1.5568	0.4962	4118	-3.14	0.0017
	rid(limb)	outer_hind	0	strai_fore	0	8.8157	0.4941	4118	17.84	<.0001
	rid(limb)	outer_hind	0	strai_hind	0	-2.554	0.4942	4118	-5.17	<.0001
	rid(limb)	outer_hind	1	strai_fore	0	10.3725	0.4964	4118	20.9	<.0001
	rid(limb)	outer_hind	1	strai_hind	0	-0.9972	0.4965	4118	-2.01	0.0447
	rid(limb)	strai_fore	0	strai_hind	0	-11.3697	0.1583	4118	-71.81	<.0001
	The SAS System
	The Mixed Procedure
	Model Information
	Data Set	WORK.LIMBSALL
	Dependent Variable	minPitch		max protraction, change sign
	Covariance Structure	Variance Components
	Estimation Method	REML
	Residual Variance Method	Profile
	Fixed Effects SE Method	Model-Based
	Degrees of Freedom Method	Containment
	Class Level Information
	Class	Levels	Values
	h1	14	1 2 3 4 5 7 8 9 10 11 12 14 15 17
	exe	6	RLO RRO ULO URO gang gang1
	rider	5	1 2 3 4 5
	horse	10	1 2 3 4 5 6 7 8 9 10
	exe11	3	R0 U0 gang
	dir	3	L R S
	circle	2	S c
	limb	6	inner_fore inner_hind outer_fore outer_hind strai_fore strai_hind
	rid	2	0 1
	IDD	1058	1 2 3 4 5 6 7 8 9 10 11 12 13 14 15 16 17 18 19 20 21 22 23 24 25 26 27 28 29 30 31 32 33 34 35 36 37 38 39 40 41 42 43 44 45 46 47 56 57 58 59 60 61 62 63 64 65 66 67 68 69 70 71 72 73 74 75 76 77 78 79 80 81 82 83 84 85 86 87 88 89 90 91 92 93 94 95 96 97 98 99 100 101 102 103 104 105 106 107 108 109 110 111 112 113 114 115 116 117 118 119 120 121 122 123 124 125 126 127 128 129 130 131 132 133…
	side	2	left right
	Dimensions
	Covariance Parameters	6
	Columns in X	12
	Columns in Z	281
	Subjects	1
	Max Obs per Subject	4232
	Number of Observations
	Number of Observations Read	4232
	Number of Observations Used	4232
	Number of Observations Not Used	0
	Iteration History
	Iteration	Evaluations	-2 Res Log Like	Criterion
	0	1	25907.2
	1	3	23378	7.782e-05
	2	2	23377.8	2.47e-06
	3	1	23377.7	4e-08
	4	1	23377.7	0
	Convergence criteria met.
	Covariance Parameter Estimates
	Cov Parm	Estimate
	rider	0.8705
	horse	5.2748
	rider*horse	2.1508
	exe(rider*horse)	0
	exe(ride*horse*side)	6.2277
	Residual	13.2636
	Fit Statistics
	-2 Res Log Likelihood	23377.7
	AIC (Smaller is Better)	23387.7
	AICC (Smaller is Better)	23387.8
	BIC (Smaller is Better)	23385.8
	Solution for Fixed Effects
	Effect	limb	rid	Estimate	Standard	DF	t Value	Pr > |t|
					Error
	Intercept			-40.7205	1.678	2	-24.27	0.0017
	rid(limb)	inner_fore	0	15.5783	0.6376	4058	24.43	<.0001
	rid(limb)	inner_fore	1	16.1591	0.6425	4058	25.15	<.0001
	rid(limb)	inner_hind	0	-0.9103	0.6376	4058	-1.43	0.1535
	rid(limb)	inner_hind	1	-0.4131	0.6425	4058	-0.64	0.5203
	rid(limb)	outer_fore	0	15.2514	0.6376	4058	23.92	<.0001
	rid(limb)	outer_fore	1	16.246	0.6425	4058	25.29	<.0001
	rid(limb)	outer_hind	0	-2.0242	0.6376	4058	-3.17	0.0015
	rid(limb)	outer_hind	1	-2.4349	0.6425	4058	-3.79	0.0002
	rid(limb)	strai_fore	0	15.1382	0.2229	4058	67.92	<.0001
	rid(limb)	strai_hind	0	0	.	.	.	.
	sd1			3.3892	1.1113	4058	3.05	0.0023
	Type 3 Tests of Fixed Effects
	Effect	Num DF	Den DF	F Value	Pr > F
	rid(limb)	9	4058	2482.32	<.0001
	sd1	1	4058	9.3	0.0023
	Least Squares Means
	Effect	limb	rid	Estimate	Standard	DF	t Value	Pr > |t|
					Error
	rid(limb)	inner_fore	0	-20.9297	1.0811	4058	-19.36	<.0001
	rid(limb)	inner_fore	1	-20.3488	1.0849	4058	-18.76	<.0001
	rid(limb)	inner_hind	0	-37.4182	1.0811	4058	-34.61	<.0001
	rid(limb)	inner_hind	1	-36.921	1.0849	4058	-34.03	<.0001
	rid(limb)	outer_fore	0	-21.2565	1.0811	4058	-19.66	<.0001
	rid(limb)	outer_fore	1	-20.2619	1.0849	4058	-18.68	<.0001
	rid(limb)	outer_hind	0	-38.5321	1.0811	4058	-35.64	<.0001
	rid(limb)	outer_hind	1	-38.9428	1.0849	4058	-35.89	<.0001
	rid(limb)	strai_fore	0	-21.3697	1.024	4058	-20.87	<.0001
	rid(limb)	strai_hind	0	-36.5079	1.024	4058	-35.65	<.0001
	Differences of Least Squares Means
	Effect	limb	rid	_limb	_rid	Estimate	Standard	DF	t Value	Pr > |t|
							Error
	rid(limb)	inner_fore	0	inner_fore	1	-0.5809	0.7254	4058	-0.8	0.4233
	rid(limb)	inner_fore	0	inner_hind	0	16.4886	0.2472	4058	66.69	<.0001
	rid(limb)	inner_fore	0	inner_hind	1	15.9913	0.7254	4058	22.04	<.0001
	rid(limb)	inner_fore	0	outer_fore	0	0.3268	0.7181	4058	0.46	0.649
	rid(limb)	inner_fore	0	outer_fore	1	-0.6678	0.7254	4058	-0.92	0.3573
	rid(limb)	inner_fore	0	outer_hind	0	17.6025	0.7181	4058	24.51	<.0001
	rid(limb)	inner_fore	0	outer_hind	1	18.0131	0.7254	4058	24.83	<.0001
	rid(limb)	inner_fore	0	strai_fore	0	0.44	0.6376	4058	0.69	0.4902
	rid(limb)	inner_fore	0	strai_hind	0	15.5783	0.6376	4058	24.43	<.0001
	rid(limb)	inner_fore	1	inner_hind	0	17.0695	0.7254	4058	23.53	<.0001
	rid(limb)	inner_fore	1	inner_hind	1	16.5722	0.2726	4058	60.8	<.0001
	rid(limb)	inner_fore	1	outer_fore	0	0.9077	0.7254	4058	1.25	0.2109
	rid(limb)	inner_fore	1	outer_fore	1	-0.08689	0.732	4058	-0.12	0.9055
	rid(limb)	inner_fore	1	outer_hind	0	18.1833	0.7254	4058	25.07	<.0001
	rid(limb)	inner_fore	1	outer_hind	1	18.594	0.732	4058	25.4	<.0001
	rid(limb)	inner_fore	1	strai_fore	0	1.0209	0.6425	4058	1.59	0.1121
	rid(limb)	inner_fore	1	strai_hind	0	16.1591	0.6425	4058	25.15	<.0001
	rid(limb)	inner_hind	0	inner_hind	1	-0.4973	0.7254	4058	-0.69	0.4931
	rid(limb)	inner_hind	0	outer_fore	0	-16.1617	0.7181	4058	-22.51	<.0001
	rid(limb)	inner_hind	0	outer_fore	1	-17.1564	0.7254	4058	-23.65	<.0001
	rid(limb)	inner_hind	0	outer_hind	0	1.1139	0.7181	4058	1.55	0.121
	rid(limb)	inner_hind	0	outer_hind	1	1.5246	0.7254	4058	2.1	0.0357
	rid(limb)	inner_hind	0	strai_fore	0	-16.0486	0.6376	4058	-25.17	<.0001
	rid(limb)	inner_hind	0	strai_hind	0	-0.9103	0.6376	4058	-1.43	0.1535
	rid(limb)	inner_hind	1	outer_fore	0	-15.6645	0.7254	4058	-21.59	<.0001
	rid(limb)	inner_hind	1	outer_fore	1	-16.6591	0.732	4058	-22.76	<.0001
	rid(limb)	inner_hind	1	outer_hind	0	1.6111	0.7254	4058	2.22	0.0264
	rid(limb)	inner_hind	1	outer_hind	1	2.0218	0.732	4058	2.76	0.0058
	rid(limb)	inner_hind	1	strai_fore	0	-15.5513	0.6425	4058	-24.2	<.0001
	rid(limb)	inner_hind	1	strai_hind	0	-0.4131	0.6425	4058	-0.64	0.5203
	rid(limb)	outer_fore	0	outer_fore	1	-0.9946	0.7254	4058	-1.37	0.1704
	rid(limb)	outer_fore	0	outer_hind	0	17.2756	0.2472	4058	69.88	<.0001
	rid(limb)	outer_fore	0	outer_hind	1	17.6863	0.7254	4058	24.38	<.0001
	rid(limb)	outer_fore	0	strai_fore	0	0.1132	0.6376	4058	0.18	0.8591
	rid(limb)	outer_fore	0	strai_hind	0	15.2514	0.6376	4058	23.92	<.0001
	rid(limb)	outer_fore	1	outer_hind	0	18.2702	0.7254	4058	25.19	<.0001
	rid(limb)	outer_fore	1	outer_hind	1	18.6809	0.2726	4058	68.53	<.0001
	rid(limb)	outer_fore	1	strai_fore	0	1.1078	0.6425	4058	1.72	0.0847
	rid(limb)	outer_fore	1	strai_hind	0	16.246	0.6425	4058	25.29	<.0001
	rid(limb)	outer_hind	0	outer_hind	1	0.4107	0.7254	4058	0.57	0.5713
	rid(limb)	outer_hind	0	strai_fore	0	-17.1624	0.6376	4058	-26.92	<.0001
	rid(limb)	outer_hind	0	strai_hind	0	-2.0242	0.6376	4058	-3.17	0.0015
	rid(limb)	outer_hind	1	strai_fore	0	-17.5731	0.6425	4058	-27.35	<.0001
	rid(limb)	outer_hind	1	strai_hind	0	-2.4349	0.6425	4058	-3.79	0.0002
	rid(limb)	strai_fore	0	strai_hind	0	15.1382	0.2229	4058	67.92	<.0001
	The SAS System
	The Mixed Procedure
	Model Information
	Data Set	WORK.LIMBSALL
	Dependent Variable	maxPitch		max retraction , change sign
	Covariance Structure	Variance Components
	Estimation Method	REML
	Residual Variance Method	Profile
	Fixed Effects SE Method	Model-Based
	Degrees of Freedom Method	Containment
	Class Level Information
	Class	Levels	Values
	h1	14	1 2 3 4 5 7 8 9 10 11 12 14 15 17
	exe	6	RLO RRO ULO URO gang gang1
	rider	5	1 2 3 4 5
	horse	10	1 2 3 4 5 6 7 8 9 10
	exe11	3	R0 U0 gang
	dir	3	L R S
	circle	2	S c
	limb	6	inner_fore inner_hind outer_fore outer_hind strai_fore strai_hind
	rid	2	0 1
	IDD	1058	1 2 3 4 5 6 7 8 9 10 11 12 13 14 15 16 17 18 19 20 21 22 23 24 25 26 27 28 29 30 31 32 33 34 35 36 37 38 39 40 41 42 43 44 45 46 47 56 57 58 59 60 61 62 63 64 65 66 67 68 69 70 71 72 73 74 75 76 77 78 79 80 81 82 83 84 85 86 87 88 89 90 91 92 93 94 95 96 97 98 99 100 101 102 103 104 105 106 107 108 109 110 111 112 113 114 115 116 117 118 119 120 121 122 123 124 125 126 127 128 129 130 131 132 133…
	side	2	left right
	Dimensions
	Covariance Parameters	6
	Columns in X	12
	Columns in Z	281
	Subjects	1
	Max Obs per Subject	4232
	Number of Observations
	Number of Observations Read	4232
	Number of Observations Used	4232
	Number of Observations Not Used	0
	Iteration History
	Iteration	Evaluations	-2 Res Log Like	Criterion
	0	1	25039.1
	1	3	22539.4	0.00095991
	2	2	22538.5	0.00010559
	3	2	22538.1	.
	4	1	22537.9	1.31e-06
	5	1	22537.9	1e-08
	Convergence criteria met.
	Covariance Parameter Estimates
	Cov Parm	Estimate
	rider	0
	horse	8.8698
	rider*horse	1.1958
	exe(rider*horse)	0
	exe(ride*horse*side)	4.9467
	Residual	10.8765
	Fit Statistics
	-2 Res Log Likelihood	22537.9
	AIC (Smaller is Better)	22545.9
	AICC (Smaller is Better)	22545.9
	BIC (Smaller is Better)	22544.4
	Solution for Fixed Effects
	Effect	limb	rid	Estimate	Standard	DF	t Value	Pr > |t|
					Error
	Intercept			31.4333	1.5904	2	19.76	0.0026
	rid(limb)	inner_fore	0	23.4718	0.5699	4058	41.19	<.0001
	rid(limb)	inner_fore	1	23.8429	0.5743	4058	41.51	<.0001
	rid(limb)	inner_hind	0	-2.9282	0.5699	4058	-5.14	<.0001
	rid(limb)	inner_hind	1	-2.5576	0.5743	4058	-4.45	<.0001
	rid(limb)	outer_fore	0	23.0219	0.5699	4058	40.4	<.0001
	rid(limb)	outer_fore	1	24.1303	0.5743	4058	42.02	<.0001
	rid(limb)	outer_hind	0	-0.1913	0.5699	4058	-0.34	0.7372
	rid(limb)	outer_hind	1	-0.706	0.5743	4058	-1.23	0.2191
	rid(limb)	strai_fore	0	25.3705	0.2018	4058	125.7	<.0001
	rid(limb)	strai_hind	0	0	.	.	.	.
	sd1			-10.8907	1.0048	4058	-10.84	<.0001
	Type 3 Tests of Fixed Effects
	Effect	Num DF	Den DF	F Value	Pr > F
	rid(limb)	9	4058	6893.72	<.0001
	sd1	1	4058	117.48	<.0001
	Least Squares Means
	Effect	limb	rid	Estimate	Standard	DF	t Value	Pr > |t|
					Error
	rid(limb)	inner_fore	0	41.3687	1.0921	4058	37.88	<.0001
	rid(limb)	inner_fore	1	41.7398	1.0953	4058	38.11	<.0001
	rid(limb)	inner_hind	0	14.9687	1.0921	4058	13.71	<.0001
	rid(limb)	inner_hind	1	15.3393	1.0953	4058	14.01	<.0001
	rid(limb)	outer_fore	0	40.9188	1.0921	4058	37.47	<.0001
	rid(limb)	outer_fore	1	42.0273	1.0953	4058	38.37	<.0001
	rid(limb)	outer_hind	0	17.7057	1.0921	4058	16.21	<.0001
	rid(limb)	outer_hind	1	17.191	1.0953	4058	15.7	<.0001
	rid(limb)	strai_fore	0	43.2674	1.0478	4058	41.29	<.0001
	rid(limb)	strai_hind	0	17.897	1.0478	4058	17.08	<.0001
	Differences of Least Squares Means
	Effect	limb	rid	_limb	_rid	Estimate	Standard	DF	t Value	Pr > |t|
							Error
	rid(limb)	inner_fore	0	inner_fore	1	-0.3711	0.6481	4058	-0.57	0.567
	rid(limb)	inner_fore	0	inner_hind	0	26.4	0.2239	4058	117.92	<.0001
	rid(limb)	inner_fore	0	inner_hind	1	26.0294	0.6481	4058	40.16	<.0001
	rid(limb)	inner_fore	0	outer_fore	0	0.4499	0.6414	4058	0.7	0.4831
	rid(limb)	inner_fore	0	outer_fore	1	-0.6585	0.6481	4058	-1.02	0.3097
	rid(limb)	inner_fore	0	outer_hind	0	23.663	0.6414	4058	36.89	<.0001
	rid(limb)	inner_fore	0	outer_hind	1	24.1778	0.6481	4058	37.3	<.0001
	rid(limb)	inner_fore	0	strai_fore	0	-1.8987	0.5699	4058	-3.33	0.0009
	rid(limb)	inner_fore	0	strai_hind	0	23.4718	0.5699	4058	41.19	<.0001
	rid(limb)	inner_fore	1	inner_hind	0	26.7711	0.6481	4058	41.31	<.0001
	rid(limb)	inner_fore	1	inner_hind	1	26.4005	0.2468	4058	106.95	<.0001
	rid(limb)	inner_fore	1	outer_fore	0	0.821	0.6481	4058	1.27	0.2053
	rid(limb)	inner_fore	1	outer_fore	1	-0.2875	0.6541	4058	-0.44	0.6604
	rid(limb)	inner_fore	1	outer_hind	0	24.0341	0.6481	4058	37.08	<.0001
	rid(limb)	inner_fore	1	outer_hind	1	24.5489	0.6541	4058	37.53	<.0001
	rid(limb)	inner_fore	1	strai_fore	0	-1.5276	0.5743	4058	-2.66	0.0078
	rid(limb)	inner_fore	1	strai_hind	0	23.8429	0.5743	4058	41.51	<.0001
	rid(limb)	inner_hind	0	inner_hind	1	-0.3706	0.6481	4058	-0.57	0.5675
	rid(limb)	inner_hind	0	outer_fore	0	-25.9501	0.6414	4058	-40.46	<.0001
	rid(limb)	inner_hind	0	outer_fore	1	-27.0586	0.6481	4058	-41.75	<.0001
	rid(limb)	inner_hind	0	outer_hind	0	-2.737	0.6414	4058	-4.27	<.0001
	rid(limb)	inner_hind	0	outer_hind	1	-2.2223	0.6481	4058	-3.43	0.0006
	rid(limb)	inner_hind	0	strai_fore	0	-28.2987	0.5699	4058	-49.66	<.0001
	rid(limb)	inner_hind	0	strai_hind	0	-2.9282	0.5699	4058	-5.14	<.0001
	rid(limb)	inner_hind	1	outer_fore	0	-25.5795	0.6481	4058	-39.47	<.0001
	rid(limb)	inner_hind	1	outer_fore	1	-26.688	0.6541	4058	-40.8	<.0001
	rid(limb)	inner_hind	1	outer_hind	0	-2.3664	0.6481	4058	-3.65	0.0003
	rid(limb)	inner_hind	1	outer_hind	1	-1.8517	0.6541	4058	-2.83	0.0047
	rid(limb)	inner_hind	1	strai_fore	0	-27.9281	0.5743	4058	-48.63	<.0001
	rid(limb)	inner_hind	1	strai_hind	0	-2.5576	0.5743	4058	-4.45	<.0001
	rid(limb)	outer_fore	0	outer_fore	1	-1.1085	0.6481	4058	-1.71	0.0873
	rid(limb)	outer_fore	0	outer_hind	0	23.2131	0.2239	4058	103.69	<.0001
	rid(limb)	outer_fore	0	outer_hind	1	23.7278	0.6481	4058	36.61	<.0001
	rid(limb)	outer_fore	0	strai_fore	0	-2.3486	0.5699	4058	-4.12	<.0001
	rid(limb)	outer_fore	0	strai_hind	0	23.0219	0.5699	4058	40.4	<.0001
	rid(limb)	outer_fore	1	outer_hind	0	24.3216	0.6481	4058	37.53	<.0001
	rid(limb)	outer_fore	1	outer_hind	1	24.8363	0.2468	4058	100.61	<.0001
	rid(limb)	outer_fore	1	strai_fore	0	-1.2401	0.5743	4058	-2.16	0.0309
	rid(limb)	outer_fore	1	strai_hind	0	24.1303	0.5743	4058	42.02	<.0001
	rid(limb)	outer_hind	0	outer_hind	1	0.5147	0.6481	4058	0.79	0.4271
	rid(limb)	outer_hind	0	strai_fore	0	-25.5617	0.5699	4058	-44.86	<.0001
	rid(limb)	outer_hind	0	strai_hind	0	-0.1913	0.5699	4058	-0.34	0.7372
	rid(limb)	outer_hind	1	strai_fore	0	-26.0765	0.5743	4058	-45.4	<.0001
	rid(limb)	outer_hind	1	strai_hind	0	-0.706	0.5743	4058	-1.23	0.2191
	rid(limb)	strai_fore	0	strai_hind	0	25.3705	0.2018	4058	125.7	<.0001

## Sheet: mod1_data
Wither													Wither																																			Wither
rom data													mininddata																																			mindata
The SAS System																											The SAS System			Wither
																														maxinddata
Obs	h1	wiROMxxxVertT	exe11	exe	dir	circle	rid	rider	horse	fore	SD		Obs	h1	wiMinIndVertT	exe11	exe	dir	IDP	circle	rid	rider	horse	fore	hind	SD	sqrtwiMinIndVertT			Obs	h1	wiMaxIndVertT	exe11	exe	dir	IDP	circle	rid	rider	horse	fore	hind	SD	sqrtwiMaxIndVertT				Obs	h1
1	1	0.0220072	U0	ULO	L	c	0	1	1	inner_fore	1.33		1	1	79	U0	ULO	L	1	c	0	1	1	inner_fore	inner_hind	1.33	8.88819			1	1	25	U0	ULO	L	1	c	0	1	1	inner_fore	inner_hind	1.33	5				1	1
2	1	0.0256422	U0	ULO	L	c	0	1	1	inner_fore	1.39		2	1	86	U0	ULO	L	2	c	0	1	1	inner_fore	inner_hind	1.39	9.27362			2	1	34	U0	ULO	L	2	c	0	1	1	inner_fore	inner_hind	1.39	5.83095				2	1
3	1	0.0277939	U0	ULO	L	c	0	1	1	inner_fore	1.3		3	1	78	U0	ULO	L	3	c	0	1	1	inner_fore	inner_hind	1.3	8.83176			3	1	24	U0	ULO	L	3	c	0	1	1	inner_fore	inner_hind	1.3	4.89898				3	1
4	1	0.0243654	U0	ULO	L	c	0	1	1	inner_fore	1.34		4	1	87	U0	ULO	L	4	c	0	1	1	inner_fore	inner_hind	1.34	9.32738			4	1	30	U0	ULO	L	4	c	0	1	1	inner_fore	inner_hind	1.34	5.47723				4	1
5	1	0.0276115	U0	ULO	L	c	0	1	1	inner_fore	1.34		5	1	85	U0	ULO	L	5	c	0	1	1	inner_fore	inner_hind	1.34	9.21954			5	1	29	U0	ULO	L	5	c	0	1	1	inner_fore	inner_hind	1.34	5.38516				5	1
6	1	0.0244572	U0	ULO	L	c	0	1	1	inner_fore	1.34		6	1	83	U0	ULO	L	6	c	0	1	1	inner_fore	inner_hind	1.34	9.11043			6	1	29	U0	ULO	L	6	c	0	1	1	inner_fore	inner_hind	1.34	5.38516				6	1
7	1	0.0210271	U0	ULO	L	c	0	1	1	inner_fore	1.29		7	1	82	U0	ULO	L	7	c	0	1	1	inner_fore	inner_hind	1.29	9.05539			7	1	33	U0	ULO	L	7	c	0	1	1	inner_fore	inner_hind	1.29	5.74456				7	1
8	1	0.0191786	U0	ULO	L	c	0	1	1	inner_fore	1.36		8	1	92	U0	ULO	L	8	c	0	1	1	inner_fore	inner_hind	1.36	9.59166			8	1	38	U0	ULO	L	8	c	0	1	1	inner_fore	inner_hind	1.36	6.16441				8	1
9	1	0.0212812	U0	ULO	L	c	0	1	1	inner_fore	1.45		9	1	89	U0	ULO	L	9	c	0	1	1	inner_fore	inner_hind	1.45	9.43398			9	1	37	U0	ULO	L	9	c	0	1	1	inner_fore	inner_hind	1.45	6.08276				9	1
10	1	0.0236417	U0	ULO	L	c	0	1	1	inner_fore	1.31		10	1	91	U0	ULO	L	10	c	0	1	1	inner_fore	inner_hind	1.31	9.53939			10	1	31	U0	ULO	L	10	c	0	1	1	inner_fore	inner_hind	1.31	5.56776				10	1
11	1	0.0215471	U0	ULO	L	c	0	1	1	inner_fore	1.4		11	1	93	U0	ULO	L	11	c	0	1	1	inner_fore	inner_hind	1.4	9.64365			11	1	38	U0	ULO	L	11	c	0	1	1	inner_fore	inner_hind	1.4	6.16441				11	1
12	1	0.0269862	U0	ULO	L	c	0	1	1	inner_fore	1.29		12	1	88	U0	ULO	L	12	c	0	1	1	inner_fore	inner_hind	1.29	9.38083			12	1	28	U0	ULO	L	12	c	0	1	1	inner_fore	inner_hind	1.29	5.2915				12	1
13	1	0.0335156	U0	ULO	L	c	0	1	1	inner_fore	1.28		13	1	88	U0	ULO	L	13	c	0	1	1	inner_fore	inner_hind	1.28	9.38083			13	1	29	U0	ULO	L	13	c	0	1	1	inner_fore	inner_hind	1.28	5.38516				13	1
14	1	0.0244434	U0	ULO	L	c	0	1	1	inner_fore	1.31		14	1	80	U0	ULO	L	14	c	0	1	1	inner_fore	inner_hind	1.31	8.94427			14	1	28	U0	ULO	L	14	c	0	1	1	inner_fore	inner_hind	1.31	5.2915				14	1
15	2	0.0278737	U0	ULO	L	c	0	3	2	inner_fore	1.4		15	2	85	U0	ULO	L	15	c	0	3	2	inner_fore	inner_hind	1.4	9.21954			15	2	24	U0	ULO	L	15	c	0	3	2	inner_fore	inner_hind	1.4	4.89898				15	2
16	2	0.0272424	U0	ULO	L	c	0	3	2	inner_fore	1.36		16	2	70	U0	ULO	L	16	c	0	3	2	inner_fore	inner_hind	1.36	8.3666			16	2	26	U0	ULO	L	16	c	0	3	2	inner_fore	inner_hind	1.36	5.09902				16	2
17	2	0.0281823	U0	ULO	L	c	0	3	2	inner_fore	1.32		17	2	71	U0	ULO	L	17	c	0	3	2	inner_fore	inner_hind	1.32	8.42615			17	2	19	U0	ULO	L	17	c	0	3	2	inner_fore	inner_hind	1.32	4.3589				17	2
18	2	0.0206588	U0	ULO	L	c	0	3	2	inner_fore	1.38		18	2	66	U0	ULO	L	18	c	0	3	2	inner_fore	inner_hind	1.38	8.12404			18	2	23	U0	ULO	L	18	c	0	3	2	inner_fore	inner_hind	1.38	4.79583				18	2
19	2	0.0219834	U0	ULO	L	c	0	3	2	inner_fore	1.5		19	2	70	U0	ULO	L	19	c	0	3	2	inner_fore	inner_hind	1.5	8.3666			19	2	26	U0	ULO	L	19	c	0	3	2	inner_fore	inner_hind	1.5	5.09902				19	2
20	2	0.0267081	U0	ULO	L	c	0	3	2	inner_fore	1.34		20	2	71	U0	ULO	L	20	c	0	3	2	inner_fore	inner_hind	1.34	8.42615			20	2	21	U0	ULO	L	20	c	0	3	2	inner_fore	inner_hind	1.34	4.58258				20	2
21	2	0.0349981	U0	ULO	L	c	0	3	2	inner_fore	1.28		21	2	69	U0	ULO	L	21	c	0	3	2	inner_fore	inner_hind	1.28	8.30662			21	2	24	U0	ULO	L	21	c	0	3	2	inner_fore	inner_hind	1.28	4.89898				21	2
22	3	0.012826	U0	ULO	L	c	0	2	3	inner_fore	1.5		22	3	76	U0	ULO	L	22	c	0	2	3	inner_fore	inner_hind	1.5	8.7178			22	3	48	U0	ULO	L	22	c	0	2	3	inner_fore	inner_hind	1.5	6.9282				22	3
23	3	0.0212984	U0	ULO	L	c	0	2	3	inner_fore	1.55		23	3	76	U0	ULO	L	23	c	0	2	3	inner_fore	inner_hind	1.55	8.7178			23	3	39	U0	ULO	L	23	c	0	2	3	inner_fore	inner_hind	1.55	6.245				23	3
24	3	0.0185839	U0	ULO	L	c	0	2	3	inner_fore	1.51		24	3	77	U0	ULO	L	24	c	0	2	3	inner_fore	inner_hind	1.51	8.77496			24	3	30	U0	ULO	L	24	c	0	2	3	inner_fore	inner_hind	1.51	5.47723				24	3
25	3	0.0200534	U0	ULO	L	c	0	2	3	inner_fore	1.56		25	3	80	U0	ULO	L	25	c	0	2	3	inner_fore	inner_hind	1.56	8.94427			25	3	33	U0	ULO	L	25	c	0	2	3	inner_fore	inner_hind	1.56	5.74456				25	3
26	3	0.019049	U0	ULO	L	c	0	2	3	inner_fore	1.46		26	3	82	U0	ULO	L	26	c	0	2	3	inner_fore	inner_hind	1.46	9.05539			26	3	49	U0	ULO	L	26	c	0	2	3	inner_fore	inner_hind	1.46	7				26	3
27	3	0.0208101	U0	ULO	L	c	0	2	3	inner_fore	1.48		27	3	88	U0	ULO	L	27	c	0	2	3	inner_fore	inner_hind	1.48	9.38083			27	3	35	U0	ULO	L	27	c	0	2	3	inner_fore	inner_hind	1.48	5.91608				27	3
28	3	0.0223023	U0	ULO	L	c	0	2	3	inner_fore	1.47		28	3	79	U0	ULO	L	28	c	0	2	3	inner_fore	inner_hind	1.47	8.88819			28	3	31	U0	ULO	L	28	c	0	2	3	inner_fore	inner_hind	1.47	5.56776				28	3
29	3	0.0200414	U0	ULO	L	c	0	2	3	inner_fore	1.51		29	3	80	U0	ULO	L	30	c	0	2	3	inner_fore	inner_hind	1.51	8.94427			29	3	29	U0	ULO	L	29	c	0	2	3	inner_fore	inner_hind	1.47	5.38516				29	3
30	3	0.02016	U0	ULO	L	c	0	2	3	inner_fore	1.42		30	3	82	U0	ULO	L	31	c	0	2	3	inner_fore	inner_hind	1.53	9.05539			30	3	33	U0	ULO	L	30	c	0	2	3	inner_fore	inner_hind	1.51	5.74456				30	3
31	4	0.0272825	U0	ULO	L	c	0	2	4	inner_fore	1.21		31	3	85	U0	ULO	L	32	c	0	2	3	inner_fore	inner_hind	1.53	9.21954			31	3	28	U0	ULO	L	33	c	0	2	3	inner_fore	inner_hind	1.42	5.2915				31	3
32	4	0.0357437	U0	ULO	L	c	0	2	4	inner_fore	1.27		32	3	87	U0	ULO	L	33	c	0	2	3	inner_fore	inner_hind	1.42	9.32738			32	4	26	U0	ULO	L	34	c	0	2	4	inner_fore	inner_hind	1.21	5.09902				32	3
33	4	0.0219002	U0	ULO	L	c	0	2	4	inner_fore	1.24		33	4	78	U0	ULO	L	34	c	0	2	4	inner_fore	inner_hind	1.21	8.83176			33	4	31	U0	ULO	L	35	c	0	2	4	inner_fore	inner_hind	1.27	5.56776				33	4
34	4	0.0170426	U0	ULO	L	c	0	2	4	inner_fore	1.23		34	4	78	U0	ULO	L	35	c	0	2	4	inner_fore	inner_hind	1.27	8.83176			34	4	24	U0	ULO	L	36	c	0	2	4	inner_fore	inner_hind	1.24	4.89898				34	4
35	5	0.00747649	U0	ULO	L	c	0	4	5	inner_fore	1.42		35	4	87	U0	ULO	L	36	c	0	2	4	inner_fore	inner_hind	1.24	9.32738			35	4	19	U0	ULO	L	37	c	0	2	4	inner_fore	inner_hind	1.23	4.3589				35	4
36	5	0.00973855	U0	ULO	L	c	0	4	5	inner_fore	1.47		36	4	88	U0	ULO	L	37	c	0	2	4	inner_fore	inner_hind	1.23	9.38083			36	5	27	U0	ULO	L	40	c	0	4	5	inner_fore	inner_hind	1.42	5.19615				36	4
37	5	0.0116308	U0	ULO	L	c	0	4	5	inner_fore	1.34		37	5	70	U0	ULO	L	38	c	0	4	5	inner_fore	inner_hind	1.4	8.3666			37	5	29	U0	ULO	L	44	c	0	4	5	inner_fore	inner_hind	1.47	5.38516				37	5
38	5	0.0143588	U0	ULO	L	c	0	4	5	inner_fore	1.39		38	5	63	U0	ULO	L	39	c	0	4	5	inner_fore	inner_hind	1.47	7.93725			38	5	27	U0	ULO	L	45	c	0	4	5	inner_fore	inner_hind	1.34	5.19615				38	5
39	5	0.0149245	U0	ULO	L	c	0	4	5	inner_fore	1.34		39	5	64	U0	ULO	L	40	c	0	4	5	inner_fore	inner_hind	1.42	8			39	5	28	U0	ULO	L	46	c	0	4	5	inner_fore	inner_hind	1.39	5.2915				39	5
40	7	0.0243763	U0	ULO	L	c	0	1	6	inner_fore	1.3		40	5	70	U0	ULO	L	41	c	0	4	5	inner_fore	inner_hind	1.46	8.3666			40	5	26	U0	ULO	L	47	c	0	4	5	inner_fore	inner_hind	1.34	5.09902				40	5
41	7	0.0221485	U0	ULO	L	c	0	1	6	inner_fore	1.32		41	5	73	U0	ULO	L	43	c	0	4	5	inner_fore	inner_hind	1.46	8.544			41	7	21	U0	ULO	L	56	c	0	1	6	inner_fore	inner_hind	1.3	4.58258				41	5
42	7	0.0174465	U0	ULO	L	c	0	1	6	inner_fore	1.36		42	5	71	U0	ULO	L	44	c	0	4	5	inner_fore	inner_hind	1.47	8.42615			42	7	25	U0	ULO	L	57	c	0	1	6	inner_fore	inner_hind	1.32	5				42	5
43	7	0.0278066	U0	ULO	L	c	0	1	6	inner_fore	1.32		43	5	74	U0	ULO	L	45	c	0	4	5	inner_fore	inner_hind	1.34	8.60233			43	7	24	U0	ULO	L	58	c	0	1	6	inner_fore	inner_hind	1.36	4.89898				43	5
44	7	0.0253703	U0	ULO	L	c	0	1	6	inner_fore	1.27		44	5	64	U0	ULO	L	46	c	0	4	5	inner_fore	inner_hind	1.39	8			44	7	22	U0	ULO	L	59	c	0	1	6	inner_fore	inner_hind	1.32	4.69042				44	5
45	7	0.0296398	U0	ULO	L	c	0	1	6	inner_fore	1.29		45	5	77	U0	ULO	L	47	c	0	4	5	inner_fore	inner_hind	1.34	8.77496			45	7	21	U0	ULO	L	60	c	0	1	6	inner_fore	inner_hind	1.27	4.58258				45	5
46	7	0.0315621	U0	ULO	L	c	0	1	6	inner_fore	1.3		46	7	82	U0	ULO	L	56	c	0	1	6	inner_fore	inner_hind	1.3	9.05539			46	7	21	U0	ULO	L	61	c	0	1	6	inner_fore	inner_hind	1.29	4.58258				46	7
47	7	0.0198468	U0	ULO	L	c	0	1	6	inner_fore	1.29		47	7	83	U0	ULO	L	57	c	0	1	6	inner_fore	inner_hind	1.32	9.11043			47	7	19	U0	ULO	L	62	c	0	1	6	inner_fore	inner_hind	1.3	4.3589				47	7
48	7	0.0237822	U0	ULO	L	c	0	1	6	inner_fore	1.31		48	7	83	U0	ULO	L	58	c	0	1	6	inner_fore	inner_hind	1.36	9.11043			48	7	20	U0	ULO	L	63	c	0	1	6	inner_fore	inner_hind	1.29	4.47214				48	7
49	8	0.0134122	U0	ULO	L	c	0	5	5	inner_fore	1.24		49	7	83	U0	ULO	L	59	c	0	1	6	inner_fore	inner_hind	1.32	9.11043			49	7	19	U0	ULO	L	64	c	0	1	6	inner_fore	inner_hind	1.31	4.3589				49	7
50	8	0.0160823	U0	ULO	L	c	0	5	5	inner_fore	1.21		50	7	80	U0	ULO	L	60	c	0	1	6	inner_fore	inner_hind	1.27	8.94427			50	8	22	U0	ULO	L	65	c	0	5	5	inner_fore	inner_hind	1.24	4.69042				50	7
51	8	0.0148393	U0	ULO	L	c	0	5	5	inner_fore	1.19		51	7	82	U0	ULO	L	61	c	0	1	6	inner_fore	inner_hind	1.29	9.05539			51	8	18	U0	ULO	L	66	c	0	5	5	inner_fore	inner_hind	1.21	4.24264				51	7
52	8	0.0168169	U0	ULO	L	c	0	5	5	inner_fore	1.21		52	7	81	U0	ULO	L	62	c	0	1	6	inner_fore	inner_hind	1.3	9			52	8	18	U0	ULO	L	67	c	0	5	5	inner_fore	inner_hind	1.19	4.24264				52	7
53	8	0.0173512	U0	ULO	L	c	0	5	5	inner_fore	1.16		53	7	80	U0	ULO	L	63	c	0	1	6	inner_fore	inner_hind	1.29	8.94427			53	8	25	U0	ULO	L	68	c	0	5	5	inner_fore	inner_hind	1.21	5				53	7
54	8	0.0160263	U0	ULO	L	c	0	5	5	inner_fore	1.21		54	7	79	U0	ULO	L	64	c	0	1	6	inner_fore	inner_hind	1.31	8.88819			54	8	22	U0	ULO	L	69	c	0	5	5	inner_fore	inner_hind	1.16	4.69042				54	7
55	8	0.0132086	U0	ULO	L	c	0	5	5	inner_fore	1.22		55	8	73	U0	ULO	L	65	c	0	5	5	inner_fore	inner_hind	1.24	8.544			55	8	21	U0	ULO	L	70	c	0	5	5	inner_fore	inner_hind	1.21	4.58258				55	8
56	8	0.0125495	U0	ULO	L	c	0	5	5	inner_fore	1.29		56	8	74	U0	ULO	L	66	c	0	5	5	inner_fore	inner_hind	1.21	8.60233			56	8	23	U0	ULO	L	71	c	0	5	5	inner_fore	inner_hind	1.22	4.79583				56	8
57	8	0.0145735	U0	ULO	L	c	0	5	5	inner_fore	1.28		57	8	73	U0	ULO	L	67	c	0	5	5	inner_fore	inner_hind	1.19	8.544			57	8	24	U0	ULO	L	72	c	0	5	5	inner_fore	inner_hind	1.29	4.89898				57	8
58	8	0.0209507	U0	ULO	L	c	0	5	5	inner_fore	1.23		58	8	77	U0	ULO	L	68	c	0	5	5	inner_fore	inner_hind	1.21	8.77496			58	8	18	U0	ULO	L	73	c	0	5	5	inner_fore	inner_hind	1.28	4.24264				58	8
59	8	0.0128255	U0	ULO	L	c	0	5	5	inner_fore	1.13		59	8	79	U0	ULO	L	69	c	0	5	5	inner_fore	inner_hind	1.16	8.88819			59	8	18	U0	ULO	L	74	c	0	5	5	inner_fore	inner_hind	1.23	4.24264				59	8
60	8	0.0106577	U0	ULO	L	c	0	5	5	inner_fore	1.22		60	8	73	U0	ULO	L	70	c	0	5	5	inner_fore	inner_hind	1.21	8.544			60	8	22	U0	ULO	L	75	c	0	5	5	inner_fore	inner_hind	1.13	4.69042				60	8
61	8	0.0114728	U0	ULO	L	c	0	5	5	inner_fore	1.32		61	8	80	U0	ULO	L	71	c	0	5	5	inner_fore	inner_hind	1.22	8.94427			61	8	24	U0	ULO	L	76	c	0	5	5	inner_fore	inner_hind	1.22	4.89898				61	8
62	8	0.0116039	U0	ULO	L	c	0	5	5	inner_fore	1.25		62	8	76	U0	ULO	L	72	c	0	5	5	inner_fore	inner_hind	1.29	8.7178			62	8	27	U0	ULO	L	77	c	0	5	5	inner_fore	inner_hind	1.32	5.19615				62	8
63	8	0.0107198	U0	ULO	L	c	0	5	5	inner_fore	1.26		63	8	73	U0	ULO	L	73	c	0	5	5	inner_fore	inner_hind	1.28	8.544			63	8	24	U0	ULO	L	79	c	0	5	5	inner_fore	inner_hind	1.25	4.89898				63	8
64	8	0.0115366	U0	ULO	L	c	0	5	5	inner_fore	1.23		64	8	79	U0	ULO	L	74	c	0	5	5	inner_fore	inner_hind	1.23	8.88819			64	8	27	U0	ULO	L	81	c	0	5	5	inner_fore	inner_hind	1.26	5.19615				64	8
65	8	0.016641	U0	ULO	L	c	0	5	5	inner_fore	1.32		65	8	82	U0	ULO	L	75	c	0	5	5	inner_fore	inner_hind	1.13	9.05539			65	8	24	U0	ULO	L	82	c	0	5	5	inner_fore	inner_hind	1.23	4.89898				65	8
66	8	0.0179426	U0	ULO	L	c	0	5	5	inner_fore	1.26		66	8	78	U0	ULO	L	76	c	0	5	5	inner_fore	inner_hind	1.22	8.83176			66	8	25	U0	ULO	L	83	c	0	5	5	inner_fore	inner_hind	1.32	5				66	8
67	8	0.0173171	U0	ULO	L	c	0	5	5	inner_fore	1.24		67	8	74	U0	ULO	L	77	c	0	5	5	inner_fore	inner_hind	1.32	8.60233			67	8	24	U0	ULO	L	84	c	0	5	5	inner_fore	inner_hind	1.26	4.89898				67	8
68	8	0.0136844	U0	ULO	L	c	0	5	5	inner_fore	1.27		68	8	78	U0	ULO	L	78	c	0	5	5	inner_fore	inner_hind	1.2	8.83176			68	8	22	U0	ULO	L	85	c	0	5	5	inner_fore	inner_hind	1.24	4.69042				68	8
69	8	0.0138483	U0	ULO	L	c	0	5	5	inner_fore	1.26		69	8	77	U0	ULO	L	79	c	0	5	5	inner_fore	inner_hind	1.25	8.77496			69	8	21	U0	ULO	L	88	c	0	5	5	inner_fore	inner_hind	1.27	4.58258				69	8
70	8	0.0113186	U0	ULO	L	c	0	5	5	inner_fore	1.24		70	8	81	U0	ULO	L	81	c	0	5	5	inner_fore	inner_hind	1.26	9			70	8	25	U0	ULO	L	89	c	0	5	5	inner_fore	inner_hind	1.26	5				70	8
71	8	0.0137717	U0	ULO	L	c	0	5	5	inner_fore	1.28		71	8	67	U0	ULO	L	82	c	0	5	5	inner_fore	inner_hind	1.23	8.18535			71	8	20	U0	ULO	L	91	c	0	5	5	inner_fore	inner_hind	1.24	4.47214				71	8
72	8	0.0124983	U0	ULO	L	c	0	5	5	inner_fore	1.27		72	8	81	U0	ULO	L	83	c	0	5	5	inner_fore	inner_hind	1.32	9			72	8	29	U0	ULO	L	92	c	0	5	5	inner_fore	inner_hind	1.28	5.38516				72	8
73	8	0.00777345	U0	ULO	L	c	0	5	5	inner_fore	1.23		73	8	70	U0	ULO	L	84	c	0	5	5	inner_fore	inner_hind	1.26	8.3666			73	8	26	U0	ULO	L	93	c	0	5	5	inner_fore	inner_hind	1.27	5.09902				73	8
74	8	0.0123088	U0	ULO	L	c	0	5	5	inner_fore	1.28		74	8	62	U0	ULO	L	85	c	0	5	5	inner_fore	inner_hind	1.24	7.87401			74	8	20	U0	ULO	L	94	c	0	5	5	inner_fore	inner_hind	1.23	4.47214				74	8
75	8	0.0097006	U0	ULO	L	c	0	5	5	inner_fore	1.25		75	8	76	U0	ULO	L	88	c	0	5	5	inner_fore	inner_hind	1.27	8.7178			75	8	26	U0	ULO	L	95	c	0	5	5	inner_fore	inner_hind	1.28	5.09902				75	8
76	8	0.0172154	U0	ULO	L	c	0	5	5	inner_fore	1.41		76	8	77	U0	ULO	L	89	c	0	5	5	inner_fore	inner_hind	1.26	8.77496			76	8	28	U0	ULO	L	96	c	0	5	5	inner_fore	inner_hind	1.25	5.2915				76	8
77	8	0.0158878	U0	ULO	L	c	0	5	5	inner_fore	1.21		77	8	76	U0	ULO	L	90	c	0	5	5	inner_fore	inner_hind	1.25	8.7178			77	8	30	U0	ULO	L	97	c	0	5	5	inner_fore	inner_hind	1.41	5.47723				77	8
78	8	0.0101913	U0	ULO	L	c	0	5	5	inner_fore	1.09		78	8	75	U0	ULO	L	91	c	0	5	5	inner_fore	inner_hind	1.24	8.66025			78	8	13	U0	ULO	L	98	c	0	5	5	inner_fore	inner_hind	1.21	3.60555				78	8
79	8	0.0107223	U0	ULO	L	c	0	5	5	inner_fore	1.31		79	8	76	U0	ULO	L	92	c	0	5	5	inner_fore	inner_hind	1.28	8.7178			79	8	21	U0	ULO	L	99	c	0	5	5	inner_fore	inner_hind	1.09	4.58258				79	8
80	9	0.0241269	U0	ULO	L	c	0	3	6	inner_fore	1.19		80	8	78	U0	ULO	L	93	c	0	5	5	inner_fore	inner_hind	1.27	8.83176			80	8	24	U0	ULO	L	101	c	0	5	5	inner_fore	inner_hind	1.31	4.89898				80	8
81	9	0.0150322	U0	ULO	L	c	0	3	6	inner_fore	1.21		81	8	76	U0	ULO	L	94	c	0	5	5	inner_fore	inner_hind	1.23	8.7178			81	9	21	U0	ULO	L	102	c	0	3	6	inner_fore	inner_hind	1.19	4.58258				81	8
82	9	0.0242436	U0	ULO	L	c	0	3	6	inner_fore	1.23		82	8	81	U0	ULO	L	95	c	0	5	5	inner_fore	inner_hind	1.28	9			82	9	20	U0	ULO	L	103	c	0	3	6	inner_fore	inner_hind	1.21	4.47214				82	8
83	9	0.0301323	U0	ULO	L	c	0	3	6	inner_fore	1.15		83	8	82	U0	ULO	L	96	c	0	5	5	inner_fore	inner_hind	1.25	9.05539			83	9	23	U0	ULO	L	104	c	0	3	6	inner_fore	inner_hind	1.23	4.79583				83	8
84	9	0.0318034	U0	ULO	L	c	0	3	6	inner_fore	1.15		84	8	79	U0	ULO	L	97	c	0	5	5	inner_fore	inner_hind	1.41	8.88819			84	9	22	U0	ULO	L	105	c	0	3	6	inner_fore	inner_hind	1.15	4.69042				84	8
85	9	0.0253806	U0	ULO	L	c	0	3	6	inner_fore	1.15		85	8	73	U0	ULO	L	98	c	0	5	5	inner_fore	inner_hind	1.21	8.544			85	9	20	U0	ULO	L	106	c	0	3	6	inner_fore	inner_hind	1.15	4.47214				85	8
86	9	0.0226025	U0	ULO	L	c	0	3	6	inner_fore	1.17		86	8	78	U0	ULO	L	99	c	0	5	5	inner_fore	inner_hind	1.09	8.83176			86	9	20	U0	ULO	L	107	c	0	3	6	inner_fore	inner_hind	1.15	4.47214				86	8
87	9	0.022159	U0	ULO	L	c	0	3	6	inner_fore	1.24		87	8	61	U0	ULO	L	101	c	0	5	5	inner_fore	inner_hind	1.31	7.81025			87	9	22	U0	ULO	L	108	c	0	3	6	inner_fore	inner_hind	1.17	4.69042				87	8
88	9	0.0273312	U0	ULO	L	c	0	3	6	inner_fore	1.14		88	9	82	U0	ULO	L	102	c	0	3	6	inner_fore	inner_hind	1.19	9.05539			88	9	21	U0	ULO	L	109	c	0	3	6	inner_fore	inner_hind	1.24	4.58258				88	9
89	9	0.019404	U0	ULO	L	c	0	3	6	inner_fore	1.19		89	9	83	U0	ULO	L	103	c	0	3	6	inner_fore	inner_hind	1.21	9.11043			89	9	18	U0	ULO	L	110	c	0	3	6	inner_fore	inner_hind	1.14	4.24264				89	9
90	9	0.0186762	U0	ULO	L	c	0	3	6	inner_fore	1.25		90	9	83	U0	ULO	L	104	c	0	3	6	inner_fore	inner_hind	1.23	9.11043			90	9	22	U0	ULO	L	111	c	0	3	6	inner_fore	inner_hind	1.19	4.69042				90	9
91	9	0.0181742	U0	ULO	L	c	0	3	6	inner_fore	1.26		91	9	87	U0	ULO	L	105	c	0	3	6	inner_fore	inner_hind	1.15	9.32738			91	9	25	U0	ULO	L	112	c	0	3	6	inner_fore	inner_hind	1.25	5				91	9
92	9	0.0235165	U0	ULO	L	c	0	3	6	inner_fore	1.16		92	9	83	U0	ULO	L	106	c	0	3	6	inner_fore	inner_hind	1.15	9.11043			92	9	20	U0	ULO	L	113	c	0	3	6	inner_fore	inner_hind	1.26	4.47214				92	9
93	9	0.0250546	U0	ULO	L	c	0	3	6	inner_fore	1.26		93	9	85	U0	ULO	L	107	c	0	3	6	inner_fore	inner_hind	1.15	9.21954			93	9	18	U0	ULO	L	114	c	0	3	6	inner_fore	inner_hind	1.16	4.24264				93	9
94	9	0.0167664	U0	ULO	L	c	0	3	6	inner_fore	1.23		94	9	85	U0	ULO	L	108	c	0	3	6	inner_fore	inner_hind	1.17	9.21954			94	9	27	U0	ULO	L	115	c	0	3	6	inner_fore	inner_hind	1.26	5.19615				94	9
95	10	0.0196038	U0	ULO	L	c	0	5	7	inner_fore	1.22		95	9	84	U0	ULO	L	109	c	0	3	6	inner_fore	inner_hind	1.24	9.16515			95	9	20	U0	ULO	L	116	c	0	3	6	inner_fore	inner_hind	1.23	4.47214				95	9
96	10	0.0220801	U0	ULO	L	c	0	5	7	inner_fore	1.36		96	9	85	U0	ULO	L	110	c	0	3	6	inner_fore	inner_hind	1.14	9.21954			96	10	24	U0	ULO	L	117	c	0	5	7	inner_fore	inner_hind	1.22	4.89898				96	9
97	10	0.0171926	U0	ULO	L	c	0	5	7	inner_fore	1.36		97	9	85	U0	ULO	L	111	c	0	3	6	inner_fore	inner_hind	1.19	9.21954			97	10	26	U0	ULO	L	119	c	0	5	7	inner_fore	inner_hind	1.36	5.09902				97	9
98	10	0.0127091	U0	ULO	L	c	0	5	7	inner_fore	1.36		98	9	87	U0	ULO	L	112	c	0	3	6	inner_fore	inner_hind	1.25	9.32738			98	10	35	U0	ULO	L	123	c	0	5	7	inner_fore	inner_hind	1.36	5.91608				98	9
99	10	0.013773	U0	ULO	L	c	0	5	7	inner_fore	1.34		99	9	81	U0	ULO	L	113	c	0	3	6	inner_fore	inner_hind	1.26	9			99	10	33	U0	ULO	L	124	c	0	5	7	inner_fore	inner_hind	1.38	5.74456				99	9
100	10	0.0204561	U0	ULO	L	c	0	5	7	inner_fore	1.34		100	9	87	U0	ULO	L	114	c	0	3	6	inner_fore	inner_hind	1.16	9.32738			100	10	29	U0	ULO	L	125	c	0	5	7	inner_fore	inner_hind	1.36	5.38516				100	9
101	10	0.016591	U0	ULO	L	c	0	5	7	inner_fore	1.3		101	9	91	U0	ULO	L	115	c	0	3	6	inner_fore	inner_hind	1.26	9.53939			101	10	34	U0	ULO	L	126	c	0	5	7	inner_fore	inner_hind	1.34	5.83095				101	9
102	10	0.0185423	U0	ULO	L	c	0	5	7	inner_fore	1.22		102	9	86	U0	ULO	L	116	c	0	3	6	inner_fore	inner_hind	1.23	9.27362			102	10	35	U0	ULO	L	127	c	0	5	7	inner_fore	inner_hind	1.34	5.91608				102	9
103	10	0.0209745	U0	ULO	L	c	0	5	7	inner_fore	1.26		103	10	70	U0	ULO	L	117	c	0	5	7	inner_fore	inner_hind	1.22	8.3666			103	10	27	U0	ULO	L	128	c	0	5	7	inner_fore	inner_hind	1.3	5.19615				103	10
104	10	0.018449	U0	ULO	L	c	0	5	7	inner_fore	1.26		104	10	72	U0	ULO	L	118	c	0	5	7	inner_fore	inner_hind	1.3	8.48528			104	10	32	U0	ULO	L	130	c	0	5	7	inner_fore	inner_hind	1.22	5.65685				104	10
105	10	0.00944248	U0	ULO	L	c	0	5	7	inner_fore	1.34		105	10	71	U0	ULO	L	119	c	0	5	7	inner_fore	inner_hind	1.36	8.42615			105	10	27	U0	ULO	L	131	c	0	5	7	inner_fore	inner_hind	1.22	5.19615				105	10
106	10	0.0136654	U0	ULO	L	c	0	5	7	inner_fore	1.34		106	10	80	U0	ULO	L	120	c	0	5	7	inner_fore	inner_hind	1.4	8.94427			106	10	28	U0	ULO	L	134	c	0	5	7	inner_fore	inner_hind	1.26	5.2915				106	10
107	10	0.00860554	U0	ULO	L	c	0	5	7	inner_fore	1.38		107	10	80	U0	ULO	L	123	c	0	5	7	inner_fore	inner_hind	1.36	8.94427			107	10	28	U0	ULO	L	135	c	0	5	7	inner_fore	inner_hind	1.26	5.2915				107	10
108	10	0.0145798	U0	ULO	L	c	0	5	7	inner_fore	1.4		108	10	71	U0	ULO	L	125	c	0	5	7	inner_fore	inner_hind	1.36	8.42615			108	10	28	U0	ULO	L	136	c	0	5	7	inner_fore	inner_hind	1.34	5.2915				108	10
109	10	0.0122976	U0	ULO	L	c	0	5	7	inner_fore	1.3		109	10	79	U0	ULO	L	126	c	0	5	7	inner_fore	inner_hind	1.34	8.88819			109	10	26	U0	ULO	L	137	c	0	5	7	inner_fore	inner_hind	1.34	5.09902				109	10
110	10	0.0194387	U0	ULO	L	c	0	5	7	inner_fore	1.28		110	10	87	U0	ULO	L	127	c	0	5	7	inner_fore	inner_hind	1.34	9.32738			110	10	27	U0	ULO	L	138	c	0	5	7	inner_fore	inner_hind	1.38	5.19615				110	10
111	10	0.0166508	U0	ULO	L	c	0	5	7	inner_fore	1.24		111	10	81	U0	ULO	L	128	c	0	5	7	inner_fore	inner_hind	1.3	9			111	10	49	U0	ULO	L	139	c	0	5	7	inner_fore	inner_hind	1.4	7				111	10
112	10	0.0232899	U0	ULO	L	c	0	5	7	inner_fore	1.22		112	10	87	U0	ULO	L	129	c	0	5	7	inner_fore	inner_hind	1.3	9.32738			112	10	35	U0	ULO	L	143	c	0	5	7	inner_fore	inner_hind	1.3	5.91608				112	10
113	10	0.0186041	U0	ULO	L	c	0	5	7	inner_fore	1.23		113	10	71	U0	ULO	L	131	c	0	5	7	inner_fore	inner_hind	1.22	8.42615			113	10	28	U0	ULO	L	144	c	0	5	7	inner_fore	inner_hind	1.28	5.2915				113	10
114	10	0.0163002	U0	ULO	L	c	0	5	7	inner_fore	1.21		114	10	68	U0	ULO	L	132	c	0	5	7	inner_fore	inner_hind	1.24	8.24621			114	10	27	U0	ULO	L	145	c	0	5	7	inner_fore	inner_hind	1.24	5.19615				114	10
115	10	0.0272709	U0	ULO	L	c	0	5	7	inner_fore	1.22		115	10	74	U0	ULO	L	133	c	0	5	7	inner_fore	inner_hind	1.26	8.60233			115	10	27	U0	ULO	L	146	c	0	5	7	inner_fore	inner_hind	1.22	5.19615				115	10
116	10	0.01561	U0	ULO	L	c	0	5	7	inner_fore	1.26		116	10	74	U0	ULO	L	134	c	0	5	7	inner_fore	inner_hind	1.26	8.60233			116	10	29	U0	ULO	L	147	c	0	5	7	inner_fore	inner_hind	1.28	5.38516				116	10
117	10	0.0134132	U0	ULO	L	c	0	5	7	inner_fore	1.29		117	10	73	U0	ULO	L	135	c	0	5	7	inner_fore	inner_hind	1.26	8.544			117	10	29	U0	ULO	L	148	c	0	5	7	inner_fore	inner_hind	1.24	5.38516				117	10
118	10	0.00901742	U0	ULO	L	c	0	5	7	inner_fore	1.34		118	10	74	U0	ULO	L	136	c	0	5	7	inner_fore	inner_hind	1.34	8.60233			118	10	29	U0	ULO	L	149	c	0	5	7	inner_fore	inner_hind	1.23	5.38516				118	10
119	10	0.0170626	U0	ULO	L	c	0	5	7	inner_fore	1.3		119	10	76	U0	ULO	L	137	c	0	5	7	inner_fore	inner_hind	1.34	8.7178			119	10	25	U0	ULO	L	150	c	0	5	7	inner_fore	inner_hind	1.21	5				119	10
120	10	0.020289	U0	ULO	L	c	0	5	7	inner_fore	1.26		120	10	71	U0	ULO	L	138	c	0	5	7	inner_fore	inner_hind	1.38	8.42615			120	10	21	U0	ULO	L	151	c	0	5	7	inner_fore	inner_hind	1.22	4.58258				120	10
121	10	0.0159184	U0	ULO	L	c	0	5	7	inner_fore	1.32		121	10	78	U0	ULO	L	139	c	0	5	7	inner_fore	inner_hind	1.4	8.83176			121	10	28	U0	ULO	L	152	c	0	5	7	inner_fore	inner_hind	1.26	5.2915				121	10
122	10	0.0124074	U0	ULO	L	c	0	5	7	inner_fore	1.34		122	10	74	U0	ULO	L	140	c	0	5	7	inner_fore	inner_hind	1.24	8.60233			122	10	28	U0	ULO	L	153	c	0	5	7	inner_fore	inner_hind	1.27	5.2915				122	10
123	10	0.0152584	U0	ULO	L	c	0	5	7	inner_fore	1.31		123	10	84	U0	ULO	L	142	c	0	5	7	inner_fore	inner_hind	1.34	9.16515			123	10	30	U0	ULO	L	154	c	0	5	7	inner_fore	inner_hind	1.29	5.47723				123	10
124	10	0.0143304	U0	ULO	L	c	0	5	7	inner_fore	1.33		124	10	84	U0	ULO	L	143	c	0	5	7	inner_fore	inner_hind	1.3	9.16515			124	10	28	U0	ULO	L	155	c	0	5	7	inner_fore	inner_hind	1.34	5.2915				124	10
125	10	0.0131398	U0	ULO	L	c	0	5	7	inner_fore	1.28		125	10	75	U0	ULO	L	144	c	0	5	7	inner_fore	inner_hind	1.28	8.66025			125	10	29	U0	ULO	L	156	c	0	5	7	inner_fore	inner_hind	1.3	5.38516				125	10
126	11	0.0158512	U0	ULO	L	c	0	3	1	inner_fore	1.3		126	10	77	U0	ULO	L	145	c	0	5	7	inner_fore	inner_hind	1.24	8.77496			126	10	32	U0	ULO	L	157	c	0	5	7	inner_fore	inner_hind	1.26	5.65685				126	10
127	11	0.0103207	U0	ULO	L	c	0	3	1	inner_fore	1.28		127	10	73	U0	ULO	L	146	c	0	5	7	inner_fore	inner_hind	1.22	8.544			127	10	25	U0	ULO	L	158	c	0	5	7	inner_fore	inner_hind	1.32	5				127	10
128	11	0.0119223	U0	ULO	L	c	0	3	1	inner_fore	1.25		128	10	77	U0	ULO	L	149	c	0	5	7	inner_fore	inner_hind	1.23	8.77496			128	10	32	U0	ULO	L	159	c	0	5	7	inner_fore	inner_hind	1.34	5.65685				128	10
129	11	0.0100681	U0	ULO	L	c	0	3	1	inner_fore	1.25		129	10	70	U0	ULO	L	150	c	0	5	7	inner_fore	inner_hind	1.21	8.3666			129	10	33	U0	ULO	L	160	c	0	5	7	inner_fore	inner_hind	1.31	5.74456				129	10
130	11	0.0112662	U0	ULO	L	c	0	3	1	inner_fore	1.26		130	10	68	U0	ULO	L	151	c	0	5	7	inner_fore	inner_hind	1.22	8.24621			130	10	31	U0	ULO	L	163	c	0	5	7	inner_fore	inner_hind	1.33	5.56776				130	10
131	11	0.0120854	U0	ULO	L	c	0	3	1	inner_fore	1.22		131	10	73	U0	ULO	L	152	c	0	5	7	inner_fore	inner_hind	1.26	8.544			131	10	25	U0	ULO	L	164	c	0	5	7	inner_fore	inner_hind	1.28	5				131	10
132	11	0.0165496	U0	ULO	L	c	0	3	1	inner_fore	1.28		132	10	73	U0	ULO	L	154	c	0	5	7	inner_fore	inner_hind	1.29	8.544			132	10	29	U0	ULO	L	165	c	0	5	7	inner_fore	inner_hind	1.22	5.38516				132	10
133	11	0.0164123	U0	ULO	L	c	0	3	1	inner_fore	1.16		133	10	74	U0	ULO	L	155	c	0	5	7	inner_fore	inner_hind	1.34	8.60233			133	11	21	U0	ULO	L	166	c	0	3	1	inner_fore	inner_hind	1.3	4.58258				133	10
134	11	0.0151921	U0	ULO	L	c	0	3	1	inner_fore	1.23		134	10	70	U0	ULO	L	156	c	0	5	7	inner_fore	inner_hind	1.3	8.3666			134	11	20	U0	ULO	L	167	c	0	3	1	inner_fore	inner_hind	1.28	4.47214				134	10
135	11	0.0162609	U0	ULO	L	c	0	3	1	inner_fore	1.22		135	10	79	U0	ULO	L	157	c	0	5	7	inner_fore	inner_hind	1.26	8.88819			135	11	17	U0	ULO	L	168	c	0	3	1	inner_fore	inner_hind	1.25	4.12311				135	10
136	11	0.016786	U0	ULO	L	c	0	3	1	inner_fore	1.16		136	10	87	U0	ULO	L	158	c	0	5	7	inner_fore	inner_hind	1.32	9.32738			136	11	16	U0	ULO	L	169	c	0	3	1	inner_fore	inner_hind	1.25	4				136	10
137	11	0.0136055	U0	ULO	L	c	0	3	1	inner_fore	1.12		137	10	80	U0	ULO	L	159	c	0	5	7	inner_fore	inner_hind	1.34	8.94427			137	11	16	U0	ULO	L	170	c	0	3	1	inner_fore	inner_hind	1.26	4				137	10
138	11	0.0155332	U0	ULO	L	c	0	3	1	inner_fore	1.2		138	10	80	U0	ULO	L	160	c	0	5	7	inner_fore	inner_hind	1.31	8.94427			138	11	21	U0	ULO	L	171	c	0	3	1	inner_fore	inner_hind	1.22	4.58258				138	10
139	11	0.0211524	U0	ULO	L	c	0	3	1	inner_fore	1.19		139	10	75	U0	ULO	L	162	c	0	5	7	inner_fore	inner_hind	1.27	8.66025			139	11	22	U0	ULO	L	172	c	0	3	1	inner_fore	inner_hind	1.28	4.69042				139	10
140	11	0.0157446	U0	ULO	L	c	0	3	1	inner_fore	1.22		140	10	72	U0	ULO	L	163	c	0	5	7	inner_fore	inner_hind	1.33	8.48528			140	11	16	U0	ULO	L	173	c	0	3	1	inner_fore	inner_hind	1.16	4				140	10
141	11	0.0152747	U0	ULO	L	c	0	3	1	inner_fore	1.23		141	10	73	U0	ULO	L	164	c	0	5	7	inner_fore	inner_hind	1.28	8.544			141	11	28	U0	ULO	L	174	c	0	3	1	inner_fore	inner_hind	1.34	5.2915				141	10
142	11	0.0179124	U0	ULO	L	c	0	3	1	inner_fore	1.24		142	11	85	U0	ULO	L	166	c	0	3	1	inner_fore	inner_hind	1.3	9.21954			142	11	17	U0	ULO	L	175	c	0	3	1	inner_fore	inner_hind	1.23	4.12311				142	11
143	11	0.0167304	U0	ULO	L	c	0	3	1	inner_fore	1.26		143	11	78	U0	ULO	L	167	c	0	3	1	inner_fore	inner_hind	1.28	8.83176			143	11	22	U0	ULO	L	176	c	0	3	1	inner_fore	inner_hind	1.22	4.69042				143	11
144	11	0.017944	U0	ULO	L	c	0	3	1	inner_fore	1.22		144	11	79	U0	ULO	L	168	c	0	3	1	inner_fore	inner_hind	1.25	8.88819			144	11	18	U0	ULO	L	177	c	0	3	1	inner_fore	inner_hind	1.16	4.24264				144	11
145	11	0.017488	U0	ULO	L	c	0	3	1	inner_fore	1.3		145	11	80	U0	ULO	L	169	c	0	3	1	inner_fore	inner_hind	1.25	8.94427			145	11	22	U0	ULO	L	178	c	0	3	1	inner_fore	inner_hind	1.12	4.69042				145	11
146	11	0.0150913	U0	ULO	L	c	0	3	1	inner_fore	1.28		146	11	80	U0	ULO	L	170	c	0	3	1	inner_fore	inner_hind	1.26	8.94427			146	11	23	U0	ULO	L	179	c	0	3	1	inner_fore	inner_hind	1.2	4.79583				146	11
147	11	0.0107738	U0	ULO	L	c	0	3	1	inner_fore	1.3		147	11	81	U0	ULO	L	171	c	0	3	1	inner_fore	inner_hind	1.22	9			147	11	16	U0	ULO	L	180	c	0	3	1	inner_fore	inner_hind	1.19	4				147	11
148	12	0.0241023	U0	ULO	L	c	0	1	8	inner_fore	1.17		148	11	80	U0	ULO	L	172	c	0	3	1	inner_fore	inner_hind	1.28	8.94427			148	11	16	U0	ULO	L	181	c	0	3	1	inner_fore	inner_hind	1.22	4				148	11
149	12	0.0240148	U0	ULO	L	c	0	1	8	inner_fore	1.18		149	11	78	U0	ULO	L	173	c	0	3	1	inner_fore	inner_hind	1.16	8.83176			149	11	17	U0	ULO	L	182	c	0	3	1	inner_fore	inner_hind	1.23	4.12311				149	11
150	12	0.027061	U0	ULO	L	c	0	1	8	inner_fore	1.22		150	11	86	U0	ULO	L	175	c	0	3	1	inner_fore	inner_hind	1.23	9.27362			150	11	19	U0	ULO	L	183	c	0	3	1	inner_fore	inner_hind	1.24	4.3589				150	11
151	12	0.0291585	U0	ULO	L	c	0	1	8	inner_fore	1.2		151	11	88	U0	ULO	L	176	c	0	3	1	inner_fore	inner_hind	1.22	9.38083			151	11	21	U0	ULO	L	184	c	0	3	1	inner_fore	inner_hind	1.26	4.58258				151	11
152	12	0.0278786	U0	ULO	L	c	0	1	8	inner_fore	1.21		152	11	92	U0	ULO	L	177	c	0	3	1	inner_fore	inner_hind	1.16	9.59166			152	11	18	U0	ULO	L	185	c	0	3	1	inner_fore	inner_hind	1.22	4.24264				152	11
153	12	0.0258281	U0	ULO	L	c	0	1	8	inner_fore	1.21		153	11	82	U0	ULO	L	178	c	0	3	1	inner_fore	inner_hind	1.12	9.05539			153	11	18	U0	ULO	L	187	c	0	3	1	inner_fore	inner_hind	1.3	4.24264				153	11
154	12	0.0191915	U0	ULO	L	c	0	1	8	inner_fore	1.2		154	11	79	U0	ULO	L	179	c	0	3	1	inner_fore	inner_hind	1.2	8.88819			154	11	14	U0	ULO	L	188	c	0	3	1	inner_fore	inner_hind	1.28	3.74166				154	11
155	12	0.0201243	U0	ULO	L	c	0	1	8	inner_fore	1.2		155	11	78	U0	ULO	L	180	c	0	3	1	inner_fore	inner_hind	1.19	8.83176			155	11	18	U0	ULO	L	189	c	0	3	1	inner_fore	inner_hind	1.3	4.24264				155	11
156	12	0.0278933	U0	ULO	L	c	0	1	8	inner_fore	1.16		156	11	76	U0	ULO	L	181	c	0	3	1	inner_fore	inner_hind	1.22	8.7178			156	12	23	U0	ULO	L	190	c	0	1	8	inner_fore	inner_hind	1.17	4.79583				156	11
157	12	0.0283615	U0	ULO	L	c	0	1	8	inner_fore	1.14		157	11	76	U0	ULO	L	182	c	0	3	1	inner_fore	inner_hind	1.23	8.7178			157	12	25	U0	ULO	L	191	c	0	1	8	inner_fore	inner_hind	1.18	5				157	11
158	14	0.0142442	U0	ULO	L	c	0	1	9	inner_fore	1.29		158	11	77	U0	ULO	L	183	c	0	3	1	inner_fore	inner_hind	1.24	8.77496			158	12	25	U0	ULO	L	192	c	0	1	8	inner_fore	inner_hind	1.22	5				158	11
159	14	0.0133617	U0	ULO	L	c	0	1	9	inner_fore	1.23		159	11	80	U0	ULO	L	184	c	0	3	1	inner_fore	inner_hind	1.26	8.94427			159	12	24	U0	ULO	L	193	c	0	1	8	inner_fore	inner_hind	1.2	4.89898				159	11
160	14	0.0102077	U0	ULO	L	c	0	1	9	inner_fore	1.24		160	11	80	U0	ULO	L	185	c	0	3	1	inner_fore	inner_hind	1.22	8.94427			160	12	24	U0	ULO	L	194	c	0	1	8	inner_fore	inner_hind	1.21	4.89898				160	11
161	14	0.0157952	U0	ULO	L	c	0	1	9	inner_fore	1.21		161	11	77	U0	ULO	L	187	c	0	3	1	inner_fore	inner_hind	1.3	8.77496			161	12	24	U0	ULO	L	195	c	0	1	8	inner_fore	inner_hind	1.21	4.89898				161	11
162	14	0.0141794	U0	ULO	L	c	0	1	9	inner_fore	1.16		162	11	80	U0	ULO	L	188	c	0	3	1	inner_fore	inner_hind	1.28	8.94427			162	12	24	U0	ULO	L	196	c	0	1	8	inner_fore	inner_hind	1.2	4.89898				162	11
163	14	0.0181108	U0	ULO	L	c	0	1	9	inner_fore	1.1		163	11	85	U0	ULO	L	189	c	0	3	1	inner_fore	inner_hind	1.3	9.21954			163	12	26	U0	ULO	L	197	c	0	1	8	inner_fore	inner_hind	1.2	5.09902				163	11
164	15	0.0174708	U0	ULO	L	c	0	3	10	inner_fore	1.17		164	12	74	U0	ULO	L	190	c	0	1	8	inner_fore	inner_hind	1.17	8.60233			164	12	25	U0	ULO	L	198	c	0	1	8	inner_fore	inner_hind	1.16	5				164	12
165	15	0.023986	U0	ULO	L	c	0	3	10	inner_fore	1.16		165	12	67	U0	ULO	L	191	c	0	1	8	inner_fore	inner_hind	1.18	8.18535			165	12	24	U0	ULO	L	199	c	0	1	8	inner_fore	inner_hind	1.14	4.89898				165	12
166	15	0.0127614	U0	ULO	L	c	0	3	10	inner_fore	1.15		166	12	72	U0	ULO	L	192	c	0	1	8	inner_fore	inner_hind	1.22	8.48528			166	14	21	U0	ULO	L	231	c	0	1	9	inner_fore	inner_hind	1.29	4.58258				166	12
167	15	0.0143618	U0	ULO	L	c	0	3	10	inner_fore	1.2		167	12	69	U0	ULO	L	193	c	0	1	8	inner_fore	inner_hind	1.2	8.30662			167	14	19	U0	ULO	L	232	c	0	1	9	inner_fore	inner_hind	1.23	4.3589				167	12
168	15	0.0164558	U0	ULO	L	c	0	3	10	inner_fore	1.14		168	12	65	U0	ULO	L	194	c	0	1	8	inner_fore	inner_hind	1.21	8.06226			168	14	22	U0	ULO	L	233	c	0	1	9	inner_fore	inner_hind	1.24	4.69042				168	12
169	15	0.0243532	U0	ULO	L	c	0	3	10	inner_fore	1.2		169	12	68	U0	ULO	L	195	c	0	1	8	inner_fore	inner_hind	1.21	8.24621			169	14	23	U0	ULO	L	234	c	0	1	9	inner_fore	inner_hind	1.21	4.79583				169	12
170	15	0.0294991	U0	ULO	L	c	0	3	10	inner_fore	1.08		170	12	68	U0	ULO	L	196	c	0	1	8	inner_fore	inner_hind	1.2	8.24621			170	14	20	U0	ULO	L	235	c	0	1	9	inner_fore	inner_hind	1.16	4.47214				170	12
171	15	0.0223825	U0	ULO	L	c	0	3	10	inner_fore	1.14		171	12	73	U0	ULO	L	197	c	0	1	8	inner_fore	inner_hind	1.2	8.544			171	14	19	U0	ULO	L	236	c	0	1	9	inner_fore	inner_hind	1.1	4.3589				171	12
172	15	0.0192931	U0	ULO	L	c	0	3	10	inner_fore	1.19		172	12	70	U0	ULO	L	198	c	0	1	8	inner_fore	inner_hind	1.16	8.3666			172	15	18	U0	ULO	L	240	c	0	3	10	inner_fore	inner_hind	1.17	4.24264				172	12
173	15	0.0186464	U0	ULO	L	c	0	3	10	inner_fore	1.16		173	12	65	U0	ULO	L	199	c	0	1	8	inner_fore	inner_hind	1.14	8.06226			173	15	20	U0	ULO	L	241	c	0	3	10	inner_fore	inner_hind	1.16	4.47214				173	12
174	15	0.0204991	U0	ULO	L	c	0	3	10	inner_fore	1.17		174	14	89	U0	ULO	L	231	c	0	1	9	inner_fore	inner_hind	1.29	9.43398			174	15	18	U0	ULO	L	242	c	0	3	10	inner_fore	inner_hind	1.15	4.24264				174	14
175	15	0.0208562	U0	ULO	L	c	0	3	10	inner_fore	1.16		175	14	78	U0	ULO	L	232	c	0	1	9	inner_fore	inner_hind	1.23	8.83176			175	15	29	U0	ULO	L	243	c	0	3	10	inner_fore	inner_hind	1.25	5.38516				175	14
176	15	0.0141338	U0	ULO	L	c	0	3	10	inner_fore	1.16		176	14	81	U0	ULO	L	233	c	0	1	9	inner_fore	inner_hind	1.24	9			176	15	23	U0	ULO	L	244	c	0	3	10	inner_fore	inner_hind	1.2	4.79583				176	14
177	15	0.0245962	U0	ULO	L	c	0	3	10	inner_fore	1.22		177	14	82	U0	ULO	L	234	c	0	1	9	inner_fore	inner_hind	1.21	9.05539			177	15	20	U0	ULO	L	245	c	0	3	10	inner_fore	inner_hind	1.14	4.47214				177	14
178	15	0.0135012	U0	ULO	L	c	0	3	10	inner_fore	1.19		178	14	94	U0	ULO	L	235	c	0	1	9	inner_fore	inner_hind	1.16	9.69536			178	15	22	U0	ULO	L	246	c	0	3	10	inner_fore	inner_hind	1.18	4.69042				178	14
179	15	0.014801	U0	ULO	L	c	0	3	10	inner_fore	1.19		179	14	92	U0	ULO	L	236	c	0	1	9	inner_fore	inner_hind	1.1	9.59166			179	15	21	U0	ULO	L	248	c	0	3	10	inner_fore	inner_hind	1.2	4.58258				179	14
180	15	0.0183631	U0	ULO	L	c	0	3	10	inner_fore	1.2		180	14	93	U0	ULO	L	239	c	0	1	9	inner_fore	inner_hind	1.13	9.64365			180	15	17	U0	ULO	L	250	c	0	3	10	inner_fore	inner_hind	1.08	4.12311				180	14
181	15	0.0192823	U0	ULO	L	c	0	3	10	inner_fore	1.18		181	15	64	U0	ULO	L	240	c	0	3	10	inner_fore	inner_hind	1.17	8			181	15	20	U0	ULO	L	251	c	0	3	10	inner_fore	inner_hind	1.14	4.47214				181	15
182	15	0.0221504	U0	ULO	L	c	0	3	10	inner_fore	1.2		182	15	68	U0	ULO	L	241	c	0	3	10	inner_fore	inner_hind	1.16	8.24621			182	15	22	U0	ULO	L	252	c	0	3	10	inner_fore	inner_hind	1.19	4.69042				182	15
183	17	0.0253958	U0	ULO	L	c	0	1	2	inner_fore	1.24		183	15	62	U0	ULO	L	242	c	0	3	10	inner_fore	inner_hind	1.15	7.87401			183	15	25	U0	ULO	L	253	c	0	3	10	inner_fore	inner_hind	1.16	5				183	15
184	17	0.0207527	U0	ULO	L	c	0	1	2	inner_fore	1.25		184	15	70	U0	ULO	L	244	c	0	3	10	inner_fore	inner_hind	1.2	8.3666			184	15	25	U0	ULO	L	254	c	0	3	10	inner_fore	inner_hind	1.17	5				184	15
185	17	0.0223696	U0	ULO	L	c	0	1	2	inner_fore	1.21		185	15	63	U0	ULO	L	245	c	0	3	10	inner_fore	inner_hind	1.14	7.93725			185	15	22	U0	ULO	L	255	c	0	3	10	inner_fore	inner_hind	1.16	4.69042				185	15
186	17	0.0167896	U0	ULO	L	c	0	1	2	inner_fore	1.23		186	15	72	U0	ULO	L	248	c	0	3	10	inner_fore	inner_hind	1.2	8.48528			186	15	24	U0	ULO	L	256	c	0	3	10	inner_fore	inner_hind	1.16	4.89898				186	15
187	17	0.0162372	U0	ULO	L	c	0	1	2	inner_fore	1.25		187	15	73	U0	ULO	L	249	c	0	3	10	inner_fore	inner_hind	1.1	8.544			187	15	20	U0	ULO	L	257	c	0	3	10	inner_fore	inner_hind	1.16	4.47214				187	15
188	17	0.0235791	U0	ULO	L	c	0	1	2	inner_fore	1.3		188	15	66	U0	ULO	L	250	c	0	3	10	inner_fore	inner_hind	1.08	8.12404			188	15	19	U0	ULO	L	259	c	0	3	10	inner_fore	inner_hind	1.22	4.3589				188	15
189	17	0.0286443	U0	ULO	L	c	0	1	2	inner_fore	1.24		189	15	65	U0	ULO	L	251	c	0	3	10	inner_fore	inner_hind	1.14	8.06226			189	15	17	U0	ULO	L	260	c	0	3	10	inner_fore	inner_hind	1.19	4.12311				189	15
190	17	0.0228419	U0	ULO	L	c	0	1	2	inner_fore	1.28		190	15	66	U0	ULO	L	252	c	0	3	10	inner_fore	inner_hind	1.19	8.12404			190	15	18	U0	ULO	L	261	c	0	3	10	inner_fore	inner_hind	1.19	4.24264				190	15
191	17	0.0230907	U0	ULO	L	c	0	1	2	inner_fore	1.26		191	15	67	U0	ULO	L	253	c	0	3	10	inner_fore	inner_hind	1.16	8.18535			191	15	23	U0	ULO	L	262	c	0	3	10	inner_fore	inner_hind	1.2	4.79583				191	15
192	17	0.0181078	U0	ULO	L	c	0	1	2	inner_fore	1.26		192	15	68	U0	ULO	L	254	c	0	3	10	inner_fore	inner_hind	1.17	8.24621			192	15	28	U0	ULO	L	263	c	0	3	10	inner_fore	inner_hind	1.18	5.2915				192	15
193	17	0.0220803	U0	ULO	L	c	0	1	2	inner_fore	1.29		193	15	70	U0	ULO	L	255	c	0	3	10	inner_fore	inner_hind	1.16	8.3666			193	15	25	U0	ULO	L	264	c	0	3	10	inner_fore	inner_hind	1.2	5				193	15
194	17	0.0252707	U0	ULO	L	c	0	1	2	inner_fore	1.22		194	15	87	U0	ULO	L	257	c	0	3	10	inner_fore	inner_hind	1.16	9.32738			194	17	18	U0	ULO	L	285	c	0	1	2	inner_fore	inner_hind	1.24	4.24264				194	15
195	17	0.0191574	U0	ULO	L	c	0	1	2	inner_fore	1.16		195	15	80	U0	ULO	L	259	c	0	3	10	inner_fore	inner_hind	1.22	8.94427			195	17	19	U0	ULO	L	286	c	0	1	2	inner_fore	inner_hind	1.24	4.3589				195	15
196	17	0.0191758	U0	ULO	L	c	0	1	2	inner_fore	1.21		196	15	71	U0	ULO	L	260	c	0	3	10	inner_fore	inner_hind	1.19	8.42615			196	17	19	U0	ULO	L	287	c	0	1	2	inner_fore	inner_hind	1.25	4.3589				196	15
197	17	0.0254081	U0	ULO	L	c	0	1	2	inner_fore	1.27		197	15	78	U0	ULO	L	261	c	0	3	10	inner_fore	inner_hind	1.19	8.83176			197	17	20	U0	ULO	L	288	c	0	1	2	inner_fore	inner_hind	1.21	4.47214				197	15
198	17	0.0257157	U0	ULO	L	c	0	1	2	inner_fore	1.27		198	15	78	U0	ULO	L	262	c	0	3	10	inner_fore	inner_hind	1.2	8.83176			198	17	19	U0	ULO	L	289	c	0	1	2	inner_fore	inner_hind	1.23	4.3589				198	15
199	17	0.0221264	U0	ULO	L	c	0	1	2	inner_fore	1.29		199	15	79	U0	ULO	L	263	c	0	3	10	inner_fore	inner_hind	1.18	8.88819			199	17	19	U0	ULO	L	290	c	0	1	2	inner_fore	inner_hind	1.25	4.3589				199	15
200	17	0.0145734	U0	ULO	L	c	0	1	2	inner_fore	1.23		200	15	71	U0	ULO	L	264	c	0	3	10	inner_fore	inner_hind	1.2	8.42615			200	17	23	U0	ULO	L	291	c	0	1	2	inner_fore	inner_hind	1.3	4.79583				200	15
201	17	0.020976	U0	ULO	L	c	0	1	2	inner_fore	1.28		201	17	77	U0	ULO	L	286	c	0	1	2	inner_fore	inner_hind	1.24	8.77496			201	17	22	U0	ULO	L	292	c	0	1	2	inner_fore	inner_hind	1.24	4.69042				201	17
202	1	0.0179384	U0	URO	R	c	0	1	1	outer_fore	1.33		202	17	63	U0	ULO	L	287	c	0	1	2	inner_fore	inner_hind	1.25	7.93725			202	17	22	U0	ULO	L	293	c	0	1	2	inner_fore	inner_hind	1.28	4.69042				202	17
203	1	0.0239576	U0	URO	R	c	0	1	1	outer_fore	1.35		203	17	65	U0	ULO	L	288	c	0	1	2	inner_fore	inner_hind	1.21	8.06226			203	17	20	U0	ULO	L	294	c	0	1	2	inner_fore	inner_hind	1.26	4.47214				203	17
204	1	0.0229077	U0	URO	R	c	0	1	1	outer_fore	1.35		204	17	81	U0	ULO	L	289	c	0	1	2	inner_fore	inner_hind	1.23	9			204	17	20	U0	ULO	L	295	c	0	1	2	inner_fore	inner_hind	1.26	4.47214				204	17
205	1	0.0228665	U0	URO	R	c	0	1	1	outer_fore	1.34		205	17	81	U0	ULO	L	290	c	0	1	2	inner_fore	inner_hind	1.25	9			205	17	21	U0	ULO	L	296	c	0	1	2	inner_fore	inner_hind	1.29	4.58258				205	17
206	1	0.0261953	U0	URO	R	c	0	1	1	outer_fore	1.37		206	17	79	U0	ULO	L	291	c	0	1	2	inner_fore	inner_hind	1.3	8.88819			206	17	17	U0	ULO	L	297	c	0	1	2	inner_fore	inner_hind	1.22	4.12311				206	17
207	1	0.0269357	U0	URO	R	c	0	1	1	outer_fore	1.36		207	17	90	U0	ULO	L	292	c	0	1	2	inner_fore	inner_hind	1.24	9.48683			207	17	18	U0	ULO	L	298	c	0	1	2	inner_fore	inner_hind	1.16	4.24264				207	17
208	1	0.0235931	U0	URO	R	c	0	1	1	outer_fore	1.4		208	17	79	U0	ULO	L	293	c	0	1	2	inner_fore	inner_hind	1.28	8.88819			208	17	21	U0	ULO	L	299	c	0	1	2	inner_fore	inner_hind	1.21	4.58258				208	17
209	1	0.0184684	U0	URO	R	c	0	1	1	outer_fore	1.39		209	17	65	U0	ULO	L	294	c	0	1	2	inner_fore	inner_hind	1.26	8.06226			209	17	27	U0	ULO	L	300	c	0	1	2	inner_fore	inner_hind	1.27	5.19615				209	17
210	1	0.0196077	U0	URO	R	c	0	1	1	outer_fore	1.37		210	17	82	U0	ULO	L	295	c	0	1	2	inner_fore	inner_hind	1.26	9.05539			210	17	21	U0	ULO	L	301	c	0	1	2	inner_fore	inner_hind	1.27	4.58258				210	17
211	1	0.0194583	U0	URO	R	c	0	1	1	outer_fore	1.3		211	17	82	U0	ULO	L	296	c	0	1	2	inner_fore	inner_hind	1.29	9.05539			211	17	21	U0	ULO	L	302	c	0	1	2	inner_fore	inner_hind	1.29	4.58258				211	17
212	1	0.0320903	U0	URO	R	c	0	1	1	outer_fore	1.36		212	17	78	U0	ULO	L	297	c	0	1	2	inner_fore	inner_hind	1.22	8.83176			212	17	17	U0	ULO	L	303	c	0	1	2	inner_fore	inner_hind	1.23	4.12311				212	17
213	1	0.0279883	U0	URO	R	c	0	1	1	outer_fore	1.36		213	17	65	U0	ULO	L	298	c	0	1	2	inner_fore	inner_hind	1.16	8.06226			213	17	22	U0	ULO	L	304	c	0	1	2	inner_fore	inner_hind	1.28	4.69042				213	17
214	1	0.0220455	U0	URO	R	c	0	1	1	outer_fore	1.37		214	17	84	U0	ULO	L	299	c	0	1	2	inner_fore	inner_hind	1.21	9.16515			214	1	34	U0	URO	R	352	c	0	1	1	outer_fore	outer_hind	1.33	5.83095				214	17
215	2	0.019875	U0	URO	R	c	0	3	2	outer_fore	1.34		215	17	88	U0	ULO	L	300	c	0	1	2	inner_fore	inner_hind	1.27	9.38083			215	1	36	U0	URO	R	353	c	0	1	1	outer_fore	outer_hind	1.35	6				215	17
216	2	0.0257347	U0	URO	R	c	0	3	2	outer_fore	1.29		216	17	81	U0	ULO	L	301	c	0	1	2	inner_fore	inner_hind	1.27	9			216	1	35	U0	URO	R	354	c	0	1	1	outer_fore	outer_hind	1.35	5.91608				216	17
217	2	0.0297957	U0	URO	R	c	0	3	2	outer_fore	1.32		217	17	77	U0	ULO	L	302	c	0	1	2	inner_fore	inner_hind	1.29	8.77496			217	1	34	U0	URO	R	355	c	0	1	1	outer_fore	outer_hind	1.34	5.83095				217	17
218	2	0.0263152	U0	URO	R	c	0	3	2	outer_fore	1.39		218	17	63	U0	ULO	L	303	c	0	1	2	inner_fore	inner_hind	1.23	7.93725			218	1	33	U0	URO	R	356	c	0	1	1	outer_fore	outer_hind	1.37	5.74456				218	17
219	2	0.0170722	U0	URO	R	c	0	3	2	outer_fore	1.4		219	17	68	U0	ULO	L	304	c	0	1	2	inner_fore	inner_hind	1.28	8.24621			219	1	32	U0	URO	R	357	c	0	1	1	outer_fore	outer_hind	1.36	5.65685				219	17
220	2	0.0203118	U0	URO	R	c	0	3	2	outer_fore	1.41		220	1	84	U0	URO	R	352	c	0	1	1	outer_fore	outer_hind	1.33	9.16515			220	1	34	U0	URO	R	358	c	0	1	1	outer_fore	outer_hind	1.4	5.83095				220	1
221	2	0.0193624	U0	URO	R	c	0	3	2	outer_fore	1.32		221	1	77	U0	URO	R	353	c	0	1	1	outer_fore	outer_hind	1.35	8.77496			221	1	34	U0	URO	R	359	c	0	1	1	outer_fore	outer_hind	1.39	5.83095				221	1
222	3	0.0172719	U0	URO	R	c	0	2	3	outer_fore	1.44		222	1	90	U0	URO	R	354	c	0	1	1	outer_fore	outer_hind	1.35	9.48683			222	1	32	U0	URO	R	360	c	0	1	1	outer_fore	outer_hind	1.37	5.65685				222	1
223	3	0.0238785	U0	URO	R	c	0	2	3	outer_fore	1.43		223	1	83	U0	URO	R	355	c	0	1	1	outer_fore	outer_hind	1.34	9.11043			223	1	34	U0	URO	R	361	c	0	1	1	outer_fore	outer_hind	1.3	5.83095				223	1
224	3	0.0220069	U0	URO	R	c	0	2	3	outer_fore	1.49		224	1	83	U0	URO	R	356	c	0	1	1	outer_fore	outer_hind	1.37	9.11043			224	1	36	U0	URO	R	362	c	0	1	1	outer_fore	outer_hind	1.36	6				224	1
225	3	0.0125477	U0	URO	R	c	0	2	3	outer_fore	1.62		225	1	88	U0	URO	R	357	c	0	1	1	outer_fore	outer_hind	1.36	9.38083			225	1	36	U0	URO	R	363	c	0	1	1	outer_fore	outer_hind	1.36	6				225	1
226	3	0.0167773	U0	URO	R	c	0	2	3	outer_fore	1.52		226	1	83	U0	URO	R	358	c	0	1	1	outer_fore	outer_hind	1.4	9.11043			226	1	35	U0	URO	R	364	c	0	1	1	outer_fore	outer_hind	1.37	5.91608				226	1
227	3	0.0179655	U0	URO	R	c	0	2	3	outer_fore	1.51		227	1	80	U0	URO	R	359	c	0	1	1	outer_fore	outer_hind	1.39	8.94427			227	2	26	U0	URO	R	365	c	0	3	2	outer_fore	outer_hind	1.34	5.09902				227	1
228	4	0.0223005	U0	URO	R	c	0	2	4	outer_fore	1.33		228	1	80	U0	URO	R	360	c	0	1	1	outer_fore	outer_hind	1.37	8.94427			228	2	23	U0	URO	R	366	c	0	3	2	outer_fore	outer_hind	1.29	4.79583				228	1
229	4	0.0213251	U0	URO	R	c	0	2	4	outer_fore	1.27		229	1	79	U0	URO	R	361	c	0	1	1	outer_fore	outer_hind	1.3	8.88819			229	2	26	U0	URO	R	367	c	0	3	2	outer_fore	outer_hind	1.32	5.09902				229	1
230	4	0.011806	U0	URO	R	c	0	2	4	outer_fore	1.39		230	1	90	U0	URO	R	362	c	0	1	1	outer_fore	outer_hind	1.36	9.48683			230	2	24	U0	URO	R	368	c	0	3	2	outer_fore	outer_hind	1.39	4.89898				230	1
231	4	0.0056103	U0	URO	R	c	0	2	4	outer_fore	1.41		231	1	92	U0	URO	R	363	c	0	1	1	outer_fore	outer_hind	1.36	9.59166			231	2	27	U0	URO	R	369	c	0	3	2	outer_fore	outer_hind	1.4	5.19615				231	1
232	4	0.018898	U0	URO	R	c	0	2	4	outer_fore	1.23		232	1	81	U0	URO	R	364	c	0	1	1	outer_fore	outer_hind	1.37	9			232	2	25	U0	URO	R	370	c	0	3	2	outer_fore	outer_hind	1.41	5				232	1
233	4	0.0259261	U0	URO	R	c	0	2	4	outer_fore	1.29		233	2	75	U0	URO	R	365	c	0	3	2	outer_fore	outer_hind	1.34	8.66025			233	2	27	U0	URO	R	371	c	0	3	2	outer_fore	outer_hind	1.32	5.19615				233	2
234	4	0.017558	U0	URO	R	c	0	2	4	outer_fore	1.3		234	2	74	U0	URO	R	366	c	0	3	2	outer_fore	outer_hind	1.29	8.60233			234	3	29	U0	URO	R	372	c	0	2	3	outer_fore	outer_hind	1.44	5.38516				234	2
235	5	0.0165098	U0	URO	R	c	0	4	5	outer_fore	1.38		235	2	71	U0	URO	R	367	c	0	3	2	outer_fore	outer_hind	1.32	8.42615			235	3	27	U0	URO	R	373	c	0	2	3	outer_fore	outer_hind	1.43	5.19615				235	2
236	5	0.0155968	U0	URO	R	c	0	4	5	outer_fore	1.37		236	2	70	U0	URO	R	368	c	0	3	2	outer_fore	outer_hind	1.39	8.3666			236	3	25	U0	URO	R	374	c	0	2	3	outer_fore	outer_hind	1.49	5				236	2
237	5	0.0114803	U0	URO	R	c	0	4	5	outer_fore	1.39		237	2	76	U0	URO	R	369	c	0	3	2	outer_fore	outer_hind	1.4	8.7178			237	3	28	U0	URO	R	375	c	0	2	3	outer_fore	outer_hind	1.62	5.2915				237	2
238	5	0.00977831	U0	URO	R	c	0	4	5	outer_fore	1.31		238	2	75	U0	URO	R	370	c	0	3	2	outer_fore	outer_hind	1.41	8.66025			238	3	29	U0	URO	R	377	c	0	2	3	outer_fore	outer_hind	1.52	5.38516				238	2
239	5	0.0117984	U0	URO	R	c	0	4	5	outer_fore	1.4		239	2	75	U0	URO	R	371	c	0	3	2	outer_fore	outer_hind	1.32	8.66025			239	3	28	U0	URO	R	378	c	0	2	3	outer_fore	outer_hind	1.51	5.2915				239	2
240	5	0.0112582	U0	URO	R	c	0	4	5	outer_fore	1.47		240	3	76	U0	URO	R	372	c	0	2	3	outer_fore	outer_hind	1.44	8.7178			240	3	31	U0	URO	R	379	c	0	2	3	outer_fore	outer_hind	1.5	5.56776				240	3
241	5	0.00935403	U0	URO	R	c	0	4	5	outer_fore	1.44		241	3	77	U0	URO	R	373	c	0	2	3	outer_fore	outer_hind	1.43	8.77496			241	3	30	U0	URO	R	380	c	0	2	3	outer_fore	outer_hind	1.46	5.47723				241	3
242	5	0.00889916	U0	URO	R	c	0	4	5	outer_fore	1.45		242	3	77	U0	URO	R	374	c	0	2	3	outer_fore	outer_hind	1.49	8.77496			242	3	31	U0	URO	R	381	c	0	2	3	outer_fore	outer_hind	1.52	5.56776				242	3
243	5	0.0095514	U0	URO	R	c	0	4	5	outer_fore	1.42		243	3	67	U0	URO	R	375	c	0	2	3	outer_fore	outer_hind	1.62	8.18535			243	4	30	U0	URO	R	384	c	0	2	4	outer_fore	outer_hind	1.33	5.47723				243	3
244	7	0.0189609	U0	URO	R	c	0	1	6	outer_fore	1.26		244	3	73	U0	URO	R	377	c	0	2	3	outer_fore	outer_hind	1.52	8.544			244	4	31	U0	URO	R	385	c	0	2	4	outer_fore	outer_hind	1.27	5.56776				244	3
245	7	0.0307556	U0	URO	R	c	0	1	6	outer_fore	1.27		245	3	77	U0	URO	R	378	c	0	2	3	outer_fore	outer_hind	1.51	8.77496			245	4	32	U0	URO	R	387	c	0	2	4	outer_fore	outer_hind	1.39	5.65685				245	3
246	7	0.0272361	U0	URO	R	c	0	1	6	outer_fore	1.25		246	4	71	U0	URO	R	384	c	0	2	4	outer_fore	outer_hind	1.33	8.42615			246	4	33	U0	URO	R	389	c	0	2	4	outer_fore	outer_hind	1.36	5.74456				246	4
247	7	0.0292639	U0	URO	R	c	0	1	6	outer_fore	1.24		247	4	77	U0	URO	R	385	c	0	2	4	outer_fore	outer_hind	1.27	8.77496			247	4	13	U0	URO	R	390	c	0	2	4	outer_fore	outer_hind	1.41	3.60555				247	4
248	7	0.0291699	U0	URO	R	c	0	1	6	outer_fore	1.25		248	4	74	U0	URO	R	387	c	0	2	4	outer_fore	outer_hind	1.39	8.60233			248	4	28	U0	URO	R	392	c	0	2	4	outer_fore	outer_hind	1.23	5.2915				248	4
249	7	0.0158658	U0	URO	R	c	0	1	6	outer_fore	1.29		249	4	71	U0	URO	R	388	c	0	2	4	outer_fore	outer_hind	1.29	8.42615			249	4	28	U0	URO	R	393	c	0	2	4	outer_fore	outer_hind	1.29	5.2915				249	4
250	7	0.0456769	U0	URO	R	c	0	1	6	outer_fore	1.29		250	4	85	U0	URO	R	390	c	0	2	4	outer_fore	outer_hind	1.41	9.21954			250	4	24	U0	URO	R	394	c	0	2	4	outer_fore	outer_hind	1.3	4.89898				250	4
251	7	0.0256283	U0	URO	R	c	0	1	6	outer_fore	1.28		251	4	89	U0	URO	R	391	c	0	2	4	outer_fore	outer_hind	1.32	9.43398			251	5	27	U0	URO	R	395	c	0	4	5	outer_fore	outer_hind	1.38	5.19615				251	4
252	8	0.0113678	U0	URO	R	c	0	5	5	outer_fore	1.11		252	4	88	U0	URO	R	392	c	0	2	4	outer_fore	outer_hind	1.23	9.38083			252	5	31	U0	URO	R	396	c	0	4	5	outer_fore	outer_hind	1.37	5.56776				252	4
253	8	0.0114584	U0	URO	R	c	0	5	5	outer_fore	1.21		253	4	76	U0	URO	R	393	c	0	2	4	outer_fore	outer_hind	1.29	8.7178			253	5	28	U0	URO	R	397	c	0	4	5	outer_fore	outer_hind	1.39	5.2915				253	4
254	8	0.0135014	U0	URO	R	c	0	5	5	outer_fore	1.18		254	4	72	U0	URO	R	394	c	0	2	4	outer_fore	outer_hind	1.3	8.48528			254	5	25	U0	URO	R	398	c	0	4	5	outer_fore	outer_hind	1.31	5				254	4
255	8	0.0120792	U0	URO	R	c	0	5	5	outer_fore	1.22		255	5	70	U0	URO	R	395	c	0	4	5	outer_fore	outer_hind	1.38	8.3666			255	5	28	U0	URO	R	399	c	0	4	5	outer_fore	outer_hind	1.4	5.2915				255	5
256	8	0.0115779	U0	URO	R	c	0	5	5	outer_fore	1.21		256	5	70	U0	URO	R	396	c	0	4	5	outer_fore	outer_hind	1.37	8.3666			256	5	32	U0	URO	R	401	c	0	4	5	outer_fore	outer_hind	1.47	5.65685				256	5
257	8	0.011435	U0	URO	R	c	0	5	5	outer_fore	1.26		257	5	71	U0	URO	R	397	c	0	4	5	outer_fore	outer_hind	1.39	8.42615			257	5	28	U0	URO	R	403	c	0	4	5	outer_fore	outer_hind	1.44	5.2915				257	5
258	8	0.0101804	U0	URO	R	c	0	5	5	outer_fore	1.26		258	5	72	U0	URO	R	398	c	0	4	5	outer_fore	outer_hind	1.31	8.48528			258	5	30	U0	URO	R	405	c	0	4	5	outer_fore	outer_hind	1.45	5.47723				258	5
259	8	0.0138422	U0	URO	R	c	0	5	5	outer_fore	1.28		259	5	74	U0	URO	R	399	c	0	4	5	outer_fore	outer_hind	1.4	8.60233			259	5	28	U0	URO	R	407	c	0	4	5	outer_fore	outer_hind	1.42	5.2915				259	5
260	8	0.0117479	U0	URO	R	c	0	5	5	outer_fore	1.15		260	5	74	U0	URO	R	400	c	0	4	5	outer_fore	outer_hind	1.45	8.60233			260	7	17	U0	URO	R	422	c	0	1	6	outer_fore	outer_hind	1.26	4.12311				260	5
261	9	0.0202745	U0	URO	R	c	0	3	6	outer_fore	1.21		261	5	77	U0	URO	R	401	c	0	4	5	outer_fore	outer_hind	1.47	8.77496			261	7	18	U0	URO	R	423	c	0	1	6	outer_fore	outer_hind	1.27	4.24264				261	5
262	9	0.0146765	U0	URO	R	c	0	3	6	outer_fore	1.2		262	5	76	U0	URO	R	403	c	0	4	5	outer_fore	outer_hind	1.44	8.7178			262	7	20	U0	URO	R	424	c	0	1	6	outer_fore	outer_hind	1.25	4.47214				262	5
263	9	0.0198686	U0	URO	R	c	0	3	6	outer_fore	1.17		263	5	66	U0	URO	R	405	c	0	4	5	outer_fore	outer_hind	1.45	8.12404			263	7	17	U0	URO	R	425	c	0	1	6	outer_fore	outer_hind	1.24	4.12311				263	5
264	9	0.0158547	U0	URO	R	c	0	3	6	outer_fore	1.22		264	5	68	U0	URO	R	407	c	0	4	5	outer_fore	outer_hind	1.42	8.24621			264	7	19	U0	URO	R	426	c	0	1	6	outer_fore	outer_hind	1.25	4.3589				264	5
265	9	0.0232276	U0	URO	R	c	0	3	6	outer_fore	1.23		265	7	79	U0	URO	R	422	c	0	1	6	outer_fore	outer_hind	1.26	8.88819			265	7	23	U0	URO	R	427	c	0	1	6	outer_fore	outer_hind	1.29	4.79583				265	7
266	9	0.0131558	U0	URO	R	c	0	3	6	outer_fore	1.19		266	7	83	U0	URO	R	423	c	0	1	6	outer_fore	outer_hind	1.27	9.11043			266	7	17	U0	URO	R	428	c	0	1	6	outer_fore	outer_hind	1.29	4.12311				266	7
267	9	0.0243706	U0	URO	R	c	0	3	6	outer_fore	1.16		267	7	81	U0	URO	R	424	c	0	1	6	outer_fore	outer_hind	1.25	9			267	7	22	U0	URO	R	430	c	0	1	6	outer_fore	outer_hind	1.28	4.69042				267	7
268	9	0.0171164	U0	URO	R	c	0	3	6	outer_fore	1.17		268	7	78	U0	URO	R	425	c	0	1	6	outer_fore	outer_hind	1.24	8.83176			268	8	15	U0	URO	R	432	c	0	5	5	outer_fore	outer_hind	1.11	3.87298				268	7
269	9	0.0267901	U0	URO	R	c	0	3	6	outer_fore	1.22		269	7	80	U0	URO	R	426	c	0	1	6	outer_fore	outer_hind	1.25	8.94427			269	8	29	U0	URO	R	433	c	0	5	5	outer_fore	outer_hind	1.22	5.38516				269	7
270	9	0.0298453	U0	URO	R	c	0	3	6	outer_fore	1.25		270	7	76	U0	URO	R	427	c	0	1	6	outer_fore	outer_hind	1.29	8.7178			270	8	27	U0	URO	R	434	c	0	5	5	outer_fore	outer_hind	1.21	5.19615				270	7
271	9	0.027563	U0	URO	R	c	0	3	6	outer_fore	1.18		271	7	82	U0	URO	R	428	c	0	1	6	outer_fore	outer_hind	1.29	9.05539			271	8	28	U0	URO	R	435	c	0	5	5	outer_fore	outer_hind	1.18	5.2915				271	7
272	9	0.0161788	U0	URO	R	c	0	3	6	outer_fore	1.22		272	7	75	U0	URO	R	429	c	0	1	6	outer_fore	outer_hind	1.27	8.66025			272	8	31	U0	URO	R	436	c	0	5	5	outer_fore	outer_hind	1.21	5.56776				272	7
273	9	0.0217308	U0	URO	R	c	0	3	6	outer_fore	1.21		273	7	79	U0	URO	R	430	c	0	1	6	outer_fore	outer_hind	1.28	8.88819			273	8	26	U0	URO	R	437	c	0	5	5	outer_fore	outer_hind	1.26	5.09902				273	7
274	9	0.0200838	U0	URO	R	c	0	3	6	outer_fore	1.21		274	8	69	U0	URO	R	432	c	0	5	5	outer_fore	outer_hind	1.11	8.30662			274	8	30	U0	URO	R	438	c	0	5	5	outer_fore	outer_hind	1.22	5.47723				274	8
275	9	0.0204944	U0	URO	R	c	0	3	6	outer_fore	1.23		275	8	68	U0	URO	R	434	c	0	5	5	outer_fore	outer_hind	1.21	8.24621			275	8	29	U0	URO	R	439	c	0	5	5	outer_fore	outer_hind	1.21	5.38516				275	8
276	9	0.0143473	U0	URO	R	c	0	3	6	outer_fore	1.2		276	8	84	U0	URO	R	435	c	0	5	5	outer_fore	outer_hind	1.18	9.16515			276	8	28	U0	URO	R	441	c	0	5	5	outer_fore	outer_hind	1.26	5.2915				276	8
277	9	0.0143895	U0	URO	R	c	0	3	6	outer_fore	1.25		277	8	72	U0	URO	R	438	c	0	5	5	outer_fore	outer_hind	1.22	8.48528			277	8	28	U0	URO	R	442	c	0	5	5	outer_fore	outer_hind	1.26	5.2915				277	8
278	9	0.020073	U0	URO	R	c	0	3	6	outer_fore	1.25		278	8	70	U0	URO	R	439	c	0	5	5	outer_fore	outer_hind	1.21	8.3666			278	8	26	U0	URO	R	443	c	0	5	5	outer_fore	outer_hind	1.28	5.09902				278	8
279	9	0.0250764	U0	URO	R	c	0	3	6	outer_fore	1.2		279	8	74	U0	URO	R	441	c	0	5	5	outer_fore	outer_hind	1.26	8.60233			279	8	19	U0	URO	R	444	c	0	5	5	outer_fore	outer_hind	1.15	4.3589				279	8
280	9	0.0181891	U0	URO	R	c	0	3	6	outer_fore	1.15		280	8	75	U0	URO	R	442	c	0	5	5	outer_fore	outer_hind	1.26	8.66025			280	8	30	U0	URO	R	445	c	0	5	5	outer_fore	outer_hind	1.26	5.47723				280	8
281	10	0.0127707	U0	URO	R	c	0	5	7	outer_fore	1.36		281	8	69	U0	URO	R	443	c	0	5	5	outer_fore	outer_hind	1.28	8.30662			281	8	31	U0	URO	R	446	c	0	5	5	outer_fore	outer_hind	1.3	5.56776				281	8
282	10	0.00600745	U0	URO	R	c	0	5	7	outer_fore	1.37		282	8	77	U0	URO	R	444	c	0	5	5	outer_fore	outer_hind	1.15	8.77496			282	9	25	U0	URO	R	447	c	0	3	6	outer_fore	outer_hind	1.25	5				282	8
283	10	0.00931213	U0	URO	R	c	0	5	7	outer_fore	1.38		283	9	84	U0	URO	R	448	c	0	3	6	outer_fore	outer_hind	1.21	9.16515			283	9	21	U0	URO	R	448	c	0	3	6	outer_fore	outer_hind	1.21	4.58258				283	9
284	10	0.0151029	U0	URO	R	c	0	5	7	outer_fore	1.4		284	9	76	U0	URO	R	450	c	0	3	6	outer_fore	outer_hind	1.2	8.7178			284	9	26	U0	URO	R	449	c	0	3	6	outer_fore	outer_hind	1.2	5.09902				284	9
285	11	0.011745	U0	URO	R	c	0	3	1	outer_fore	1.28		285	9	80	U0	URO	R	451	c	0	3	6	outer_fore	outer_hind	1.17	8.94427			285	9	21	U0	URO	R	450	c	0	3	6	outer_fore	outer_hind	1.2	4.58258				285	9
286	11	0.0169791	U0	URO	R	c	0	3	1	outer_fore	1.31		286	9	73	U0	URO	R	453	c	0	3	6	outer_fore	outer_hind	1.22	8.544			286	9	23	U0	URO	R	451	c	0	3	6	outer_fore	outer_hind	1.17	4.79583				286	9
287	11	0.0138395	U0	URO	R	c	0	3	1	outer_fore	1.31		287	9	79	U0	URO	R	454	c	0	3	6	outer_fore	outer_hind	1.23	8.88819			287	9	24	U0	URO	R	452	c	0	3	6	outer_fore	outer_hind	1.22	4.89898				287	9
288	11	0.00835783	U0	URO	R	c	0	3	1	outer_fore	1.29		288	9	78	U0	URO	R	455	c	0	3	6	outer_fore	outer_hind	1.19	8.83176			288	9	24	U0	URO	R	453	c	0	3	6	outer_fore	outer_hind	1.22	4.89898				288	9
289	11	0.0143809	U0	URO	R	c	0	3	1	outer_fore	1.29		289	9	73	U0	URO	R	457	c	0	3	6	outer_fore	outer_hind	1.16	8.544			289	9	23	U0	URO	R	454	c	0	3	6	outer_fore	outer_hind	1.23	4.79583				289	9
290	11	0.00908877	U0	URO	R	c	0	3	1	outer_fore	1.27		290	9	72	U0	URO	R	458	c	0	3	6	outer_fore	outer_hind	1.17	8.48528			290	9	19	U0	URO	R	455	c	0	3	6	outer_fore	outer_hind	1.19	4.3589				290	9
291	11	0.0104361	U0	URO	R	c	0	3	1	outer_fore	1.25		291	9	80	U0	URO	R	459	c	0	3	6	outer_fore	outer_hind	1.22	8.94427			291	9	19	U0	URO	R	457	c	0	3	6	outer_fore	outer_hind	1.16	4.3589				291	9
292	11	0.0119263	U0	URO	R	c	0	3	1	outer_fore	1.3		292	9	72	U0	URO	R	460	c	0	3	6	outer_fore	outer_hind	1.25	8.48528			292	9	18	U0	URO	R	458	c	0	3	6	outer_fore	outer_hind	1.17	4.24264				292	9
293	11	0.0184212	U0	URO	R	c	0	3	1	outer_fore	1.26		293	9	76	U0	URO	R	461	c	0	3	6	outer_fore	outer_hind	1.18	8.7178			293	9	21	U0	URO	R	459	c	0	3	6	outer_fore	outer_hind	1.22	4.58258				293	9
294	11	0.0123167	U0	URO	R	c	0	3	1	outer_fore	1.24		294	9	77	U0	URO	R	462	c	0	3	6	outer_fore	outer_hind	1.22	8.77496			294	9	18	U0	URO	R	460	c	0	3	6	outer_fore	outer_hind	1.25	4.24264				294	9
295	11	0.0131433	U0	URO	R	c	0	3	1	outer_fore	1.31		295	9	82	U0	URO	R	463	c	0	3	6	outer_fore	outer_hind	1.21	9.05539			295	9	24	U0	URO	R	461	c	0	3	6	outer_fore	outer_hind	1.18	4.89898				295	9
296	11	0.011406	U0	URO	R	c	0	3	1	outer_fore	1.35		296	9	78	U0	URO	R	465	c	0	3	6	outer_fore	outer_hind	1.21	8.83176			296	9	22	U0	URO	R	462	c	0	3	6	outer_fore	outer_hind	1.22	4.69042				296	9
297	11	0.0144825	U0	URO	R	c	0	3	1	outer_fore	1.32		297	9	77	U0	URO	R	467	c	0	3	6	outer_fore	outer_hind	1.23	8.77496			297	9	22	U0	URO	R	463	c	0	3	6	outer_fore	outer_hind	1.21	4.69042				297	9
298	11	0.0136822	U0	URO	R	c	0	3	1	outer_fore	1.23		298	9	82	U0	URO	R	468	c	0	3	6	outer_fore	outer_hind	1.2	9.05539			298	9	23	U0	URO	R	464	c	0	3	6	outer_fore	outer_hind	1.17	4.79583				298	9
299	11	0.0185179	U0	URO	R	c	0	3	1	outer_fore	1.2		299	9	78	U0	URO	R	469	c	0	3	6	outer_fore	outer_hind	1.25	8.83176			299	9	26	U0	URO	R	465	c	0	3	6	outer_fore	outer_hind	1.21	5.09902				299	9
300	11	0.0206298	U0	URO	R	c	0	3	1	outer_fore	1.22		300	9	76	U0	URO	R	470	c	0	3	6	outer_fore	outer_hind	1.25	8.7178			300	9	24	U0	URO	R	466	c	0	3	6	outer_fore	outer_hind	1.21	4.89898				300	9
301	11	0.0150117	U0	URO	R	c	0	3	1	outer_fore	1.2		301	9	79	U0	URO	R	471	c	0	3	6	outer_fore	outer_hind	1.2	8.88819			301	9	22	U0	URO	R	467	c	0	3	6	outer_fore	outer_hind	1.23	4.69042				301	9
302	12	0.0228941	U0	URO	R	c	0	1	8	outer_fore	1.15		302	9	79	U0	URO	R	472	c	0	3	6	outer_fore	outer_hind	1.15	8.88819			302	9	21	U0	URO	R	468	c	0	3	6	outer_fore	outer_hind	1.2	4.58258				302	9
303	12	0.0180032	U0	URO	R	c	0	1	8	outer_fore	1.2		303	10	72	U0	URO	R	475	c	0	5	7	outer_fore	outer_hind	1.36	8.48528			303	9	22	U0	URO	R	469	c	0	3	6	outer_fore	outer_hind	1.25	4.69042				303	10
304	12	0.016104	U0	URO	R	c	0	1	8	outer_fore	1.19		304	10	74	U0	URO	R	482	c	0	5	7	outer_fore	outer_hind	1.37	8.60233			304	9	19	U0	URO	R	470	c	0	3	6	outer_fore	outer_hind	1.25	4.3589				304	10
305	12	0.0233416	U0	URO	R	c	0	1	8	outer_fore	1.18		305	10	81	U0	URO	R	487	c	0	5	7	outer_fore	outer_hind	1.38	9			305	9	18	U0	URO	R	471	c	0	3	6	outer_fore	outer_hind	1.2	4.24264				305	10
306	12	0.0257103	U0	URO	R	c	0	1	8	outer_fore	1.19		306	10	74	U0	URO	R	488	c	0	5	7	outer_fore	outer_hind	1.4	8.60233			306	9	20	U0	URO	R	472	c	0	3	6	outer_fore	outer_hind	1.15	4.47214				306	10
307	12	0.0152561	U0	URO	R	c	0	1	8	outer_fore	1.25		307	11	76	U0	URO	R	493	c	0	3	1	outer_fore	outer_hind	1.28	8.7178			307	10	36	U0	URO	R	473	c	0	5	7	outer_fore	outer_hind	1.3	6				307	11
308	14	0.0119143	U0	URO	R	c	0	1	9	outer_fore	1.18		308	11	77	U0	URO	R	494	c	0	3	1	outer_fore	outer_hind	1.31	8.77496			308	10	38	U0	URO	R	474	c	0	5	7	outer_fore	outer_hind	1.38	6.16441				308	11
309	14	0.0106664	U0	URO	R	c	0	1	9	outer_fore	1.17		309	11	76	U0	URO	R	495	c	0	3	1	outer_fore	outer_hind	1.31	8.7178			309	10	33	U0	URO	R	475	c	0	5	7	outer_fore	outer_hind	1.36	5.74456				309	11
310	14	0.0117251	U0	URO	R	c	0	1	9	outer_fore	1.25		310	11	71	U0	URO	R	496	c	0	3	1	outer_fore	outer_hind	1.29	8.42615			310	10	33	U0	URO	R	476	c	0	5	7	outer_fore	outer_hind	1.32	5.74456				310	11
311	14	0.0123906	U0	URO	R	c	0	1	9	outer_fore	1.24		311	11	77	U0	URO	R	499	c	0	3	1	outer_fore	outer_hind	1.29	8.77496			311	10	35	U0	URO	R	477	c	0	5	7	outer_fore	outer_hind	1.32	5.91608				311	11
312	14	0.0126152	U0	URO	R	c	0	1	9	outer_fore	1.25		312	11	94	U0	URO	R	500	c	0	3	1	outer_fore	outer_hind	1.27	9.69536			312	10	33	U0	URO	R	478	c	0	5	7	outer_fore	outer_hind	1.34	5.74456				312	11
313	15	0.0215089	U0	URO	R	c	0	3	10	outer_fore	1.2		313	11	66	U0	URO	R	501	c	0	3	1	outer_fore	outer_hind	1.25	8.12404			313	10	35	U0	URO	R	481	c	0	5	7	outer_fore	outer_hind	1.36	5.91608				313	11
314	15	0.0280303	U0	URO	R	c	0	3	10	outer_fore	1.14		314	11	82	U0	URO	R	503	c	0	3	1	outer_fore	outer_hind	1.3	9.05539			314	10	33	U0	URO	R	482	c	0	5	7	outer_fore	outer_hind	1.37	5.74456				314	11
315	15	0.0250403	U0	URO	R	c	0	3	10	outer_fore	1.18		315	11	77	U0	URO	R	505	c	0	3	1	outer_fore	outer_hind	1.26	8.77496			315	10	34	U0	URO	R	483	c	0	5	7	outer_fore	outer_hind	1.35	5.83095				315	11
316	15	0.0220291	U0	URO	R	c	0	3	10	outer_fore	1.12		316	11	73	U0	URO	R	506	c	0	3	1	outer_fore	outer_hind	1.24	8.544			316	10	49	U0	URO	R	485	c	0	5	7	outer_fore	outer_hind	1.5	7				316	11
317	17	0.0192401	U0	URO	R	c	0	1	2	outer_fore	1.21		317	11	72	U0	URO	R	507	c	0	3	1	outer_fore	outer_hind	1.31	8.48528			317	10	33	U0	URO	R	487	c	0	5	7	outer_fore	outer_hind	1.38	5.74456				317	11
318	17	0.0199443	U0	URO	R	c	0	1	2	outer_fore	1.2		318	11	82	U0	URO	R	508	c	0	3	1	outer_fore	outer_hind	1.35	9.05539			318	10	33	U0	URO	R	488	c	0	5	7	outer_fore	outer_hind	1.4	5.74456				318	11
319	17	0.0185696	U0	URO	R	c	0	1	2	outer_fore	1.28		319	11	77	U0	URO	R	509	c	0	3	1	outer_fore	outer_hind	1.32	8.77496			319	10	35	U0	URO	R	489	c	0	5	7	outer_fore	outer_hind	1.41	5.91608				319	11
320	17	0.024243	U0	URO	R	c	0	1	2	outer_fore	1.11		320	11	78	U0	URO	R	510	c	0	3	1	outer_fore	outer_hind	1.23	8.83176			320	10	35	U0	URO	R	490	c	0	5	7	outer_fore	outer_hind	1.36	5.91608				320	11
321	17	0.0155719	U0	URO	R	c	0	1	2	outer_fore	1.22		321	11	79	U0	URO	R	511	c	0	3	1	outer_fore	outer_hind	1.2	8.88819			321	10	39	U0	URO	R	491	c	0	5	7	outer_fore	outer_hind	1.35	6.245				321	11
322	17	0.0155084	U0	URO	R	c	0	1	2	outer_fore	1.21		322	11	78	U0	URO	R	512	c	0	3	1	outer_fore	outer_hind	1.22	8.83176			322	11	34	U0	URO	R	493	c	0	3	1	outer_fore	outer_hind	1.28	5.83095				322	11
323	17	0.0267751	U0	URO	R	c	0	1	2	outer_fore	1.26		323	11	94	U0	URO	R	513	c	0	3	1	outer_fore	outer_hind	1.2	9.69536			323	11	31	U0	URO	R	494	c	0	3	1	outer_fore	outer_hind	1.31	5.56776				323	11
324	17	0.0146967	U0	URO	R	c	0	1	2	outer_fore	1.25		324	12	65	U0	URO	R	515	c	0	1	8	outer_fore	outer_hind	1.15	8.06226			324	11	29	U0	URO	R	495	c	0	3	1	outer_fore	outer_hind	1.31	5.38516				324	12
325	17	0.0125327	U0	URO	R	c	0	1	2	outer_fore	1.18		325	12	63	U0	URO	R	516	c	0	1	8	outer_fore	outer_hind	1.2	7.93725			325	11	27	U0	URO	R	496	c	0	3	1	outer_fore	outer_hind	1.29	5.19615				325	12
326	17	0.0156444	U0	URO	R	c	0	1	2	outer_fore	1.26		326	12	75	U0	URO	R	517	c	0	1	8	outer_fore	outer_hind	1.19	8.66025			326	11	28	U0	URO	R	497	c	0	3	1	outer_fore	outer_hind	1.22	5.2915				326	12
327	17	0.0166144	U0	URO	R	c	0	1	2	outer_fore	1.25		327	12	70	U0	URO	R	519	c	0	1	8	outer_fore	outer_hind	1.18	8.3666			327	11	36	U0	URO	R	498	c	0	3	1	outer_fore	outer_hind	1.26	6				327	12
328	17	0.0192321	U0	URO	R	c	0	1	2	outer_fore	1.29		328	12	67	U0	URO	R	521	c	0	1	8	outer_fore	outer_hind	1.19	8.18535			328	11	32	U0	URO	R	499	c	0	3	1	outer_fore	outer_hind	1.29	5.65685				328	12
329	17	0.0180677	U0	URO	R	c	0	1	2	outer_fore	1.25		329	12	67	U0	URO	R	522	c	0	1	8	outer_fore	outer_hind	1.25	8.18535			329	11	31	U0	URO	R	500	c	0	3	1	outer_fore	outer_hind	1.27	5.56776				329	12
330	17	0.0216345	U0	URO	R	c	0	1	2	outer_fore	1.26		330	14	76	U0	URO	R	546	c	0	1	9	outer_fore	outer_hind	1.18	8.7178			330	11	33	U0	URO	R	501	c	0	3	1	outer_fore	outer_hind	1.25	5.74456				330	14
331	1	0.0138225	R0	RLO	L	c	1	1	1	inner_fore	1.33		331	14	75	U0	URO	R	547	c	0	1	9	outer_fore	outer_hind	1.17	8.66025			331	11	34	U0	URO	R	502	c	0	3	1	outer_fore	outer_hind	1.28	5.83095				331	14
332	2	0.015639	R0	RLO	L	c	1	3	2	inner_fore	1.37		332	14	83	U0	URO	R	549	c	0	1	9	outer_fore	outer_hind	1.25	9.11043			332	11	33	U0	URO	R	503	c	0	3	1	outer_fore	outer_hind	1.3	5.74456				332	14
333	2	0.0138499	R0	RLO	L	c	1	3	2	inner_fore	1.4		333	14	79	U0	URO	R	550	c	0	1	9	outer_fore	outer_hind	1.24	8.88819			333	11	29	U0	URO	R	504	c	0	3	1	outer_fore	outer_hind	1.25	5.38516				333	14
334	2	0.0183278	R0	RLO	L	c	1	3	2	inner_fore	1.36		334	14	83	U0	URO	R	551	c	0	1	9	outer_fore	outer_hind	1.25	9.11043			334	11	29	U0	URO	R	505	c	0	3	1	outer_fore	outer_hind	1.26	5.38516				334	14
335	2	0.00861672	R0	RLO	L	c	1	3	2	inner_fore	1.39		335	15	76	U0	URO	R	553	c	0	3	10	outer_fore	outer_hind	1.2	8.7178			335	11	30	U0	URO	R	506	c	0	3	1	outer_fore	outer_hind	1.24	5.47723				335	15
336	2	0.0201617	R0	RLO	L	c	1	3	2	inner_fore	1.39		336	15	70	U0	URO	R	555	c	0	3	10	outer_fore	outer_hind	1.14	8.3666			336	11	31	U0	URO	R	507	c	0	3	1	outer_fore	outer_hind	1.31	5.56776				336	15
337	3	0.0204564	R0	RLO	L	c	1	2	3	inner_fore	1.46		337	15	73	U0	URO	R	560	c	0	3	10	outer_fore	outer_hind	1.18	8.544			337	11	29	U0	URO	R	508	c	0	3	1	outer_fore	outer_hind	1.35	5.38516				337	15
338	3	0.0262093	R0	RLO	L	c	1	2	3	inner_fore	1.56		338	15	72	U0	URO	R	561	c	0	3	10	outer_fore	outer_hind	1.12	8.48528			338	11	29	U0	URO	R	509	c	0	3	1	outer_fore	outer_hind	1.32	5.38516				338	15
339	4	0.00877799	R0	RLO	L	c	1	2	4	inner_fore	1.32		339	17	87	U0	URO	R	588	c	0	1	2	outer_fore	outer_hind	1.21	9.32738			339	11	26	U0	URO	R	510	c	0	3	1	outer_fore	outer_hind	1.23	5.09902				339	17
340	4	0.00887847	R0	RLO	L	c	1	2	4	inner_fore	1.29		340	17	72	U0	URO	R	589	c	0	1	2	outer_fore	outer_hind	1.2	8.48528			340	11	33	U0	URO	R	511	c	0	3	1	outer_fore	outer_hind	1.2	5.74456				340	17
341	8	0.0085461	R0	RLO	L	c	1	5	5	inner_fore	1.32		341	17	72	U0	URO	R	590	c	0	1	2	outer_fore	outer_hind	1.28	8.48528			341	11	32	U0	URO	R	512	c	0	3	1	outer_fore	outer_hind	1.22	5.65685				341	17
342	8	0.00430797	R0	RLO	L	c	1	5	5	inner_fore	1.27		342	17	85	U0	URO	R	591	c	0	1	2	outer_fore	outer_hind	1.11	9.21954			342	11	29	U0	URO	R	513	c	0	3	1	outer_fore	outer_hind	1.2	5.38516				342	17
343	8	0.00653204	R0	RLO	L	c	1	5	5	inner_fore	1.14		343	17	93	U0	URO	R	593	c	0	1	2	outer_fore	outer_hind	1.22	9.64365			343	12	29	U0	URO	R	514	c	0	1	8	outer_fore	outer_hind	1.17	5.38516				343	17
344	8	0.00889213	R0	RLO	L	c	1	5	5	inner_fore	1.24		344	17	80	U0	URO	R	594	c	0	1	2	outer_fore	outer_hind	1.21	8.94427			344	12	29	U0	URO	R	515	c	0	1	8	outer_fore	outer_hind	1.15	5.38516				344	17
345	8	0.005999	R0	RLO	L	c	1	5	5	inner_fore	1.27		345	17	82	U0	URO	R	598	c	0	1	2	outer_fore	outer_hind	1.26	9.05539			345	12	29	U0	URO	R	516	c	0	1	8	outer_fore	outer_hind	1.2	5.38516				345	17
346	8	0.00741933	R0	RLO	L	c	1	5	5	inner_fore	1.31		346	17	77	U0	URO	R	601	c	0	1	2	outer_fore	outer_hind	1.25	8.77496			346	12	31	U0	URO	R	517	c	0	1	8	outer_fore	outer_hind	1.19	5.56776				346	17
347	9	0.0151747	R0	RLO	L	c	1	3	6	inner_fore	1.2		347	17	84	U0	URO	R	603	c	0	1	2	outer_fore	outer_hind	1.18	9.16515			347	12	32	U0	URO	R	519	c	0	1	8	outer_fore	outer_hind	1.18	5.65685				347	17
348	9	0.00900157	R0	RLO	L	c	1	3	6	inner_fore	1.21		348	17	92	U0	URO	R	604	c	0	1	2	outer_fore	outer_hind	1.26	9.59166			348	12	31	U0	URO	R	520	c	0	1	8	outer_fore	outer_hind	1.17	5.56776				348	17
349	9	0.0176304	R0	RLO	L	c	1	3	6	inner_fore	1.23		349	17	81	U0	URO	R	605	c	0	1	2	outer_fore	outer_hind	1.25	9			349	12	31	U0	URO	R	521	c	0	1	8	outer_fore	outer_hind	1.19	5.56776				349	17
350	9	0.0127644	R0	RLO	L	c	1	3	6	inner_fore	1.21		350	17	77	U0	URO	R	606	c	0	1	2	outer_fore	outer_hind	1.29	8.77496			350	12	30	U0	URO	R	522	c	0	1	8	outer_fore	outer_hind	1.25	5.47723				350	17
351	9	0.0117382	R0	RLO	L	c	1	3	6	inner_fore	1.2		351	17	91	U0	URO	R	607	c	0	1	2	outer_fore	outer_hind	1.25	9.53939			351	14	28	U0	URO	R	541	c	0	1	9	outer_fore	outer_hind	1.25	5.2915				351	17
352	9	0.0119696	R0	RLO	L	c	1	3	6	inner_fore	1.18		352	17	90	U0	URO	R	609	c	0	1	2	outer_fore	outer_hind	1.26	9.48683			352	14	25	U0	URO	R	542	c	0	1	9	outer_fore	outer_hind	1.24	5				352	17
353	9	0.0166944	R0	RLO	L	c	1	3	6	inner_fore	1.22		353	1	82	R0	RLO	L	647	c	1	1	1	inner_fore	inner_hind	1.34	9.05539			353	14	27	U0	URO	R	543	c	0	1	9	outer_fore	outer_hind	1.24	5.19615				353	1
354	9	0.00845198	R0	RLO	L	c	1	3	6	inner_fore	1.26		354	1	80	R0	RLO	L	648	c	1	1	1	inner_fore	inner_hind	1.34	8.94427			354	14	25	U0	URO	R	544	c	0	1	9	outer_fore	outer_hind	1.25	5				354	1
355	9	0.0163561	R0	RLO	L	c	1	3	6	inner_fore	1.22		355	1	79	R0	RLO	L	649	c	1	1	1	inner_fore	inner_hind	1.31	8.88819			355	14	30	U0	URO	R	545	c	0	1	9	outer_fore	outer_hind	1.2	5.47723				355	1
356	10	0.0113934	R0	RLO	L	c	1	5	7	inner_fore	1.32		356	1	79	R0	RLO	L	650	c	1	1	1	inner_fore	inner_hind	1.33	8.88819			356	14	25	U0	URO	R	546	c	0	1	9	outer_fore	outer_hind	1.18	5				356	1
357	11	0.00635142	R0	RLO	L	c	1	3	1	inner_fore	1.35		357	1	74	R0	RLO	L	651	c	1	1	1	inner_fore	inner_hind	1.3	8.60233			357	14	28	U0	URO	R	547	c	0	1	9	outer_fore	outer_hind	1.17	5.2915				357	1
358	11	0.00794044	R0	RLO	L	c	1	3	1	inner_fore	1.28		358	2	67	R0	RLO	L	652	c	1	3	2	inner_fore	inner_hind	1.37	8.18535			358	14	25	U0	URO	R	549	c	0	1	9	outer_fore	outer_hind	1.25	5				358	2
359	11	0.00936428	R0	RLO	L	c	1	3	1	inner_fore	1.3		359	2	70	R0	RLO	L	653	c	1	3	2	inner_fore	inner_hind	1.4	8.3666			359	14	29	U0	URO	R	550	c	0	1	9	outer_fore	outer_hind	1.24	5.38516				359	2
360	12	0.0243859	R0	RLO	L	c	1	1	8	inner_fore	1.1		360	2	73	R0	RLO	L	654	c	1	3	2	inner_fore	inner_hind	1.36	8.544			360	14	25	U0	URO	R	551	c	0	1	9	outer_fore	outer_hind	1.25	5				360	2
361	12	0.0240417	R0	RLO	L	c	1	1	8	inner_fore	1.09		361	2	73	R0	RLO	L	655	c	1	3	2	inner_fore	inner_hind	1.39	8.544			361	15	28	U0	URO	R	552	c	0	3	10	outer_fore	outer_hind	1.16	5.2915				361	2
362	12	0.0168986	R0	RLO	L	c	1	1	8	inner_fore	1.13		362	2	70	R0	RLO	L	656	c	1	3	2	inner_fore	inner_hind	1.39	8.3666			362	15	32	U0	URO	R	553	c	0	3	10	outer_fore	outer_hind	1.2	5.65685				362	2
363	12	0.0205742	R0	RLO	L	c	1	1	8	inner_fore	1.11		363	2	62	R0	RLO	L	657	c	1	3	2	inner_fore	inner_hind	1.44	7.87401			363	15	31	U0	URO	R	554	c	0	3	10	outer_fore	outer_hind	1.14	5.56776				363	2
364	17	0.0131484	R0	RLO	L	c	1	1	2	inner_fore	1.14		364	3	80	R0	RLO	L	658	c	1	2	3	inner_fore	inner_hind	1.63	8.94427			364	15	31	U0	URO	R	555	c	0	3	10	outer_fore	outer_hind	1.14	5.56776				364	3
365	17	0.0190188	R0	RLO	L	c	1	1	2	inner_fore	1.12		365	3	82	R0	RLO	L	659	c	1	2	3	inner_fore	inner_hind	1.55	9.05539			365	15	32	U0	URO	R	556	c	0	3	10	outer_fore	outer_hind	1.16	5.65685				365	3
366	17	0.014965	R0	RLO	L	c	1	1	2	inner_fore	1.15		366	3	81	R0	RLO	L	660	c	1	2	3	inner_fore	inner_hind	1.46	9			366	15	32	U0	URO	R	558	c	0	3	10	outer_fore	outer_hind	1.16	5.65685				366	3
367	17	0.0152342	R0	RLO	L	c	1	1	2	inner_fore	1.21		367	3	74	R0	RLO	L	661	c	1	2	3	inner_fore	inner_hind	1.56	8.60233			367	15	35	U0	URO	R	559	c	0	3	10	outer_fore	outer_hind	1.14	5.91608				367	3
368	17	0.0120793	R0	RLO	L	c	1	1	2	inner_fore	1.19		368	3	86	R0	RLO	L	662	c	1	2	3	inner_fore	inner_hind	1.58	9.27362			368	15	32	U0	URO	R	560	c	0	3	10	outer_fore	outer_hind	1.18	5.65685				368	3
369	17	0.0187611	R0	RLO	L	c	1	1	2	inner_fore	1.14		369	4	75	R0	RLO	L	664	c	1	2	4	inner_fore	inner_hind	1.32	8.66025			369	15	30	U0	URO	R	561	c	0	3	10	outer_fore	outer_hind	1.12	5.47723				369	4
370	17	0.0147001	R0	RLO	L	c	1	1	2	inner_fore	1.17		370	4	90	R0	RLO	L	667	c	1	2	4	inner_fore	inner_hind	1.29	9.48683			370	15	30	U0	URO	R	562	c	0	3	10	outer_fore	outer_hind	1.2	5.47723				370	4
371	17	0.0154813	R0	RLO	L	c	1	1	2	inner_fore	1.21		371	7	87	R0	RLO	L	681	c	1	1	6	inner_fore	inner_hind	1.25	9.32738			371	15	30	U0	URO	R	563	c	0	3	10	outer_fore	outer_hind	1.22	5.47723				371	7
372	17	0.0123335	R0	RLO	L	c	1	1	2	inner_fore	1.22		372	8	71	R0	RLO	L	684	c	1	5	5	inner_fore	inner_hind	1.36	8.42615			372	17	32	U0	URO	R	587	c	0	1	2	outer_fore	outer_hind	1.23	5.65685				372	8
373	17	0.00664612	R0	RLO	L	c	1	1	2	inner_fore	1.18		373	8	66	R0	RLO	L	685	c	1	5	5	inner_fore	inner_hind	1.23	8.12404			373	17	30	U0	URO	R	588	c	0	1	2	outer_fore	outer_hind	1.21	5.47723				373	8
374	17	0.00961097	R0	RLO	L	c	1	1	2	inner_fore	1.14		374	8	73	R0	RLO	L	686	c	1	5	5	inner_fore	inner_hind	1.35	8.544			374	17	26	U0	URO	R	589	c	0	1	2	outer_fore	outer_hind	1.2	5.09902				374	8
375	1	0.0126122	R0	RRO	R	c	1	1	1	outer_fore	1.36		375	8	84	R0	RLO	L	689	c	1	5	5	inner_fore	inner_hind	1.32	9.16515			375	17	27	U0	URO	R	590	c	0	1	2	outer_fore	outer_hind	1.28	5.19615				375	8
376	1	0.0141387	R0	RRO	R	c	1	1	1	outer_fore	1.41		376	8	79	R0	RLO	L	690	c	1	5	5	inner_fore	inner_hind	1.28	8.88819			376	17	21	U0	URO	R	591	c	0	1	2	outer_fore	outer_hind	1.11	4.58258				376	8
377	2	0.0163903	R0	RRO	R	c	1	3	2	outer_fore	1.36		377	8	67	R0	RLO	L	691	c	1	5	5	inner_fore	inner_hind	1.27	8.18535			377	17	35	U0	URO	R	592	c	0	1	2	outer_fore	outer_hind	1.25	5.91608				377	8
378	2	0.0205702	R0	RRO	R	c	1	3	2	outer_fore	1.45		378	8	82	R0	RLO	L	695	c	1	5	5	inner_fore	inner_hind	1.34	9.05539			378	17	30	U0	URO	R	593	c	0	1	2	outer_fore	outer_hind	1.22	5.47723				378	8
379	2	0.0162634	R0	RRO	R	c	1	3	2	outer_fore	1.39		379	8	76	R0	RLO	L	697	c	1	5	5	inner_fore	inner_hind	1.14	8.7178			379	17	32	U0	URO	R	594	c	0	1	2	outer_fore	outer_hind	1.21	5.65685				379	8
380	2	0.00972594	R0	RRO	R	c	1	3	2	outer_fore	1.42		380	8	86	R0	RLO	L	702	c	1	5	5	inner_fore	inner_hind	1.21	9.27362			380	17	33	U0	URO	R	595	c	0	1	2	outer_fore	outer_hind	1.25	5.74456				380	8
381	2	0.00925737	R0	RRO	R	c	1	3	2	outer_fore	1.42		381	8	85	R0	RLO	L	704	c	1	5	5	inner_fore	inner_hind	1.26	9.21954			381	17	31	U0	URO	R	596	c	0	1	2	outer_fore	outer_hind	1.2	5.56776				381	8
382	2	0.0114081	R0	RRO	R	c	1	3	2	outer_fore	1.42		382	8	85	R0	RLO	L	705	c	1	5	5	inner_fore	inner_hind	1.32	9.21954			382	17	22	U0	URO	R	598	c	0	1	2	outer_fore	outer_hind	1.26	4.69042				382	8
383	2	0.00971596	R0	RRO	R	c	1	3	2	outer_fore	1.39		383	8	68	R0	RLO	L	708	c	1	5	5	inner_fore	inner_hind	1.31	8.24621			383	17	25	U0	URO	R	599	c	0	1	2	outer_fore	outer_hind	1.28	5				383	8
384	2	0.0143522	R0	RRO	R	c	1	3	2	outer_fore	1.44		384	8	68	R0	RLO	L	709	c	1	5	5	inner_fore	inner_hind	1.25	8.24621			384	17	26	U0	URO	R	600	c	0	1	2	outer_fore	outer_hind	1.22	5.09902				384	8
385	2	0.0203007	R0	RRO	R	c	1	3	2	outer_fore	1.44		385	8	90	R0	RLO	L	710	c	1	5	5	inner_fore	inner_hind	1.31	9.48683			385	17	30	U0	URO	R	601	c	0	1	2	outer_fore	outer_hind	1.25	5.47723				385	8
386	3	0.0144953	R0	RRO	R	c	1	2	3	outer_fore	1.36		386	8	83	R0	RLO	L	715	c	1	5	5	inner_fore	inner_hind	1.24	9.11043			386	17	30	U0	URO	R	602	c	0	1	2	outer_fore	outer_hind	1.25	5.47723				386	8
387	3	0.0157823	R0	RRO	R	c	1	2	3	outer_fore	1.43		387	8	70	R0	RLO	L	716	c	1	5	5	inner_fore	inner_hind	1.27	8.3666			387	17	20	U0	URO	R	603	c	0	1	2	outer_fore	outer_hind	1.18	4.47214				387	8
388	3	0.0140982	R0	RRO	R	c	1	2	3	outer_fore	1.47		388	8	79	R0	RLO	L	717	c	1	5	5	inner_fore	inner_hind	1.31	8.88819			388	17	27	U0	URO	R	604	c	0	1	2	outer_fore	outer_hind	1.26	5.19615				388	8
389	5	0.00437319	R0	RRO	R	c	1	4	5	outer_fore	1.28		389	9	83	R0	RLO	L	719	c	1	3	6	inner_fore	inner_hind	1.19	9.11043			389	17	28	U0	URO	R	605	c	0	1	2	outer_fore	outer_hind	1.25	5.2915				389	9
390	5	0.00751473	R0	RRO	R	c	1	4	5	outer_fore	1.31		390	9	83	R0	RLO	L	721	c	1	3	6	inner_fore	inner_hind	1.2	9.11043			390	17	32	U0	URO	R	606	c	0	1	2	outer_fore	outer_hind	1.29	5.65685				390	9
391	7	0.0172359	R0	RRO	R	c	1	1	6	outer_fore	1.25		391	9	84	R0	RLO	L	722	c	1	3	6	inner_fore	inner_hind	1.21	9.16515			391	17	30	U0	URO	R	607	c	0	1	2	outer_fore	outer_hind	1.25	5.47723				391	9
392	7	0.0112357	R0	RRO	R	c	1	1	6	outer_fore	1.22		392	9	86	R0	RLO	L	723	c	1	3	6	inner_fore	inner_hind	1.21	9.27362			392	17	31	U0	URO	R	608	c	0	1	2	outer_fore	outer_hind	1.34	5.56776				392	9
393	9	0.0117733	R0	RRO	R	c	1	3	6	outer_fore	1.12		393	9	86	R0	RLO	L	724	c	1	3	6	inner_fore	inner_hind	1.23	9.27362			393	17	31	U0	URO	R	609	c	0	1	2	outer_fore	outer_hind	1.26	5.56776				393	9
394	9	0.0118139	R0	RRO	R	c	1	3	6	outer_fore	1.18		394	9	84	R0	RLO	L	725	c	1	3	6	inner_fore	inner_hind	1.21	9.16515			394	1	30	R0	RLO	L	650	c	1	1	1	inner_fore	inner_hind	1.33	5.47723				394	9
395	9	0.0101495	R0	RRO	R	c	1	3	6	outer_fore	1.12		395	9	84	R0	RLO	L	726	c	1	3	6	inner_fore	inner_hind	1.2	9.16515			395	2	22	R0	RLO	L	652	c	1	3	2	inner_fore	inner_hind	1.37	4.69042				395	9
396	9	0.0112412	R0	RRO	R	c	1	3	6	outer_fore	1.15		396	9	86	R0	RLO	L	727	c	1	3	6	inner_fore	inner_hind	1.25	9.27362			396	2	46	R0	RLO	L	653	c	1	3	2	inner_fore	inner_hind	1.4	6.78233				396	9
397	9	0.0123543	R0	RRO	R	c	1	3	6	outer_fore	1.16		397	9	84	R0	RLO	L	728	c	1	3	6	inner_fore	inner_hind	1.18	9.16515			397	2	23	R0	RLO	L	654	c	1	3	2	inner_fore	inner_hind	1.36	4.79583				397	9
398	9	0.0164127	R0	RRO	R	c	1	3	6	outer_fore	1.19		398	9	82	R0	RLO	L	730	c	1	3	6	inner_fore	inner_hind	1.22	9.05539			398	2	21	R0	RLO	L	655	c	1	3	2	inner_fore	inner_hind	1.39	4.58258				398	9
399	10	0.0180528	R0	RRO	R	c	1	5	7	outer_fore	1.31		399	9	85	R0	RLO	L	732	c	1	3	6	inner_fore	inner_hind	1.24	9.21954			399	2	15	R0	RLO	L	656	c	1	3	2	inner_fore	inner_hind	1.39	3.87298				399	9
400	10	0.0130756	R0	RRO	R	c	1	5	7	outer_fore	1.28		400	9	82	R0	RLO	L	734	c	1	3	6	inner_fore	inner_hind	1.26	9.05539			400	3	33	R0	RLO	L	660	c	1	2	3	inner_fore	inner_hind	1.46	5.74456				400	9
401	10	0.010963	R0	RRO	R	c	1	5	7	outer_fore	1.29		401	9	84	R0	RLO	L	737	c	1	3	6	inner_fore	inner_hind	1.22	9.16515			401	3	40	R0	RLO	L	661	c	1	2	3	inner_fore	inner_hind	1.56	6.32456				401	9
402	11	0.00760312	R0	RRO	R	c	1	3	1	outer_fore	1.38		402	10	74	R0	RLO	L	741	c	1	5	7	inner_fore	inner_hind	1.34	8.60233			402	4	26	R0	RLO	L	664	c	1	2	4	inner_fore	inner_hind	1.32	5.09902				402	10
403	11	0.00966829	R0	RRO	R	c	1	3	1	outer_fore	1.33		403	10	70	R0	RLO	L	742	c	1	5	7	inner_fore	inner_hind	1.32	8.3666			403	4	28	R0	RLO	L	667	c	1	2	4	inner_fore	inner_hind	1.29	5.2915				403	10
404	12	0.0241021	R0	RRO	R	c	1	1	8	outer_fore	1.11		404	10	73	R0	RLO	L	743	c	1	5	7	inner_fore	inner_hind	1.19	8.544			404	7	12	R0	RLO	L	682	c	1	1	6	inner_fore	inner_hind	1.25	3.4641				404	10
405	12	0.0199205	R0	RRO	R	c	1	1	8	outer_fore	1.11		405	10	69	R0	RLO	L	745	c	1	5	7	inner_fore	inner_hind	1.32	8.30662			405	7	19	R0	RLO	L	683	c	1	1	6	inner_fore	inner_hind	1.28	4.3589				405	10
406	12	0.0151029	R0	RRO	R	c	1	1	8	outer_fore	1.11		406	10	70	R0	RLO	L	746	c	1	5	7	inner_fore	inner_hind	1.27	8.3666			406	8	13	R0	RLO	L	689	c	1	5	5	inner_fore	inner_hind	1.32	3.60555				406	10
407	12	0.0201816	R0	RRO	R	c	1	1	8	outer_fore	1.14		407	11	82	R0	RLO	L	748	c	1	3	1	inner_fore	inner_hind	1.34	9.05539			407	8	45	R0	RLO	L	691	c	1	5	5	inner_fore	inner_hind	1.27	6.7082				407	11
408	12	0.0199099	R0	RRO	R	c	1	1	8	outer_fore	1.1		408	11	83	R0	RLO	L	750	c	1	3	1	inner_fore	inner_hind	1.44	9.11043			408	8	49	R0	RLO	L	692	c	1	5	5	inner_fore	inner_hind	1.29	7				408	11
409	12	0.0220446	R0	RRO	R	c	1	1	8	outer_fore	1.13		409	11	79	R0	RLO	L	751	c	1	3	1	inner_fore	inner_hind	1.35	8.88819			409	8	20	R0	RLO	L	697	c	1	5	5	inner_fore	inner_hind	1.14	4.47214				409	11
410	12	0.0180698	R0	RRO	R	c	1	1	8	outer_fore	1.14		410	11	81	R0	RLO	L	752	c	1	3	1	inner_fore	inner_hind	1.28	9			410	8	25	R0	RLO	L	711	c	1	5	5	inner_fore	inner_hind	1.2	5				410	11
411	14	0.0152328	R0	RRO	R	c	1	1	9	outer_fore	1.04		411	11	88	R0	RLO	L	753	c	1	3	1	inner_fore	inner_hind	1.22	9.38083			411	8	26	R0	RLO	L	715	c	1	5	5	inner_fore	inner_hind	1.24	5.09902				411	11
412	14	0.0133284	R0	RRO	R	c	1	1	9	outer_fore	1.05		412	11	75	R0	RLO	L	755	c	1	3	1	inner_fore	inner_hind	1.3	8.66025			412	8	28	R0	RLO	L	716	c	1	5	5	inner_fore	inner_hind	1.27	5.2915				412	11
413	14	0.0151351	R0	RRO	R	c	1	1	9	outer_fore	1.02		413	11	79	R0	RLO	L	756	c	1	3	1	inner_fore	inner_hind	1.34	8.88819			413	8	18	R0	RLO	L	717	c	1	5	5	inner_fore	inner_hind	1.31	4.24264				413	11
414	14	0.0144149	R0	RRO	R	c	1	1	9	outer_fore	1.03		414	11	73	R0	RLO	L	757	c	1	3	1	inner_fore	inner_hind	1.34	8.544			414	9	21	R0	RLO	L	720	c	1	3	6	inner_fore	inner_hind	1.27	4.58258				414	11
415	15	0.00479728	R0	RRO	R	c	1	3	10	outer_fore	1.26		415	11	78	R0	RLO	L	758	c	1	3	1	inner_fore	inner_hind	1.33	8.83176			415	9	18	R0	RLO	L	721	c	1	3	6	inner_fore	inner_hind	1.2	4.24264				415	11
416	17	0.00980109	R0	RRO	R	c	1	1	2	outer_fore	1.16		416	11	71	R0	RLO	L	759	c	1	3	1	inner_fore	inner_hind	1.21	8.42615			416	9	20	R0	RLO	L	722	c	1	3	6	inner_fore	inner_hind	1.21	4.47214				416	11
417	17	0.015387	R0	RRO	R	c	1	1	2	outer_fore	1.08		417	11	74	R0	RLO	L	761	c	1	3	1	inner_fore	inner_hind	1.27	8.60233			417	9	22	R0	RLO	L	724	c	1	3	6	inner_fore	inner_hind	1.23	4.69042				417	11
418	17	0.014975	R0	RRO	R	c	1	1	2	outer_fore	1.17		418	11	76	R0	RLO	L	762	c	1	3	1	inner_fore	inner_hind	1.28	8.7178			418	9	23	R0	RLO	L	725	c	1	3	6	inner_fore	inner_hind	1.21	4.79583				418	11
419	17	0.0142066	R0	RRO	R	c	1	1	2	outer_fore	1.21		419	11	75	R0	RLO	L	763	c	1	3	1	inner_fore	inner_hind	1.37	8.66025			419	9	22	R0	RLO	L	726	c	1	3	6	inner_fore	inner_hind	1.2	4.69042				419	11
420	1	0.0235303	gang	gang	S	S	0	1	1	stra_fore	1.43		420	11	80	R0	RLO	L	764	c	1	3	1	inner_fore	inner_hind	1.4	8.94427			420	9	20	R0	RLO	L	728	c	1	3	6	inner_fore	inner_hind	1.18	4.47214				420	11
421	1	0.0344794	gang	gang	S	S	0	1	1	stra_fore	1.1		421	11	79	R0	RLO	L	765	c	1	3	1	inner_fore	inner_hind	1.39	8.88819			421	9	19	R0	RLO	L	730	c	1	3	6	inner_fore	inner_hind	1.22	4.3589				421	11
422	1	0.0281519	gang	gang	S	S	0	1	1	stra_fore	1.15		422	11	81	R0	RLO	L	766	c	1	3	1	inner_fore	inner_hind	1.36	9			422	9	22	R0	RLO	L	731	c	1	3	6	inner_fore	inner_hind	1.21	4.69042				422	11
423	1	0.0271301	gang	gang	S	S	0	1	1	stra_fore	1.17		423	11	88	R0	RLO	L	767	c	1	3	1	inner_fore	inner_hind	1.36	9.38083			423	9	17	R0	RLO	L	734	c	1	3	6	inner_fore	inner_hind	1.26	4.12311				423	11
424	1	0.038163	gang	gang	S	S	0	1	1	stra_fore	1.15		424	11	78	R0	RLO	L	768	c	1	3	1	inner_fore	inner_hind	1.35	8.83176			424	9	49	R0	RLO	L	735	c	1	3	6	inner_fore	inner_hind	1.27	7				424	11
425	1	0.023124	gang	gang	S	S	0	1	1	stra_fore	1.15		425	12	74	R0	RLO	L	772	c	1	1	8	inner_fore	inner_hind	1.1	8.60233			425	9	21	R0	RLO	L	737	c	1	3	6	inner_fore	inner_hind	1.22	4.58258				425	12
426	1	0.0314935	gang	gang	S	S	0	1	1	stra_fore	1.14		426	12	69	R0	RLO	L	773	c	1	1	8	inner_fore	inner_hind	1.09	8.30662			426	10	49	R0	RLO	L	744	c	1	5	7	inner_fore	inner_hind	1.29	7				426	12
427	1	0.027529	gang	gang	S	S	0	1	1	stra_fore	1.2		427	12	72	R0	RLO	L	774	c	1	1	8	inner_fore	inner_hind	1.13	8.48528			427	10	23	R0	RLO	L	745	c	1	5	7	inner_fore	inner_hind	1.32	4.79583				427	12
428	1	0.0248251	gang	gang	S	S	0	1	1	stra_fore	1.18		428	12	68	R0	RLO	L	775	c	1	1	8	inner_fore	inner_hind	1.11	8.24621			428	11	11	R0	RLO	L	751	c	1	3	1	inner_fore	inner_hind	1.35	3.31662				428	12
429	2	0.0251236	gang	gang	S	S	0	3	2	stra_fore	1.29		429	17	92	R0	RLO	L	829	c	1	1	2	inner_fore	inner_hind	1.14	9.59166			429	11	26	R0	RLO	L	752	c	1	3	1	inner_fore	inner_hind	1.28	5.09902				429	17
430	2	0.0249969	gang	gang	S	S	0	3	2	stra_fore	1.21		430	17	62	R0	RLO	L	833	c	1	1	2	inner_fore	inner_hind	1.12	7.87401			430	11	22	R0	RLO	L	754	c	1	3	1	inner_fore	inner_hind	1.25	4.69042				430	17
431	2	0.0159715	gang	gang	S	S	0	3	2	stra_fore	1.18		431	17	65	R0	RLO	L	837	c	1	1	2	inner_fore	inner_hind	1.15	8.06226			431	11	17	R0	RLO	L	755	c	1	3	1	inner_fore	inner_hind	1.3	4.12311				431	17
432	2	0.0193884	gang	gang	S	S	0	3	2	stra_fore	1.23		432	17	61	R0	RLO	L	839	c	1	1	2	inner_fore	inner_hind	1.21	7.81025			432	12	29	R0	RLO	L	771	c	1	1	8	inner_fore	inner_hind	1.09	5.38516				432	17
433	2	0.0253357	gang	gang	S	S	0	3	2	stra_fore	1.21		433	17	63	R0	RLO	L	840	c	1	1	2	inner_fore	inner_hind	1.17	7.93725			433	12	21	R0	RLO	L	772	c	1	1	8	inner_fore	inner_hind	1.1	4.58258				433	17
434	2	0.0242868	gang	gang	S	S	0	3	2	stra_fore	1.25		434	17	62	R0	RLO	L	841	c	1	1	2	inner_fore	inner_hind	1.19	7.87401			434	12	29	R0	RLO	L	773	c	1	1	8	inner_fore	inner_hind	1.09	5.38516				434	17
435	2	0.0265196	gang	gang	S	S	0	3	2	stra_fore	1.23		435	17	92	R0	RLO	L	842	c	1	1	2	inner_fore	inner_hind	1.14	9.59166			435	12	28	R0	RLO	L	774	c	1	1	8	inner_fore	inner_hind	1.13	5.2915				435	17
436	2	0.0218672	gang	gang	S	S	0	3	2	stra_fore	1.29		436	17	63	R0	RLO	L	845	c	1	1	2	inner_fore	inner_hind	1.17	7.93725			436	12	16	R0	RLO	L	775	c	1	1	8	inner_fore	inner_hind	1.11	4				436	17
437	3	0.0211252	gang	gang	S	S	0	2	3	stra_fore	1.24		437	17	65	R0	RLO	L	847	c	1	1	2	inner_fore	inner_hind	1.21	8.06226			437	15	23	R0	RLO	L	797	c	1	3	10	inner_fore	inner_hind	1.2	4.79583				437	17
438	3	0.0161498	gang	gang	S	S	0	2	3	stra_fore	1.25		438	17	63	R0	RLO	L	848	c	1	1	2	inner_fore	inner_hind	1.22	7.93725			438	15	31	R0	RLO	L	799	c	1	3	10	inner_fore	inner_hind	1.19	5.56776				438	17
439	3	0.0235458	gang	gang	S	S	0	2	3	stra_fore	1.33		439	17	94	R0	RLO	L	849	c	1	1	2	inner_fore	inner_hind	1.18	9.69536			439	17	18	R0	RLO	L	829	c	1	1	2	inner_fore	inner_hind	1.14	4.24264				439	17
440	3	0.0173652	gang	gang	S	S	0	2	3	stra_fore	1.35		440	17	62	R0	RLO	L	850	c	1	1	2	inner_fore	inner_hind	1.14	7.87401			440	17	18	R0	RLO	L	830	c	1	1	2	inner_fore	inner_hind	1.02	4.24264				440	17
441	3	0.0235504	gang	gang	S	S	0	2	3	stra_fore	1.3		441	1	79	R0	RRO	R	869	c	1	1	1	outer_fore	outer_hind	1.36	8.88819			441	17	32	R0	RLO	L	831	c	1	1	2	inner_fore	inner_hind	1.33	5.65685				441	1
442	3	0.0201137	gang	gang	S	S	0	2	3	stra_fore	1.29		442	1	72	R0	RRO	R	871	c	1	1	1	outer_fore	outer_hind	1.38	8.48528			442	17	17	R0	RLO	L	833	c	1	1	2	inner_fore	inner_hind	1.12	4.12311				442	1
443	3	0.017305	gang	gang	S	S	0	2	3	stra_fore	1.26		443	1	82	R0	RRO	R	872	c	1	1	1	outer_fore	outer_hind	1.41	9.05539			443	17	11	R0	RLO	L	834	c	1	1	2	inner_fore	inner_hind	1.18	3.31662				443	1
444	5	0.0197663	gang	gang	S	S	0	4	5	stra_fore	1.31		444	1	78	R0	RRO	R	873	c	1	1	1	outer_fore	outer_hind	1.23	8.83176			444	17	17	R0	RLO	L	837	c	1	1	2	inner_fore	inner_hind	1.15	4.12311				444	1
445	5	0.018628	gang	gang	S	S	0	4	5	stra_fore	1.31		445	2	78	R0	RRO	R	874	c	1	3	2	outer_fore	outer_hind	1.36	8.83176			445	17	18	R0	RLO	L	839	c	1	1	2	inner_fore	inner_hind	1.21	4.24264				445	2
446	5	0.0111005	gang	gang	S	S	0	4	5	stra_fore	1.34		446	2	77	R0	RRO	R	878	c	1	3	2	outer_fore	outer_hind	1.45	8.77496			446	17	18	R0	RLO	L	841	c	1	1	2	inner_fore	inner_hind	1.19	4.24264				446	2
447	7	0.0235303	gang	gang	S	S	0	1	6	stra_fore	1.43		447	2	70	R0	RRO	R	880	c	1	3	2	outer_fore	outer_hind	1.39	8.3666			447	17	14	R0	RLO	L	842	c	1	1	2	inner_fore	inner_hind	1.14	3.74166				447	2
448	7	0.0344794	gang	gang	S	S	0	1	6	stra_fore	1.1		448	2	72	R0	RRO	R	881	c	1	3	2	outer_fore	outer_hind	1.42	8.48528			448	17	16	R0	RLO	L	843	c	1	1	2	inner_fore	inner_hind	1.14	4				448	2
449	7	0.0281519	gang	gang	S	S	0	1	6	stra_fore	1.15		449	2	73	R0	RRO	R	882	c	1	3	2	outer_fore	outer_hind	1.42	8.544			449	17	16	R0	RLO	L	844	c	1	1	2	inner_fore	inner_hind	1.17	4				449	2
450	7	0.0271301	gang	gang	S	S	0	1	6	stra_fore	1.17		450	2	73	R0	RRO	R	884	c	1	3	2	outer_fore	outer_hind	1.42	8.544			450	17	17	R0	RLO	L	845	c	1	1	2	inner_fore	inner_hind	1.17	4.12311				450	2
451	7	0.038163	gang	gang	S	S	0	1	6	stra_fore	1.15		451	2	79	R0	RRO	R	885	c	1	3	2	outer_fore	outer_hind	1.39	8.88819			451	17	20	R0	RLO	L	846	c	1	1	2	inner_fore	inner_hind	1.15	4.47214				451	2
452	7	0.023124	gang	gang	S	S	0	1	6	stra_fore	1.15		452	2	76	R0	RRO	R	886	c	1	3	2	outer_fore	outer_hind	1.47	8.7178			452	17	19	R0	RLO	L	847	c	1	1	2	inner_fore	inner_hind	1.21	4.3589				452	2
453	7	0.0314935	gang	gang	S	S	0	1	6	stra_fore	1.14		453	2	73	R0	RRO	R	887	c	1	3	2	outer_fore	outer_hind	1.44	8.544			453	17	18	R0	RLO	L	848	c	1	1	2	inner_fore	inner_hind	1.22	4.24264				453	2
454	7	0.027529	gang	gang	S	S	0	1	6	stra_fore	1.2		454	2	75	R0	RRO	R	888	c	1	3	2	outer_fore	outer_hind	1.44	8.66025			454	17	15	R0	RLO	L	849	c	1	1	2	inner_fore	inner_hind	1.18	3.87298				454	2
455	7	0.0248251	gang	gang	S	S	0	1	6	stra_fore	1.18		455	3	68	R0	RRO	R	891	c	1	2	3	outer_fore	outer_hind	1.36	8.24621			455	17	16	R0	RLO	L	850	c	1	1	2	inner_fore	inner_hind	1.14	4				455	3
456	8	0.0116985	gang	gang	S	S	0	5	5	stra_fore	1.15		456	3	68	R0	RRO	R	892	c	1	2	3	outer_fore	outer_hind	1.43	8.24621			456	1	35	R0	RRO	R	869	c	1	1	1	outer_fore	outer_hind	1.36	5.91608				456	3
457	8	0.0139092	gang	gang	S	S	0	5	5	stra_fore	1.14		457	3	77	R0	RRO	R	894	c	1	2	3	outer_fore	outer_hind	1.47	8.77496			457	1	31	R0	RRO	R	872	c	1	1	1	outer_fore	outer_hind	1.41	5.56776				457	3
458	8	0.011973	gang	gang	S	S	0	5	5	stra_fore	1.19		458	5	69	R0	RRO	R	914	c	1	4	5	outer_fore	outer_hind	1.28	8.30662			458	2	35	R0	RRO	R	874	c	1	3	2	outer_fore	outer_hind	1.36	5.91608				458	5
459	8	0.0107917	gang	gang	S	S	0	5	5	stra_fore	1.22		459	5	71	R0	RRO	R	915	c	1	4	5	outer_fore	outer_hind	1.31	8.42615			459	2	19	R0	RRO	R	878	c	1	3	2	outer_fore	outer_hind	1.45	4.3589				459	5
460	8	0.00751381	gang	gang	S	S	0	5	5	stra_fore	1.2		460	7	86	R0	RRO	R	928	c	1	1	6	outer_fore	outer_hind	1.25	9.27362			460	2	23	R0	RRO	R	880	c	1	3	2	outer_fore	outer_hind	1.39	4.79583				460	7
461	8	0.00892194	gang	gang	S	S	0	5	5	stra_fore	1.21		461	7	78	R0	RRO	R	929	c	1	1	6	outer_fore	outer_hind	1.22	8.83176			461	2	29	R0	RRO	R	881	c	1	3	2	outer_fore	outer_hind	1.42	5.38516				461	7
462	8	0.00707396	gang	gang	S	S	0	5	5	stra_fore	1.25		462	7	88	R0	RRO	R	935	c	1	1	6	outer_fore	outer_hind	1.31	9.38083			462	2	24	R0	RRO	R	882	c	1	3	2	outer_fore	outer_hind	1.42	4.89898				462	7
463	8	0.00750408	gang	gang	S	S	0	5	5	stra_fore	1.25		463	7	85	R0	RRO	R	936	c	1	1	6	outer_fore	outer_hind	1.31	9.21954			463	2	29	R0	RRO	R	884	c	1	3	2	outer_fore	outer_hind	1.42	5.38516				463	7
464	8	0.00633172	gang	gang	S	S	0	5	5	stra_fore	1.25		464	8	71	R0	RRO	R	937	c	1	5	5	outer_fore	outer_hind	1.37	8.42615			464	2	30	R0	RRO	R	885	c	1	3	2	outer_fore	outer_hind	1.39	5.47723				464	8
465	8	0.009928	gang	gang	S	S	0	5	5	stra_fore	1.25		465	9	83	R0	RRO	R	954	c	1	3	6	outer_fore	outer_hind	1.12	9.11043			465	2	28	R0	RRO	R	887	c	1	3	2	outer_fore	outer_hind	1.44	5.2915				465	9
466	9	0.0146905	gang	gang	S	S	0	3	6	stra_fore	1.08		466	9	83	R0	RRO	R	955	c	1	3	6	outer_fore	outer_hind	1.18	9.11043			466	2	27	R0	RRO	R	888	c	1	3	2	outer_fore	outer_hind	1.44	5.19615				466	9
467	9	0.0141878	gang	gang	S	S	0	3	6	stra_fore	1.1		467	9	78	R0	RRO	R	963	c	1	3	6	outer_fore	outer_hind	1.12	8.83176			467	3	25	R0	RRO	R	891	c	1	2	3	outer_fore	outer_hind	1.36	5				467	9
468	10	0.012285	gang	gang	S	S	0	5	7	stra_fore	1.18		468	9	80	R0	RRO	R	964	c	1	3	6	outer_fore	outer_hind	1.15	8.94427			468	3	31	R0	RRO	R	892	c	1	2	3	outer_fore	outer_hind	1.43	5.56776				468	9
469	10	0.0215035	gang	gang	S	S	0	5	7	stra_fore	1.2		469	9	63	R0	RRO	R	968	c	1	3	6	outer_fore	outer_hind	1.16	7.93725			469	3	31	R0	RRO	R	893	c	1	2	3	outer_fore	outer_hind	1.44	5.56776				469	9
470	10	0.0191509	gang	gang	S	S	0	5	7	stra_fore	1.19		470	9	86	R0	RRO	R	969	c	1	3	6	outer_fore	outer_hind	1.16	9.27362			470	3	31	R0	RRO	R	894	c	1	2	3	outer_fore	outer_hind	1.47	5.56776				470	9
471	10	0.014987	gang	gang	S	S	0	5	7	stra_fore	1.17		471	9	83	R0	RRO	R	973	c	1	3	6	outer_fore	outer_hind	1.19	9.11043			471	3	29	R0	RRO	R	895	c	1	2	3	outer_fore	outer_hind	1.38	5.38516				471	9
472	10	0.0192128	gang	gang	S	S	0	5	7	stra_fore	1.22		472	10	76	R0	RRO	R	977	c	1	5	7	outer_fore	outer_hind	1.31	8.7178			472	3	29	R0	RRO	R	896	c	1	2	3	outer_fore	outer_hind	1.32	5.38516				472	10
473	10	0.0108854	gang	gang	S	S	0	5	7	stra_fore	1.22		473	10	70	R0	RRO	R	978	c	1	5	7	outer_fore	outer_hind	1.32	8.3666			473	3	30	R0	RRO	R	897	c	1	2	3	outer_fore	outer_hind	1.36	5.47723				473	10
474	10	0.0275337	gang	gang	S	S	0	5	7	stra_fore	1.26		474	10	74	R0	RRO	R	980	c	1	5	7	outer_fore	outer_hind	1.28	8.60233			474	3	28	R0	RRO	R	898	c	1	2	3	outer_fore	outer_hind	1.37	5.2915				474	10
475	10	0.0185521	gang	gang	S	S	0	5	7	stra_fore	1.2		475	10	77	R0	RRO	R	981	c	1	5	7	outer_fore	outer_hind	1.29	8.77496			475	3	31	R0	RRO	R	899	c	1	2	3	outer_fore	outer_hind	1.41	5.56776				475	10
476	10	0.0220045	gang	gang	S	S	0	5	7	stra_fore	1.17		476	10	69	R0	RRO	R	984	c	1	5	7	outer_fore	outer_hind	1.29	8.30662			476	3	30	R0	RRO	R	900	c	1	2	3	outer_fore	outer_hind	1.42	5.47723				476	10
477	11	0.0182868	gang	gang	S	S	0	3	1	stra_fore	1.13		477	11	72	R0	RRO	R	989	c	1	3	1	outer_fore	outer_hind	1.38	8.48528			477	3	27	R0	RRO	R	901	c	1	2	3	outer_fore	outer_hind	1.35	5.19615				477	11
478	11	0.0146153	gang	gang	S	S	0	3	1	stra_fore	1.19		478	11	80	R0	RRO	R	990	c	1	3	1	outer_fore	outer_hind	1.38	8.94427			478	3	32	R0	RRO	R	902	c	1	2	3	outer_fore	outer_hind	1.38	5.65685				478	11
479	11	0.0187777	gang	gang	S	S	0	3	1	stra_fore	1.16		479	11	82	R0	RRO	R	991	c	1	3	1	outer_fore	outer_hind	1.36	9.05539			479	5	27	R0	RRO	R	909	c	1	4	5	outer_fore	outer_hind	1.3	5.19615				479	11
480	11	0.0129653	gang	gang	S	S	0	3	1	stra_fore	1.16		480	11	73	R0	RRO	R	992	c	1	3	1	outer_fore	outer_hind	1.29	8.544			480	5	26	R0	RRO	R	914	c	1	4	5	outer_fore	outer_hind	1.28	5.09902				480	11
481	11	0.0135407	gang	gang	S	S	0	3	1	stra_fore	1.18		481	11	84	R0	RRO	R	993	c	1	3	1	outer_fore	outer_hind	1.33	9.16515			481	5	30	R0	RRO	R	915	c	1	4	5	outer_fore	outer_hind	1.31	5.47723				481	11
482	11	0.0150787	gang	gang	S	S	0	3	1	stra_fore	1.17		482	12	67	R0	RRO	R	995	c	1	1	8	outer_fore	outer_hind	1.1	8.18535			482	7	17	R0	RRO	R	928	c	1	1	6	outer_fore	outer_hind	1.25	4.12311				482	12
483	11	0.0168834	gang	gang	S	S	0	3	1	stra_fore	1.21		483	12	69	R0	RRO	R	996	c	1	1	8	outer_fore	outer_hind	1.11	8.30662			483	7	15	R0	RRO	R	929	c	1	1	6	outer_fore	outer_hind	1.22	3.87298				483	12
484	11	0.0162054	gang	gang	S	S	0	3	1	stra_fore	1.18		484	12	66	R0	RRO	R	997	c	1	1	8	outer_fore	outer_hind	1.11	8.12404			484	7	24	R0	RRO	R	932	c	1	1	6	outer_fore	outer_hind	1.24	4.89898				484	12
485	11	0.0183633	gang	gang	S	S	0	3	1	stra_fore	1.18		485	12	62	R0	RRO	R	998	c	1	1	8	outer_fore	outer_hind	1.11	7.87401			485	8	47	R0	RRO	R	939	c	1	5	5	outer_fore	outer_hind	1.22	6.85565				485	12
486	11	0.0134892	gang	gang	S	S	0	3	1	stra_fore	1.18		486	12	66	R0	RRO	R	999	c	1	1	8	outer_fore	outer_hind	1.14	8.12404			486	9	24	R0	RRO	R	954	c	1	3	6	outer_fore	outer_hind	1.12	4.89898				486	12
487	11	0.0112828	gang	gang	S	S	0	3	1	stra_fore	1.16		487	12	61	R0	RRO	R	1000	c	1	1	8	outer_fore	outer_hind	1.07	7.81025			487	9	29	R0	RRO	R	955	c	1	3	6	outer_fore	outer_hind	1.18	5.38516				487	12
488	11	0.0094981	gang	gang	S	S	0	3	1	stra_fore	1.23		488	12	64	R0	RRO	R	1003	c	1	1	8	outer_fore	outer_hind	1.1	8			488	9	25	R0	RRO	R	956	c	1	3	6	outer_fore	outer_hind	1.15	5				488	12
489	11	0.0159592	gang	gang	S	S	0	3	1	stra_fore	1.23		489	12	65	R0	RRO	R	1004	c	1	1	8	outer_fore	outer_hind	1.13	8.06226			489	9	25	R0	RRO	R	957	c	1	3	6	outer_fore	outer_hind	1.14	5				489	12
490	12	0.0275868	gang	gang	S	S	0	1	8	stra_fore	1.11		490	12	66	R0	RRO	R	1005	c	1	1	8	outer_fore	outer_hind	1.14	8.12404			490	9	26	R0	RRO	R	963	c	1	3	6	outer_fore	outer_hind	1.12	5.09902				490	12
491	12	0.0218278	gang	gang	S	S	0	1	8	stra_fore	1.15		491	12	62	R0	RRO	R	1006	c	1	1	8	outer_fore	outer_hind	1.16	7.87401			491	9	23	R0	RRO	R	964	c	1	3	6	outer_fore	outer_hind	1.15	4.79583				491	12
492	12	0.0220839	gang	gang	S	S	0	1	8	stra_fore	1.19		492	12	64	R0	RRO	R	1008	c	1	1	8	outer_fore	outer_hind	1.08	8			492	9	29	R0	RRO	R	966	c	1	3	6	outer_fore	outer_hind	1.15	5.38516				492	12
493	12	0.028061	gang	gang	S	S	0	1	8	stra_fore	1.17		493	12	61	R0	RRO	R	1010	c	1	1	8	outer_fore	outer_hind	1.13	7.81025			493	9	28	R0	RRO	R	967	c	1	3	6	outer_fore	outer_hind	1.18	5.2915				493	12
494	12	0.0380875	gang	gang	S	S	0	1	8	stra_fore	1.2		494	12	62	R0	RRO	R	1011	c	1	1	8	outer_fore	outer_hind	1.14	7.87401			494	9	25	R0	RRO	R	969	c	1	3	6	outer_fore	outer_hind	1.16	5				494	12
495	12	0.0356892	gang	gang	S	S	0	1	8	stra_fore	1.07		495	14	61	R0	RRO	R	1037	c	1	1	9	outer_fore	outer_hind	1.03	7.81025			495	9	24	R0	RRO	R	970	c	1	3	6	outer_fore	outer_hind	1.15	4.89898				495	14
496	12	0.0304167	gang	gang	S	S	0	1	8	stra_fore	1.17		496	14	66	R0	RRO	R	1038	c	1	1	9	outer_fore	outer_hind	1.02	8.12404			496	9	25	R0	RRO	R	971	c	1	3	6	outer_fore	outer_hind	1.15	5				496	14
497	12	0.0293164	gang	gang	S	S	0	1	8	stra_fore	1.2		497	14	61	R0	RRO	R	1044	c	1	1	9	outer_fore	outer_hind	1.04	7.81025			497	9	20	R0	RRO	R	972	c	1	3	6	outer_fore	outer_hind	1.23	4.47214				497	14
498	12	0.0281955	gang	gang	S	S	0	1	8	stra_fore	1.27		498	14	63	R0	RRO	R	1045	c	1	1	9	outer_fore	outer_hind	1.03	7.93725			498	9	21	R0	RRO	R	973	c	1	3	6	outer_fore	outer_hind	1.19	4.58258				498	14
499	12	0.0225225	gang	gang	S	S	0	1	8	stra_fore	1.25		499	14	62	R0	RRO	R	1053	c	1	1	9	outer_fore	outer_hind	1.05	7.87401			499	9	23	R0	RRO	R	975	c	1	3	6	outer_fore	outer_hind	1.15	4.79583				499	14
500	14	0.00876967	gang	gang	S	S	0	1	9	stra_fore	1.24		500	14	62	R0	RRO	R	1054	c	1	1	9	outer_fore	outer_hind	1.02	7.87401			500	9	26	R0	RRO	R	976	c	1	3	6	outer_fore	outer_hind	1.16	5.09902				500	14
501	14	0.0127522	gang	gang	S	S	0	1	9	stra_fore	1.21		501	14	63	R0	RRO	R	1055	c	1	1	9	outer_fore	outer_hind	1.03	7.93725			501	10	26	R0	RRO	R	977	c	1	5	7	outer_fore	outer_hind	1.31	5.09902				501	14
502	14	0.00789009	gang	gang	S	S	0	1	9	stra_fore	1.24		502	14	64	R0	RRO	R	1056	c	1	1	9	outer_fore	outer_hind	1.03	8			502	10	31	R0	RRO	R	980	c	1	5	7	outer_fore	outer_hind	1.28	5.56776				502	14
503	14	0.0163583	gang	gang	S	S	0	1	9	stra_fore	1.21		503	14	63	R0	RRO	R	1057	c	1	1	9	outer_fore	outer_hind	1.04	7.93725			503	10	36	R0	RRO	R	981	c	1	5	7	outer_fore	outer_hind	1.29	6				503	14
504	14	0.0135594	gang	gang	S	S	0	1	9	stra_fore	1.19		504	15	81	R0	RRO	R	1068	c	1	3	10	outer_fore	outer_hind	1.26	9			504	10	31	R0	RRO	R	982	c	1	5	7	outer_fore	outer_hind	1.27	5.56776				504	15
505	14	0.0101017	gang	gang	S	S	0	1	9	stra_fore	1.23		505	15	75	R0	RRO	R	1075	c	1	3	10	outer_fore	outer_hind	1.21	8.66025			505	11	30	R0	RRO	R	989	c	1	3	1	outer_fore	outer_hind	1.38	5.47723				505	15
506	14	0.0168387	gang	gang	S	S	0	1	9	stra_fore	1.21		506	17	80	R0	RRO	R	1103	c	1	1	2	outer_fore	outer_hind	1.16	8.94427			506	11	23	R0	RRO	R	993	c	1	3	1	outer_fore	outer_hind	1.33	4.79583				506	17
507	15	0.0262275	gang	gang	S	S	0	3	10	stra_fore	1.16		507	17	88	R0	RRO	R	1111	c	1	1	2	outer_fore	outer_hind	1.08	9.38083			507	12	29	R0	RRO	R	996	c	1	1	8	outer_fore	outer_hind	1.11	5.38516				507	17
508	15	0.0191231	gang	gang	S	S	0	3	10	stra_fore	1.21		508	17	76	R0	RRO	R	1119	c	1	1	2	outer_fore	outer_hind	1.17	8.7178			508	12	24	R0	RRO	R	997	c	1	1	8	outer_fore	outer_hind	1.11	4.89898				508	17
509	15	0.0206541	gang	gang	S	S	0	3	10	stra_fore	1.19		509	17	70	R0	RRO	R	1122	c	1	1	2	outer_fore	outer_hind	1.21	8.3666			509	12	31	R0	RRO	R	998	c	1	1	8	outer_fore	outer_hind	1.11	5.56776				509	17
510	15	0.0174951	gang	gang	S	S	0	3	10	stra_fore	1.18		510	1	76	gang	gang	S	3182	S	0	1	1	stra_fore	stra_hind	1.46	8.7178			510	12	29	R0	RRO	R	999	c	1	1	8	outer_fore	outer_hind	1.14	5.38516				510	1
511	15	0.0250586	gang	gang	S	S	0	3	10	stra_fore	1.24		511	1	82	gang	gang	S	3183	S	0	1	1	stra_fore	stra_hind	1.43	9.05539			511	12	37	R0	RRO	R	1001	c	1	1	8	outer_fore	outer_hind	1.1	6.08276				511	1
512	15	0.017957	gang	gang	S	S	0	3	10	stra_fore	1.28		512	1	68	gang	gang	S	3184	S	0	1	1	stra_fore	stra_hind	1.1	8.24621			512	12	33	R0	RRO	R	1002	c	1	1	8	outer_fore	outer_hind	1.13	5.74456				512	1
513	15	0.0163404	gang	gang	S	S	0	3	10	stra_fore	1.18		513	1	68	gang	gang	S	3185	S	0	1	1	stra_fore	stra_hind	1.15	8.24621			513	12	31	R0	RRO	R	1003	c	1	1	8	outer_fore	outer_hind	1.1	5.56776				513	1
514	15	0.0239897	gang	gang	S	S	0	3	10	stra_fore	1.17		514	1	62	gang	gang	S	3187	S	0	1	1	stra_fore	stra_hind	1.17	7.87401			514	12	27	R0	RRO	R	1007	c	1	1	8	outer_fore	outer_hind	1.16	5.19615				514	1
515	15	0.0235339	gang	gang	S	S	0	3	10	stra_fore	1.23		515	1	65	gang	gang	S	3188	S	0	1	1	stra_fore	stra_hind	1.15	8.06226			515	12	30	R0	RRO	R	1010	c	1	1	8	outer_fore	outer_hind	1.13	5.47723				515	1
516	15	0.0204774	gang	gang	S	S	0	3	10	stra_fore	1.23		516	1	64	gang	gang	S	3189	S	0	1	1	stra_fore	stra_hind	1.15	8			516	12	29	R0	RRO	R	1011	c	1	1	8	outer_fore	outer_hind	1.14	5.38516				516	1
517	15	0.0173538	gang	gang	S	S	0	3	10	stra_fore	1.18		517	1	64	gang	gang	S	3192	S	0	1	1	stra_fore	stra_hind	1.14	8			517	14	11	R0	RRO	R	1039	c	1	1	9	outer_fore	outer_hind	1.04	3.31662				517	1
518	15	0.017205	gang	gang	S	S	0	3	10	stra_fore	1.15		518	1	61	gang	gang	S	3193	S	0	1	1	stra_fore	stra_hind	1.2	7.81025			518	14	22	R0	RRO	R	1040	c	1	1	9	outer_fore	outer_hind	1.11	4.69042				518	1
519	15	0.0200032	gang	gang	S	S	0	3	10	stra_fore	1.18		519	1	62	gang	gang	S	3195	S	0	1	1	stra_fore	stra_hind	1.18	7.87401			519	14	19	R0	RRO	R	1041	c	1	1	9	outer_fore	outer_hind	1.09	4.3589				519	1
520	17	0.0168201	gang	gang	S	S	0	1	2	stra_fore	1.14		520	2	78	gang	gang	S	3197	S	0	3	2	stra_fore	stra_hind	1.29	8.83176			520	14	23	R0	RRO	R	1042	c	1	1	9	outer_fore	outer_hind	1.09	4.79583				520	2
521	17	0.0177502	gang	gang	S	S	0	1	2	stra_fore	1.14		521	2	82	gang	gang	S	3198	S	0	3	2	stra_fore	stra_hind	1.21	9.05539			521	14	23	R0	RRO	R	1043	c	1	1	9	outer_fore	outer_hind	1.07	4.79583				521	2
522	17	0.0212088	gang	gang	S	S	0	1	2	stra_fore	1.13		522	2	79	gang	gang	S	3199	S	0	3	2	stra_fore	stra_hind	1.18	8.88819			522	14	21	R0	RRO	R	1044	c	1	1	9	outer_fore	outer_hind	1.04	4.58258				522	2
523	17	0.0185365	gang	gang	S	S	0	1	2	stra_fore	1.13		523	2	66	gang	gang	S	3200	S	0	3	2	stra_fore	stra_hind	1.23	8.12404			523	14	22	R0	RRO	R	1046	c	1	1	9	outer_fore	outer_hind	1.05	4.69042				523	2
524	17	0.0180517	gang	gang	S	S	0	1	2	stra_fore	1.14		524	2	67	gang	gang	S	3201	S	0	3	2	stra_fore	stra_hind	1.21	8.18535			524	14	16	R0	RRO	R	1050	c	1	1	9	outer_fore	outer_hind	1.03	4				524	2
525	17	0.018485	gang	gang	S	S	0	1	2	stra_fore	1.15		525	2	68	gang	gang	S	3202	S	0	3	2	stra_fore	stra_hind	1.25	8.24621			525	14	24	R0	RRO	R	1053	c	1	1	9	outer_fore	outer_hind	1.05	4.89898				525	2
526	17	0.0205778	gang	gang	S	S	0	1	2	stra_fore	1.16		526	2	66	gang	gang	S	3203	S	0	3	2	stra_fore	stra_hind	1.23	8.12404			526	14	25	R0	RRO	R	1054	c	1	1	9	outer_fore	outer_hind	1.02	5				526	2
527	17	0.0175746	gang	gang	S	S	0	1	2	stra_fore	1.21		527	2	65	gang	gang	S	3204	S	0	3	2	stra_fore	stra_hind	1.29	8.06226			527	14	27	R0	RRO	R	1055	c	1	1	9	outer_fore	outer_hind	1.03	5.19615				527	2
528	17	0.0159778	gang	gang	S	S	0	1	2	stra_fore	1.27		528	3	87	gang	gang	S	3207	S	0	2	3	stra_fore	stra_hind	1.24	9.32738			528	14	20	R0	RRO	R	1058	c	1	1	9	outer_fore	outer_hind	1.05	4.47214				528	3
529	17	0.0105567	gang	gang	S	S	0	1	2	stra_fore	1.34		529	3	81	gang	gang	S	3208	S	0	2	3	stra_fore	stra_hind	1.25	9			529	14	21	R0	RRO	R	1059	c	1	1	9	outer_fore	outer_hind	1.09	4.58258				529	3
530	17	0.0213501	gang	gang	S	S	0	1	2	stra_fore	1.26		530	3	83	gang	gang	S	3211	S	0	2	3	stra_fore	stra_hind	1.33	9.11043			530	14	24	R0	RRO	R	1064	c	1	1	9	outer_fore	outer_hind	1.05	4.89898				530	3
531	1	0.0243667	gang	gang1	S	S	0	1	1	stra_fore	0.96		531	3	80	gang	gang	S	3212	S	0	2	3	stra_fore	stra_hind	1.35	8.94427			531	15	46	R0	RRO	R	1065	c	1	3	10	outer_fore	outer_hind	1.16	6.78233				531	3
532	1	0.0340405	gang	gang1	S	S	0	1	1	stra_fore	1.13		532	3	83	gang	gang	S	3213	S	0	2	3	stra_fore	stra_hind	1.3	9.11043			532	15	13	R0	RRO	R	1068	c	1	3	10	outer_fore	outer_hind	1.26	3.60555				532	3
533	1	0.0166518	gang	gang1	S	S	0	1	1	stra_fore	1.11		533	3	85	gang	gang	S	3214	S	0	2	3	stra_fore	stra_hind	1.29	9.21954			533	15	42	R0	RRO	R	1069	c	1	3	10	outer_fore	outer_hind	1.22	6.48074				533	3
534	1	0.0306547	gang	gang1	S	S	0	1	1	stra_fore	1.12		534	3	82	gang	gang	S	3215	S	0	2	3	stra_fore	stra_hind	1.26	9.05539			534	15	46	R0	RRO	R	1070	c	1	3	10	outer_fore	outer_hind	1.21	6.78233				534	3
535	2	0.0233178	gang	gang1	S	S	0	3	2	stra_fore	1.14		535	5	67	gang	gang	S	3225	S	0	4	5	stra_fore	stra_hind	1.31	8.18535			535	15	47	R0	RRO	R	1071	c	1	3	10	outer_fore	outer_hind	1.23	6.85565				535	5
536	2	0.0185242	gang	gang1	S	S	0	3	2	stra_fore	1.19		536	5	62	gang	gang	S	3227	S	0	4	5	stra_fore	stra_hind	1.31	7.87401			536	15	48	R0	RRO	R	1073	c	1	3	10	outer_fore	outer_hind	1.18	6.9282				536	5
537	2	0.0250862	gang	gang1	S	S	0	3	2	stra_fore	1.17		537	5	61	gang	gang	S	3230	S	0	4	5	stra_fore	stra_hind	1.34	7.81025			537	17	33	R0	RRO	R	1103	c	1	1	2	outer_fore	outer_hind	1.16	5.74456				537	5
538	2	0.0285903	gang	gang1	S	S	0	3	2	stra_fore	1.17		538	7	76	gang	gang	S	3244	S	0	1	6	stra_fore	stra_hind	1.46	8.7178			538	17	28	R0	RRO	R	1104	c	1	1	2	outer_fore	outer_hind	1.15	5.2915				538	7
539	2	0.0228943	gang	gang1	S	S	0	3	2	stra_fore	1.18		539	7	82	gang	gang	S	3245	S	0	1	6	stra_fore	stra_hind	1.43	9.05539			539	17	29	R0	RRO	R	1105	c	1	1	2	outer_fore	outer_hind	1.15	5.38516				539	7
540	2	0.0238934	gang	gang1	S	S	0	3	2	stra_fore	1.21		540	7	68	gang	gang	S	3246	S	0	1	6	stra_fore	stra_hind	1.1	8.24621			540	17	28	R0	RRO	R	1106	c	1	1	2	outer_fore	outer_hind	1.16	5.2915				540	7
541	2	0.0245403	gang	gang1	S	S	0	3	2	stra_fore	1.4		541	7	68	gang	gang	S	3247	S	0	1	6	stra_fore	stra_hind	1.15	8.24621			541	17	28	R0	RRO	R	1107	c	1	1	2	outer_fore	outer_hind	1.18	5.2915				541	7
542	2	0.020153	gang	gang1	S	S	0	3	2	stra_fore	1.44		542	7	62	gang	gang	S	3249	S	0	1	6	stra_fore	stra_hind	1.17	7.87401			542	17	28	R0	RRO	R	1109	c	1	1	2	outer_fore	outer_hind	1.26	5.2915				542	7
543	2	0.0235908	gang	gang1	S	S	0	3	2	stra_fore	1.32		543	7	65	gang	gang	S	3250	S	0	1	6	stra_fore	stra_hind	1.15	8.06226			543	17	18	R0	RRO	R	1110	c	1	1	2	outer_fore	outer_hind	1.19	4.24264				543	7
544	3	0.0257854	gang	gang1	S	S	0	2	3	stra_fore	1.31		544	7	64	gang	gang	S	3251	S	0	1	6	stra_fore	stra_hind	1.15	8			544	17	20	R0	RRO	R	1111	c	1	1	2	outer_fore	outer_hind	1.08	4.47214				544	7
545	3	0.0279867	gang	gang1	S	S	0	2	3	stra_fore	1.25		545	7	64	gang	gang	S	3254	S	0	1	6	stra_fore	stra_hind	1.14	8			545	17	30	R0	RRO	R	1112	c	1	1	2	outer_fore	outer_hind	1.22	5.47723				545	7
546	3	0.0294335	gang	gang1	S	S	0	2	3	stra_fore	1.3		546	7	61	gang	gang	S	3255	S	0	1	6	stra_fore	stra_hind	1.2	7.81025			546	17	21	R0	RRO	R	1113	c	1	1	2	outer_fore	outer_hind	1.1	4.58258				546	7
547	3	0.0312667	gang	gang1	S	S	0	2	3	stra_fore	1.29		547	7	62	gang	gang	S	3257	S	0	1	6	stra_fore	stra_hind	1.18	7.87401			547	17	33	R0	RRO	R	1116	c	1	1	2	outer_fore	outer_hind	1.16	5.74456				547	7
548	3	0.0266373	gang	gang1	S	S	0	2	3	stra_fore	1.24		548	8	77	gang	gang	S	3259	S	0	5	5	stra_fore	stra_hind	1.15	8.77496			548	17	32	R0	RRO	R	1119	c	1	1	2	outer_fore	outer_hind	1.17	5.65685				548	8
549	5	0.020615	gang	gang1	S	S	0	4	5	stra_fore	1.22		549	8	78	gang	gang	S	3260	S	0	5	5	stra_fore	stra_hind	1.14	8.83176			549	17	27	R0	RRO	R	1120	c	1	1	2	outer_fore	outer_hind	1.15	5.19615				549	8
550	5	0.0209809	gang	gang1	S	S	0	4	5	stra_fore	1.2		550	8	73	gang	gang	S	3261	S	0	5	5	stra_fore	stra_hind	1.14	8.544			550	17	28	R0	RRO	R	1122	c	1	1	2	outer_fore	outer_hind	1.21	5.2915				550	8
551	5	0.0170655	gang	gang1	S	S	0	4	5	stra_fore	1.24		551	8	75	gang	gang	S	3263	S	0	5	5	stra_fore	stra_hind	1.19	8.66025			551	17	24	R0	RRO	R	1123	c	1	1	2	outer_fore	outer_hind	1.14	4.89898				551	8
552	5	0.0170091	gang	gang1	S	S	0	4	5	stra_fore	1.25		552	8	79	gang	gang	S	3264	S	0	5	5	stra_fore	stra_hind	1.22	8.88819			552	17	26	R0	RRO	R	1124	c	1	1	2	outer_fore	outer_hind	1.09	5.09902				552	8
553	5	0.0140886	gang	gang1	S	S	0	4	5	stra_fore	1.24		553	8	74	gang	gang	S	3265	S	0	5	5	stra_fore	stra_hind	1.23	8.60233			553	17	33	R0	RRO	R	1125	c	1	1	2	outer_fore	outer_hind	1.17	5.74456				553	8
554	5	0.0177141	gang	gang1	S	S	0	4	5	stra_fore	1.22		554	8	66	gang	gang	S	3266	S	0	5	5	stra_fore	stra_hind	1.2	8.12404			554	17	30	R0	RRO	R	1129	c	1	1	2	outer_fore	outer_hind	1.21	5.47723				554	8
555	5	0.0169449	gang	gang1	S	S	0	4	5	stra_fore	1.27		555	8	68	gang	gang	S	3267	S	0	5	5	stra_fore	stra_hind	1.21	8.24621			555	17	28	R0	RRO	R	1130	c	1	1	2	outer_fore	outer_hind	1.25	5.2915				555	8
556	5	0.0195672	gang	gang1	S	S	0	4	5	stra_fore	1.24		556	8	76	gang	gang	S	3268	S	0	5	5	stra_fore	stra_hind	1.25	8.7178			556	17	30	R0	RRO	R	1134	c	1	1	2	outer_fore	outer_hind	1.14	5.47723				556	8
557	5	0.0122963	gang	gang1	S	S	0	4	5	stra_fore	1.25		557	8	70	gang	gang	S	3269	S	0	5	5	stra_fore	stra_hind	1.25	8.3666			557	17	36	R0	RRO	R	1136	c	1	1	2	outer_fore	outer_hind	1.15	6				557	8
558	7	0.0243667	gang	gang1	S	S	0	1	6	stra_fore	0.96		558	8	73	gang	gang	S	3270	S	0	5	5	stra_fore	stra_hind	1.25	8.544			558	1	44	gang	gang	S	3183	S	0	1	1	stra_fore	stra_hind	1.43	6.63325				558	8
559	7	0.0340405	gang	gang1	S	S	0	1	6	stra_fore	1.13		559	8	76	gang	gang	S	3271	S	0	5	5	stra_fore	stra_hind	1.25	8.7178			559	1	21	gang	gang	S	3184	S	0	1	1	stra_fore	stra_hind	1.1	4.58258				559	8
560	7	0.0166518	gang	gang1	S	S	0	1	6	stra_fore	1.11		560	9	77	gang	gang	S	3274	S	0	3	6	stra_fore	stra_hind	1.08	8.77496			560	1	22	gang	gang	S	3185	S	0	1	1	stra_fore	stra_hind	1.15	4.69042				560	9
561	7	0.0306547	gang	gang1	S	S	0	1	6	stra_fore	1.12		561	9	77	gang	gang	S	3275	S	0	3	6	stra_fore	stra_hind	1.1	8.77496			561	1	18	gang	gang	S	3187	S	0	1	1	stra_fore	stra_hind	1.17	4.24264				561	9
562	8	0.00836894	gang	gang1	S	S	0	5	5	stra_fore	1.24		562	10	87	gang	gang	S	3278	S	0	5	7	stra_fore	stra_hind	1.18	9.32738			562	1	15	gang	gang	S	3188	S	0	1	1	stra_fore	stra_hind	1.15	3.87298				562	10
563	8	0.00777366	gang	gang1	S	S	0	5	5	stra_fore	1.18		563	10	83	gang	gang	S	3279	S	0	5	7	stra_fore	stra_hind	1.2	9.11043			563	1	15	gang	gang	S	3189	S	0	1	1	stra_fore	stra_hind	1.15	3.87298				563	10
564	8	0.00936639	gang	gang1	S	S	0	5	5	stra_fore	1.15		564	10	91	gang	gang	S	3280	S	0	5	7	stra_fore	stra_hind	1.19	9.53939			564	1	15	gang	gang	S	3191	S	0	1	1	stra_fore	stra_hind	1.15	3.87298				564	10
565	8	0.0120037	gang	gang1	S	S	0	5	5	stra_fore	1.16		565	10	83	gang	gang	S	3281	S	0	5	7	stra_fore	stra_hind	1.17	9.11043			565	1	15	gang	gang	S	3192	S	0	1	1	stra_fore	stra_hind	1.14	3.87298				565	10
566	8	0.0138694	gang	gang1	S	S	0	5	5	stra_fore	1.18		566	10	72	gang	gang	S	3282	S	0	5	7	stra_fore	stra_hind	1.22	8.48528			566	1	14	gang	gang	S	3193	S	0	1	1	stra_fore	stra_hind	1.2	3.74166				566	10
567	8	0.0110196	gang	gang1	S	S	0	5	5	stra_fore	1.17		567	10	67	gang	gang	S	3283	S	0	5	7	stra_fore	stra_hind	1.22	8.18535			567	1	15	gang	gang	S	3195	S	0	1	1	stra_fore	stra_hind	1.18	3.87298				567	10
568	8	0.01216	gang	gang1	S	S	0	5	5	stra_fore	1.17		568	10	80	gang	gang	S	3284	S	0	5	7	stra_fore	stra_hind	1.26	8.94427			568	2	24	gang	gang	S	3197	S	0	3	2	stra_fore	stra_hind	1.29	4.89898				568	10
569	8	0.0143159	gang	gang1	S	S	0	5	5	stra_fore	1.14		569	10	71	gang	gang	S	3285	S	0	5	7	stra_fore	stra_hind	1.2	8.42615			569	2	21	gang	gang	S	3198	S	0	3	2	stra_fore	stra_hind	1.21	4.58258				569	10
570	9	0.00895163	gang	gang1	S	S	0	3	6	stra_fore	1.15		570	10	85	gang	gang	S	3287	S	0	5	7	stra_fore	stra_hind	1.17	9.21954			570	2	17	gang	gang	S	3199	S	0	3	2	stra_fore	stra_hind	1.18	4.12311				570	10
571	9	0.0162664	gang	gang1	S	S	0	3	6	stra_fore	1.11		571	11	70	gang	gang	S	3289	S	0	3	1	stra_fore	stra_hind	1.13	8.3666			571	2	20	gang	gang	S	3200	S	0	3	2	stra_fore	stra_hind	1.23	4.47214				571	11
572	9	0.0166732	gang	gang1	S	S	0	3	6	stra_fore	1.11		572	11	73	gang	gang	S	3290	S	0	3	1	stra_fore	stra_hind	1.19	8.544			572	2	17	gang	gang	S	3201	S	0	3	2	stra_fore	stra_hind	1.21	4.12311				572	11
573	9	0.00959859	gang	gang1	S	S	0	3	6	stra_fore	1.17		573	11	78	gang	gang	S	3291	S	0	3	1	stra_fore	stra_hind	1.16	8.83176			573	2	19	gang	gang	S	3202	S	0	3	2	stra_fore	stra_hind	1.25	4.3589				573	11
574	9	0.00949258	gang	gang1	S	S	0	3	6	stra_fore	1.12		574	11	74	gang	gang	S	3292	S	0	3	1	stra_fore	stra_hind	1.16	8.60233			574	2	14	gang	gang	S	3203	S	0	3	2	stra_fore	stra_hind	1.23	3.74166				574	11
575	9	0.0209275	gang	gang1	S	S	0	3	6	stra_fore	1.14		575	11	78	gang	gang	S	3293	S	0	3	1	stra_fore	stra_hind	1.18	8.83176			575	2	16	gang	gang	S	3204	S	0	3	2	stra_fore	stra_hind	1.29	4				575	11
576	10	0.0251763	gang	gang1	S	S	0	5	7	stra_fore	1.26		576	11	78	gang	gang	S	3294	S	0	3	1	stra_fore	stra_hind	1.17	8.83176			576	3	27	gang	gang	S	3207	S	0	2	3	stra_fore	stra_hind	1.24	5.19615				576	11
577	10	0.0327036	gang	gang1	S	S	0	5	7	stra_fore	1.26		577	11	77	gang	gang	S	3295	S	0	3	1	stra_fore	stra_hind	1.21	8.77496			577	3	27	gang	gang	S	3208	S	0	2	3	stra_fore	stra_hind	1.25	5.19615				577	11
578	10	0.0219823	gang	gang1	S	S	0	5	7	stra_fore	1.23		578	11	72	gang	gang	S	3296	S	0	3	1	stra_fore	stra_hind	1.18	8.48528			578	3	30	gang	gang	S	3211	S	0	2	3	stra_fore	stra_hind	1.33	5.47723				578	11
579	10	0.025599	gang	gang1	S	S	0	5	7	stra_fore	1.25		579	11	74	gang	gang	S	3297	S	0	3	1	stra_fore	stra_hind	1.18	8.60233			579	3	32	gang	gang	S	3212	S	0	2	3	stra_fore	stra_hind	1.35	5.65685				579	11
580	10	0.0265143	gang	gang1	S	S	0	5	7	stra_fore	1.28		580	11	72	gang	gang	S	3298	S	0	3	1	stra_fore	stra_hind	1.18	8.48528			580	3	29	gang	gang	S	3213	S	0	2	3	stra_fore	stra_hind	1.3	5.38516				580	11
581	10	0.017274	gang	gang1	S	S	0	5	7	stra_fore	1.21		581	11	82	gang	gang	S	3299	S	0	3	1	stra_fore	stra_hind	1.16	9.05539			581	3	29	gang	gang	S	3214	S	0	2	3	stra_fore	stra_hind	1.29	5.38516				581	11
582	10	0.0132197	gang	gang1	S	S	0	5	7	stra_fore	1.3		582	11	79	gang	gang	S	3300	S	0	3	1	stra_fore	stra_hind	1.23	8.88819			582	3	25	gang	gang	S	3215	S	0	2	3	stra_fore	stra_hind	1.26	5				582	11
583	11	0.0118763	gang	gang1	S	S	0	3	1	stra_fore	1.25		583	11	79	gang	gang	S	3301	S	0	3	1	stra_fore	stra_hind	1.23	8.88819			583	5	18	gang	gang	S	3224	S	0	4	5	stra_fore	stra_hind	1.27	4.24264				583	11
584	11	0.0150936	gang	gang1	S	S	0	3	1	stra_fore	1.17		584	12	62	gang	gang	S	3302	S	0	1	8	stra_fore	stra_hind	1.11	7.87401			584	5	18	gang	gang	S	3225	S	0	4	5	stra_fore	stra_hind	1.31	4.24264				584	12
585	11	0.0120804	gang	gang1	S	S	0	3	1	stra_fore	1.14		585	12	67	gang	gang	S	3303	S	0	1	8	stra_fore	stra_hind	1.15	8.18535			585	5	15	gang	gang	S	3226	S	0	4	5	stra_fore	stra_hind	1.28	3.87298				585	12
586	11	0.0158919	gang	gang1	S	S	0	3	1	stra_fore	1.18		586	12	70	gang	gang	S	3304	S	0	1	8	stra_fore	stra_hind	1.19	8.3666			586	5	13	gang	gang	S	3227	S	0	4	5	stra_fore	stra_hind	1.31	3.60555				586	12
587	11	0.0155888	gang	gang1	S	S	0	3	1	stra_fore	1.17		587	12	66	gang	gang	S	3305	S	0	1	8	stra_fore	stra_hind	1.17	8.12404			587	5	20	gang	gang	S	3228	S	0	4	5	stra_fore	stra_hind	1.32	4.47214				587	12
588	11	0.0118248	gang	gang1	S	S	0	3	1	stra_fore	1.12		588	12	66	gang	gang	S	3306	S	0	1	8	stra_fore	stra_hind	1.2	8.12404			588	5	16	gang	gang	S	3229	S	0	4	5	stra_fore	stra_hind	1.29	4				588	12
589	11	0.0181396	gang	gang1	S	S	0	3	1	stra_fore	1.13		589	12	61	gang	gang	S	3307	S	0	1	8	stra_fore	stra_hind	1.07	7.81025			589	5	18	gang	gang	S	3230	S	0	4	5	stra_fore	stra_hind	1.34	4.24264				589	12
590	11	0.0136213	gang	gang1	S	S	0	3	1	stra_fore	1.17		590	12	66	gang	gang	S	3308	S	0	1	8	stra_fore	stra_hind	1.17	8.12404			590	7	44	gang	gang	S	3245	S	0	1	6	stra_fore	stra_hind	1.43	6.63325				590	12
591	11	0.0178451	gang	gang1	S	S	0	3	1	stra_fore	1.16		591	12	61	gang	gang	S	3309	S	0	1	8	stra_fore	stra_hind	1.2	7.81025			591	7	21	gang	gang	S	3246	S	0	1	6	stra_fore	stra_hind	1.1	4.58258				591	12
592	11	0.0228195	gang	gang1	S	S	0	3	1	stra_fore	1.18		592	12	64	gang	gang	S	3310	S	0	1	8	stra_fore	stra_hind	1.27	8			592	7	22	gang	gang	S	3247	S	0	1	6	stra_fore	stra_hind	1.15	4.69042				592	12
593	12	0.0258472	gang	gang1	S	S	0	1	8	stra_fore	1.02		593	12	67	gang	gang	S	3312	S	0	1	8	stra_fore	stra_hind	1.25	8.18535			593	7	18	gang	gang	S	3249	S	0	1	6	stra_fore	stra_hind	1.17	4.24264				593	12
594	12	0.015153	gang	gang1	S	S	0	1	8	stra_fore	1.18		594	14	80	gang	gang	S	3324	S	0	1	9	stra_fore	stra_hind	1.24	8.94427			594	7	15	gang	gang	S	3250	S	0	1	6	stra_fore	stra_hind	1.15	3.87298				594	14
595	12	0.0319087	gang	gang1	S	S	0	1	8	stra_fore	1.15		595	14	80	gang	gang	S	3325	S	0	1	9	stra_fore	stra_hind	1.21	8.94427			595	7	15	gang	gang	S	3251	S	0	1	6	stra_fore	stra_hind	1.15	3.87298				595	14
596	12	0.0406322	gang	gang1	S	S	0	1	8	stra_fore	1.16		596	14	85	gang	gang	S	3326	S	0	1	9	stra_fore	stra_hind	1.24	9.21954			596	7	15	gang	gang	S	3253	S	0	1	6	stra_fore	stra_hind	1.15	3.87298				596	14
597	12	0.0306542	gang	gang1	S	S	0	1	8	stra_fore	1.19		597	14	87	gang	gang	S	3327	S	0	1	9	stra_fore	stra_hind	1.21	9.32738			597	7	15	gang	gang	S	3254	S	0	1	6	stra_fore	stra_hind	1.14	3.87298				597	14
598	12	0.031731	gang	gang1	S	S	0	1	8	stra_fore	1.23		598	14	81	gang	gang	S	3328	S	0	1	9	stra_fore	stra_hind	1.19	9			598	7	14	gang	gang	S	3255	S	0	1	6	stra_fore	stra_hind	1.2	3.74166				598	14
599	12	0.0249921	gang	gang1	S	S	0	1	8	stra_fore	1.16		599	14	86	gang	gang	S	3330	S	0	1	9	stra_fore	stra_hind	1.23	9.27362			599	7	15	gang	gang	S	3257	S	0	1	6	stra_fore	stra_hind	1.18	3.87298				599	14
600	12	0.0145891	gang	gang1	S	S	0	1	8	stra_fore	1.23		600	14	89	gang	gang	S	3333	S	0	1	9	stra_fore	stra_hind	1.21	9.43398			600	8	20	gang	gang	S	3259	S	0	5	5	stra_fore	stra_hind	1.15	4.47214				600	14
601	14	0.0126093	gang	gang1	S	S	0	1	9	stra_fore	1.17		601	15	84	gang	gang	S	3334	S	0	3	10	stra_fore	stra_hind	1.16	9.16515			601	8	18	gang	gang	S	3260	S	0	5	5	stra_fore	stra_hind	1.14	4.24264				601	15
602	14	0.00938912	gang	gang1	S	S	0	1	9	stra_fore	1.21		602	15	72	gang	gang	S	3335	S	0	3	10	stra_fore	stra_hind	1.21	8.48528			602	8	16	gang	gang	S	3263	S	0	5	5	stra_fore	stra_hind	1.19	4				602	15
603	14	0.0214717	gang	gang1	S	S	0	1	9	stra_fore	1.2		603	15	84	gang	gang	S	3336	S	0	3	10	stra_fore	stra_hind	1.19	9.16515			603	8	20	gang	gang	S	3264	S	0	5	5	stra_fore	stra_hind	1.22	4.47214				603	15
604	15	0.0187108	gang	gang1	S	S	0	3	10	stra_fore	1.2		604	15	70	gang	gang	S	3337	S	0	3	10	stra_fore	stra_hind	1.18	8.3666			604	8	19	gang	gang	S	3266	S	0	5	5	stra_fore	stra_hind	1.2	4.3589				604	15
605	15	0.0222945	gang	gang1	S	S	0	3	10	stra_fore	1.19		605	15	79	gang	gang	S	3338	S	0	3	10	stra_fore	stra_hind	1.24	8.88819			605	8	19	gang	gang	S	3267	S	0	5	5	stra_fore	stra_hind	1.21	4.3589				605	15
606	15	0.0246889	gang	gang1	S	S	0	3	10	stra_fore	1.23		606	15	81	gang	gang	S	3339	S	0	3	10	stra_fore	stra_hind	1.28	9			606	8	19	gang	gang	S	3268	S	0	5	5	stra_fore	stra_hind	1.25	4.3589				606	15
607	15	0.0210432	gang	gang1	S	S	0	3	10	stra_fore	1.16		607	15	74	gang	gang	S	3340	S	0	3	10	stra_fore	stra_hind	1.18	8.60233			607	8	23	gang	gang	S	3269	S	0	5	5	stra_fore	stra_hind	1.25	4.79583				607	15
608	15	0.0191307	gang	gang1	S	S	0	3	10	stra_fore	1.18		608	15	65	gang	gang	S	3341	S	0	3	10	stra_fore	stra_hind	1.17	8.06226			608	8	38	gang	gang	S	3270	S	0	5	5	stra_fore	stra_hind	1.25	6.16441				608	15
609	15	0.0275572	gang	gang1	S	S	0	3	10	stra_fore	1.17		609	15	66	gang	gang	S	3342	S	0	3	10	stra_fore	stra_hind	1.23	8.12404			609	8	25	gang	gang	S	3271	S	0	5	5	stra_fore	stra_hind	1.25	5				609	15
610	15	0.025704	gang	gang1	S	S	0	3	10	stra_fore	1.14		610	15	66	gang	gang	S	3343	S	0	3	10	stra_fore	stra_hind	1.23	8.12404			610	9	21	gang	gang	S	3274	S	0	3	6	stra_fore	stra_hind	1.08	4.58258				610	15
611	15	0.0284999	gang	gang1	S	S	0	3	10	stra_fore	1.17		611	15	81	gang	gang	S	3344	S	0	3	10	stra_fore	stra_hind	1.18	9			611	9	19	gang	gang	S	3275	S	0	3	6	stra_fore	stra_hind	1.1	4.3589				611	15
612	15	0.0176142	gang	gang1	S	S	0	3	10	stra_fore	1.13		612	15	71	gang	gang	S	3345	S	0	3	10	stra_fore	stra_hind	1.15	8.42615			612	9	21	gang	gang	S	3276	S	0	3	6	stra_fore	stra_hind	1.09	4.58258				612	15
613	15	0.0169529	gang	gang1	S	S	0	3	10	stra_fore	1.19		613	15	62	gang	gang	S	3347	S	0	3	10	stra_fore	stra_hind	1.18	7.87401			613	10	27	gang	gang	S	3278	S	0	5	7	stra_fore	stra_hind	1.18	5.19615				613	15
614	15	0.0245288	gang	gang1	S	S	0	3	10	stra_fore	1.21		614	17	80	gang	gang	S	3362	S	0	1	2	stra_fore	stra_hind	1.14	8.94427			614	10	28	gang	gang	S	3279	S	0	5	7	stra_fore	stra_hind	1.2	5.2915				614	17
615	15	0.0152579	gang	gang1	S	S	0	3	10	stra_fore	1.23		615	17	78	gang	gang	S	3363	S	0	1	2	stra_fore	stra_hind	1.14	8.83176			615	10	26	gang	gang	S	3280	S	0	5	7	stra_fore	stra_hind	1.19	5.09902				615	17
616	17	0.0152957	gang	gang1	S	S	0	1	2	stra_fore	1.21		616	17	79	gang	gang	S	3364	S	0	1	2	stra_fore	stra_hind	1.13	8.88819			616	10	22	gang	gang	S	3281	S	0	5	7	stra_fore	stra_hind	1.17	4.69042				616	17
617	17	0.0137872	gang	gang1	S	S	0	1	2	stra_fore	1.21		617	17	79	gang	gang	S	3365	S	0	1	2	stra_fore	stra_hind	1.13	8.88819			617	10	28	gang	gang	S	3282	S	0	5	7	stra_fore	stra_hind	1.22	5.2915				617	17
618	17	0.0203247	gang	gang1	S	S	0	1	2	stra_fore	1.2		618	17	78	gang	gang	S	3366	S	0	1	2	stra_fore	stra_hind	1.14	8.83176			618	10	25	gang	gang	S	3283	S	0	5	7	stra_fore	stra_hind	1.22	5				618	17
619	17	0.017268	gang	gang1	S	S	0	1	2	stra_fore	1.17		619	17	80	gang	gang	S	3367	S	0	1	2	stra_fore	stra_hind	1.15	8.94427			619	10	25	gang	gang	S	3284	S	0	5	7	stra_fore	stra_hind	1.26	5				619	17
620	17	0.0199309	gang	gang1	S	S	0	1	2	stra_fore	1.18		620	17	77	gang	gang	S	3368	S	0	1	2	stra_fore	stra_hind	1.16	8.77496			620	10	24	gang	gang	S	3285	S	0	5	7	stra_fore	stra_hind	1.2	4.89898				620	17
621	17	0.0245896	gang	gang1	S	S	0	1	2	stra_fore	1.19		621	17	69	gang	gang	S	3369	S	0	1	2	stra_fore	stra_hind	1.21	8.30662			621	10	25	gang	gang	S	3287	S	0	5	7	stra_fore	stra_hind	1.17	5				621	17
622	17	0.0153589	gang	gang1	S	S	0	1	2	stra_fore	1.22		622	17	79	gang	gang	S	3370	S	0	1	2	stra_fore	stra_hind	1.27	8.88819			622	10	28	gang	gang	S	3288	S	0	5	7	stra_fore	stra_hind	1.28	5.2915				622	17
623	17	0.0135471	gang	gang1	S	S	0	1	2	stra_fore	1.16		623	17	75	gang	gang	S	3371	S	0	1	2	stra_fore	stra_hind	1.34	8.66025			623	11	13	gang	gang	S	3289	S	0	3	1	stra_fore	stra_hind	1.13	3.60555				623	17
624	17	0.0237498	gang	gang1	S	S	0	1	2	stra_fore	1.35		624	17	69	gang	gang	S	3372	S	0	1	2	stra_fore	stra_hind	1.26	8.30662			624	11	14	gang	gang	S	3290	S	0	3	1	stra_fore	stra_hind	1.19	3.74166				624	17
625	17	0.014421	gang	gang1	S	S	0	1	2	stra_fore	1.25		625	1	86	gang	gang1	S	3385	S	0	1	1	stra_fore	stra_hind	0.96	9.27362			625	11	15	gang	gang	S	3291	S	0	3	1	stra_fore	stra_hind	1.16	3.87298				625	1
626	1	0.0124973	U0	ULO	L	c	0	1	1	outer_fore	1.33		626	1	64	gang	gang1	S	3386	S	0	1	1	stra_fore	stra_hind	1.13	8			626	11	15	gang	gang	S	3292	S	0	3	1	stra_fore	stra_hind	1.16	3.87298				626	1
627	1	0.0191844	U0	ULO	L	c	0	1	1	outer_fore	1.29		627	1	75	gang	gang1	S	3387	S	0	1	1	stra_fore	stra_hind	1.11	8.66025			627	11	15	gang	gang	S	3293	S	0	3	1	stra_fore	stra_hind	1.18	3.87298				627	1
628	1	0.0176734	U0	ULO	L	c	0	1	1	outer_fore	1.31		628	1	69	gang	gang1	S	3388	S	0	1	1	stra_fore	stra_hind	1.12	8.30662			628	11	13	gang	gang	S	3294	S	0	3	1	stra_fore	stra_hind	1.17	3.60555				628	1
629	2	0.0158402	U0	ULO	L	c	0	3	2	outer_fore	1.32		629	2	81	gang	gang1	S	3389	S	0	3	2	stra_fore	stra_hind	1.14	9			629	11	16	gang	gang	S	3295	S	0	3	1	stra_fore	stra_hind	1.21	4				629	2
630	2	0.0238181	U0	ULO	L	c	0	3	2	outer_fore	1.34		630	2	80	gang	gang1	S	3390	S	0	3	2	stra_fore	stra_hind	1.19	8.94427			630	11	15	gang	gang	S	3296	S	0	3	1	stra_fore	stra_hind	1.18	3.87298				630	2
631	2	0.0191615	U0	ULO	L	c	0	3	2	outer_fore	1.28		631	2	66	gang	gang1	S	3391	S	0	3	2	stra_fore	stra_hind	1.17	8.12404			631	11	14	gang	gang	S	3297	S	0	3	1	stra_fore	stra_hind	1.18	3.74166				631	2
632	3	0.0161013	U0	ULO	L	c	0	2	3	outer_fore	1.5		632	2	71	gang	gang1	S	3392	S	0	3	2	stra_fore	stra_hind	1.17	8.42615			632	11	16	gang	gang	S	3298	S	0	3	1	stra_fore	stra_hind	1.18	4				632	2
633	4	0.0219174	U0	ULO	L	c	0	2	4	outer_fore	1.21		633	2	67	gang	gang1	S	3394	S	0	3	2	stra_fore	stra_hind	1.18	8.18535			633	11	17	gang	gang	S	3299	S	0	3	1	stra_fore	stra_hind	1.16	4.12311				633	2
634	4	0.0100072	U0	ULO	L	c	0	2	4	outer_fore	1.24		634	2	70	gang	gang1	S	3395	S	0	3	2	stra_fore	stra_hind	1.21	8.3666			634	11	20	gang	gang	S	3300	S	0	3	1	stra_fore	stra_hind	1.23	4.47214				634	2
635	5	0.00904901	U0	ULO	L	c	0	4	5	outer_fore	1.42		635	2	87	gang	gang1	S	3396	S	0	3	2	stra_fore	stra_hind	1.4	9.32738			635	11	12	gang	gang	S	3301	S	0	3	1	stra_fore	stra_hind	1.23	3.4641				635	2
636	5	0.017626	U0	ULO	L	c	0	4	5	outer_fore	1.47		636	2	82	gang	gang1	S	3397	S	0	3	2	stra_fore	stra_hind	1.44	9.05539			636	12	17	gang	gang	S	3302	S	0	1	8	stra_fore	stra_hind	1.11	4.12311				636	2
637	5	0.0123205	U0	ULO	L	c	0	4	5	outer_fore	1.34		637	2	68	gang	gang1	S	3398	S	0	3	2	stra_fore	stra_hind	1.32	8.24621			637	12	27	gang	gang	S	3303	S	0	1	8	stra_fore	stra_hind	1.15	5.19615				637	2
638	5	0.0126918	U0	ULO	L	c	0	4	5	outer_fore	1.39		638	3	80	gang	gang1	S	3399	S	0	2	3	stra_fore	stra_hind	1.31	8.94427			638	12	28	gang	gang	S	3304	S	0	1	8	stra_fore	stra_hind	1.19	5.2915				638	3
639	7	0.0265696	U0	ULO	L	c	0	1	6	outer_fore	1.3		639	3	83	gang	gang1	S	3400	S	0	2	3	stra_fore	stra_hind	1.25	9.11043			639	12	26	gang	gang	S	3305	S	0	1	8	stra_fore	stra_hind	1.17	5.09902				639	3
640	7	0.0330238	U0	ULO	L	c	0	1	6	outer_fore	1.32		640	3	80	gang	gang1	S	3401	S	0	2	3	stra_fore	stra_hind	1.3	8.94427			640	12	23	gang	gang	S	3306	S	0	1	8	stra_fore	stra_hind	1.2	4.79583				640	3
641	7	0.021217	U0	ULO	L	c	0	1	6	outer_fore	1.36		641	3	79	gang	gang1	S	3402	S	0	2	3	stra_fore	stra_hind	1.29	8.88819			641	12	18	gang	gang	S	3307	S	0	1	8	stra_fore	stra_hind	1.07	4.24264				641	3
642	7	0.029105	U0	ULO	L	c	0	1	6	outer_fore	1.32		642	3	80	gang	gang1	S	3403	S	0	2	3	stra_fore	stra_hind	1.24	8.94427			642	12	27	gang	gang	S	3308	S	0	1	8	stra_fore	stra_hind	1.17	5.19615				642	3
643	7	0.0286556	U0	ULO	L	c	0	1	6	outer_fore	1.27		643	5	61	gang	gang1	S	3412	S	0	4	5	stra_fore	stra_hind	1.22	7.81025			643	12	23	gang	gang	S	3309	S	0	1	8	stra_fore	stra_hind	1.2	4.79583				643	5
644	7	0.0252009	U0	ULO	L	c	0	1	6	outer_fore	1.29		644	5	71	gang	gang1	S	3413	S	0	4	5	stra_fore	stra_hind	1.2	8.42615			644	12	21	gang	gang	S	3310	S	0	1	8	stra_fore	stra_hind	1.27	4.58258				644	5
645	7	0.0239423	U0	ULO	L	c	0	1	6	outer_fore	1.3		645	5	73	gang	gang1	S	3414	S	0	4	5	stra_fore	stra_hind	1.24	8.544			645	12	15	gang	gang	S	3311	S	0	1	8	stra_fore	stra_hind	1.28	3.87298				645	5
646	7	0.0232642	U0	ULO	L	c	0	1	6	outer_fore	1.29		646	5	61	gang	gang1	S	3415	S	0	4	5	stra_fore	stra_hind	1.25	7.81025			646	12	18	gang	gang	S	3312	S	0	1	8	stra_fore	stra_hind	1.25	4.24264				646	5
647	7	0.0236629	U0	ULO	L	c	0	1	6	outer_fore	1.31		647	5	61	gang	gang1	S	3416	S	0	4	5	stra_fore	stra_hind	1.24	7.81025			647	14	21	gang	gang	S	3324	S	0	1	9	stra_fore	stra_hind	1.24	4.58258				647	5
648	8	0.0204488	U0	ULO	L	c	0	5	5	outer_fore	1.24		648	5	63	gang	gang1	S	3417	S	0	4	5	stra_fore	stra_hind	1.22	7.93725			648	14	21	gang	gang	S	3325	S	0	1	9	stra_fore	stra_hind	1.21	4.58258				648	5
649	8	0.018209	U0	ULO	L	c	0	5	5	outer_fore	1.21		649	5	75	gang	gang1	S	3418	S	0	4	5	stra_fore	stra_hind	1.27	8.66025			649	14	20	gang	gang	S	3326	S	0	1	9	stra_fore	stra_hind	1.24	4.47214				649	5
650	8	0.0115387	U0	ULO	L	c	0	5	5	outer_fore	1.19		650	5	61	gang	gang1	S	3419	S	0	4	5	stra_fore	stra_hind	1.24	7.81025			650	14	21	gang	gang	S	3327	S	0	1	9	stra_fore	stra_hind	1.21	4.58258				650	5
651	8	0.0195339	U0	ULO	L	c	0	5	5	outer_fore	1.21		651	5	61	gang	gang1	S	3420	S	0	4	5	stra_fore	stra_hind	1.25	7.81025			651	14	24	gang	gang	S	3328	S	0	1	9	stra_fore	stra_hind	1.19	4.89898				651	5
652	8	0.0167148	U0	ULO	L	c	0	5	5	outer_fore	1.16		652	7	86	gang	gang1	S	3429	S	0	1	6	stra_fore	stra_hind	0.96	9.27362			652	14	17	gang	gang	S	3329	S	0	1	9	stra_fore	stra_hind	1.19	4.12311				652	7
653	8	0.0103219	U0	ULO	L	c	0	5	5	outer_fore	1.21		653	7	64	gang	gang1	S	3430	S	0	1	6	stra_fore	stra_hind	1.13	8			653	14	25	gang	gang	S	3330	S	0	1	9	stra_fore	stra_hind	1.23	5				653	7
654	8	0.0161488	U0	ULO	L	c	0	5	5	outer_fore	1.22		654	7	75	gang	gang1	S	3431	S	0	1	6	stra_fore	stra_hind	1.11	8.66025			654	14	24	gang	gang	S	3332	S	0	1	9	stra_fore	stra_hind	1.24	4.89898				654	7
655	8	0.0152368	U0	ULO	L	c	0	5	5	outer_fore	1.29		655	7	69	gang	gang1	S	3432	S	0	1	6	stra_fore	stra_hind	1.12	8.30662			655	14	22	gang	gang	S	3333	S	0	1	9	stra_fore	stra_hind	1.21	4.69042				655	7
656	8	0.0159916	U0	ULO	L	c	0	5	5	outer_fore	1.28		656	8	77	gang	gang1	S	3433	S	0	5	5	stra_fore	stra_hind	1.24	8.77496			656	15	29	gang	gang	S	3334	S	0	3	10	stra_fore	stra_hind	1.16	5.38516				656	8
657	8	0.0197291	U0	ULO	L	c	0	5	5	outer_fore	1.23		657	8	66	gang	gang1	S	3434	S	0	5	5	stra_fore	stra_hind	1.18	8.12404			657	15	29	gang	gang	S	3335	S	0	3	10	stra_fore	stra_hind	1.21	5.38516				657	8
658	8	0.0135805	U0	ULO	L	c	0	5	5	outer_fore	1.13		658	8	70	gang	gang1	S	3435	S	0	5	5	stra_fore	stra_hind	1.16	8.3666			658	15	27	gang	gang	S	3336	S	0	3	10	stra_fore	stra_hind	1.19	5.19615				658	8
659	8	0.0158268	U0	ULO	L	c	0	5	5	outer_fore	1.22		659	8	69	gang	gang1	S	3436	S	0	5	5	stra_fore	stra_hind	1.12	8.30662			659	15	28	gang	gang	S	3337	S	0	3	10	stra_fore	stra_hind	1.18	5.2915				659	8
660	8	0.0102028	U0	ULO	L	c	0	5	5	outer_fore	1.32		660	8	75	gang	gang1	S	3437	S	0	5	5	stra_fore	stra_hind	1.15	8.66025			660	15	30	gang	gang	S	3338	S	0	3	10	stra_fore	stra_hind	1.24	5.47723				660	8
661	8	0.0113098	U0	ULO	L	c	0	5	5	outer_fore	1.2		661	8	73	gang	gang1	S	3438	S	0	5	5	stra_fore	stra_hind	1.16	8.544			661	15	28	gang	gang	S	3339	S	0	3	10	stra_fore	stra_hind	1.28	5.2915				661	8
662	8	0.00745515	U0	ULO	L	c	0	5	5	outer_fore	1.25		662	8	74	gang	gang1	S	3439	S	0	5	5	stra_fore	stra_hind	1.23	8.60233			662	15	16	gang	gang	S	3340	S	0	3	10	stra_fore	stra_hind	1.18	4				662	8
663	8	0.0128395	U0	ULO	L	c	0	5	5	outer_fore	1.22		663	8	70	gang	gang1	S	3440	S	0	5	5	stra_fore	stra_hind	1.16	8.3666			663	15	23	gang	gang	S	3341	S	0	3	10	stra_fore	stra_hind	1.17	4.79583				663	8
664	8	0.0111605	U0	ULO	L	c	0	5	5	outer_fore	1.26		664	8	75	gang	gang1	S	3441	S	0	5	5	stra_fore	stra_hind	1.18	8.66025			664	15	24	gang	gang	S	3342	S	0	3	10	stra_fore	stra_hind	1.23	4.89898				664	8
665	8	0.00749123	U0	ULO	L	c	0	5	5	outer_fore	1.23		665	8	73	gang	gang1	S	3442	S	0	5	5	stra_fore	stra_hind	1.17	8.544			665	15	25	gang	gang	S	3343	S	0	3	10	stra_fore	stra_hind	1.23	5				665	8
666	8	0.0181477	U0	ULO	L	c	0	5	5	outer_fore	1.32		666	8	72	gang	gang1	S	3443	S	0	5	5	stra_fore	stra_hind	1.17	8.48528			666	15	22	gang	gang	S	3344	S	0	3	10	stra_fore	stra_hind	1.18	4.69042				666	8
667	8	0.0146611	U0	ULO	L	c	0	5	5	outer_fore	1.26		667	8	75	gang	gang1	S	3444	S	0	5	5	stra_fore	stra_hind	1.14	8.66025			667	15	27	gang	gang	S	3345	S	0	3	10	stra_fore	stra_hind	1.15	5.19615				667	8
668	8	0.0153671	U0	ULO	L	c	0	5	5	outer_fore	1.33		668	8	74	gang	gang1	S	3445	S	0	5	5	stra_fore	stra_hind	1.21	8.60233			668	15	29	gang	gang	S	3346	S	0	3	10	stra_fore	stra_hind	1.28	5.38516				668	8
669	8	0.0180199	U0	ULO	L	c	0	5	5	outer_fore	1.27		669	9	79	gang	gang1	S	3446	S	0	3	6	stra_fore	stra_hind	1.15	8.88819			669	15	13	gang	gang	S	3347	S	0	3	10	stra_fore	stra_hind	1.18	3.60555				669	9
670	8	0.0185169	U0	ULO	L	c	0	5	5	outer_fore	1.26		670	9	80	gang	gang1	S	3449	S	0	3	6	stra_fore	stra_hind	1.11	8.94427			670	17	17	gang	gang	S	3362	S	0	1	2	stra_fore	stra_hind	1.14	4.12311				670	9
671	8	0.0135995	U0	ULO	L	c	0	5	5	outer_fore	1.25		671	9	80	gang	gang1	S	3451	S	0	3	6	stra_fore	stra_hind	1.11	8.94427			671	17	17	gang	gang	S	3363	S	0	1	2	stra_fore	stra_hind	1.14	4.12311				671	9
672	8	0.0133544	U0	ULO	L	c	0	5	5	outer_fore	1.24		672	9	81	gang	gang1	S	3455	S	0	3	6	stra_fore	stra_hind	1.17	9			672	17	17	gang	gang	S	3364	S	0	1	2	stra_fore	stra_hind	1.13	4.12311				672	9
673	8	0.013805	U0	ULO	L	c	0	5	5	outer_fore	1.28		673	9	75	gang	gang1	S	3456	S	0	3	6	stra_fore	stra_hind	1.12	8.66025			673	17	18	gang	gang	S	3365	S	0	1	2	stra_fore	stra_hind	1.13	4.24264				673	9
674	8	0.0136971	U0	ULO	L	c	0	5	5	outer_fore	1.27		674	9	78	gang	gang1	S	3457	S	0	3	6	stra_fore	stra_hind	1.14	8.83176			674	17	18	gang	gang	S	3366	S	0	1	2	stra_fore	stra_hind	1.14	4.24264				674	9
675	8	0.00897945	U0	ULO	L	c	0	5	5	outer_fore	1.23		675	10	76	gang	gang1	S	3459	S	0	5	7	stra_fore	stra_hind	1.26	8.7178			675	17	14	gang	gang	S	3367	S	0	1	2	stra_fore	stra_hind	1.15	3.74166				675	10
676	8	0.0116123	U0	ULO	L	c	0	5	5	outer_fore	1.28		676	10	82	gang	gang1	S	3460	S	0	5	7	stra_fore	stra_hind	1.26	9.05539			676	17	17	gang	gang	S	3368	S	0	1	2	stra_fore	stra_hind	1.16	4.12311				676	10
677	8	0.0196657	U0	ULO	L	c	0	5	5	outer_fore	1.41		677	10	71	gang	gang1	S	3461	S	0	5	7	stra_fore	stra_hind	1.23	8.42615			677	17	19	gang	gang	S	3369	S	0	1	2	stra_fore	stra_hind	1.21	4.3589				677	10
678	8	0.0139021	U0	ULO	L	c	0	5	5	outer_fore	1.21		678	10	84	gang	gang1	S	3462	S	0	5	7	stra_fore	stra_hind	1.25	9.16515			678	17	17	gang	gang	S	3370	S	0	1	2	stra_fore	stra_hind	1.27	4.12311				678	10
679	8	0.0129837	U0	ULO	L	c	0	5	5	outer_fore	1.23		679	10	87	gang	gang1	S	3463	S	0	5	7	stra_fore	stra_hind	1.28	9.32738			679	17	13	gang	gang	S	3371	S	0	1	2	stra_fore	stra_hind	1.34	3.60555				679	10
680	8	0.0171027	U0	ULO	L	c	0	5	5	outer_fore	1.31		680	10	87	gang	gang1	S	3464	S	0	5	7	stra_fore	stra_hind	1.21	9.32738			680	17	20	gang	gang	S	3372	S	0	1	2	stra_fore	stra_hind	1.26	4.47214				680	10
681	9	0.0228649	U0	ULO	L	c	0	3	6	outer_fore	1.19		681	10	76	gang	gang1	S	3465	S	0	5	7	stra_fore	stra_hind	1.34	8.7178			681	1	30	gang	gang1	S	3385	S	0	1	1	stra_fore	stra_hind	0.96	5.47723				681	10
682	9	0.0224886	U0	ULO	L	c	0	3	6	outer_fore	1.21		682	10	72	gang	gang1	S	3466	S	0	5	7	stra_fore	stra_hind	1.3	8.48528			682	1	42	gang	gang1	S	3386	S	0	1	1	stra_fore	stra_hind	1.13	6.48074				682	10
683	9	0.0238557	U0	ULO	L	c	0	3	6	outer_fore	1.23		683	11	65	gang	gang1	S	3467	S	0	3	1	stra_fore	stra_hind	1.25	8.06226			683	1	34	gang	gang1	S	3387	S	0	1	1	stra_fore	stra_hind	1.11	5.83095				683	11
684	9	0.0254638	U0	ULO	L	c	0	3	6	outer_fore	1.15		684	11	77	gang	gang1	S	3468	S	0	3	1	stra_fore	stra_hind	1.17	8.77496			684	1	24	gang	gang1	S	3388	S	0	1	1	stra_fore	stra_hind	1.12	4.89898				684	11
685	9	0.0221798	U0	ULO	L	c	0	3	6	outer_fore	1.15		685	11	77	gang	gang1	S	3469	S	0	3	1	stra_fore	stra_hind	1.14	8.77496			685	2	21	gang	gang1	S	3389	S	0	3	2	stra_fore	stra_hind	1.14	4.58258				685	11
686	9	0.0309184	U0	ULO	L	c	0	3	6	outer_fore	1.15		686	11	80	gang	gang1	S	3470	S	0	3	1	stra_fore	stra_hind	1.18	8.94427			686	2	21	gang	gang1	S	3390	S	0	3	2	stra_fore	stra_hind	1.19	4.58258				686	11
687	9	0.0244666	U0	ULO	L	c	0	3	6	outer_fore	1.24		687	11	76	gang	gang1	S	3471	S	0	3	1	stra_fore	stra_hind	1.17	8.7178			687	2	17	gang	gang1	S	3391	S	0	3	2	stra_fore	stra_hind	1.17	4.12311				687	11
688	9	0.0188169	U0	ULO	L	c	0	3	6	outer_fore	1.14		688	11	76	gang	gang1	S	3472	S	0	3	1	stra_fore	stra_hind	1.12	8.7178			688	2	20	gang	gang1	S	3392	S	0	3	2	stra_fore	stra_hind	1.17	4.47214				688	11
689	9	0.0195131	U0	ULO	L	c	0	3	6	outer_fore	1.19		689	11	74	gang	gang1	S	3474	S	0	3	1	stra_fore	stra_hind	1.13	8.60233			689	2	18	gang	gang1	S	3393	S	0	3	2	stra_fore	stra_hind	1.16	4.24264				689	11
690	9	0.0148494	U0	ULO	L	c	0	3	6	outer_fore	1.25		690	11	73	gang	gang1	S	3475	S	0	3	1	stra_fore	stra_hind	1.17	8.544			690	2	18	gang	gang1	S	3394	S	0	3	2	stra_fore	stra_hind	1.18	4.24264				690	11
691	9	0.0185528	U0	ULO	L	c	0	3	6	outer_fore	1.26		691	11	72	gang	gang1	S	3476	S	0	3	1	stra_fore	stra_hind	1.16	8.48528			691	2	19	gang	gang1	S	3395	S	0	3	2	stra_fore	stra_hind	1.21	4.3589				691	11
692	9	0.017944	U0	ULO	L	c	0	3	6	outer_fore	1.16		692	11	79	gang	gang1	S	3477	S	0	3	1	stra_fore	stra_hind	1.18	8.88819			692	2	21	gang	gang1	S	3396	S	0	3	2	stra_fore	stra_hind	1.4	4.58258				692	11
693	9	0.0141385	U0	ULO	L	c	0	3	6	outer_fore	1.26		693	11	70	gang	gang1	S	3478	S	0	3	1	stra_fore	stra_hind	1.18	8.3666			693	2	23	gang	gang1	S	3397	S	0	3	2	stra_fore	stra_hind	1.44	4.79583				693	11
694	9	0.0255017	U0	ULO	L	c	0	3	6	outer_fore	1.23		694	12	73	gang	gang1	S	3479	S	0	1	8	stra_fore	stra_hind	1.02	8.544			694	2	16	gang	gang1	S	3398	S	0	3	2	stra_fore	stra_hind	1.32	4				694	12
695	10	0.0156953	U0	ULO	L	c	0	5	7	outer_fore	1.22		695	12	74	gang	gang1	S	3480	S	0	1	8	stra_fore	stra_hind	1.18	8.60233			695	3	28	gang	gang1	S	3399	S	0	2	3	stra_fore	stra_hind	1.31	5.2915				695	12
696	10	0.0119514	U0	ULO	L	c	0	5	7	outer_fore	1.4		696	12	69	gang	gang1	S	3481	S	0	1	8	stra_fore	stra_hind	1.15	8.30662			696	3	28	gang	gang1	S	3400	S	0	2	3	stra_fore	stra_hind	1.25	5.2915				696	12
697	10	0.0233947	U0	ULO	L	c	0	5	7	outer_fore	1.37		697	12	70	gang	gang1	S	3482	S	0	1	8	stra_fore	stra_hind	1.16	8.3666			697	3	28	gang	gang1	S	3401	S	0	2	3	stra_fore	stra_hind	1.3	5.2915				697	12
698	10	0.0204452	U0	ULO	L	c	0	5	7	outer_fore	1.36		698	12	74	gang	gang1	S	3483	S	0	1	8	stra_fore	stra_hind	1.19	8.60233			698	3	28	gang	gang1	S	3402	S	0	2	3	stra_fore	stra_hind	1.29	5.2915				698	12
699	10	0.0254455	U0	ULO	L	c	0	5	7	outer_fore	1.38		699	12	66	gang	gang1	S	3484	S	0	1	8	stra_fore	stra_hind	1.23	8.12404			699	3	25	gang	gang1	S	3403	S	0	2	3	stra_fore	stra_hind	1.24	5				699	12
700	10	0.0183736	U0	ULO	L	c	0	5	7	outer_fore	1.36		700	12	61	gang	gang1	S	3485	S	0	1	8	stra_fore	stra_hind	1.16	7.81025			700	5	14	gang	gang1	S	3412	S	0	4	5	stra_fore	stra_hind	1.22	3.74166				700	12
701	10	0.010731	U0	ULO	L	c	0	5	7	outer_fore	1.34		701	12	69	gang	gang1	S	3486	S	0	1	8	stra_fore	stra_hind	1.23	8.30662			701	5	16	gang	gang1	S	3413	S	0	4	5	stra_fore	stra_hind	1.2	4				701	12
702	10	0.0215373	U0	ULO	L	c	0	5	7	outer_fore	1.3		702	14	91	gang	gang1	S	3500	S	0	1	9	stra_fore	stra_hind	1.17	9.53939			702	5	15	gang	gang1	S	3414	S	0	4	5	stra_fore	stra_hind	1.24	3.87298				702	14
703	10	0.0213678	U0	ULO	L	c	0	5	7	outer_fore	1.24		703	14	83	gang	gang1	S	3506	S	0	1	9	stra_fore	stra_hind	1.21	9.11043			703	5	14	gang	gang1	S	3415	S	0	4	5	stra_fore	stra_hind	1.25	3.74166				703	14
704	10	0.0212507	U0	ULO	L	c	0	5	7	outer_fore	1.26		704	14	84	gang	gang1	S	3507	S	0	1	9	stra_fore	stra_hind	1.2	9.16515			704	5	18	gang	gang1	S	3416	S	0	4	5	stra_fore	stra_hind	1.24	4.24264				704	14
705	10	0.0155077	U0	ULO	L	c	0	5	7	outer_fore	1.26		705	15	86	gang	gang1	S	3512	S	0	3	10	stra_fore	stra_hind	1.2	9.27362			705	5	12	gang	gang1	S	3417	S	0	4	5	stra_fore	stra_hind	1.22	3.4641				705	15
706	10	0.0188645	U0	ULO	L	c	0	5	7	outer_fore	1.26		706	15	73	gang	gang1	S	3513	S	0	3	10	stra_fore	stra_hind	1.19	8.544			706	5	18	gang	gang1	S	3418	S	0	4	5	stra_fore	stra_hind	1.27	4.24264				706	15
707	10	0.0124882	U0	ULO	L	c	0	5	7	outer_fore	1.34		707	15	68	gang	gang1	S	3514	S	0	3	10	stra_fore	stra_hind	1.23	8.24621			707	5	16	gang	gang1	S	3419	S	0	4	5	stra_fore	stra_hind	1.24	4				707	15
708	10	0.020446	U0	ULO	L	c	0	5	7	outer_fore	1.34		708	15	77	gang	gang1	S	3515	S	0	3	10	stra_fore	stra_hind	1.16	8.77496			708	5	17	gang	gang1	S	3420	S	0	4	5	stra_fore	stra_hind	1.25	4.12311				708	15
709	10	0.010445	U0	ULO	L	c	0	5	7	outer_fore	1.38		709	15	81	gang	gang1	S	3516	S	0	3	10	stra_fore	stra_hind	1.18	9			709	7	30	gang	gang1	S	3429	S	0	1	6	stra_fore	stra_hind	0.96	5.47723				709	15
710	10	0.0127744	U0	ULO	L	c	0	5	7	outer_fore	1.4		710	15	71	gang	gang1	S	3517	S	0	3	10	stra_fore	stra_hind	1.17	8.42615			710	7	42	gang	gang1	S	3430	S	0	1	6	stra_fore	stra_hind	1.13	6.48074				710	15
711	10	0.0176163	U0	ULO	L	c	0	5	7	outer_fore	1.34		711	15	68	gang	gang1	S	3518	S	0	3	10	stra_fore	stra_hind	1.14	8.24621			711	7	34	gang	gang1	S	3431	S	0	1	6	stra_fore	stra_hind	1.11	5.83095				711	15
712	10	0.0144967	U0	ULO	L	c	0	5	7	outer_fore	1.3		712	15	75	gang	gang1	S	3519	S	0	3	10	stra_fore	stra_hind	1.17	8.66025			712	7	24	gang	gang1	S	3432	S	0	1	6	stra_fore	stra_hind	1.12	4.89898				712	15
713	10	0.0163288	U0	ULO	L	c	0	5	7	outer_fore	1.28		713	15	63	gang	gang1	S	3520	S	0	3	10	stra_fore	stra_hind	1.13	7.93725			713	8	19	gang	gang1	S	3433	S	0	5	5	stra_fore	stra_hind	1.24	4.3589				713	15
714	10	0.0227783	U0	ULO	L	c	0	5	7	outer_fore	1.24		714	15	80	gang	gang1	S	3521	S	0	3	10	stra_fore	stra_hind	1.19	8.94427			714	8	20	gang	gang1	S	3434	S	0	5	5	stra_fore	stra_hind	1.18	4.47214				714	15
715	10	0.0156843	U0	ULO	L	c	0	5	7	outer_fore	1.24		715	15	85	gang	gang1	S	3522	S	0	3	10	stra_fore	stra_hind	1.21	9.21954			715	8	17	gang	gang1	S	3437	S	0	5	5	stra_fore	stra_hind	1.15	4.12311				715	15
716	10	0.0236998	U0	ULO	L	c	0	5	7	outer_fore	1.22		716	15	84	gang	gang1	S	3523	S	0	3	10	stra_fore	stra_hind	1.23	9.16515			716	8	17	gang	gang1	S	3438	S	0	5	5	stra_fore	stra_hind	1.16	4.12311				716	15
717	10	0.014706	U0	ULO	L	c	0	5	7	outer_fore	1.29		717	17	67	gang	gang1	S	3539	S	0	1	2	stra_fore	stra_hind	1.21	8.18535			717	8	16	gang	gang1	S	3441	S	0	5	5	stra_fore	stra_hind	1.18	4				717	17
718	10	0.02599	U0	ULO	L	c	0	5	7	outer_fore	1.34		718	17	81	gang	gang1	S	3540	S	0	1	2	stra_fore	stra_hind	1.21	9			718	8	17	gang	gang1	S	3442	S	0	5	5	stra_fore	stra_hind	1.17	4.12311				718	17
719	10	0.0178746	U0	ULO	L	c	0	5	7	outer_fore	1.3		719	17	81	gang	gang1	S	3541	S	0	1	2	stra_fore	stra_hind	1.2	9			719	8	17	gang	gang1	S	3443	S	0	5	5	stra_fore	stra_hind	1.17	4.12311				719	17
720	10	0.00802667	U0	ULO	L	c	0	5	7	outer_fore	1.26		720	17	66	gang	gang1	S	3542	S	0	1	2	stra_fore	stra_hind	1.17	8.12404			720	8	17	gang	gang1	S	3444	S	0	5	5	stra_fore	stra_hind	1.14	4.12311				720	17
721	10	0.0143023	U0	ULO	L	c	0	5	7	outer_fore	1.34		721	17	78	gang	gang1	S	3543	S	0	1	2	stra_fore	stra_hind	1.18	8.83176			721	9	20	gang	gang1	S	3446	S	0	3	6	stra_fore	stra_hind	1.15	4.47214				721	17
722	10	0.0164753	U0	ULO	L	c	0	5	7	outer_fore	1.27		722	17	80	gang	gang1	S	3544	S	0	1	2	stra_fore	stra_hind	1.19	8.94427			722	9	17	gang	gang1	S	3449	S	0	3	6	stra_fore	stra_hind	1.11	4.12311				722	17
723	10	0.0113934	U0	ULO	L	c	0	5	7	outer_fore	1.33		723	17	65	gang	gang1	S	3545	S	0	1	2	stra_fore	stra_hind	1.22	8.06226			723	9	21	gang	gang1	S	3450	S	0	3	6	stra_fore	stra_hind	1.08	4.58258				723	17
724	11	0.0101194	U0	ULO	L	c	0	3	1	outer_fore	1.28		724	17	80	gang	gang1	S	3546	S	0	1	2	stra_fore	stra_hind	1.16	8.94427			724	9	20	gang	gang1	S	3451	S	0	3	6	stra_fore	stra_hind	1.11	4.47214				724	17
725	11	0.0110315	U0	ULO	L	c	0	3	1	outer_fore	1.22		725	17	90	gang	gang1	S	3547	S	0	1	2	stra_fore	stra_hind	1.35	9.48683			725	9	16	gang	gang1	S	3452	S	0	3	6	stra_fore	stra_hind	1.07	4				725	17
726	11	0.00906058	U0	ULO	L	c	0	3	1	outer_fore	1.16		726	17	66	gang	gang1	S	3548	S	0	1	2	stra_fore	stra_hind	1.25	8.12404			726	9	21	gang	gang1	S	3453	S	0	3	6	stra_fore	stra_hind	1.08	4.58258				726	17
727	11	0.0100713	U0	ULO	L	c	0	3	1	outer_fore	1.23		727	1	88	U0	ULO	L	1	c	0	1	1	outer_fore	outer_hind	1.33	9.38083			727	9	21	gang	gang1	S	3454	S	0	3	6	stra_fore	stra_hind	1.14	4.58258				727	1
728	11	0.0124497	U0	ULO	L	c	0	3	1	outer_fore	1.22		728	1	82	U0	ULO	L	7	c	0	1	1	outer_fore	outer_hind	1.29	9.05539			728	9	19	gang	gang1	S	3455	S	0	3	6	stra_fore	stra_hind	1.17	4.3589				728	1
729	11	0.010773	U0	ULO	L	c	0	3	1	outer_fore	1.26		729	1	86	U0	ULO	L	14	c	0	1	1	outer_fore	outer_hind	1.31	9.27362			729	9	19	gang	gang1	S	3456	S	0	3	6	stra_fore	stra_hind	1.12	4.3589				729	1
730	11	0.00799528	U0	ULO	L	c	0	3	1	outer_fore	1.22		730	2	87	U0	ULO	L	15	c	0	3	2	outer_fore	outer_hind	1.4	9.32738			730	9	19	gang	gang1	S	3457	S	0	3	6	stra_fore	stra_hind	1.14	4.3589				730	2
731	11	0.00717299	U0	ULO	L	c	0	3	1	outer_fore	1.3		731	2	81	U0	ULO	L	17	c	0	3	2	outer_fore	outer_hind	1.32	9			731	9	19	gang	gang1	S	3458	S	0	3	6	stra_fore	stra_hind	1.12	4.3589				731	2
732	12	0.0217004	U0	ULO	L	c	0	1	8	outer_fore	1.17		732	2	84	U0	ULO	L	18	c	0	3	2	outer_fore	outer_hind	1.38	9.16515			732	10	28	gang	gang1	S	3459	S	0	5	7	stra_fore	stra_hind	1.26	5.2915				732	2
733	12	0.0180976	U0	ULO	L	c	0	1	8	outer_fore	1.22		733	2	81	U0	ULO	L	19	c	0	3	2	outer_fore	outer_hind	1.5	9			733	10	20	gang	gang1	S	3460	S	0	5	7	stra_fore	stra_hind	1.26	4.47214				733	2
734	12	0.0227628	U0	ULO	L	c	0	1	8	outer_fore	1.2		734	2	83	U0	ULO	L	20	c	0	3	2	outer_fore	outer_hind	1.34	9.11043			734	10	25	gang	gang1	S	3461	S	0	5	7	stra_fore	stra_hind	1.23	5				734	2
735	12	0.0102239	U0	ULO	L	c	0	1	8	outer_fore	1.2		735	2	78	U0	ULO	L	21	c	0	3	2	outer_fore	outer_hind	1.28	8.83176			735	10	25	gang	gang1	S	3462	S	0	5	7	stra_fore	stra_hind	1.25	5				735	2
736	12	0.0215861	U0	ULO	L	c	0	1	8	outer_fore	1.2		736	3	74	U0	ULO	L	22	c	0	2	3	outer_fore	outer_hind	1.5	8.60233			736	10	26	gang	gang1	S	3463	S	0	5	7	stra_fore	stra_hind	1.28	5.09902				736	3
737	12	0.017693	U0	ULO	L	c	0	1	8	outer_fore	1.16		737	3	75	U0	ULO	L	23	c	0	2	3	outer_fore	outer_hind	1.55	8.66025			737	10	26	gang	gang1	S	3464	S	0	5	7	stra_fore	stra_hind	1.21	5.09902				737	3
738	12	0.0237269	U0	ULO	L	c	0	1	8	outer_fore	1.14		738	3	78	U0	ULO	L	25	c	0	2	3	outer_fore	outer_hind	1.56	8.83176			738	10	24	gang	gang1	S	3466	S	0	5	7	stra_fore	stra_hind	1.3	4.89898				738	3
739	14	0.0121186	U0	ULO	L	c	0	1	9	outer_fore	1.29		739	3	81	U0	ULO	L	28	c	0	2	3	outer_fore	outer_hind	1.47	9			739	11	20	gang	gang1	S	3467	S	0	3	1	stra_fore	stra_hind	1.25	4.47214				739	3
740	14	0.0133666	U0	ULO	L	c	0	1	9	outer_fore	1.23		740	3	81	U0	ULO	L	30	c	0	2	3	outer_fore	outer_hind	1.51	9			740	11	15	gang	gang1	S	3468	S	0	3	1	stra_fore	stra_hind	1.17	3.87298				740	3
741	14	0.0122561	U0	ULO	L	c	0	1	9	outer_fore	1.21		741	3	82	U0	ULO	L	31	c	0	2	3	outer_fore	outer_hind	1.53	9.05539			741	11	17	gang	gang1	S	3469	S	0	3	1	stra_fore	stra_hind	1.14	4.12311				741	3
742	14	0.0123247	U0	ULO	L	c	0	1	9	outer_fore	1.16		742	3	80	U0	ULO	L	33	c	0	2	3	outer_fore	outer_hind	1.42	8.94427			742	11	18	gang	gang1	S	3470	S	0	3	1	stra_fore	stra_hind	1.18	4.24264				742	3
743	14	0.0115004	U0	ULO	L	c	0	1	9	outer_fore	1.11		743	4	70	U0	ULO	L	34	c	0	2	4	outer_fore	outer_hind	1.21	8.3666			743	11	16	gang	gang1	S	3471	S	0	3	1	stra_fore	stra_hind	1.17	4				743	4
744	15	0.0255385	U0	ULO	L	c	0	3	10	outer_fore	1.17		744	4	75	U0	ULO	L	36	c	0	2	4	outer_fore	outer_hind	1.24	8.66025			744	11	14	gang	gang1	S	3472	S	0	3	1	stra_fore	stra_hind	1.12	3.74166				744	4
745	15	0.0215781	U0	ULO	L	c	0	3	10	outer_fore	1.16		745	5	69	U0	ULO	L	38	c	0	4	5	outer_fore	outer_hind	1.4	8.30662			745	11	21	gang	gang1	S	3473	S	0	3	1	stra_fore	stra_hind	1.12	4.58258				745	5
746	15	0.0186097	U0	ULO	L	c	0	3	10	outer_fore	1.15		746	5	73	U0	ULO	L	39	c	0	4	5	outer_fore	outer_hind	1.47	8.544			746	11	13	gang	gang1	S	3474	S	0	3	1	stra_fore	stra_hind	1.13	3.60555				746	5
747	15	0.0236826	U0	ULO	L	c	0	3	10	outer_fore	1.25		747	5	72	U0	ULO	L	40	c	0	4	5	outer_fore	outer_hind	1.42	8.48528			747	11	14	gang	gang1	S	3475	S	0	3	1	stra_fore	stra_hind	1.17	3.74166				747	5
748	15	0.0306831	U0	ULO	L	c	0	3	10	outer_fore	1.2		748	5	61	U0	ULO	L	41	c	0	4	5	outer_fore	outer_hind	1.46	7.81025			748	11	12	gang	gang1	S	3476	S	0	3	1	stra_fore	stra_hind	1.16	3.4641				748	5
749	15	0.0255713	U0	ULO	L	c	0	3	10	outer_fore	1.14		749	5	64	U0	ULO	L	42	c	0	4	5	outer_fore	outer_hind	1.41	8			749	11	11	gang	gang1	S	3477	S	0	3	1	stra_fore	stra_hind	1.18	3.31662				749	5
750	15	0.024159	U0	ULO	L	c	0	3	10	outer_fore	1.18		750	5	78	U0	ULO	L	44	c	0	4	5	outer_fore	outer_hind	1.47	8.83176			750	12	27	gang	gang1	S	3479	S	0	1	8	stra_fore	stra_hind	1.02	5.19615				750	5
751	15	0.0311221	U0	ULO	L	c	0	3	10	outer_fore	1.18		751	5	70	U0	ULO	L	45	c	0	4	5	outer_fore	outer_hind	1.34	8.3666			751	12	25	gang	gang1	S	3480	S	0	1	8	stra_fore	stra_hind	1.18	5				751	5
752	15	0.0303783	U0	ULO	L	c	0	3	10	outer_fore	1.2		752	5	76	U0	ULO	L	46	c	0	4	5	outer_fore	outer_hind	1.39	8.7178			752	12	24	gang	gang1	S	3481	S	0	1	8	stra_fore	stra_hind	1.15	4.89898				752	5
753	15	0.0305197	U0	ULO	L	c	0	3	10	outer_fore	1.1		753	7	81	U0	ULO	L	56	c	0	1	6	outer_fore	outer_hind	1.3	9			753	12	25	gang	gang1	S	3482	S	0	1	8	stra_fore	stra_hind	1.16	5				753	7
754	15	0.0333618	U0	ULO	L	c	0	3	10	outer_fore	1.08		754	7	82	U0	ULO	L	57	c	0	1	6	outer_fore	outer_hind	1.32	9.05539			754	12	25	gang	gang1	S	3483	S	0	1	8	stra_fore	stra_hind	1.19	5				754	7
755	15	0.0290481	U0	ULO	L	c	0	3	10	outer_fore	1.14		755	7	77	U0	ULO	L	58	c	0	1	6	outer_fore	outer_hind	1.36	8.77496			755	12	25	gang	gang1	S	3484	S	0	1	8	stra_fore	stra_hind	1.23	5				755	7
756	15	0.0259667	U0	ULO	L	c	0	3	10	outer_fore	1.19		756	7	76	U0	ULO	L	59	c	0	1	6	outer_fore	outer_hind	1.32	8.7178			756	12	16	gang	gang1	S	3485	S	0	1	8	stra_fore	stra_hind	1.16	4				756	7
757	15	0.0284506	U0	ULO	L	c	0	3	10	outer_fore	1.16		757	7	75	U0	ULO	L	60	c	0	1	6	outer_fore	outer_hind	1.27	8.66025			757	12	25	gang	gang1	S	3486	S	0	1	8	stra_fore	stra_hind	1.23	5				757	7
758	15	0.0289369	U0	ULO	L	c	0	3	10	outer_fore	1.17		758	7	79	U0	ULO	L	61	c	0	1	6	outer_fore	outer_hind	1.29	8.88819			758	14	21	gang	gang1	S	3500	S	0	1	9	stra_fore	stra_hind	1.17	4.58258				758	7
759	15	0.0391429	U0	ULO	L	c	0	3	10	outer_fore	1.16		759	7	77	U0	ULO	L	62	c	0	1	6	outer_fore	outer_hind	1.3	8.77496			759	14	26	gang	gang1	S	3504	S	0	1	9	stra_fore	stra_hind	1.19	5.09902				759	7
760	15	0.0236028	U0	ULO	L	c	0	3	10	outer_fore	1.16		760	7	77	U0	ULO	L	63	c	0	1	6	outer_fore	outer_hind	1.29	8.77496			760	14	21	gang	gang1	S	3505	S	0	1	9	stra_fore	stra_hind	1.2	4.58258				760	7
761	15	0.0324522	U0	ULO	L	c	0	3	10	outer_fore	1.16		761	7	78	U0	ULO	L	64	c	0	1	6	outer_fore	outer_hind	1.31	8.83176			761	14	19	gang	gang1	S	3506	S	0	1	9	stra_fore	stra_hind	1.21	4.3589				761	7
762	15	0.0199843	U0	ULO	L	c	0	3	10	outer_fore	1.16		762	8	77	U0	ULO	L	65	c	0	5	5	outer_fore	outer_hind	1.24	8.77496			762	14	23	gang	gang1	S	3507	S	0	1	9	stra_fore	stra_hind	1.2	4.79583				762	8
763	15	0.0298867	U0	ULO	L	c	0	3	10	outer_fore	1.22		763	8	73	U0	ULO	L	66	c	0	5	5	outer_fore	outer_hind	1.21	8.544			763	15	31	gang	gang1	S	3511	S	0	3	10	stra_fore	stra_hind	1.19	5.56776				763	8
764	15	0.0246903	U0	ULO	L	c	0	3	10	outer_fore	1.19		764	8	62	U0	ULO	L	67	c	0	5	5	outer_fore	outer_hind	1.19	7.87401			764	15	31	gang	gang1	S	3512	S	0	3	10	stra_fore	stra_hind	1.2	5.56776				764	8
765	15	0.0204054	U0	ULO	L	c	0	3	10	outer_fore	1.19		765	8	78	U0	ULO	L	68	c	0	5	5	outer_fore	outer_hind	1.21	8.83176			765	15	29	gang	gang1	S	3513	S	0	3	10	stra_fore	stra_hind	1.19	5.38516				765	8
766	15	0.0344414	U0	ULO	L	c	0	3	10	outer_fore	1.2		766	8	67	U0	ULO	L	69	c	0	5	5	outer_fore	outer_hind	1.16	8.18535			766	15	25	gang	gang1	S	3514	S	0	3	10	stra_fore	stra_hind	1.23	5				766	8
767	15	0.0307955	U0	ULO	L	c	0	3	10	outer_fore	1.18		767	8	65	U0	ULO	L	70	c	0	5	5	outer_fore	outer_hind	1.21	8.06226			767	15	20	gang	gang1	S	3515	S	0	3	10	stra_fore	stra_hind	1.16	4.47214				767	8
768	15	0.0373795	U0	ULO	L	c	0	3	10	outer_fore	1.2		768	8	81	U0	ULO	L	71	c	0	5	5	outer_fore	outer_hind	1.22	9			768	15	27	gang	gang1	S	3516	S	0	3	10	stra_fore	stra_hind	1.18	5.19615				768	8
769	17	0.0165995	U0	ULO	L	c	0	1	2	outer_fore	1.24		769	8	74	U0	ULO	L	72	c	0	5	5	outer_fore	outer_hind	1.29	8.60233			769	15	26	gang	gang1	S	3517	S	0	3	10	stra_fore	stra_hind	1.17	5.09902				769	8
770	17	0.0200147	U0	ULO	L	c	0	1	2	outer_fore	1.25		770	8	76	U0	ULO	L	73	c	0	5	5	outer_fore	outer_hind	1.28	8.7178			770	15	24	gang	gang1	S	3518	S	0	3	10	stra_fore	stra_hind	1.14	4.89898				770	8
771	17	0.0199191	U0	ULO	L	c	0	1	2	outer_fore	1.21		771	8	83	U0	ULO	L	74	c	0	5	5	outer_fore	outer_hind	1.23	9.11043			771	15	17	gang	gang1	S	3519	S	0	3	10	stra_fore	stra_hind	1.17	4.12311				771	8
772	17	0.0162064	U0	ULO	L	c	0	1	2	outer_fore	1.24		772	8	71	U0	ULO	L	75	c	0	5	5	outer_fore	outer_hind	1.13	8.42615			772	15	17	gang	gang1	S	3520	S	0	3	10	stra_fore	stra_hind	1.13	4.12311				772	8
773	17	0.0113226	U0	ULO	L	c	0	1	2	outer_fore	1.28		773	8	69	U0	ULO	L	76	c	0	5	5	outer_fore	outer_hind	1.22	8.30662			773	15	23	gang	gang1	S	3521	S	0	3	10	stra_fore	stra_hind	1.19	4.79583				773	8
774	17	0.0143162	U0	ULO	L	c	0	1	2	outer_fore	1.22		774	8	66	U0	ULO	L	77	c	0	5	5	outer_fore	outer_hind	1.32	8.12404			774	15	28	gang	gang1	S	3522	S	0	3	10	stra_fore	stra_hind	1.21	5.2915				774	8
775	17	0.0230043	U0	ULO	L	c	0	1	2	outer_fore	1.21		775	8	69	U0	ULO	L	78	c	0	5	5	outer_fore	outer_hind	1.2	8.30662			775	15	29	gang	gang1	S	3523	S	0	3	10	stra_fore	stra_hind	1.23	5.38516				775	8
776	17	0.015494	U0	ULO	L	c	0	1	2	outer_fore	1.29		776	8	61	U0	ULO	L	79	c	0	5	5	outer_fore	outer_hind	1.25	7.81025			776	17	21	gang	gang1	S	3539	S	0	1	2	stra_fore	stra_hind	1.21	4.58258				776	8
777	17	0.0109144	U0	ULO	L	c	0	1	2	outer_fore	1.23		777	8	65	U0	ULO	L	80	c	0	5	5	outer_fore	outer_hind	1.22	8.06226			777	17	18	gang	gang1	S	3540	S	0	1	2	stra_fore	stra_hind	1.21	4.24264				777	8
778	17	0.0110778	U0	ULO	L	c	0	1	2	outer_fore	1.28		778	8	66	U0	ULO	L	81	c	0	5	5	outer_fore	outer_hind	1.26	8.12404			778	17	20	gang	gang1	S	3541	S	0	1	2	stra_fore	stra_hind	1.2	4.47214				778	8
779	1	0.019383	U0	URO	R	c	0	1	1	inner_fore	1.33		779	8	83	U0	ULO	L	82	c	0	5	5	outer_fore	outer_hind	1.23	9.11043			779	17	18	gang	gang1	S	3542	S	0	1	2	stra_fore	stra_hind	1.17	4.24264				779	8
780	1	0.018233	U0	URO	R	c	0	1	1	inner_fore	1.35		780	8	75	U0	ULO	L	83	c	0	5	5	outer_fore	outer_hind	1.32	8.66025			780	17	16	gang	gang1	S	3543	S	0	1	2	stra_fore	stra_hind	1.18	4				780	8
781	1	0.0190433	U0	URO	R	c	0	1	1	inner_fore	1.35		781	8	63	U0	ULO	L	84	c	0	5	5	outer_fore	outer_hind	1.26	7.93725			781	17	15	gang	gang1	S	3544	S	0	1	2	stra_fore	stra_hind	1.19	3.87298				781	8
782	1	0.0160849	U0	URO	R	c	0	1	1	inner_fore	1.34		782	8	66	U0	ULO	L	87	c	0	5	5	outer_fore	outer_hind	1.33	8.12404			782	17	15	gang	gang1	S	3545	S	0	1	2	stra_fore	stra_hind	1.22	3.87298				782	8
783	1	0.0179954	U0	URO	R	c	0	1	1	inner_fore	1.4		783	8	75	U0	ULO	L	88	c	0	5	5	outer_fore	outer_hind	1.27	8.66025			783	17	13	gang	gang1	S	3546	S	0	1	2	stra_fore	stra_hind	1.16	3.60555				783	8
784	1	0.0172211	U0	URO	R	c	0	1	1	inner_fore	1.39		784	8	79	U0	ULO	L	89	c	0	5	5	outer_fore	outer_hind	1.26	8.88819			784	17	29	gang	gang1	S	3547	S	0	1	2	stra_fore	stra_hind	1.35	5.38516				784	8
785	1	0.0165273	U0	URO	R	c	0	1	1	inner_fore	1.37		785	8	69	U0	ULO	L	90	c	0	5	5	outer_fore	outer_hind	1.25	8.30662			785	17	15	gang	gang1	S	3548	S	0	1	2	stra_fore	stra_hind	1.25	3.87298				785	8
786	1	0.0174666	U0	URO	R	c	0	1	1	inner_fore	1.37		786	8	67	U0	ULO	L	91	c	0	5	5	outer_fore	outer_hind	1.24	8.18535			786	1	31	U0	ULO	L	1	c	0	1	1	outer_fore	outer_hind	1.33	5.56776				786	8
787	2	0.0197029	U0	URO	R	c	0	3	2	inner_fore	1.34		787	8	71	U0	ULO	L	92	c	0	5	5	outer_fore	outer_hind	1.28	8.42615			787	1	31	U0	ULO	L	2	c	0	1	1	outer_fore	outer_hind	1.39	5.56776				787	8
788	2	0.0239407	U0	URO	R	c	0	3	2	inner_fore	1.29		788	8	67	U0	ULO	L	93	c	0	5	5	outer_fore	outer_hind	1.27	8.18535			788	1	29	U0	ULO	L	3	c	0	1	1	outer_fore	outer_hind	1.3	5.38516				788	8
789	2	0.0193066	U0	URO	R	c	0	3	2	inner_fore	1.39		789	8	81	U0	ULO	L	94	c	0	5	5	outer_fore	outer_hind	1.23	9			789	1	32	U0	ULO	L	4	c	0	1	1	outer_fore	outer_hind	1.34	5.65685				789	8
790	2	0.0178412	U0	URO	R	c	0	3	2	inner_fore	1.4		790	8	80	U0	ULO	L	95	c	0	5	5	outer_fore	outer_hind	1.28	8.94427			790	1	29	U0	ULO	L	5	c	0	1	1	outer_fore	outer_hind	1.34	5.38516				790	8
791	2	0.0194104	U0	URO	R	c	0	3	2	inner_fore	1.41		791	8	74	U0	ULO	L	97	c	0	5	5	outer_fore	outer_hind	1.41	8.60233			791	1	31	U0	ULO	L	6	c	0	1	1	outer_fore	outer_hind	1.34	5.56776				791	8
792	3	0.0218138	U0	URO	R	c	0	2	3	inner_fore	1.44		792	8	80	U0	ULO	L	98	c	0	5	5	outer_fore	outer_hind	1.21	8.94427			792	1	39	U0	ULO	L	7	c	0	1	1	outer_fore	outer_hind	1.29	6.245				792	8
793	3	0.0221574	U0	URO	R	c	0	2	3	inner_fore	1.43		793	8	67	U0	ULO	L	100	c	0	5	5	outer_fore	outer_hind	1.23	8.18535			793	1	42	U0	ULO	L	8	c	0	1	1	outer_fore	outer_hind	1.36	6.48074				793	8
794	3	0.0217574	U0	URO	R	c	0	2	3	inner_fore	1.49		794	8	72	U0	ULO	L	101	c	0	5	5	outer_fore	outer_hind	1.31	8.48528			794	1	36	U0	ULO	L	9	c	0	1	1	outer_fore	outer_hind	1.45	6				794	8
795	3	0.0164747	U0	URO	R	c	0	2	3	inner_fore	1.52		795	9	80	U0	ULO	L	102	c	0	3	6	outer_fore	outer_hind	1.19	8.94427			795	1	41	U0	ULO	L	10	c	0	1	1	outer_fore	outer_hind	1.31	6.40312				795	9
796	3	0.0210079	U0	URO	R	c	0	2	3	inner_fore	1.51		796	9	86	U0	ULO	L	103	c	0	3	6	outer_fore	outer_hind	1.21	9.27362			796	1	35	U0	ULO	L	11	c	0	1	1	outer_fore	outer_hind	1.4	5.91608				796	9
797	3	0.0206326	U0	URO	R	c	0	2	3	inner_fore	1.46		797	9	80	U0	ULO	L	104	c	0	3	6	outer_fore	outer_hind	1.23	8.94427			797	1	30	U0	ULO	L	12	c	0	1	1	outer_fore	outer_hind	1.29	5.47723				797	9
798	3	0.0208145	U0	URO	R	c	0	2	3	inner_fore	1.52		798	9	85	U0	ULO	L	105	c	0	3	6	outer_fore	outer_hind	1.15	9.21954			798	1	31	U0	ULO	L	13	c	0	1	1	outer_fore	outer_hind	1.28	5.56776				798	9
799	4	0.0159993	U0	URO	R	c	0	2	4	inner_fore	1.33		799	9	84	U0	ULO	L	106	c	0	3	6	outer_fore	outer_hind	1.15	9.16515			799	1	31	U0	ULO	L	14	c	0	1	1	outer_fore	outer_hind	1.31	5.56776				799	9
800	4	0.0157067	U0	URO	R	c	0	2	4	inner_fore	1.27		800	9	82	U0	ULO	L	107	c	0	3	6	outer_fore	outer_hind	1.15	9.05539			800	2	26	U0	ULO	L	16	c	0	3	2	outer_fore	outer_hind	1.36	5.09902				800	9
801	4	0.010743	U0	URO	R	c	0	2	4	inner_fore	1.28		801	9	77	U0	ULO	L	109	c	0	3	6	outer_fore	outer_hind	1.24	8.77496			801	2	24	U0	ULO	L	17	c	0	3	2	outer_fore	outer_hind	1.32	4.89898				801	9
802	4	0.0176268	U0	URO	R	c	0	2	4	inner_fore	1.39		802	9	87	U0	ULO	L	110	c	0	3	6	outer_fore	outer_hind	1.14	9.32738			802	2	25	U0	ULO	L	20	c	0	3	2	outer_fore	outer_hind	1.34	5				802	9
803	4	0.00594044	U0	URO	R	c	0	2	4	inner_fore	1.36		803	9	86	U0	ULO	L	111	c	0	3	6	outer_fore	outer_hind	1.19	9.27362			803	2	23	U0	ULO	L	21	c	0	3	2	outer_fore	outer_hind	1.28	4.79583				803	9
804	4	0.0119373	U0	URO	R	c	0	2	4	inner_fore	1.23		804	9	83	U0	ULO	L	112	c	0	3	6	outer_fore	outer_hind	1.25	9.11043			804	3	29	U0	ULO	L	22	c	0	2	3	outer_fore	outer_hind	1.5	5.38516				804	9
805	4	0.0139334	U0	URO	R	c	0	2	4	inner_fore	1.3		805	9	77	U0	ULO	L	113	c	0	3	6	outer_fore	outer_hind	1.26	8.77496			805	3	32	U0	ULO	L	27	c	0	2	3	outer_fore	outer_hind	1.48	5.65685				805	9
806	5	0.0108303	U0	URO	R	c	0	4	5	inner_fore	1.38		806	9	83	U0	ULO	L	114	c	0	3	6	outer_fore	outer_hind	1.16	9.11043			806	4	29	U0	ULO	L	34	c	0	2	4	outer_fore	outer_hind	1.21	5.38516				806	9
807	5	0.00627036	U0	URO	R	c	0	4	5	inner_fore	1.37		807	9	84	U0	ULO	L	115	c	0	3	6	outer_fore	outer_hind	1.26	9.16515			807	4	29	U0	ULO	L	35	c	0	2	4	outer_fore	outer_hind	1.27	5.38516				807	9
808	7	0.0276558	U0	URO	R	c	0	1	6	inner_fore	1.26		808	9	81	U0	ULO	L	116	c	0	3	6	outer_fore	outer_hind	1.23	9			808	4	23	U0	ULO	L	36	c	0	2	4	outer_fore	outer_hind	1.24	4.79583				808	9
809	7	0.0198637	U0	URO	R	c	0	1	6	inner_fore	1.27		809	10	71	U0	ULO	L	117	c	0	5	7	outer_fore	outer_hind	1.22	8.42615			809	5	28	U0	ULO	L	40	c	0	4	5	outer_fore	outer_hind	1.42	5.2915				809	10
810	7	0.0196278	U0	URO	R	c	0	1	6	inner_fore	1.25		810	10	75	U0	ULO	L	120	c	0	5	7	outer_fore	outer_hind	1.4	8.66025			810	5	31	U0	ULO	L	44	c	0	4	5	outer_fore	outer_hind	1.47	5.56776				810	10
811	7	0.022414	U0	URO	R	c	0	1	6	inner_fore	1.24		811	10	76	U0	ULO	L	121	c	0	5	7	outer_fore	outer_hind	1.37	8.7178			811	5	28	U0	ULO	L	45	c	0	4	5	outer_fore	outer_hind	1.34	5.2915				811	10
812	7	0.0230448	U0	URO	R	c	0	1	6	inner_fore	1.25		812	10	73	U0	ULO	L	122	c	0	5	7	outer_fore	outer_hind	1.43	8.544			812	5	27	U0	ULO	L	46	c	0	4	5	outer_fore	outer_hind	1.39	5.19615				812	10
813	7	0.015684	U0	URO	R	c	0	1	6	inner_fore	1.27		813	10	73	U0	ULO	L	123	c	0	5	7	outer_fore	outer_hind	1.36	8.544			813	7	26	U0	ULO	L	56	c	0	1	6	outer_fore	outer_hind	1.3	5.09902				813	10
814	7	0.0195943	U0	URO	R	c	0	1	6	inner_fore	1.28		814	10	75	U0	ULO	L	124	c	0	5	7	outer_fore	outer_hind	1.38	8.66025			814	7	25	U0	ULO	L	57	c	0	1	6	outer_fore	outer_hind	1.32	5				814	10
815	8	0.018234	U0	URO	R	c	0	5	5	inner_fore	1.11		815	10	71	U0	ULO	L	125	c	0	5	7	outer_fore	outer_hind	1.36	8.42615			815	7	20	U0	ULO	L	58	c	0	1	6	outer_fore	outer_hind	1.36	4.47214				815	10
816	8	0.0167387	U0	URO	R	c	0	5	5	inner_fore	1.22		816	10	77	U0	ULO	L	126	c	0	5	7	outer_fore	outer_hind	1.34	8.77496			816	7	16	U0	ULO	L	59	c	0	1	6	outer_fore	outer_hind	1.32	4				816	10
817	8	0.0115821	U0	URO	R	c	0	5	5	inner_fore	1.21		817	10	69	U0	ULO	L	129	c	0	5	7	outer_fore	outer_hind	1.3	8.30662			817	7	14	U0	ULO	L	60	c	0	1	6	outer_fore	outer_hind	1.27	3.74166				817	10
818	8	0.0190485	U0	URO	R	c	0	5	5	inner_fore	1.18		818	10	67	U0	ULO	L	132	c	0	5	7	outer_fore	outer_hind	1.24	8.18535			818	7	21	U0	ULO	L	61	c	0	1	6	outer_fore	outer_hind	1.29	4.58258				818	10
819	8	0.010974	U0	URO	R	c	0	5	5	inner_fore	1.21		819	10	69	U0	ULO	L	133	c	0	5	7	outer_fore	outer_hind	1.26	8.30662			819	7	21	U0	ULO	L	62	c	0	1	6	outer_fore	outer_hind	1.3	4.58258				819	10
820	8	0.0162201	U0	URO	R	c	0	5	5	inner_fore	1.26		820	10	68	U0	ULO	L	134	c	0	5	7	outer_fore	outer_hind	1.26	8.24621			820	7	15	U0	ULO	L	63	c	0	1	6	outer_fore	outer_hind	1.29	3.87298				820	10
821	8	0.0177813	U0	URO	R	c	0	5	5	inner_fore	1.22		821	10	74	U0	ULO	L	135	c	0	5	7	outer_fore	outer_hind	1.26	8.60233			821	7	21	U0	ULO	L	64	c	0	1	6	outer_fore	outer_hind	1.31	4.58258				821	10
822	8	0.0176246	U0	URO	R	c	0	5	5	inner_fore	1.21		822	10	71	U0	ULO	L	136	c	0	5	7	outer_fore	outer_hind	1.34	8.42615			822	8	19	U0	ULO	L	65	c	0	5	5	outer_fore	outer_hind	1.24	4.3589				822	10
823	8	0.0129629	U0	URO	R	c	0	5	5	inner_fore	1.2		823	10	69	U0	ULO	L	137	c	0	5	7	outer_fore	outer_hind	1.34	8.30662			823	8	18	U0	ULO	L	66	c	0	5	5	outer_fore	outer_hind	1.21	4.24264				823	10
824	8	0.0148816	U0	URO	R	c	0	5	5	inner_fore	1.26		824	10	69	U0	ULO	L	138	c	0	5	7	outer_fore	outer_hind	1.38	8.30662			824	8	19	U0	ULO	L	67	c	0	5	5	outer_fore	outer_hind	1.19	4.3589				824	10
825	8	0.0179559	U0	URO	R	c	0	5	5	inner_fore	1.26		825	10	74	U0	ULO	L	139	c	0	5	7	outer_fore	outer_hind	1.4	8.60233			825	8	22	U0	ULO	L	68	c	0	5	5	outer_fore	outer_hind	1.21	4.69042				825	10
826	8	0.0189132	U0	URO	R	c	0	5	5	inner_fore	1.28		826	10	70	U0	ULO	L	141	c	0	5	7	outer_fore	outer_hind	1.42	8.3666			826	8	23	U0	ULO	L	69	c	0	5	5	outer_fore	outer_hind	1.16	4.79583				826	10
827	8	0.0173292	U0	URO	R	c	0	5	5	inner_fore	1.15		827	10	72	U0	ULO	L	142	c	0	5	7	outer_fore	outer_hind	1.34	8.48528			827	8	19	U0	ULO	L	70	c	0	5	5	outer_fore	outer_hind	1.21	4.3589				827	10
828	8	0.0181473	U0	URO	R	c	0	5	5	inner_fore	1.26		828	10	69	U0	ULO	L	143	c	0	5	7	outer_fore	outer_hind	1.3	8.30662			828	8	24	U0	ULO	L	71	c	0	5	5	outer_fore	outer_hind	1.22	4.89898				828	10
829	8	0.016111	U0	URO	R	c	0	5	5	inner_fore	1.3		829	10	68	U0	ULO	L	144	c	0	5	7	outer_fore	outer_hind	1.28	8.24621			829	8	21	U0	ULO	L	72	c	0	5	5	outer_fore	outer_hind	1.29	4.58258				829	10
830	9	0.0184577	U0	URO	R	c	0	3	6	inner_fore	1.25		830	10	74	U0	ULO	L	145	c	0	5	7	outer_fore	outer_hind	1.24	8.60233			830	8	18	U0	ULO	L	73	c	0	5	5	outer_fore	outer_hind	1.28	4.24264				830	10
831	9	0.0275928	U0	URO	R	c	0	3	6	inner_fore	1.2		831	10	70	U0	ULO	L	148	c	0	5	7	outer_fore	outer_hind	1.24	8.3666			831	8	21	U0	ULO	L	74	c	0	5	5	outer_fore	outer_hind	1.23	4.58258				831	10
832	9	0.0242299	U0	URO	R	c	0	3	6	inner_fore	1.17		832	10	63	U0	ULO	L	150	c	0	5	7	outer_fore	outer_hind	1.21	7.93725			832	8	23	U0	ULO	L	75	c	0	5	5	outer_fore	outer_hind	1.13	4.79583				832	10
833	9	0.0249877	U0	URO	R	c	0	3	6	inner_fore	1.22		833	10	68	U0	ULO	L	151	c	0	5	7	outer_fore	outer_hind	1.22	8.24621			833	8	25	U0	ULO	L	76	c	0	5	5	outer_fore	outer_hind	1.22	5				833	10
834	9	0.0194366	U0	URO	R	c	0	3	6	inner_fore	1.22		834	10	70	U0	ULO	L	154	c	0	5	7	outer_fore	outer_hind	1.29	8.3666			834	8	21	U0	ULO	L	77	c	0	5	5	outer_fore	outer_hind	1.32	4.58258				834	10
835	9	0.0154812	U0	URO	R	c	0	3	6	inner_fore	1.23		835	10	74	U0	ULO	L	155	c	0	5	7	outer_fore	outer_hind	1.34	8.60233			835	8	19	U0	ULO	L	78	c	0	5	5	outer_fore	outer_hind	1.2	4.3589				835	10
836	9	0.0223877	U0	URO	R	c	0	3	6	inner_fore	1.19		836	10	71	U0	ULO	L	156	c	0	5	7	outer_fore	outer_hind	1.3	8.42615			836	8	25	U0	ULO	L	79	c	0	5	5	outer_fore	outer_hind	1.25	5				836	10
837	9	0.0302771	U0	URO	R	c	0	3	6	inner_fore	1.19		837	10	72	U0	ULO	L	157	c	0	5	7	outer_fore	outer_hind	1.26	8.48528			837	8	21	U0	ULO	L	80	c	0	5	5	outer_fore	outer_hind	1.22	4.58258				837	10
838	9	0.0242589	U0	URO	R	c	0	3	6	inner_fore	1.16		838	10	74	U0	ULO	L	159	c	0	5	7	outer_fore	outer_hind	1.34	8.60233			838	8	24	U0	ULO	L	81	c	0	5	5	outer_fore	outer_hind	1.26	4.89898				838	10
839	9	0.0256966	U0	URO	R	c	0	3	6	inner_fore	1.17		839	10	68	U0	ULO	L	161	c	0	5	7	outer_fore	outer_hind	1.37	8.24621			839	8	24	U0	ULO	L	82	c	0	5	5	outer_fore	outer_hind	1.23	4.89898				839	10
840	9	0.0172233	U0	URO	R	c	0	3	6	inner_fore	1.22		840	10	74	U0	ULO	L	162	c	0	5	7	outer_fore	outer_hind	1.27	8.60233			840	8	21	U0	ULO	L	83	c	0	5	5	outer_fore	outer_hind	1.32	4.58258				840	10
841	9	0.0193737	U0	URO	R	c	0	3	6	inner_fore	1.22		841	10	67	U0	ULO	L	163	c	0	5	7	outer_fore	outer_hind	1.33	8.18535			841	8	20	U0	ULO	L	84	c	0	5	5	outer_fore	outer_hind	1.26	4.47214				841	10
842	9	0.0227788	U0	URO	R	c	0	3	6	inner_fore	1.21		842	11	81	U0	ULO	L	167	c	0	3	1	outer_fore	outer_hind	1.28	9			842	8	11	U0	ULO	L	87	c	0	5	5	outer_fore	outer_hind	1.33	3.31662				842	11
843	9	0.0182774	U0	URO	R	c	0	3	6	inner_fore	1.17		843	11	82	U0	ULO	L	171	c	0	3	1	outer_fore	outer_hind	1.22	9.05539			843	8	21	U0	ULO	L	88	c	0	5	5	outer_fore	outer_hind	1.27	4.58258				843	11
844	9	0.0227283	U0	URO	R	c	0	3	6	inner_fore	1.21		844	11	89	U0	ULO	L	173	c	0	3	1	outer_fore	outer_hind	1.16	9.43398			844	8	22	U0	ULO	L	89	c	0	5	5	outer_fore	outer_hind	1.26	4.69042				844	11
845	9	0.0201333	U0	URO	R	c	0	3	6	inner_fore	1.21		845	11	83	U0	ULO	L	175	c	0	3	1	outer_fore	outer_hind	1.23	9.11043			845	8	19	U0	ULO	L	90	c	0	5	5	outer_fore	outer_hind	1.25	4.3589				845	11
846	9	0.0193995	U0	URO	R	c	0	3	6	inner_fore	1.23		846	11	80	U0	ULO	L	176	c	0	3	1	outer_fore	outer_hind	1.22	8.94427			846	8	19	U0	ULO	L	91	c	0	5	5	outer_fore	outer_hind	1.24	4.3589				846	11
847	9	0.0173813	U0	URO	R	c	0	3	6	inner_fore	1.2		847	11	79	U0	ULO	L	184	c	0	3	1	outer_fore	outer_hind	1.26	8.88819			847	8	24	U0	ULO	L	92	c	0	5	5	outer_fore	outer_hind	1.28	4.89898				847	11
848	9	0.0109096	U0	URO	R	c	0	3	6	inner_fore	1.25		848	11	80	U0	ULO	L	185	c	0	3	1	outer_fore	outer_hind	1.22	8.94427			848	8	21	U0	ULO	L	93	c	0	5	5	outer_fore	outer_hind	1.27	4.58258				848	11
849	9	0.0184679	U0	URO	R	c	0	3	6	inner_fore	1.25		849	11	78	U0	ULO	L	187	c	0	3	1	outer_fore	outer_hind	1.3	8.83176			849	8	18	U0	ULO	L	94	c	0	5	5	outer_fore	outer_hind	1.23	4.24264				849	11
850	9	0.0233063	U0	URO	R	c	0	3	6	inner_fore	1.2		850	12	65	U0	ULO	L	190	c	0	1	8	outer_fore	outer_hind	1.17	8.06226			850	8	26	U0	ULO	L	95	c	0	5	5	outer_fore	outer_hind	1.28	5.09902				850	12
851	9	0.0223891	U0	URO	R	c	0	3	6	inner_fore	1.15		851	12	61	U0	ULO	L	192	c	0	1	8	outer_fore	outer_hind	1.22	7.81025			851	8	27	U0	ULO	L	96	c	0	5	5	outer_fore	outer_hind	1.25	5.19615				851	12
852	10	0.0139942	U0	URO	R	c	0	5	7	inner_fore	1.36		852	12	64	U0	ULO	L	193	c	0	1	8	outer_fore	outer_hind	1.2	8			852	8	19	U0	ULO	L	97	c	0	5	5	outer_fore	outer_hind	1.41	4.3589				852	12
853	10	0.0188132	U0	URO	R	c	0	5	7	inner_fore	1.32		853	12	61	U0	ULO	L	196	c	0	1	8	outer_fore	outer_hind	1.2	7.81025			853	8	14	U0	ULO	L	98	c	0	5	5	outer_fore	outer_hind	1.21	3.74166				853	12
854	10	0.0139631	U0	URO	R	c	0	5	7	inner_fore	1.32		854	12	78	U0	ULO	L	197	c	0	1	8	outer_fore	outer_hind	1.2	8.83176			854	8	26	U0	ULO	L	99	c	0	5	5	outer_fore	outer_hind	1.09	5.09902				854	12
855	10	0.0181759	U0	URO	R	c	0	5	7	inner_fore	1.34		855	12	62	U0	ULO	L	198	c	0	1	8	outer_fore	outer_hind	1.16	7.87401			855	8	22	U0	ULO	L	100	c	0	5	5	outer_fore	outer_hind	1.23	4.69042				855	12
856	10	0.0139715	U0	URO	R	c	0	5	7	inner_fore	1.35		856	12	62	U0	ULO	L	199	c	0	1	8	outer_fore	outer_hind	1.14	7.87401			856	8	18	U0	ULO	L	101	c	0	5	5	outer_fore	outer_hind	1.31	4.24264				856	12
857	10	0.0158166	U0	URO	R	c	0	5	7	inner_fore	1.35		857	14	79	U0	ULO	L	231	c	0	1	9	outer_fore	outer_hind	1.29	8.88819			857	9	24	U0	ULO	L	102	c	0	3	6	outer_fore	outer_hind	1.19	4.89898				857	14
858	10	0.0157898	U0	URO	R	c	0	5	7	inner_fore	1.36		858	14	83	U0	ULO	L	232	c	0	1	9	outer_fore	outer_hind	1.23	9.11043			858	9	23	U0	ULO	L	103	c	0	3	6	outer_fore	outer_hind	1.21	4.79583				858	14
859	10	0.0152034	U0	URO	R	c	0	5	7	inner_fore	1.37		859	14	86	U0	ULO	L	233	c	0	1	9	outer_fore	outer_hind	1.24	9.27362			859	9	24	U0	ULO	L	104	c	0	3	6	outer_fore	outer_hind	1.23	4.89898				859	14
860	10	0.0095845	U0	URO	R	c	0	5	7	inner_fore	1.35		860	14	88	U0	ULO	L	234	c	0	1	9	outer_fore	outer_hind	1.21	9.38083			860	9	25	U0	ULO	L	105	c	0	3	6	outer_fore	outer_hind	1.15	5				860	14
861	10	0.0247523	U0	URO	R	c	0	5	7	inner_fore	1.5		861	14	88	U0	ULO	L	235	c	0	1	9	outer_fore	outer_hind	1.16	9.38083			861	9	22	U0	ULO	L	106	c	0	3	6	outer_fore	outer_hind	1.15	4.69042				861	14
862	10	0.014458	U0	URO	R	c	0	5	7	inner_fore	1.44		862	14	93	U0	ULO	L	238	c	0	1	9	outer_fore	outer_hind	1.11	9.64365			862	9	23	U0	ULO	L	107	c	0	3	6	outer_fore	outer_hind	1.15	4.79583				862	14
863	10	0.0150594	U0	URO	R	c	0	5	7	inner_fore	1.38		863	15	62	U0	ULO	L	240	c	0	3	10	outer_fore	outer_hind	1.17	7.87401			863	9	26	U0	ULO	L	108	c	0	3	6	outer_fore	outer_hind	1.17	5.09902				863	15
864	10	0.00898748	U0	URO	R	c	0	5	7	inner_fore	1.35		864	15	61	U0	ULO	L	241	c	0	3	10	outer_fore	outer_hind	1.16	7.81025			864	9	18	U0	ULO	L	109	c	0	3	6	outer_fore	outer_hind	1.24	4.24264				864	15
865	10	0.0174608	U0	URO	R	c	0	5	7	inner_fore	1.4		865	15	68	U0	ULO	L	242	c	0	3	10	outer_fore	outer_hind	1.15	8.24621			865	9	23	U0	ULO	L	110	c	0	3	6	outer_fore	outer_hind	1.14	4.79583				865	15
866	11	0.00456787	U0	URO	R	c	0	3	1	inner_fore	1.31		866	15	69	U0	ULO	L	243	c	0	3	10	outer_fore	outer_hind	1.25	8.30662			866	9	27	U0	ULO	L	111	c	0	3	6	outer_fore	outer_hind	1.19	5.19615				866	15
867	11	0.00788772	U0	URO	R	c	0	3	1	inner_fore	1.29		867	15	68	U0	ULO	L	244	c	0	3	10	outer_fore	outer_hind	1.2	8.24621			867	9	25	U0	ULO	L	112	c	0	3	6	outer_fore	outer_hind	1.25	5				867	15
868	11	0.00954891	U0	URO	R	c	0	3	1	inner_fore	1.29		868	15	67	U0	ULO	L	245	c	0	3	10	outer_fore	outer_hind	1.14	8.18535			868	9	20	U0	ULO	L	113	c	0	3	6	outer_fore	outer_hind	1.26	4.47214				868	15
869	11	0.0111006	U0	URO	R	c	0	3	1	inner_fore	1.3		869	15	67	U0	ULO	L	246	c	0	3	10	outer_fore	outer_hind	1.18	8.18535			869	9	25	U0	ULO	L	114	c	0	3	6	outer_fore	outer_hind	1.16	5				869	15
870	11	0.00623551	U0	URO	R	c	0	3	1	inner_fore	1.35		870	15	66	U0	ULO	L	247	c	0	3	10	outer_fore	outer_hind	1.18	8.12404			870	9	26	U0	ULO	L	115	c	0	3	6	outer_fore	outer_hind	1.26	5.09902				870	15
871	11	0.00790677	U0	URO	R	c	0	3	1	inner_fore	1.32		871	15	66	U0	ULO	L	248	c	0	3	10	outer_fore	outer_hind	1.2	8.12404			871	9	21	U0	ULO	L	116	c	0	3	6	outer_fore	outer_hind	1.23	4.58258				871	15
872	11	0.0110967	U0	URO	R	c	0	3	1	inner_fore	1.23		872	15	61	U0	ULO	L	249	c	0	3	10	outer_fore	outer_hind	1.1	7.81025			872	10	27	U0	ULO	L	117	c	0	5	7	outer_fore	outer_hind	1.22	5.19615				872	15
873	11	0.0140824	U0	URO	R	c	0	3	1	inner_fore	1.2		873	15	64	U0	ULO	L	250	c	0	3	10	outer_fore	outer_hind	1.08	8			873	10	27	U0	ULO	L	118	c	0	5	7	outer_fore	outer_hind	1.3	5.19615				873	15
874	11	0.0128452	U0	URO	R	c	0	3	1	inner_fore	1.22		874	15	67	U0	ULO	L	251	c	0	3	10	outer_fore	outer_hind	1.14	8.18535			874	10	30	U0	ULO	L	120	c	0	5	7	outer_fore	outer_hind	1.4	5.47723				874	15
875	12	0.0279805	U0	URO	R	c	0	1	8	inner_fore	1.17		875	15	65	U0	ULO	L	252	c	0	3	10	outer_fore	outer_hind	1.19	8.06226			875	10	31	U0	ULO	L	121	c	0	5	7	outer_fore	outer_hind	1.37	5.56776				875	15
876	12	0.018486	U0	URO	R	c	0	1	8	inner_fore	1.15		876	15	70	U0	ULO	L	253	c	0	3	10	outer_fore	outer_hind	1.16	8.3666			876	10	35	U0	ULO	L	123	c	0	5	7	outer_fore	outer_hind	1.36	5.91608				876	15
877	12	0.0206927	U0	URO	R	c	0	1	8	inner_fore	1.2		877	15	70	U0	ULO	L	254	c	0	3	10	outer_fore	outer_hind	1.17	8.3666			877	10	34	U0	ULO	L	124	c	0	5	7	outer_fore	outer_hind	1.38	5.83095				877	15
878	12	0.0200563	U0	URO	R	c	0	1	8	inner_fore	1.19		878	15	73	U0	ULO	L	255	c	0	3	10	outer_fore	outer_hind	1.16	8.544			878	10	31	U0	ULO	L	125	c	0	5	7	outer_fore	outer_hind	1.36	5.56776				878	15
879	12	0.0234681	U0	URO	R	c	0	1	8	inner_fore	1.22		879	15	69	U0	ULO	L	256	c	0	3	10	outer_fore	outer_hind	1.16	8.30662			879	10	33	U0	ULO	L	126	c	0	5	7	outer_fore	outer_hind	1.34	5.74456				879	15
880	12	0.0305496	U0	URO	R	c	0	1	8	inner_fore	1.18		880	15	61	U0	ULO	L	257	c	0	3	10	outer_fore	outer_hind	1.16	7.81025			880	10	32	U0	ULO	L	127	c	0	5	7	outer_fore	outer_hind	1.34	5.65685				880	15
881	12	0.0201627	U0	URO	R	c	0	1	8	inner_fore	1.17		881	15	62	U0	ULO	L	258	c	0	3	10	outer_fore	outer_hind	1.16	7.87401			881	10	33	U0	ULO	L	129	c	0	5	7	outer_fore	outer_hind	1.3	5.74456				881	15
882	12	0.020856	U0	URO	R	c	0	1	8	inner_fore	1.19		882	15	64	U0	ULO	L	259	c	0	3	10	outer_fore	outer_hind	1.22	8			882	10	24	U0	ULO	L	130	c	0	5	7	outer_fore	outer_hind	1.22	4.89898				882	15
883	12	0.0209072	U0	URO	R	c	0	1	8	inner_fore	1.25		883	15	61	U0	ULO	L	260	c	0	3	10	outer_fore	outer_hind	1.19	7.81025			883	10	26	U0	ULO	L	131	c	0	5	7	outer_fore	outer_hind	1.22	5.09902				883	15
884	14	0.00787434	U0	URO	R	c	0	1	9	inner_fore	1.25		884	15	66	U0	ULO	L	261	c	0	3	10	outer_fore	outer_hind	1.19	8.12404			884	10	23	U0	ULO	L	132	c	0	5	7	outer_fore	outer_hind	1.24	4.79583				884	15
885	15	0.0206532	U0	URO	R	c	0	3	10	inner_fore	1.16		885	15	68	U0	ULO	L	262	c	0	3	10	outer_fore	outer_hind	1.2	8.24621			885	10	25	U0	ULO	L	133	c	0	5	7	outer_fore	outer_hind	1.26	5				885	15
886	15	0.0319613	U0	URO	R	c	0	3	10	inner_fore	1.2		886	15	69	U0	ULO	L	263	c	0	3	10	outer_fore	outer_hind	1.18	8.30662			886	10	28	U0	ULO	L	134	c	0	5	7	outer_fore	outer_hind	1.26	5.2915				886	15
887	15	0.0310368	U0	URO	R	c	0	3	10	inner_fore	1.14		887	15	64	U0	ULO	L	264	c	0	3	10	outer_fore	outer_hind	1.2	8			887	10	32	U0	ULO	L	135	c	0	5	7	outer_fore	outer_hind	1.26	5.65685				887	15
888	15	0.0399592	U0	URO	R	c	0	3	10	inner_fore	1.14		888	17	79	U0	ULO	L	285	c	0	1	2	outer_fore	outer_hind	1.24	8.88819			888	10	28	U0	ULO	L	136	c	0	5	7	outer_fore	outer_hind	1.34	5.2915				888	17
889	15	0.0250862	U0	URO	R	c	0	3	10	inner_fore	1.16		889	17	74	U0	ULO	L	286	c	0	1	2	outer_fore	outer_hind	1.24	8.60233			889	10	27	U0	ULO	L	137	c	0	5	7	outer_fore	outer_hind	1.34	5.19615				889	17
890	15	0.018555	U0	URO	R	c	0	3	10	inner_fore	1.16		890	17	80	U0	ULO	L	287	c	0	1	2	outer_fore	outer_hind	1.25	8.94427			890	10	27	U0	ULO	L	138	c	0	5	7	outer_fore	outer_hind	1.38	5.19615				890	17
891	15	0.0332683	U0	URO	R	c	0	3	10	inner_fore	1.14		891	17	83	U0	ULO	L	288	c	0	1	2	outer_fore	outer_hind	1.21	9.11043			891	10	31	U0	ULO	L	139	c	0	5	7	outer_fore	outer_hind	1.4	5.56776				891	17
892	15	0.0271599	U0	URO	R	c	0	3	10	inner_fore	1.18		892	17	82	U0	ULO	L	290	c	0	1	2	outer_fore	outer_hind	1.25	9.05539			892	10	33	U0	ULO	L	142	c	0	5	7	outer_fore	outer_hind	1.34	5.74456				892	17
893	15	0.0323968	U0	URO	R	c	0	3	10	inner_fore	1.12		893	17	78	U0	ULO	L	292	c	0	1	2	outer_fore	outer_hind	1.24	8.83176			893	10	27	U0	ULO	L	143	c	0	5	7	outer_fore	outer_hind	1.3	5.19615				893	17
894	15	0.0242276	U0	URO	R	c	0	3	10	inner_fore	1.2		894	17	79	U0	ULO	L	293	c	0	1	2	outer_fore	outer_hind	1.28	8.88819			894	10	28	U0	ULO	L	144	c	0	5	7	outer_fore	outer_hind	1.28	5.2915				894	17
895	15	0.0225573	U0	URO	R	c	0	3	10	inner_fore	1.22		895	17	79	U0	ULO	L	297	c	0	1	2	outer_fore	outer_hind	1.22	8.88819			895	10	30	U0	ULO	L	145	c	0	5	7	outer_fore	outer_hind	1.24	5.47723				895	17
896	17	0.0136877	U0	URO	R	c	0	1	2	inner_fore	1.23		896	17	93	U0	ULO	L	299	c	0	1	2	outer_fore	outer_hind	1.21	9.64365			896	10	31	U0	ULO	L	146	c	0	5	7	outer_fore	outer_hind	1.22	5.56776				896	17
897	17	0.0114814	U0	URO	R	c	0	1	2	inner_fore	1.2		897	17	79	U0	ULO	L	302	c	0	1	2	outer_fore	outer_hind	1.29	8.88819			897	10	29	U0	ULO	L	147	c	0	5	7	outer_fore	outer_hind	1.28	5.38516				897	17
898	17	0.0133289	U0	URO	R	c	0	1	2	inner_fore	1.28		898	17	80	U0	ULO	L	303	c	0	1	2	outer_fore	outer_hind	1.23	8.94427			898	10	28	U0	ULO	L	148	c	0	5	7	outer_fore	outer_hind	1.24	5.2915				898	17
899	17	0.0195445	U0	URO	R	c	0	1	2	inner_fore	1.25		899	17	79	U0	ULO	L	304	c	0	1	2	outer_fore	outer_hind	1.28	8.88819			899	10	29	U0	ULO	L	149	c	0	5	7	outer_fore	outer_hind	1.23	5.38516				899	17
900	17	0.0199647	U0	URO	R	c	0	1	2	inner_fore	1.25		900	1	89	U0	URO	R	352	c	0	1	1	inner_fore	inner_hind	1.33	9.43398			900	10	24	U0	ULO	L	151	c	0	5	7	outer_fore	outer_hind	1.22	4.89898				900	1
901	17	0.0120792	U0	URO	R	c	0	1	2	inner_fore	1.26		901	1	89	U0	URO	R	353	c	0	1	1	inner_fore	inner_hind	1.35	9.43398			901	10	32	U0	ULO	L	152	c	0	5	7	outer_fore	outer_hind	1.26	5.65685				901	1
902	17	0.0153445	U0	URO	R	c	0	1	2	inner_fore	1.28		902	1	89	U0	URO	R	354	c	0	1	1	inner_fore	inner_hind	1.35	9.43398			902	10	30	U0	ULO	L	154	c	0	5	7	outer_fore	outer_hind	1.29	5.47723				902	1
903	17	0.0147975	U0	URO	R	c	0	1	2	inner_fore	1.22		903	1	87	U0	URO	R	355	c	0	1	1	inner_fore	inner_hind	1.34	9.32738			903	10	31	U0	ULO	L	155	c	0	5	7	outer_fore	outer_hind	1.34	5.56776				903	1
904	17	0.0176706	U0	URO	R	c	0	1	2	inner_fore	1.18		904	1	91	U0	URO	R	358	c	0	1	1	inner_fore	inner_hind	1.4	9.53939			904	10	25	U0	ULO	L	156	c	0	5	7	outer_fore	outer_hind	1.3	5				904	1
905	2	0.0107122	R0	RLO	L	c	1	3	2	outer_fore	1.4		905	1	89	U0	URO	R	359	c	0	1	1	inner_fore	inner_hind	1.39	9.43398			905	10	32	U0	ULO	L	157	c	0	5	7	outer_fore	outer_hind	1.26	5.65685				905	1
906	2	0.00765043	R0	RLO	L	c	1	3	2	outer_fore	1.39		906	1	89	U0	URO	R	360	c	0	1	1	inner_fore	inner_hind	1.37	9.43398			906	10	31	U0	ULO	L	159	c	0	5	7	outer_fore	outer_hind	1.34	5.56776				906	1
907	2	0.00601803	R0	RLO	L	c	1	3	2	outer_fore	1.39		907	1	82	U0	URO	R	364	c	0	1	1	inner_fore	inner_hind	1.37	9.05539			907	10	31	U0	ULO	L	162	c	0	5	7	outer_fore	outer_hind	1.27	5.56776				907	1
908	3	0.0168081	R0	RLO	L	c	1	2	3	outer_fore	1.55		908	2	84	U0	URO	R	365	c	0	3	2	inner_fore	inner_hind	1.34	9.16515			908	10	27	U0	ULO	L	163	c	0	5	7	outer_fore	outer_hind	1.33	5.19615				908	2
909	7	0.0190302	R0	RLO	L	c	1	1	6	outer_fore	1.25		909	2	85	U0	URO	R	366	c	0	3	2	inner_fore	inner_hind	1.29	9.21954			909	11	23	U0	ULO	L	167	c	0	3	1	outer_fore	outer_hind	1.28	4.79583				909	2
910	7	0.0158937	R0	RLO	L	c	1	1	6	outer_fore	1.25		910	2	88	U0	URO	R	368	c	0	3	2	inner_fore	inner_hind	1.39	9.38083			910	11	27	U0	ULO	L	169	c	0	3	1	outer_fore	outer_hind	1.25	5.19615				910	2
911	7	0.0389205	R0	RLO	L	c	1	1	6	outer_fore	1.28		911	2	83	U0	URO	R	369	c	0	3	2	inner_fore	inner_hind	1.4	9.11043			911	11	31	U0	ULO	L	170	c	0	3	1	outer_fore	outer_hind	1.26	5.56776				911	2
912	8	0.00902977	R0	RLO	L	c	1	5	5	outer_fore	1.36		912	2	84	U0	URO	R	370	c	0	3	2	inner_fore	inner_hind	1.41	9.16515			912	11	24	U0	ULO	L	171	c	0	3	1	outer_fore	outer_hind	1.22	4.89898				912	2
913	8	0.00703299	R0	RLO	L	c	1	5	5	outer_fore	1.35		913	2	93	U0	URO	R	371	c	0	3	2	inner_fore	inner_hind	1.32	9.64365			913	11	26	U0	ULO	L	173	c	0	3	1	outer_fore	outer_hind	1.16	5.09902				913	2
914	8	0.0044671	R0	RLO	L	c	1	5	5	outer_fore	1.19		914	3	76	U0	URO	R	372	c	0	2	3	inner_fore	inner_hind	1.44	8.7178			914	11	31	U0	ULO	L	174	c	0	3	1	outer_fore	outer_hind	1.34	5.56776				914	3
915	8	0.00406033	R0	RLO	L	c	1	5	5	outer_fore	1.29		915	3	74	U0	URO	R	373	c	0	2	3	inner_fore	inner_hind	1.43	8.60233			915	11	28	U0	ULO	L	175	c	0	3	1	outer_fore	outer_hind	1.23	5.2915				915	3
916	8	0.00533637	R0	RLO	L	c	1	5	5	outer_fore	1.27		916	3	77	U0	URO	R	374	c	0	2	3	inner_fore	inner_hind	1.49	8.77496			916	11	27	U0	ULO	L	176	c	0	3	1	outer_fore	outer_hind	1.22	5.19615				916	3
917	8	0.00589586	R0	RLO	L	c	1	5	5	outer_fore	1.19		917	3	75	U0	URO	R	377	c	0	2	3	inner_fore	inner_hind	1.52	8.66025			917	11	27	U0	ULO	L	177	c	0	3	1	outer_fore	outer_hind	1.16	5.19615				917	3
918	8	0.00642917	R0	RLO	L	c	1	5	5	outer_fore	1.21		918	3	77	U0	URO	R	378	c	0	2	3	inner_fore	inner_hind	1.51	8.77496			918	11	20	U0	ULO	L	180	c	0	3	1	outer_fore	outer_hind	1.19	4.47214				918	3
919	8	0.00519646	R0	RLO	L	c	1	5	5	outer_fore	1.25		919	3	78	U0	URO	R	379	c	0	2	3	inner_fore	inner_hind	1.5	8.83176			919	11	22	U0	ULO	L	181	c	0	3	1	outer_fore	outer_hind	1.22	4.69042				919	3
920	8	0.00575707	R0	RLO	L	c	1	5	5	outer_fore	1.26		920	3	78	U0	URO	R	380	c	0	2	3	inner_fore	inner_hind	1.46	8.83176			920	11	21	U0	ULO	L	184	c	0	3	1	outer_fore	outer_hind	1.26	4.58258				920	3
921	8	0.00335529	R0	RLO	L	c	1	5	5	outer_fore	1.24		921	3	72	U0	URO	R	381	c	0	2	3	inner_fore	inner_hind	1.52	8.48528			921	11	21	U0	ULO	L	185	c	0	3	1	outer_fore	outer_hind	1.22	4.58258				921	3
922	8	0.0052808	R0	RLO	L	c	1	5	5	outer_fore	1.31		922	4	77	U0	URO	R	383	c	0	2	4	inner_fore	inner_hind	1.29	8.77496			922	11	22	U0	ULO	L	187	c	0	3	1	outer_fore	outer_hind	1.3	4.69042				922	4
923	9	0.0119448	R0	RLO	L	c	1	3	6	outer_fore	1.21		923	4	68	U0	URO	R	384	c	0	2	4	inner_fore	inner_hind	1.33	8.24621			923	11	19	U0	ULO	L	188	c	0	3	1	outer_fore	outer_hind	1.28	4.3589				923	4
924	9	0.0146816	R0	RLO	L	c	1	3	6	outer_fore	1.27		924	4	74	U0	URO	R	385	c	0	2	4	inner_fore	inner_hind	1.27	8.60233			924	12	28	U0	ULO	L	190	c	0	1	8	outer_fore	outer_hind	1.17	5.2915				924	4
925	9	0.0133804	R0	RLO	L	c	1	3	6	outer_fore	1.2		925	4	76	U0	URO	R	386	c	0	2	4	inner_fore	inner_hind	1.28	8.7178			925	12	27	U0	ULO	L	192	c	0	1	8	outer_fore	outer_hind	1.22	5.19615				925	4
926	9	0.0118974	R0	RLO	L	c	1	3	6	outer_fore	1.21		926	4	82	U0	URO	R	387	c	0	2	4	inner_fore	inner_hind	1.39	9.05539			926	12	28	U0	ULO	L	193	c	0	1	8	outer_fore	outer_hind	1.2	5.2915				926	4
927	9	0.0155834	R0	RLO	L	c	1	3	6	outer_fore	1.23		927	4	87	U0	URO	R	388	c	0	2	4	inner_fore	inner_hind	1.29	9.32738			927	12	25	U0	ULO	L	194	c	0	1	8	outer_fore	outer_hind	1.21	5				927	4
928	9	0.0123075	R0	RLO	L	c	1	3	6	outer_fore	1.25		928	4	85	U0	URO	R	389	c	0	2	4	inner_fore	inner_hind	1.36	9.21954			928	12	26	U0	ULO	L	196	c	0	1	8	outer_fore	outer_hind	1.2	5.09902				928	4
929	9	0.014897	R0	RLO	L	c	1	3	6	outer_fore	1.18		929	4	73	U0	URO	R	392	c	0	2	4	inner_fore	inner_hind	1.23	8.544			929	12	26	U0	ULO	L	197	c	0	1	8	outer_fore	outer_hind	1.2	5.09902				929	4
930	9	0.0133783	R0	RLO	L	c	1	3	6	outer_fore	1.19		930	4	84	U0	URO	R	394	c	0	2	4	inner_fore	inner_hind	1.3	9.16515			930	12	27	U0	ULO	L	198	c	0	1	8	outer_fore	outer_hind	1.16	5.19615				930	4
931	9	0.0145268	R0	RLO	L	c	1	3	6	outer_fore	1.22		931	5	81	U0	URO	R	395	c	0	4	5	inner_fore	inner_hind	1.38	9			931	12	25	U0	ULO	L	199	c	0	1	8	outer_fore	outer_hind	1.14	5				931	5
932	9	0.0122504	R0	RLO	L	c	1	3	6	outer_fore	1.24		932	5	82	U0	URO	R	396	c	0	4	5	inner_fore	inner_hind	1.37	9.05539			932	14	24	U0	ULO	L	231	c	0	1	9	outer_fore	outer_hind	1.29	4.89898				932	5
933	9	0.015833	R0	RLO	L	c	1	3	6	outer_fore	1.26		933	5	68	U0	URO	R	397	c	0	4	5	inner_fore	inner_hind	1.39	8.24621			933	14	24	U0	ULO	L	232	c	0	1	9	outer_fore	outer_hind	1.23	4.89898				933	5
934	9	0.0122732	R0	RLO	L	c	1	3	6	outer_fore	1.26		934	5	69	U0	URO	R	398	c	0	4	5	inner_fore	inner_hind	1.31	8.30662			934	14	26	U0	ULO	L	234	c	0	1	9	outer_fore	outer_hind	1.21	5.09902				934	5
935	9	0.00992103	R0	RLO	L	c	1	3	6	outer_fore	1.27		935	5	83	U0	URO	R	400	c	0	4	5	inner_fore	inner_hind	1.45	9.11043			935	14	25	U0	ULO	L	235	c	0	1	9	outer_fore	outer_hind	1.16	5				935	5
936	10	0.0174333	R0	RLO	L	c	1	5	7	outer_fore	1.19		936	5	69	U0	URO	R	401	c	0	4	5	inner_fore	inner_hind	1.47	8.30662			936	14	26	U0	ULO	L	236	c	0	1	9	outer_fore	outer_hind	1.1	5.09902				936	5
937	10	0.0152301	R0	RLO	L	c	1	5	7	outer_fore	1.36		937	5	76	U0	URO	R	402	c	0	4	5	inner_fore	inner_hind	1.37	8.7178			937	14	26	U0	ULO	L	237	c	0	1	9	outer_fore	outer_hind	1.09	5.09902				937	5
938	11	0.00390581	R0	RLO	L	c	1	3	1	outer_fore	1.33		938	5	75	U0	URO	R	403	c	0	4	5	inner_fore	inner_hind	1.44	8.66025			938	14	24	U0	ULO	L	238	c	0	1	9	outer_fore	outer_hind	1.11	4.89898				938	5
939	12	0.0247713	R0	RLO	L	c	1	1	8	outer_fore	1.1		939	5	73	U0	URO	R	404	c	0	4	5	inner_fore	inner_hind	1.48	8.544			939	15	17	U0	ULO	L	240	c	0	3	10	outer_fore	outer_hind	1.17	4.12311				939	5
940	12	0.025138	R0	RLO	L	c	1	1	8	outer_fore	1.09		940	5	77	U0	URO	R	407	c	0	4	5	inner_fore	inner_hind	1.42	8.77496			940	15	16	U0	ULO	L	241	c	0	3	10	outer_fore	outer_hind	1.16	4				940	5
941	12	0.0253956	R0	RLO	L	c	1	1	8	outer_fore	1.1		941	7	81	U0	URO	R	422	c	0	1	6	inner_fore	inner_hind	1.26	9			941	15	23	U0	ULO	L	242	c	0	3	10	outer_fore	outer_hind	1.15	4.79583				941	7
942	12	0.0196888	R0	RLO	L	c	1	1	8	outer_fore	1.09		942	7	82	U0	URO	R	423	c	0	1	6	inner_fore	inner_hind	1.27	9.05539			942	15	23	U0	ULO	L	243	c	0	3	10	outer_fore	outer_hind	1.25	4.79583				942	7
943	12	0.0219424	R0	RLO	L	c	1	1	8	outer_fore	1.11		943	7	82	U0	URO	R	424	c	0	1	6	inner_fore	inner_hind	1.25	9.05539			943	15	21	U0	ULO	L	244	c	0	3	10	outer_fore	outer_hind	1.2	4.58258				943	7
944	15	0.0129891	R0	RLO	L	c	1	3	10	outer_fore	1.13		944	7	81	U0	URO	R	425	c	0	1	6	inner_fore	inner_hind	1.24	9			944	15	18	U0	ULO	L	245	c	0	3	10	outer_fore	outer_hind	1.14	4.24264				944	7
945	15	0.0151843	R0	RLO	L	c	1	3	10	outer_fore	1.2		945	7	81	U0	URO	R	426	c	0	1	6	inner_fore	inner_hind	1.25	9			945	15	16	U0	ULO	L	246	c	0	3	10	outer_fore	outer_hind	1.18	4				945	7
946	17	0.0123151	R0	RLO	L	c	1	1	2	outer_fore	1.17		946	7	80	U0	URO	R	428	c	0	1	6	inner_fore	inner_hind	1.29	8.94427			946	15	20	U0	ULO	L	247	c	0	3	10	outer_fore	outer_hind	1.18	4.47214				946	7
947	17	0.0073256	R0	RLO	L	c	1	1	2	outer_fore	1.21		947	7	79	U0	URO	R	429	c	0	1	6	inner_fore	inner_hind	1.27	8.88819			947	15	18	U0	ULO	L	248	c	0	3	10	outer_fore	outer_hind	1.2	4.24264				947	7
948	3	0.0142006	R0	RRO	R	c	1	2	3	inner_fore	1.36		948	7	82	U0	URO	R	430	c	0	1	6	inner_fore	inner_hind	1.28	9.05539			948	15	16	U0	ULO	L	249	c	0	3	10	outer_fore	outer_hind	1.1	4				948	7
949	3	0.0210009	R0	RRO	R	c	1	2	3	inner_fore	1.43		949	8	70	U0	URO	R	431	c	0	5	5	inner_fore	inner_hind	1.17	8.3666			949	15	18	U0	ULO	L	250	c	0	3	10	outer_fore	outer_hind	1.08	4.24264				949	8
950	3	0.0203969	R0	RRO	R	c	1	2	3	inner_fore	1.47		950	8	81	U0	URO	R	432	c	0	5	5	inner_fore	inner_hind	1.11	9			950	15	19	U0	ULO	L	251	c	0	3	10	outer_fore	outer_hind	1.14	4.3589				950	8
951	3	0.0226814	R0	RRO	R	c	1	2	3	inner_fore	1.38		951	8	79	U0	URO	R	433	c	0	5	5	inner_fore	inner_hind	1.22	8.88819			951	15	22	U0	ULO	L	252	c	0	3	10	outer_fore	outer_hind	1.19	4.69042				951	8
952	3	0.0155677	R0	RRO	R	c	1	2	3	inner_fore	1.32		952	8	78	U0	URO	R	434	c	0	5	5	inner_fore	inner_hind	1.21	8.83176			952	15	21	U0	ULO	L	253	c	0	3	10	outer_fore	outer_hind	1.16	4.58258				952	8
953	3	0.0235637	R0	RRO	R	c	1	2	3	inner_fore	1.36		953	8	84	U0	URO	R	435	c	0	5	5	inner_fore	inner_hind	1.18	9.16515			953	15	24	U0	ULO	L	254	c	0	3	10	outer_fore	outer_hind	1.17	4.89898				953	8
954	3	0.0189502	R0	RRO	R	c	1	2	3	inner_fore	1.37		954	8	80	U0	URO	R	436	c	0	5	5	inner_fore	inner_hind	1.21	8.94427			954	15	21	U0	ULO	L	255	c	0	3	10	outer_fore	outer_hind	1.16	4.58258				954	8
955	3	0.0232279	R0	RRO	R	c	1	2	3	inner_fore	1.41		955	8	85	U0	URO	R	437	c	0	5	5	inner_fore	inner_hind	1.26	9.21954			955	15	22	U0	ULO	L	256	c	0	3	10	outer_fore	outer_hind	1.16	4.69042				955	8
956	7	0.031903	R0	RRO	R	c	1	1	6	inner_fore	1.26		956	8	81	U0	URO	R	438	c	0	5	5	inner_fore	inner_hind	1.22	9			956	15	15	U0	ULO	L	257	c	0	3	10	outer_fore	outer_hind	1.16	3.87298				956	8
957	7	0.0187588	R0	RRO	R	c	1	1	6	inner_fore	1.24		957	8	71	U0	URO	R	439	c	0	5	5	inner_fore	inner_hind	1.21	8.42615			957	15	18	U0	ULO	L	258	c	0	3	10	outer_fore	outer_hind	1.16	4.24264				957	8
958	7	0.0121059	R0	RRO	R	c	1	1	6	inner_fore	1.25		958	8	73	U0	URO	R	440	c	0	5	5	inner_fore	inner_hind	1.2	8.544			958	15	16	U0	ULO	L	259	c	0	3	10	outer_fore	outer_hind	1.22	4				958	8
959	8	0.00580265	R0	RRO	R	c	1	5	5	inner_fore	1.25		959	8	82	U0	URO	R	441	c	0	5	5	inner_fore	inner_hind	1.26	9.05539			959	15	15	U0	ULO	L	260	c	0	3	10	outer_fore	outer_hind	1.19	3.87298				959	8
960	8	0.00354939	R0	RRO	R	c	1	5	5	inner_fore	1.22		960	8	86	U0	URO	R	442	c	0	5	5	inner_fore	inner_hind	1.26	9.27362			960	15	20	U0	ULO	L	261	c	0	3	10	outer_fore	outer_hind	1.19	4.47214				960	8
961	8	0.0057578	R0	RRO	R	c	1	5	5	inner_fore	1.28		961	8	73	U0	URO	R	443	c	0	5	5	inner_fore	inner_hind	1.28	8.544			961	15	21	U0	ULO	L	262	c	0	3	10	outer_fore	outer_hind	1.2	4.58258				961	8
962	8	0.00397302	R0	RRO	R	c	1	5	5	inner_fore	1.26		962	8	85	U0	URO	R	444	c	0	5	5	inner_fore	inner_hind	1.15	9.21954			962	15	25	U0	ULO	L	263	c	0	3	10	outer_fore	outer_hind	1.18	5				962	8
963	9	0.0129848	R0	RRO	R	c	1	3	6	inner_fore	1.16		963	8	86	U0	URO	R	445	c	0	5	5	inner_fore	inner_hind	1.26	9.27362			963	15	18	U0	ULO	L	264	c	0	3	10	outer_fore	outer_hind	1.2	4.24264				963	8
964	9	0.011788	R0	RRO	R	c	1	3	6	inner_fore	1.15		964	8	83	U0	URO	R	446	c	0	5	5	inner_fore	inner_hind	1.3	9.11043			964	17	17	U0	ULO	L	285	c	0	1	2	outer_fore	outer_hind	1.24	4.12311				964	8
965	9	0.00874109	R0	RRO	R	c	1	3	6	inner_fore	1.23		965	9	82	U0	URO	R	447	c	0	3	6	inner_fore	inner_hind	1.25	9.05539			965	17	19	U0	ULO	L	287	c	0	1	2	outer_fore	outer_hind	1.25	4.3589				965	9
966	9	0.0144259	R0	RRO	R	c	1	3	6	inner_fore	1.19		966	9	81	U0	URO	R	450	c	0	3	6	inner_fore	inner_hind	1.2	9			966	17	22	U0	ULO	L	288	c	0	1	2	outer_fore	outer_hind	1.21	4.69042				966	9
967	9	0.0179704	R0	RRO	R	c	1	3	6	inner_fore	1.17		967	9	82	U0	URO	R	451	c	0	3	6	inner_fore	inner_hind	1.17	9.05539			967	17	22	U0	ULO	L	289	c	0	1	2	outer_fore	outer_hind	1.23	4.69042				967	9
968	10	0.0116771	R0	RRO	R	c	1	5	7	inner_fore	1.31		968	9	83	U0	URO	R	452	c	0	3	6	inner_fore	inner_hind	1.22	9.11043			968	17	22	U0	ULO	L	292	c	0	1	2	outer_fore	outer_hind	1.24	4.69042				968	9
969	10	0.0178128	R0	RRO	R	c	1	5	7	inner_fore	1.32		969	9	82	U0	URO	R	453	c	0	3	6	inner_fore	inner_hind	1.22	9.05539			969	17	19	U0	ULO	L	293	c	0	1	2	outer_fore	outer_hind	1.28	4.3589				969	9
970	10	0.0159108	R0	RRO	R	c	1	5	7	inner_fore	1.28		970	9	75	U0	URO	R	454	c	0	3	6	inner_fore	inner_hind	1.23	8.66025			970	17	20	U0	ULO	L	297	c	0	1	2	outer_fore	outer_hind	1.22	4.47214				970	9
971	10	0.0166733	R0	RRO	R	c	1	5	7	inner_fore	1.29		971	9	79	U0	URO	R	455	c	0	3	6	inner_fore	inner_hind	1.19	8.88819			971	17	21	U0	ULO	L	298	c	0	1	2	outer_fore	outer_hind	1.16	4.58258				971	9
972	12	0.0392874	R0	RRO	R	c	1	1	8	inner_fore	1.1		972	9	82	U0	URO	R	456	c	0	3	6	inner_fore	inner_hind	1.19	9.05539			972	17	25	U0	ULO	L	299	c	0	1	2	outer_fore	outer_hind	1.21	5				972	9
973	12	0.0387685	R0	RRO	R	c	1	1	8	inner_fore	1.11		973	9	79	U0	URO	R	457	c	0	3	6	inner_fore	inner_hind	1.16	8.88819			973	17	25	U0	ULO	L	300	c	0	1	2	outer_fore	outer_hind	1.27	5				973	9
974	12	0.0198996	R0	RRO	R	c	1	1	8	inner_fore	1.11		974	9	78	U0	URO	R	458	c	0	3	6	inner_fore	inner_hind	1.17	8.83176			974	17	21	U0	ULO	L	301	c	0	1	2	outer_fore	outer_hind	1.27	4.58258				974	9
975	12	0.0273539	R0	RRO	R	c	1	1	8	inner_fore	1.11		975	9	80	U0	URO	R	459	c	0	3	6	inner_fore	inner_hind	1.22	8.94427			975	17	19	U0	ULO	L	302	c	0	1	2	outer_fore	outer_hind	1.29	4.3589				975	9
976	12	0.0283954	R0	RRO	R	c	1	1	8	inner_fore	1.14		976	9	83	U0	URO	R	462	c	0	3	6	inner_fore	inner_hind	1.22	9.11043			976	17	17	U0	ULO	L	303	c	0	1	2	outer_fore	outer_hind	1.23	4.12311				976	9
977	12	0.0327228	R0	RRO	R	c	1	1	8	inner_fore	1.07		977	9	85	U0	URO	R	463	c	0	3	6	inner_fore	inner_hind	1.21	9.21954			977	17	21	U0	ULO	L	304	c	0	1	2	outer_fore	outer_hind	1.28	4.58258				977	9
978	12	0.0297052	R0	RRO	R	c	1	1	8	inner_fore	1.1		978	9	82	U0	URO	R	464	c	0	3	6	inner_fore	inner_hind	1.17	9.05539			978	1	38	U0	URO	R	352	c	0	1	1	inner_fore	inner_hind	1.33	6.16441				978	9
979	12	0.0349794	R0	RRO	R	c	1	1	8	inner_fore	1.13		979	9	83	U0	URO	R	465	c	0	3	6	inner_fore	inner_hind	1.21	9.11043			979	1	35	U0	URO	R	353	c	0	1	1	inner_fore	inner_hind	1.35	5.91608				979	9
980	12	0.0193161	R0	RRO	R	c	1	1	8	inner_fore	1.1		980	9	80	U0	URO	R	466	c	0	3	6	inner_fore	inner_hind	1.21	8.94427			980	1	34	U0	URO	R	354	c	0	1	1	inner_fore	inner_hind	1.35	5.83095				980	9
981	12	0.028694	R0	RRO	R	c	1	1	8	inner_fore	1.13		981	9	80	U0	URO	R	467	c	0	3	6	inner_fore	inner_hind	1.23	8.94427			981	1	36	U0	URO	R	355	c	0	1	1	inner_fore	inner_hind	1.34	6				981	9
982	12	0.03029	R0	RRO	R	c	1	1	8	inner_fore	1.14		982	9	86	U0	URO	R	468	c	0	3	6	inner_fore	inner_hind	1.2	9.27362			982	1	47	U0	URO	R	356	c	0	1	1	inner_fore	inner_hind	1.37	6.85565				982	9
983	12	0.0222383	R0	RRO	R	c	1	1	8	inner_fore	1.16		983	9	77	U0	URO	R	469	c	0	3	6	inner_fore	inner_hind	1.25	8.77496			983	1	42	U0	URO	R	357	c	0	1	1	inner_fore	inner_hind	1.36	6.48074				983	9
984	12	0.0224464	R0	RRO	R	c	1	1	8	inner_fore	1.08		984	9	80	U0	URO	R	470	c	0	3	6	inner_fore	inner_hind	1.25	8.94427			984	1	37	U0	URO	R	358	c	0	1	1	inner_fore	inner_hind	1.4	6.08276				984	9
985	12	0.0262448	R0	RRO	R	c	1	1	8	inner_fore	1.15		985	9	80	U0	URO	R	471	c	0	3	6	inner_fore	inner_hind	1.2	8.94427			985	1	37	U0	URO	R	359	c	0	1	1	inner_fore	inner_hind	1.39	6.08276				985	9
986	12	0.0222577	R0	RRO	R	c	1	1	8	inner_fore	1.13		986	9	83	U0	URO	R	472	c	0	3	6	inner_fore	inner_hind	1.15	9.11043			986	1	35	U0	URO	R	360	c	0	1	1	inner_fore	inner_hind	1.37	5.91608				986	9
987	12	0.0145439	R0	RRO	R	c	1	1	8	inner_fore	1.14		987	10	69	U0	URO	R	474	c	0	5	7	inner_fore	inner_hind	1.38	8.30662			987	1	41	U0	URO	R	361	c	0	1	1	inner_fore	inner_hind	1.3	6.40312				987	10
988	15	0.0164099	R0	RRO	R	c	1	3	10	inner_fore	1.16		988	10	76	U0	URO	R	475	c	0	5	7	inner_fore	inner_hind	1.36	8.7178			988	1	40	U0	URO	R	362	c	0	1	1	inner_fore	inner_hind	1.36	6.32456				988	10
989	15	0.015981	R0	RRO	R	c	1	3	10	inner_fore	1.23		989	10	75	U0	URO	R	476	c	0	5	7	inner_fore	inner_hind	1.32	8.66025			989	1	40	U0	URO	R	363	c	0	1	1	inner_fore	inner_hind	1.36	6.32456				989	10
990	15	0.0168496	R0	RRO	R	c	1	3	10	inner_fore	1.26		990	10	75	U0	URO	R	477	c	0	5	7	inner_fore	inner_hind	1.32	8.66025			990	1	37	U0	URO	R	364	c	0	1	1	inner_fore	inner_hind	1.37	6.08276				990	10
991	15	0.0050554	R0	RRO	R	c	1	3	10	inner_fore	1.18		991	10	70	U0	URO	R	478	c	0	5	7	inner_fore	inner_hind	1.34	8.3666			991	2	28	U0	URO	R	365	c	0	3	2	inner_fore	inner_hind	1.34	5.2915				991	10
992	15	0.0176605	R0	RRO	R	c	1	3	10	inner_fore	1.21		992	10	78	U0	URO	R	479	c	0	5	7	inner_fore	inner_hind	1.35	8.83176			992	2	25	U0	URO	R	366	c	0	3	2	inner_fore	inner_hind	1.29	5				992	10
993	17	0.0072347	R0	RRO	R	c	1	1	2	inner_fore	1.21		993	10	70	U0	URO	R	480	c	0	5	7	inner_fore	inner_hind	1.35	8.3666			993	2	25	U0	URO	R	367	c	0	3	2	inner_fore	inner_hind	1.32	5				993	10
994	1	0.0224303	gang	gang	S	S	0	1	1	stra_fore	1.43		994	10	85	U0	URO	R	481	c	0	5	7	inner_fore	inner_hind	1.36	9.21954			994	2	48	U0	URO	R	368	c	0	3	2	inner_fore	inner_hind	1.39	6.9282				994	10
995	1	0.0244752	gang	gang	S	S	0	1	1	stra_fore	1.15		995	10	76	U0	URO	R	482	c	0	5	7	inner_fore	inner_hind	1.37	8.7178			995	2	24	U0	URO	R	369	c	0	3	2	inner_fore	inner_hind	1.4	4.89898				995	10
996	1	0.02397	gang	gang	S	S	0	1	1	stra_fore	1.15		996	10	77	U0	URO	R	483	c	0	5	7	inner_fore	inner_hind	1.35	8.77496			996	2	49	U0	URO	R	370	c	0	3	2	inner_fore	inner_hind	1.41	7				996	10
997	1	0.026041	gang	gang	S	S	0	1	1	stra_fore	1.15		997	10	88	U0	URO	R	484	c	0	5	7	inner_fore	inner_hind	1.44	9.38083			997	3	47	U0	URO	R	372	c	0	2	3	inner_fore	inner_hind	1.44	6.85565				997	10
998	1	0.0162778	gang	gang	S	S	0	1	1	stra_fore	1.14		998	10	82	U0	URO	R	485	c	0	5	7	inner_fore	inner_hind	1.5	9.05539			998	3	27	U0	URO	R	373	c	0	2	3	inner_fore	inner_hind	1.43	5.19615				998	10
999	1	0.020615	gang	gang	S	S	0	1	1	stra_fore	1.2		999	10	75	U0	URO	R	486	c	0	5	7	inner_fore	inner_hind	1.44	8.66025			999	3	36	U0	URO	R	374	c	0	2	3	inner_fore	inner_hind	1.49	6				999	10
1000	1	0.0121337	gang	gang	S	S	0	1	1	stra_fore	1.13		1000	10	69	U0	URO	R	487	c	0	5	7	inner_fore	inner_hind	1.38	8.30662			1000	3	28	U0	URO	R	377	c	0	2	3	inner_fore	inner_hind	1.52	5.2915				1000	10
1001	2	0.015065	gang	gang	S	S	0	3	2	stra_fore	1.29		1001	10	78	U0	URO	R	488	c	0	5	7	inner_fore	inner_hind	1.4	8.83176			1001	3	48	U0	URO	R	378	c	0	2	3	inner_fore	inner_hind	1.51	6.9282				1001	10
1002	2	0.0299449	gang	gang	S	S	0	3	2	stra_fore	1.21		1002	10	90	U0	URO	R	490	c	0	5	7	inner_fore	inner_hind	1.36	9.48683			1002	3	47	U0	URO	R	380	c	0	2	3	inner_fore	inner_hind	1.46	6.85565				1002	10
1003	2	0.0243378	gang	gang	S	S	0	3	2	stra_fore	1.18		1003	10	79	U0	URO	R	491	c	0	5	7	inner_fore	inner_hind	1.35	8.88819			1003	3	44	U0	URO	R	381	c	0	2	3	inner_fore	inner_hind	1.52	6.63325				1003	10
1004	2	0.0203339	gang	gang	S	S	0	3	2	stra_fore	1.23		1004	10	73	U0	URO	R	492	c	0	5	7	inner_fore	inner_hind	1.4	8.544			1004	4	29	U0	URO	R	384	c	0	2	4	inner_fore	inner_hind	1.33	5.38516				1004	10
1005	2	0.023986	gang	gang	S	S	0	3	2	stra_fore	1.21		1005	11	89	U0	URO	R	494	c	0	3	1	inner_fore	inner_hind	1.31	9.43398			1005	4	31	U0	URO	R	385	c	0	2	4	inner_fore	inner_hind	1.27	5.56776				1005	11
1006	2	0.0192082	gang	gang	S	S	0	3	2	stra_fore	1.23		1006	11	90	U0	URO	R	496	c	0	3	1	inner_fore	inner_hind	1.29	9.48683			1006	4	31	U0	URO	R	386	c	0	2	4	inner_fore	inner_hind	1.28	5.56776				1006	11
1007	3	0.0220229	gang	gang	S	S	0	2	3	stra_fore	1.24		1007	11	90	U0	URO	R	499	c	0	3	1	inner_fore	inner_hind	1.29	9.48683			1007	4	23	U0	URO	R	387	c	0	2	4	inner_fore	inner_hind	1.39	4.79583				1007	11
1008	3	0.0354983	gang	gang	S	S	0	2	3	stra_fore	1.25		1008	11	87	U0	URO	R	503	c	0	3	1	inner_fore	inner_hind	1.3	9.32738			1008	4	32	U0	URO	R	389	c	0	2	4	inner_fore	inner_hind	1.36	5.65685				1008	11
1009	3	0.0128598	gang	gang	S	S	0	2	3	stra_fore	1.32		1009	11	72	U0	URO	R	506	c	0	3	1	inner_fore	inner_hind	1.24	8.48528			1009	4	31	U0	URO	R	391	c	0	2	4	inner_fore	inner_hind	1.32	5.56776				1009	11
1010	3	0.0252895	gang	gang	S	S	0	2	3	stra_fore	1.33		1010	11	76	U0	URO	R	508	c	0	3	1	inner_fore	inner_hind	1.35	8.7178			1010	4	31	U0	URO	R	392	c	0	2	4	inner_fore	inner_hind	1.23	5.56776				1010	11
1011	3	0.0197602	gang	gang	S	S	0	2	3	stra_fore	1.35		1011	11	86	U0	URO	R	509	c	0	3	1	inner_fore	inner_hind	1.32	9.27362			1011	4	29	U0	URO	R	393	c	0	2	4	inner_fore	inner_hind	1.29	5.38516				1011	11
1012	3	0.0190796	gang	gang	S	S	0	2	3	stra_fore	1.3		1012	11	92	U0	URO	R	510	c	0	3	1	inner_fore	inner_hind	1.23	9.59166			1012	4	27	U0	URO	R	394	c	0	2	4	inner_fore	inner_hind	1.3	5.19615				1012	11
1013	3	0.0128614	gang	gang	S	S	0	2	3	stra_fore	1.29		1013	11	91	U0	URO	R	511	c	0	3	1	inner_fore	inner_hind	1.2	9.53939			1013	5	30	U0	URO	R	395	c	0	4	5	inner_fore	inner_hind	1.38	5.47723				1013	11
1014	3	0.022877	gang	gang	S	S	0	2	3	stra_fore	1.26		1014	11	90	U0	URO	R	512	c	0	3	1	inner_fore	inner_hind	1.22	9.48683			1014	5	34	U0	URO	R	396	c	0	4	5	inner_fore	inner_hind	1.37	5.83095				1014	11
1015	5	0.0130671	gang	gang	S	S	0	4	5	stra_fore	1.31		1015	12	81	U0	URO	R	514	c	0	1	8	inner_fore	inner_hind	1.17	9			1015	5	30	U0	URO	R	406	c	0	4	5	inner_fore	inner_hind	1.43	5.47723				1015	12
1016	5	0.0109188	gang	gang	S	S	0	4	5	stra_fore	1.29		1016	12	71	U0	URO	R	515	c	0	1	8	inner_fore	inner_hind	1.15	8.42615			1016	7	19	U0	URO	R	422	c	0	1	6	inner_fore	inner_hind	1.26	4.3589				1016	12
1017	7	0.0224303	gang	gang	S	S	0	1	6	stra_fore	1.43		1017	12	79	U0	URO	R	516	c	0	1	8	inner_fore	inner_hind	1.2	8.88819			1017	7	22	U0	URO	R	423	c	0	1	6	inner_fore	inner_hind	1.27	4.69042				1017	12
1018	7	0.0244752	gang	gang	S	S	0	1	6	stra_fore	1.15		1018	12	79	U0	URO	R	517	c	0	1	8	inner_fore	inner_hind	1.19	8.88819			1018	7	18	U0	URO	R	424	c	0	1	6	inner_fore	inner_hind	1.25	4.24264				1018	12
1019	7	0.02397	gang	gang	S	S	0	1	6	stra_fore	1.15		1019	12	87	U0	URO	R	518	c	0	1	8	inner_fore	inner_hind	1.22	9.32738			1019	7	17	U0	URO	R	425	c	0	1	6	inner_fore	inner_hind	1.24	4.12311				1019	12
1020	7	0.026041	gang	gang	S	S	0	1	6	stra_fore	1.15		1020	12	76	U0	URO	R	519	c	0	1	8	inner_fore	inner_hind	1.18	8.7178			1020	7	18	U0	URO	R	426	c	0	1	6	inner_fore	inner_hind	1.25	4.24264				1020	12
1021	7	0.0162778	gang	gang	S	S	0	1	6	stra_fore	1.14		1021	12	67	U0	URO	R	520	c	0	1	8	inner_fore	inner_hind	1.17	8.18535			1021	7	23	U0	URO	R	429	c	0	1	6	inner_fore	inner_hind	1.27	4.79583				1021	12
1022	7	0.020615	gang	gang	S	S	0	1	6	stra_fore	1.2		1022	12	74	U0	URO	R	521	c	0	1	8	inner_fore	inner_hind	1.19	8.60233			1022	7	28	U0	URO	R	430	c	0	1	6	inner_fore	inner_hind	1.28	5.2915				1022	12
1023	7	0.0121337	gang	gang	S	S	0	1	6	stra_fore	1.13		1023	12	74	U0	URO	R	522	c	0	1	8	inner_fore	inner_hind	1.25	8.60233			1023	8	20	U0	URO	R	432	c	0	5	5	inner_fore	inner_hind	1.11	4.47214				1023	12
1024	8	0.0171681	gang	gang	S	S	0	5	5	stra_fore	1.15		1024	14	88	U0	URO	R	541	c	0	1	9	inner_fore	inner_hind	1.25	9.38083			1024	8	29	U0	URO	R	433	c	0	5	5	inner_fore	inner_hind	1.22	5.38516				1024	14
1025	8	0.0132677	gang	gang	S	S	0	5	5	stra_fore	1.14		1025	14	89	U0	URO	R	545	c	0	1	9	inner_fore	inner_hind	1.2	9.43398			1025	8	24	U0	URO	R	434	c	0	5	5	inner_fore	inner_hind	1.21	4.89898				1025	14
1026	8	0.0230304	gang	gang	S	S	0	5	5	stra_fore	1.21		1026	14	91	U0	URO	R	549	c	0	1	9	inner_fore	inner_hind	1.25	9.53939			1026	8	28	U0	URO	R	435	c	0	5	5	inner_fore	inner_hind	1.18	5.2915				1026	14
1027	8	0.00958147	gang	gang	S	S	0	5	5	stra_fore	1.19		1027	15	82	U0	URO	R	552	c	0	3	10	inner_fore	inner_hind	1.16	9.05539			1027	8	27	U0	URO	R	436	c	0	5	5	inner_fore	inner_hind	1.21	5.19615				1027	15
1028	8	0.00875211	gang	gang	S	S	0	5	5	stra_fore	1.22		1028	15	82	U0	URO	R	553	c	0	3	10	inner_fore	inner_hind	1.2	9.05539			1028	8	28	U0	URO	R	437	c	0	5	5	inner_fore	inner_hind	1.26	5.2915				1028	15
1029	8	0.0172869	gang	gang	S	S	0	5	5	stra_fore	1.23		1029	15	71	U0	URO	R	554	c	0	3	10	inner_fore	inner_hind	1.14	8.42615			1029	8	29	U0	URO	R	438	c	0	5	5	inner_fore	inner_hind	1.22	5.38516				1029	15
1030	8	0.0138262	gang	gang	S	S	0	5	5	stra_fore	1.2		1030	15	75	U0	URO	R	555	c	0	3	10	inner_fore	inner_hind	1.14	8.66025			1030	8	28	U0	URO	R	439	c	0	5	5	inner_fore	inner_hind	1.21	5.2915				1030	15
1031	8	0.0105056	gang	gang	S	S	0	5	5	stra_fore	1.21		1031	15	89	U0	URO	R	556	c	0	3	10	inner_fore	inner_hind	1.16	9.43398			1031	8	26	U0	URO	R	440	c	0	5	5	inner_fore	inner_hind	1.2	5.09902				1031	15
1032	8	0.0162711	gang	gang	S	S	0	5	5	stra_fore	1.25		1032	15	84	U0	URO	R	557	c	0	3	10	inner_fore	inner_hind	1.22	9.16515			1032	8	28	U0	URO	R	441	c	0	5	5	inner_fore	inner_hind	1.26	5.2915				1032	15
1033	8	0.0093724	gang	gang	S	S	0	5	5	stra_fore	1.25		1033	15	83	U0	URO	R	558	c	0	3	10	inner_fore	inner_hind	1.16	9.11043			1033	8	28	U0	URO	R	442	c	0	5	5	inner_fore	inner_hind	1.26	5.2915				1033	15
1034	8	0.0125562	gang	gang	S	S	0	5	5	stra_fore	1.25		1034	15	75	U0	URO	R	559	c	0	3	10	inner_fore	inner_hind	1.14	8.66025			1034	8	21	U0	URO	R	443	c	0	5	5	inner_fore	inner_hind	1.28	4.58258				1034	15
1035	8	0.0128258	gang	gang	S	S	0	5	5	stra_fore	1.25		1035	15	70	U0	URO	R	560	c	0	3	10	inner_fore	inner_hind	1.18	8.3666			1035	8	19	U0	URO	R	444	c	0	5	5	inner_fore	inner_hind	1.15	4.3589				1035	15
1036	9	0.0323215	gang	gang	S	S	0	3	6	stra_fore	1.07		1036	15	73	U0	URO	R	561	c	0	3	10	inner_fore	inner_hind	1.12	8.544			1036	8	28	U0	URO	R	445	c	0	5	5	inner_fore	inner_hind	1.26	5.2915				1036	15
1037	9	0.0219754	gang	gang	S	S	0	3	6	stra_fore	1.08		1037	15	71	U0	URO	R	562	c	0	3	10	inner_fore	inner_hind	1.2	8.42615			1037	8	28	U0	URO	R	446	c	0	5	5	inner_fore	inner_hind	1.3	5.2915				1037	15
1038	9	0.0181752	gang	gang	S	S	0	3	6	stra_fore	1.1		1038	15	73	U0	URO	R	563	c	0	3	10	inner_fore	inner_hind	1.22	8.544			1038	9	24	U0	URO	R	447	c	0	3	6	inner_fore	inner_hind	1.25	4.89898				1038	15
1039	10	0.0219289	gang	gang	S	S	0	5	7	stra_fore	1.18		1039	17	92	U0	URO	R	587	c	0	1	2	inner_fore	inner_hind	1.23	9.59166			1039	9	21	U0	URO	R	450	c	0	3	6	inner_fore	inner_hind	1.2	4.58258				1039	17
1040	10	0.023889	gang	gang	S	S	0	5	7	stra_fore	1.19		1040	17	84	U0	URO	R	589	c	0	1	2	inner_fore	inner_hind	1.2	9.16515			1040	9	24	U0	URO	R	451	c	0	3	6	inner_fore	inner_hind	1.17	4.89898				1040	17
1041	10	0.0301209	gang	gang	S	S	0	5	7	stra_fore	1.17		1041	17	81	U0	URO	R	590	c	0	1	2	inner_fore	inner_hind	1.28	9			1041	9	22	U0	URO	R	452	c	0	3	6	inner_fore	inner_hind	1.22	4.69042				1041	17
1042	10	0.0219306	gang	gang	S	S	0	5	7	stra_fore	1.22		1042	17	93	U0	URO	R	592	c	0	1	2	inner_fore	inner_hind	1.25	9.64365			1042	9	22	U0	URO	R	453	c	0	3	6	inner_fore	inner_hind	1.22	4.69042				1042	17
1043	10	0.0068061	gang	gang	S	S	0	5	7	stra_fore	1.22		1043	17	92	U0	URO	R	595	c	0	1	2	inner_fore	inner_hind	1.25	9.59166			1043	9	20	U0	URO	R	454	c	0	3	6	inner_fore	inner_hind	1.23	4.47214				1043	17
1044	10	0.0215769	gang	gang	S	S	0	5	7	stra_fore	1.26		1044	17	85	U0	URO	R	598	c	0	1	2	inner_fore	inner_hind	1.26	9.21954			1044	9	19	U0	URO	R	455	c	0	3	6	inner_fore	inner_hind	1.19	4.3589				1044	17
1045	10	0.0150136	gang	gang	S	S	0	5	7	stra_fore	1.2		1045	17	85	U0	URO	R	599	c	0	1	2	inner_fore	inner_hind	1.28	9.21954			1045	9	22	U0	URO	R	456	c	0	3	6	inner_fore	inner_hind	1.19	4.69042				1045	17
1046	10	0.011934	gang	gang	S	S	0	5	7	stra_fore	1.25		1046	17	91	U0	URO	R	600	c	0	1	2	inner_fore	inner_hind	1.22	9.53939			1046	9	18	U0	URO	R	457	c	0	3	6	inner_fore	inner_hind	1.16	4.24264				1046	17
1047	10	0.0215695	gang	gang	S	S	0	5	7	stra_fore	1.17		1047	17	91	U0	URO	R	603	c	0	1	2	inner_fore	inner_hind	1.18	9.53939			1047	9	19	U0	URO	R	458	c	0	3	6	inner_fore	inner_hind	1.17	4.3589				1047	17
1048	11	0.0124893	gang	gang	S	S	0	3	1	stra_fore	1.13		1048	17	91	U0	URO	R	608	c	0	1	2	inner_fore	inner_hind	1.34	9.53939			1048	9	20	U0	URO	R	459	c	0	3	6	inner_fore	inner_hind	1.22	4.47214				1048	17
1049	11	0.0119452	gang	gang	S	S	0	3	1	stra_fore	1.19		1049	1	70	R0	RLO	L	651	c	1	1	1	outer_fore	outer_hind	1.3	8.3666			1049	9	23	U0	URO	R	461	c	0	3	6	inner_fore	inner_hind	1.18	4.79583				1049	1
1050	11	0.014272	gang	gang	S	S	0	3	1	stra_fore	1.16		1050	2	82	R0	RLO	L	653	c	1	3	2	outer_fore	outer_hind	1.4	9.05539			1050	9	21	U0	URO	R	462	c	0	3	6	inner_fore	inner_hind	1.22	4.58258				1050	2
1051	11	0.00821736	gang	gang	S	S	0	3	1	stra_fore	1.16		1051	2	82	R0	RLO	L	655	c	1	3	2	outer_fore	outer_hind	1.39	9.05539			1051	9	23	U0	URO	R	463	c	0	3	6	inner_fore	inner_hind	1.21	4.79583				1051	2
1052	11	0.0113446	gang	gang	S	S	0	3	1	stra_fore	1.18		1052	2	71	R0	RLO	L	656	c	1	3	2	outer_fore	outer_hind	1.39	8.42615			1052	9	23	U0	URO	R	464	c	0	3	6	inner_fore	inner_hind	1.17	4.79583				1052	2
1053	11	0.0124417	gang	gang	S	S	0	3	1	stra_fore	1.18		1053	3	79	R0	RLO	L	659	c	1	2	3	outer_fore	outer_hind	1.55	8.88819			1053	9	21	U0	URO	R	465	c	0	3	6	inner_fore	inner_hind	1.21	4.58258				1053	3
1054	11	0.0107395	gang	gang	S	S	0	3	1	stra_fore	1.18		1054	3	82	R0	RLO	L	662	c	1	2	3	outer_fore	outer_hind	1.58	9.05539			1054	9	21	U0	URO	R	466	c	0	3	6	inner_fore	inner_hind	1.21	4.58258				1054	3
1055	11	0.00902041	gang	gang	S	S	0	3	1	stra_fore	1.16		1055	4	72	R0	RLO	L	664	c	1	2	4	outer_fore	outer_hind	1.32	8.48528			1055	9	21	U0	URO	R	467	c	0	3	6	inner_fore	inner_hind	1.23	4.58258				1055	4
1056	11	0.00905978	gang	gang	S	S	0	3	1	stra_fore	1.23		1056	5	78	R0	RLO	L	672	c	1	4	5	outer_fore	outer_hind	1.4	8.83176			1056	9	21	U0	URO	R	468	c	0	3	6	inner_fore	inner_hind	1.2	4.58258				1056	5
1057	11	0.012699	gang	gang	S	S	0	3	1	stra_fore	1.23		1057	5	63	R0	RLO	L	673	c	1	4	5	outer_fore	outer_hind	1.37	7.93725			1057	9	20	U0	URO	R	469	c	0	3	6	inner_fore	inner_hind	1.25	4.47214				1057	5
1058	12	0.0206052	gang	gang	S	S	0	1	8	stra_fore	1.11		1058	7	85	R0	RLO	L	681	c	1	1	6	outer_fore	outer_hind	1.25	9.21954			1058	9	18	U0	URO	R	470	c	0	3	6	inner_fore	inner_hind	1.25	4.24264				1058	7
1059	12	0.0327424	gang	gang	S	S	0	1	8	stra_fore	1.15		1059	7	85	R0	RLO	L	682	c	1	1	6	outer_fore	outer_hind	1.25	9.21954			1059	9	19	U0	URO	R	471	c	0	3	6	inner_fore	inner_hind	1.2	4.3589				1059	7
1060	12	0.020203	gang	gang	S	S	0	1	8	stra_fore	1.19		1060	7	79	R0	RLO	L	683	c	1	1	6	outer_fore	outer_hind	1.28	8.88819			1060	9	19	U0	URO	R	472	c	0	3	6	inner_fore	inner_hind	1.15	4.3589				1060	7
1061	12	0.0257579	gang	gang	S	S	0	1	8	stra_fore	1.17		1061	8	70	R0	RLO	L	684	c	1	5	5	outer_fore	outer_hind	1.36	8.3666			1061	10	34	U0	URO	R	473	c	0	5	7	inner_fore	inner_hind	1.3	5.83095				1061	8
1062	12	0.0335701	gang	gang	S	S	0	1	8	stra_fore	1.07		1062	8	67	R0	RLO	L	686	c	1	5	5	outer_fore	outer_hind	1.35	8.18535			1062	10	28	U0	URO	R	475	c	0	5	7	inner_fore	inner_hind	1.36	5.2915				1062	8
1063	12	0.0224117	gang	gang	S	S	0	1	8	stra_fore	1.17		1063	8	66	R0	RLO	L	687	c	1	5	5	outer_fore	outer_hind	1.24	8.12404			1063	10	32	U0	URO	R	476	c	0	5	7	inner_fore	inner_hind	1.32	5.65685				1063	8
1064	12	0.0204304	gang	gang	S	S	0	1	8	stra_fore	1.2		1064	8	80	R0	RLO	L	688	c	1	5	5	outer_fore	outer_hind	1.19	8.94427			1064	10	28	U0	URO	R	477	c	0	5	7	inner_fore	inner_hind	1.32	5.2915				1064	8
1065	12	0.017266	gang	gang	S	S	0	1	8	stra_fore	1.25		1065	8	67	R0	RLO	L	692	c	1	5	5	outer_fore	outer_hind	1.29	8.18535			1065	10	27	U0	URO	R	478	c	0	5	7	inner_fore	inner_hind	1.34	5.19615				1065	8
1066	14	0.0133796	gang	gang	S	S	0	1	9	stra_fore	1.24		1066	8	72	R0	RLO	L	693	c	1	5	5	outer_fore	outer_hind	1.27	8.48528			1066	10	32	U0	URO	R	479	c	0	5	7	inner_fore	inner_hind	1.35	5.65685				1066	8
1067	14	0.00821822	gang	gang	S	S	0	1	9	stra_fore	1.21		1067	8	68	R0	RLO	L	694	c	1	5	5	outer_fore	outer_hind	1.3	8.24621			1067	10	28	U0	URO	R	480	c	0	5	7	inner_fore	inner_hind	1.35	5.2915				1067	8
1068	14	0.010488	gang	gang	S	S	0	1	9	stra_fore	1.23		1068	8	63	R0	RLO	L	696	c	1	5	5	outer_fore	outer_hind	1.19	7.93725			1068	10	48	U0	URO	R	481	c	0	5	7	inner_fore	inner_hind	1.36	6.9282				1068	8
1069	14	0.0102766	gang	gang	S	S	0	1	9	stra_fore	1.21		1069	8	72	R0	RLO	L	702	c	1	5	5	outer_fore	outer_hind	1.21	8.48528			1069	10	32	U0	URO	R	482	c	0	5	7	inner_fore	inner_hind	1.37	5.65685				1069	8
1070	14	0.00923508	gang	gang	S	S	0	1	9	stra_fore	1.24		1070	8	66	R0	RLO	L	705	c	1	5	5	outer_fore	outer_hind	1.32	8.12404			1070	10	34	U0	URO	R	483	c	0	5	7	inner_fore	inner_hind	1.35	5.83095				1070	8
1071	15	0.0234199	gang	gang	S	S	0	3	10	stra_fore	1.16		1071	8	63	R0	RLO	L	708	c	1	5	5	outer_fore	outer_hind	1.31	7.93725			1071	10	47	U0	URO	R	485	c	0	5	7	inner_fore	inner_hind	1.5	6.85565				1071	8
1072	15	0.0202558	gang	gang	S	S	0	3	10	stra_fore	1.21		1072	8	69	R0	RLO	L	709	c	1	5	5	outer_fore	outer_hind	1.25	8.30662			1072	10	33	U0	URO	R	486	c	0	5	7	inner_fore	inner_hind	1.44	5.74456				1072	8
1073	15	0.0274844	gang	gang	S	S	0	3	10	stra_fore	1.19		1073	8	67	R0	RLO	L	712	c	1	5	5	outer_fore	outer_hind	1.25	8.18535			1073	10	31	U0	URO	R	487	c	0	5	7	inner_fore	inner_hind	1.38	5.56776				1073	8
1074	15	0.02357	gang	gang	S	S	0	3	10	stra_fore	1.18		1074	8	66	R0	RLO	L	714	c	1	5	5	outer_fore	outer_hind	1.26	8.12404			1074	10	32	U0	URO	R	491	c	0	5	7	inner_fore	inner_hind	1.35	5.65685				1074	8
1075	15	0.0190268	gang	gang	S	S	0	3	10	stra_fore	1.24		1075	8	70	R0	RLO	L	715	c	1	5	5	outer_fore	outer_hind	1.24	8.3666			1075	10	29	U0	URO	R	492	c	0	5	7	inner_fore	inner_hind	1.4	5.38516				1075	8
1076	15	0.0327058	gang	gang	S	S	0	3	10	stra_fore	1.18		1076	8	75	R0	RLO	L	717	c	1	5	5	outer_fore	outer_hind	1.31	8.66025			1076	11	40	U0	URO	R	493	c	0	3	1	inner_fore	inner_hind	1.28	6.32456				1076	8
1077	15	0.03138	gang	gang	S	S	0	3	10	stra_fore	1.17		1077	9	78	R0	RLO	L	718	c	1	3	6	outer_fore	outer_hind	1.21	8.83176			1077	11	37	U0	URO	R	494	c	0	3	1	inner_fore	inner_hind	1.31	6.08276				1077	9
1078	15	0.0290619	gang	gang	S	S	0	3	10	stra_fore	1.23		1078	9	76	R0	RLO	L	720	c	1	3	6	outer_fore	outer_hind	1.27	8.7178			1078	11	32	U0	URO	R	495	c	0	3	1	inner_fore	inner_hind	1.31	5.65685				1078	9
1079	15	0.0197819	gang	gang	S	S	0	3	10	stra_fore	1.23		1079	9	74	R0	RLO	L	721	c	1	3	6	outer_fore	outer_hind	1.2	8.60233			1079	11	28	U0	URO	R	496	c	0	3	1	inner_fore	inner_hind	1.29	5.2915				1079	9
1080	15	0.0308334	gang	gang	S	S	0	3	10	stra_fore	1.18		1080	9	80	R0	RLO	L	723	c	1	3	6	outer_fore	outer_hind	1.21	8.94427			1080	11	36	U0	URO	R	497	c	0	3	1	inner_fore	inner_hind	1.22	6				1080	9
1081	15	0.0298857	gang	gang	S	S	0	3	10	stra_fore	1.15		1081	9	81	R0	RLO	L	724	c	1	3	6	outer_fore	outer_hind	1.23	9			1081	11	30	U0	URO	R	499	c	0	3	1	inner_fore	inner_hind	1.29	5.47723				1081	9
1082	15	0.0234448	gang	gang	S	S	0	3	10	stra_fore	1.28		1082	9	74	R0	RLO	L	727	c	1	3	6	outer_fore	outer_hind	1.25	8.60233			1082	11	34	U0	URO	R	500	c	0	3	1	inner_fore	inner_hind	1.27	5.83095				1082	9
1083	15	0.0103224	gang	gang	S	S	0	3	10	stra_fore	1.18		1083	9	94	R0	RLO	L	728	c	1	3	6	outer_fore	outer_hind	1.18	9.69536			1083	11	37	U0	URO	R	501	c	0	3	1	inner_fore	inner_hind	1.25	6.08276				1083	9
1084	17	0.0136297	gang	gang	S	S	0	1	2	stra_fore	1.14		1084	9	77	R0	RLO	L	729	c	1	3	6	outer_fore	outer_hind	1.19	8.77496			1084	11	38	U0	URO	R	502	c	0	3	1	inner_fore	inner_hind	1.28	6.16441				1084	9
1085	17	0.0217386	gang	gang	S	S	0	1	2	stra_fore	1.13		1085	9	75	R0	RLO	L	730	c	1	3	6	outer_fore	outer_hind	1.22	8.66025			1085	11	32	U0	URO	R	503	c	0	3	1	inner_fore	inner_hind	1.3	5.65685				1085	9
1086	17	0.0148293	gang	gang	S	S	0	1	2	stra_fore	1.13		1086	9	76	R0	RLO	L	732	c	1	3	6	outer_fore	outer_hind	1.24	8.7178			1086	11	29	U0	URO	R	504	c	0	3	1	inner_fore	inner_hind	1.25	5.38516				1086	9
1087	17	0.0154871	gang	gang	S	S	0	1	2	stra_fore	1.14		1087	9	77	R0	RLO	L	733	c	1	3	6	outer_fore	outer_hind	1.26	8.77496			1087	11	31	U0	URO	R	505	c	0	3	1	inner_fore	inner_hind	1.26	5.56776				1087	9
1088	17	0.0132361	gang	gang	S	S	0	1	2	stra_fore	1.15		1088	9	75	R0	RLO	L	734	c	1	3	6	outer_fore	outer_hind	1.26	8.66025			1088	11	35	U0	URO	R	507	c	0	3	1	inner_fore	inner_hind	1.31	5.91608				1088	9
1089	17	0.0103821	gang	gang	S	S	0	1	2	stra_fore	1.16		1089	9	76	R0	RLO	L	735	c	1	3	6	outer_fore	outer_hind	1.27	8.7178			1089	11	34	U0	URO	R	508	c	0	3	1	inner_fore	inner_hind	1.35	5.83095				1089	9
1090	17	0.0143727	gang	gang	S	S	0	1	2	stra_fore	1.21		1090	9	94	R0	RLO	L	736	c	1	3	6	outer_fore	outer_hind	1.21	9.69536			1090	11	33	U0	URO	R	509	c	0	3	1	inner_fore	inner_hind	1.32	5.74456				1090	9
1091	17	0.0196724	gang	gang	S	S	0	1	2	stra_fore	1.34		1091	10	71	R0	RLO	L	741	c	1	5	7	outer_fore	outer_hind	1.34	8.42615			1091	11	39	U0	URO	R	510	c	0	3	1	inner_fore	inner_hind	1.23	6.245				1091	10
1092	1	0.0330077	gang	gang1	S	S	0	1	1	stra_fore	0.96		1092	10	69	R0	RLO	L	742	c	1	5	7	outer_fore	outer_hind	1.32	8.30662			1092	11	35	U0	URO	R	511	c	0	3	1	inner_fore	inner_hind	1.2	5.91608				1092	10
1093	1	0.0231796	gang	gang1	S	S	0	1	1	stra_fore	1.11		1093	10	73	R0	RLO	L	743	c	1	5	7	outer_fore	outer_hind	1.19	8.544			1093	11	31	U0	URO	R	512	c	0	3	1	inner_fore	inner_hind	1.22	5.56776				1093	10
1094	1	0.0221868	gang	gang1	S	S	0	1	1	stra_fore	1.12		1094	10	69	R0	RLO	L	744	c	1	5	7	outer_fore	outer_hind	1.29	8.30662			1094	11	33	U0	URO	R	513	c	0	3	1	inner_fore	inner_hind	1.2	5.74456				1094	10
1095	2	0.0228687	gang	gang1	S	S	0	3	2	stra_fore	1.14		1095	10	67	R0	RLO	L	745	c	1	5	7	outer_fore	outer_hind	1.32	8.18535			1095	12	27	U0	URO	R	514	c	0	1	8	inner_fore	inner_hind	1.17	5.19615				1095	10
1096	2	0.0319619	gang	gang1	S	S	0	3	2	stra_fore	1.19		1096	10	68	R0	RLO	L	746	c	1	5	7	outer_fore	outer_hind	1.27	8.24621			1096	12	27	U0	URO	R	515	c	0	1	8	inner_fore	inner_hind	1.15	5.19615				1096	10
1097	2	0.0218665	gang	gang1	S	S	0	3	2	stra_fore	1.17		1097	10	71	R0	RLO	L	747	c	1	5	7	outer_fore	outer_hind	1.36	8.42615			1097	12	19	U0	URO	R	516	c	0	1	8	inner_fore	inner_hind	1.2	4.3589				1097	10
1098	2	0.0240729	gang	gang1	S	S	0	3	2	stra_fore	1.17		1098	11	75	R0	RLO	L	750	c	1	3	1	outer_fore	outer_hind	1.44	8.66025			1098	12	30	U0	URO	R	517	c	0	1	8	inner_fore	inner_hind	1.19	5.47723				1098	11
1099	2	0.0285913	gang	gang1	S	S	0	3	2	stra_fore	1.16		1099	11	86	R0	RLO	L	760	c	1	3	1	outer_fore	outer_hind	1.33	9.27362			1099	12	13	U0	URO	R	518	c	0	1	8	inner_fore	inner_hind	1.22	3.60555				1099	11
1100	2	0.0217817	gang	gang1	S	S	0	3	2	stra_fore	1.18		1100	12	77	R0	RLO	L	769	c	1	1	8	outer_fore	outer_hind	1.08	8.77496			1100	12	28	U0	URO	R	519	c	0	1	8	inner_fore	inner_hind	1.18	5.2915				1100	12
1101	2	0.0174109	gang	gang1	S	S	0	3	2	stra_fore	1.44		1101	12	63	R0	RLO	L	770	c	1	1	8	outer_fore	outer_hind	1.1	7.93725			1101	12	28	U0	URO	R	520	c	0	1	8	inner_fore	inner_hind	1.17	5.2915				1101	12
1102	2	0.0214823	gang	gang1	S	S	0	3	2	stra_fore	1.32		1102	12	64	R0	RLO	L	771	c	1	1	8	outer_fore	outer_hind	1.09	8			1102	12	25	U0	URO	R	521	c	0	1	8	inner_fore	inner_hind	1.19	5				1102	12
1103	3	0.0222248	gang	gang1	S	S	0	2	3	stra_fore	1.31		1103	12	68	R0	RLO	L	772	c	1	1	8	outer_fore	outer_hind	1.1	8.24621			1103	12	26	U0	URO	R	522	c	0	1	8	inner_fore	inner_hind	1.25	5.09902				1103	12
1104	3	0.0219038	gang	gang1	S	S	0	2	3	stra_fore	1.25		1104	12	68	R0	RLO	L	773	c	1	1	8	outer_fore	outer_hind	1.09	8.24621			1104	14	24	U0	URO	R	541	c	0	1	9	inner_fore	inner_hind	1.25	4.89898				1104	12
1105	3	0.0244056	gang	gang1	S	S	0	2	3	stra_fore	1.3		1105	12	63	R0	RLO	L	775	c	1	1	8	outer_fore	outer_hind	1.11	7.93725			1105	15	13	U0	URO	R	552	c	0	3	10	inner_fore	inner_hind	1.16	3.60555				1105	12
1106	3	0.0195814	gang	gang1	S	S	0	2	3	stra_fore	1.29		1106	15	62	R0	RLO	L	795	c	1	3	10	outer_fore	outer_hind	1.13	7.87401			1106	15	20	U0	URO	R	553	c	0	3	10	inner_fore	inner_hind	1.2	4.47214				1106	15
1107	3	0.0301468	gang	gang1	S	S	0	2	3	stra_fore	1.24		1107	15	61	R0	RLO	L	796	c	1	3	10	outer_fore	outer_hind	1.15	7.81025			1107	15	19	U0	URO	R	554	c	0	3	10	inner_fore	inner_hind	1.14	4.3589				1107	15
1108	5	0.0145082	gang	gang1	S	S	0	4	5	stra_fore	1.22		1108	15	65	R0	RLO	L	797	c	1	3	10	outer_fore	outer_hind	1.2	8.06226			1108	15	20	U0	URO	R	555	c	0	3	10	inner_fore	inner_hind	1.14	4.47214				1108	15
1109	5	0.013925	gang	gang1	S	S	0	4	5	stra_fore	1.25		1109	15	72	R0	RLO	L	799	c	1	3	10	outer_fore	outer_hind	1.19	8.48528			1109	15	29	U0	URO	R	556	c	0	3	10	inner_fore	inner_hind	1.16	5.38516				1109	15
1110	5	0.0222657	gang	gang1	S	S	0	4	5	stra_fore	1.24		1110	15	68	R0	RLO	L	800	c	1	3	10	outer_fore	outer_hind	1.28	8.24621			1110	15	30	U0	URO	R	558	c	0	3	10	inner_fore	inner_hind	1.16	5.47723				1110	15
1111	5	0.0151907	gang	gang1	S	S	0	4	5	stra_fore	1.24		1111	15	69	R0	RLO	L	801	c	1	3	10	outer_fore	outer_hind	1.26	8.30662			1111	15	18	U0	URO	R	559	c	0	3	10	inner_fore	inner_hind	1.14	4.24264				1111	15
1112	5	0.00972972	gang	gang1	S	S	0	4	5	stra_fore	1.25		1112	17	94	R0	RLO	L	845	c	1	1	2	outer_fore	outer_hind	1.17	9.69536			1112	15	25	U0	URO	R	560	c	0	3	10	inner_fore	inner_hind	1.18	5				1112	17
1113	7	0.0330077	gang	gang1	S	S	0	1	6	stra_fore	0.96		1113	17	85	R0	RLO	L	847	c	1	1	2	outer_fore	outer_hind	1.21	9.21954			1113	15	19	U0	URO	R	561	c	0	3	10	inner_fore	inner_hind	1.12	4.3589				1113	17
1114	7	0.0231796	gang	gang1	S	S	0	1	6	stra_fore	1.11		1114	2	94	R0	RRO	R	874	c	1	3	2	inner_fore	inner_hind	1.36	9.69536			1114	15	14	U0	URO	R	562	c	0	3	10	inner_fore	inner_hind	1.2	3.74166				1114	2
1115	7	0.0221868	gang	gang1	S	S	0	1	6	stra_fore	1.12		1115	2	82	R0	RRO	R	875	c	1	3	2	inner_fore	inner_hind	1.51	9.05539			1115	15	27	U0	URO	R	563	c	0	3	10	inner_fore	inner_hind	1.22	5.19615				1115	2
1116	8	0.0105437	gang	gang1	S	S	0	5	5	stra_fore	1.18		1116	2	84	R0	RRO	R	876	c	1	3	2	inner_fore	inner_hind	1.53	9.16515			1116	17	31	U0	URO	R	587	c	0	1	2	inner_fore	inner_hind	1.23	5.56776				1116	2
1117	8	0.0142823	gang	gang1	S	S	0	5	5	stra_fore	1.16		1117	2	84	R0	RRO	R	878	c	1	3	2	inner_fore	inner_hind	1.45	9.16515			1117	17	29	U0	URO	R	588	c	0	1	2	inner_fore	inner_hind	1.21	5.38516				1117	2
1118	8	0.0131963	gang	gang1	S	S	0	5	5	stra_fore	1.12		1118	2	86	R0	RRO	R	880	c	1	3	2	inner_fore	inner_hind	1.39	9.27362			1118	17	26	U0	URO	R	589	c	0	1	2	inner_fore	inner_hind	1.2	5.09902				1118	2
1119	8	0.0137232	gang	gang1	S	S	0	5	5	stra_fore	1.15		1119	2	80	R0	RRO	R	881	c	1	3	2	inner_fore	inner_hind	1.42	8.94427			1119	17	21	U0	URO	R	590	c	0	1	2	inner_fore	inner_hind	1.28	4.58258				1119	2
1120	8	0.0125997	gang	gang1	S	S	0	5	5	stra_fore	1.16		1120	2	88	R0	RRO	R	882	c	1	3	2	inner_fore	inner_hind	1.42	9.38083			1120	17	31	U0	URO	R	591	c	0	1	2	inner_fore	inner_hind	1.11	5.56776				1120	2
1121	8	0.0165748	gang	gang1	S	S	0	5	5	stra_fore	1.23		1121	2	83	R0	RRO	R	883	c	1	3	2	inner_fore	inner_hind	1.46	9.11043			1121	17	32	U0	URO	R	592	c	0	1	2	inner_fore	inner_hind	1.25	5.65685				1121	2
1122	8	0.0162293	gang	gang1	S	S	0	5	5	stra_fore	1.16		1122	2	82	R0	RRO	R	884	c	1	3	2	inner_fore	inner_hind	1.42	9.05539			1122	17	29	U0	URO	R	593	c	0	1	2	inner_fore	inner_hind	1.22	5.38516				1122	2
1123	8	0.0120607	gang	gang1	S	S	0	5	5	stra_fore	1.18		1123	2	88	R0	RRO	R	885	c	1	3	2	inner_fore	inner_hind	1.39	9.38083			1123	17	28	U0	URO	R	594	c	0	1	2	inner_fore	inner_hind	1.21	5.2915				1123	2
1124	8	0.0130675	gang	gang1	S	S	0	5	5	stra_fore	1.17		1124	2	74	R0	RRO	R	887	c	1	3	2	inner_fore	inner_hind	1.44	8.60233			1124	17	29	U0	URO	R	595	c	0	1	2	inner_fore	inner_hind	1.25	5.38516				1124	2
1125	8	0.0179116	gang	gang1	S	S	0	5	5	stra_fore	1.17		1125	2	87	R0	RRO	R	888	c	1	3	2	inner_fore	inner_hind	1.44	9.32738			1125	17	23	U0	URO	R	598	c	0	1	2	inner_fore	inner_hind	1.26	4.79583				1125	2
1126	8	0.0127944	gang	gang1	S	S	0	5	5	stra_fore	1.14		1126	2	81	R0	RRO	R	889	c	1	3	2	inner_fore	inner_hind	1.47	9			1126	17	24	U0	URO	R	599	c	0	1	2	inner_fore	inner_hind	1.28	4.89898				1126	2
1127	8	0.0142107	gang	gang1	S	S	0	5	5	stra_fore	1.21		1127	2	82	R0	RRO	R	890	c	1	3	2	inner_fore	inner_hind	1.56	9.05539			1127	17	26	U0	URO	R	600	c	0	1	2	inner_fore	inner_hind	1.22	5.09902				1127	2
1128	9	0.0179155	gang	gang1	S	S	0	3	6	stra_fore	1.15		1128	3	76	R0	RRO	R	891	c	1	2	3	inner_fore	inner_hind	1.36	8.7178			1128	17	24	U0	URO	R	602	c	0	1	2	inner_fore	inner_hind	1.25	4.89898				1128	3
1129	9	0.010443	gang	gang1	S	S	0	3	6	stra_fore	1.07		1129	3	75	R0	RRO	R	892	c	1	2	3	inner_fore	inner_hind	1.43	8.66025			1129	17	25	U0	URO	R	603	c	0	1	2	inner_fore	inner_hind	1.18	5				1129	3
1130	9	0.0222136	gang	gang1	S	S	0	3	6	stra_fore	1.15		1130	3	78	R0	RRO	R	894	c	1	2	3	inner_fore	inner_hind	1.47	8.83176			1130	1	32	R0	RLO	L	650	c	1	1	1	outer_fore	outer_hind	1.33	5.65685				1130	3
1131	9	0.0234663	gang	gang1	S	S	0	3	6	stra_fore	1.11		1131	3	76	R0	RRO	R	895	c	1	2	3	inner_fore	inner_hind	1.38	8.7178			1131	2	23	R0	RLO	L	653	c	1	3	2	outer_fore	outer_hind	1.4	4.79583				1131	3
1132	9	0.0168627	gang	gang1	S	S	0	3	6	stra_fore	1.11		1132	3	74	R0	RRO	R	896	c	1	2	3	inner_fore	inner_hind	1.32	8.60233			1132	2	20	R0	RLO	L	654	c	1	3	2	outer_fore	outer_hind	1.36	4.47214				1132	3
1133	9	0.0155175	gang	gang1	S	S	0	3	6	stra_fore	1.07		1133	3	77	R0	RRO	R	897	c	1	2	3	inner_fore	inner_hind	1.36	8.77496			1133	2	19	R0	RLO	L	655	c	1	3	2	outer_fore	outer_hind	1.39	4.3589				1133	3
1134	9	0.0174534	gang	gang1	S	S	0	3	6	stra_fore	1.08		1134	3	75	R0	RRO	R	898	c	1	2	3	inner_fore	inner_hind	1.37	8.66025			1134	2	23	R0	RLO	L	656	c	1	3	2	outer_fore	outer_hind	1.39	4.79583				1134	3
1135	9	0.0124786	gang	gang1	S	S	0	3	6	stra_fore	1.14		1135	3	79	R0	RRO	R	899	c	1	2	3	inner_fore	inner_hind	1.41	8.88819			1135	3	34	R0	RLO	L	659	c	1	2	3	outer_fore	outer_hind	1.55	5.83095				1135	3
1136	9	0.0194421	gang	gang1	S	S	0	3	6	stra_fore	1.17		1136	3	80	R0	RRO	R	900	c	1	2	3	inner_fore	inner_hind	1.42	8.94427			1136	7	24	R0	RLO	L	681	c	1	1	6	outer_fore	outer_hind	1.25	4.89898				1136	3
1137	9	0.0189571	gang	gang1	S	S	0	3	6	stra_fore	1.12		1137	3	78	R0	RRO	R	902	c	1	2	3	inner_fore	inner_hind	1.38	8.83176			1137	7	27	R0	RLO	L	682	c	1	1	6	outer_fore	outer_hind	1.25	5.19615				1137	3
1138	9	0.01678	gang	gang1	S	S	0	3	6	stra_fore	1.14		1138	5	71	R0	RRO	R	914	c	1	4	5	inner_fore	inner_hind	1.28	8.42615			1138	7	22	R0	RLO	L	683	c	1	1	6	outer_fore	outer_hind	1.28	4.69042				1138	5
1139	9	0.0239899	gang	gang1	S	S	0	3	6	stra_fore	1.12		1139	7	87	R0	RRO	R	931	c	1	1	6	inner_fore	inner_hind	1.26	9.32738			1139	8	27	R0	RLO	L	684	c	1	5	5	outer_fore	outer_hind	1.36	5.19615				1139	7
1140	10	0.0272359	gang	gang1	S	S	0	5	7	stra_fore	1.26		1140	7	85	R0	RRO	R	932	c	1	1	6	inner_fore	inner_hind	1.24	9.21954			1140	8	24	R0	RLO	L	686	c	1	5	5	outer_fore	outer_hind	1.35	4.89898				1140	7
1141	10	0.0157893	gang	gang1	S	S	0	5	7	stra_fore	1.23		1141	7	85	R0	RRO	R	933	c	1	1	6	inner_fore	inner_hind	1.25	9.21954			1141	8	27	R0	RLO	L	688	c	1	5	5	outer_fore	outer_hind	1.19	5.19615				1141	7
1142	10	0.015257	gang	gang1	S	S	0	5	7	stra_fore	1.28		1142	7	87	R0	RRO	R	936	c	1	1	6	inner_fore	inner_hind	1.31	9.32738			1142	8	26	R0	RLO	L	689	c	1	5	5	outer_fore	outer_hind	1.32	5.09902				1142	7
1143	10	0.0213375	gang	gang1	S	S	0	5	7	stra_fore	1.34		1143	8	79	R0	RRO	R	938	c	1	5	5	inner_fore	inner_hind	1.25	8.88819			1143	8	20	R0	RLO	L	692	c	1	5	5	outer_fore	outer_hind	1.29	4.47214				1143	8
1144	10	0.0103639	gang	gang1	S	S	0	5	7	stra_fore	1.3		1144	8	92	R0	RRO	R	939	c	1	5	5	inner_fore	inner_hind	1.22	9.59166			1144	8	25	R0	RLO	L	693	c	1	5	5	outer_fore	outer_hind	1.27	5				1144	8
1145	11	0.0204155	gang	gang1	S	S	0	3	1	stra_fore	1.17		1145	8	82	R0	RRO	R	942	c	1	5	5	inner_fore	inner_hind	1.28	9.05539			1145	8	22	R0	RLO	L	696	c	1	5	5	outer_fore	outer_hind	1.19	4.69042				1145	8
1146	11	0.0112124	gang	gang1	S	S	0	3	1	stra_fore	1.18		1146	8	84	R0	RRO	R	943	c	1	5	5	inner_fore	inner_hind	1.26	9.16515			1146	8	24	R0	RLO	L	698	c	1	5	5	outer_fore	outer_hind	1.14	4.89898				1146	8
1147	11	0.010229	gang	gang1	S	S	0	3	1	stra_fore	1.17		1147	8	88	R0	RRO	R	944	c	1	5	5	inner_fore	inner_hind	1.29	9.38083			1147	8	26	R0	RLO	L	701	c	1	5	5	outer_fore	outer_hind	1.25	5.09902				1147	8
1148	11	0.0131192	gang	gang1	S	S	0	3	1	stra_fore	1.12		1148	8	66	R0	RRO	R	945	c	1	5	5	inner_fore	inner_hind	1.33	8.12404			1148	8	28	R0	RLO	L	702	c	1	5	5	outer_fore	outer_hind	1.21	5.2915				1148	8
1149	11	0.0138815	gang	gang1	S	S	0	3	1	stra_fore	1.12		1149	8	92	R0	RRO	R	949	c	1	5	5	inner_fore	inner_hind	1.23	9.59166			1149	8	21	R0	RLO	L	712	c	1	5	5	outer_fore	outer_hind	1.25	4.58258				1149	8
1150	11	0.0114065	gang	gang1	S	S	0	3	1	stra_fore	1.17		1150	8	90	R0	RRO	R	950	c	1	5	5	inner_fore	inner_hind	1.31	9.48683			1150	8	22	R0	RLO	L	714	c	1	5	5	outer_fore	outer_hind	1.26	4.69042				1150	8
1151	11	0.0135276	gang	gang1	S	S	0	3	1	stra_fore	1.16		1151	8	77	R0	RRO	R	951	c	1	5	5	inner_fore	inner_hind	1.35	8.77496			1151	8	25	R0	RLO	L	715	c	1	5	5	outer_fore	outer_hind	1.24	5				1151	8
1152	12	0.0168456	gang	gang1	S	S	0	1	8	stra_fore	1.02		1152	8	90	R0	RRO	R	952	c	1	5	5	inner_fore	inner_hind	1.36	9.48683			1152	8	17	R0	RLO	L	717	c	1	5	5	outer_fore	outer_hind	1.31	4.12311				1152	8
1153	12	0.0262287	gang	gang1	S	S	0	1	8	stra_fore	1.18		1153	8	78	R0	RRO	R	953	c	1	5	5	inner_fore	inner_hind	1.4	8.83176			1153	9	22	R0	RLO	L	718	c	1	3	6	outer_fore	outer_hind	1.21	4.69042				1153	8
1154	12	0.0272391	gang	gang1	S	S	0	1	8	stra_fore	1.15		1154	9	94	R0	RRO	R	962	c	1	3	6	inner_fore	inner_hind	1.21	9.69536			1154	9	25	R0	RLO	L	719	c	1	3	6	outer_fore	outer_hind	1.19	5				1154	9
1155	12	0.0235392	gang	gang1	S	S	0	1	8	stra_fore	1.16		1155	9	78	R0	RRO	R	969	c	1	3	6	inner_fore	inner_hind	1.16	8.83176			1155	9	21	R0	RLO	L	720	c	1	3	6	outer_fore	outer_hind	1.27	4.58258				1155	9
1156	12	0.0225902	gang	gang1	S	S	0	1	8	stra_fore	1.19		1156	9	91	R0	RRO	R	970	c	1	3	6	inner_fore	inner_hind	1.15	9.53939			1156	9	23	R0	RLO	L	721	c	1	3	6	outer_fore	outer_hind	1.2	4.79583				1156	9
1157	14	0.0120631	gang	gang1	S	S	0	1	9	stra_fore	1.2		1157	9	77	R0	RRO	R	972	c	1	3	6	inner_fore	inner_hind	1.23	8.77496			1157	9	23	R0	RLO	L	722	c	1	3	6	outer_fore	outer_hind	1.21	4.79583				1157	9
1158	14	0.0129508	gang	gang1	S	S	0	1	9	stra_fore	1.21		1158	9	91	R0	RRO	R	973	c	1	3	6	inner_fore	inner_hind	1.19	9.53939			1158	9	24	R0	RLO	L	723	c	1	3	6	outer_fore	outer_hind	1.21	4.89898				1158	9
1159	14	0.0119229	gang	gang1	S	S	0	1	9	stra_fore	1.19		1159	9	94	R0	RRO	R	974	c	1	3	6	inner_fore	inner_hind	1.17	9.69536			1159	9	24	R0	RLO	L	724	c	1	3	6	outer_fore	outer_hind	1.23	4.89898				1159	9
1160	14	0.00991756	gang	gang1	S	S	0	1	9	stra_fore	1.19		1160	10	73	R0	RRO	R	977	c	1	5	7	inner_fore	inner_hind	1.31	8.544			1160	9	28	R0	RLO	L	725	c	1	3	6	outer_fore	outer_hind	1.21	5.2915				1160	10
1161	14	0.0209251	gang	gang1	S	S	0	1	9	stra_fore	1.21		1161	10	74	R0	RRO	R	978	c	1	5	7	inner_fore	inner_hind	1.32	8.60233			1161	9	24	R0	RLO	L	726	c	1	3	6	outer_fore	outer_hind	1.2	4.89898				1161	10
1162	15	0.0224765	gang	gang1	S	S	0	3	10	stra_fore	1.19		1162	10	76	R0	RRO	R	979	c	1	5	7	inner_fore	inner_hind	1.28	8.7178			1162	9	15	R0	RLO	L	727	c	1	3	6	outer_fore	outer_hind	1.25	3.87298				1162	10
1163	15	0.0325947	gang	gang1	S	S	0	3	10	stra_fore	1.2		1163	10	77	R0	RRO	R	980	c	1	5	7	inner_fore	inner_hind	1.28	8.77496			1163	9	24	R0	RLO	L	728	c	1	3	6	outer_fore	outer_hind	1.18	4.89898				1163	10
1164	15	0.032966	gang	gang1	S	S	0	3	10	stra_fore	1.19		1164	10	74	R0	RRO	R	981	c	1	5	7	inner_fore	inner_hind	1.29	8.60233			1164	9	21	R0	RLO	L	729	c	1	3	6	outer_fore	outer_hind	1.19	4.58258				1164	10
1165	15	0.0374185	gang	gang1	S	S	0	3	10	stra_fore	1.23		1165	10	67	R0	RRO	R	982	c	1	5	7	inner_fore	inner_hind	1.27	8.18535			1165	9	20	R0	RLO	L	730	c	1	3	6	outer_fore	outer_hind	1.22	4.47214				1165	10
1166	15	0.0305452	gang	gang1	S	S	0	3	10	stra_fore	1.16		1166	10	75	R0	RRO	R	985	c	1	5	7	inner_fore	inner_hind	1.31	8.66025			1166	9	24	R0	RLO	L	731	c	1	3	6	outer_fore	outer_hind	1.21	4.89898				1166	10
1167	15	0.036088	gang	gang1	S	S	0	3	10	stra_fore	1.18		1167	10	94	R0	RRO	R	986	c	1	5	7	inner_fore	inner_hind	1.28	9.69536			1167	9	22	R0	RLO	L	732	c	1	3	6	outer_fore	outer_hind	1.24	4.69042				1167	10
1168	15	0.035165	gang	gang1	S	S	0	3	10	stra_fore	1.17		1168	12	70	R0	RRO	R	995	c	1	1	8	inner_fore	inner_hind	1.1	8.3666			1168	9	21	R0	RLO	L	733	c	1	3	6	outer_fore	outer_hind	1.26	4.58258				1168	12
1169	15	0.0278687	gang	gang1	S	S	0	3	10	stra_fore	1.17		1169	12	69	R0	RRO	R	996	c	1	1	8	inner_fore	inner_hind	1.11	8.30662			1169	9	24	R0	RLO	L	734	c	1	3	6	outer_fore	outer_hind	1.26	4.89898				1169	12
1170	15	0.0312451	gang	gang1	S	S	0	3	10	stra_fore	1.13		1170	12	65	R0	RRO	R	997	c	1	1	8	inner_fore	inner_hind	1.11	8.06226			1170	9	49	R0	RLO	L	735	c	1	3	6	outer_fore	outer_hind	1.27	7				1170	12
1171	15	0.0345815	gang	gang1	S	S	0	3	10	stra_fore	1.19		1171	12	69	R0	RRO	R	998	c	1	1	8	inner_fore	inner_hind	1.11	8.30662			1171	10	31	R0	RLO	L	743	c	1	5	7	outer_fore	outer_hind	1.19	5.56776				1171	12
1172	15	0.0299792	gang	gang1	S	S	0	3	10	stra_fore	1.21		1172	12	66	R0	RRO	R	999	c	1	1	8	inner_fore	inner_hind	1.14	8.12404			1172	10	25	R0	RLO	L	747	c	1	5	7	outer_fore	outer_hind	1.36	5				1172	12
1173	15	0.0202606	gang	gang1	S	S	0	3	10	stra_fore	1.23		1173	12	70	R0	RRO	R	1000	c	1	1	8	inner_fore	inner_hind	1.07	8.3666			1173	11	25	R0	RLO	L	760	c	1	3	1	outer_fore	outer_hind	1.33	5				1173	12
1174	17	0.0127929	gang	gang1	S	S	0	1	2	stra_fore	1.21		1174	12	70	R0	RRO	R	1001	c	1	1	8	inner_fore	inner_hind	1.1	8.3666			1174	12	26	R0	RLO	L	770	c	1	1	8	outer_fore	outer_hind	1.1	5.09902				1174	12
1175	17	0.0160019	gang	gang1	S	S	0	1	2	stra_fore	1.2		1175	12	71	R0	RRO	R	1002	c	1	1	8	inner_fore	inner_hind	1.13	8.42615			1175	12	26	R0	RLO	L	771	c	1	1	8	outer_fore	outer_hind	1.09	5.09902				1175	12
1176	17	0.0220153	gang	gang1	S	S	0	1	2	stra_fore	1.17		1176	12	65	R0	RRO	R	1003	c	1	1	8	inner_fore	inner_hind	1.1	8.06226			1176	12	14	R0	RLO	L	772	c	1	1	8	outer_fore	outer_hind	1.1	3.74166				1176	12
1177	17	0.0155693	gang	gang1	S	S	0	1	2	stra_fore	1.18		1177	12	65	R0	RRO	R	1004	c	1	1	8	inner_fore	inner_hind	1.13	8.06226			1177	12	28	R0	RLO	L	773	c	1	1	8	outer_fore	outer_hind	1.09	5.2915				1177	12
1178	17	0.0149738	gang	gang1	S	S	0	1	2	stra_fore	1.19		1178	12	75	R0	RRO	R	1005	c	1	1	8	inner_fore	inner_hind	1.14	8.66025			1178	12	24	R0	RLO	L	775	c	1	1	8	outer_fore	outer_hind	1.11	4.89898				1178	12
1179	17	0.0175656	gang	gang1	S	S	0	1	2	stra_fore	1.22		1179	12	64	R0	RRO	R	1006	c	1	1	8	inner_fore	inner_hind	1.16	8			1179	14	23	R0	RLO	L	792	c	1	1	9	outer_fore	outer_hind	1.03	4.79583				1179	12
1180	17	0.0222647	gang	gang1	S	S	0	1	2	stra_fore	1.25		1180	12	67	R0	RRO	R	1007	c	1	1	8	inner_fore	inner_hind	1.16	8.18535			1180	15	20	R0	RLO	L	795	c	1	3	10	outer_fore	outer_hind	1.13	4.47214				1180	12
													1181	12	68	R0	RRO	R	1008	c	1	1	8	inner_fore	inner_hind	1.08	8.24621			1181	15	18	R0	RLO	L	797	c	1	3	10	outer_fore	outer_hind	1.2	4.24264				1181	12
													1182	12	64	R0	RRO	R	1009	c	1	1	8	inner_fore	inner_hind	1.15	8			1182	15	19	R0	RLO	L	802	c	1	3	10	outer_fore	outer_hind	1.27	4.3589				1182	12
													1183	12	62	R0	RRO	R	1010	c	1	1	8	inner_fore	inner_hind	1.13	7.87401			1183	17	21	R0	RLO	L	833	c	1	1	2	outer_fore	outer_hind	1.12	4.58258				1183	12
													1184	12	64	R0	RRO	R	1011	c	1	1	8	inner_fore	inner_hind	1.14	8			1184	17	22	R0	RLO	L	834	c	1	1	2	outer_fore	outer_hind	1.18	4.69042				1184	12
													1185	15	87	R0	RRO	R	1065	c	1	3	10	inner_fore	inner_hind	1.16	9.32738			1185	17	20	R0	RLO	L	835	c	1	1	2	outer_fore	outer_hind	1.16	4.47214				1185	15
													1186	15	85	R0	RRO	R	1066	c	1	3	10	inner_fore	inner_hind	1.23	9.21954			1186	17	17	R0	RLO	L	836	c	1	1	2	outer_fore	outer_hind	1.17	4.12311				1186	15
													1187	15	83	R0	RRO	R	1068	c	1	3	10	inner_fore	inner_hind	1.26	9.11043			1187	17	18	R0	RLO	L	838	c	1	1	2	outer_fore	outer_hind	1.15	4.24264				1187	15
													1188	15	93	R0	RRO	R	1069	c	1	3	10	inner_fore	inner_hind	1.22	9.64365			1188	17	17	R0	RLO	L	841	c	1	1	2	outer_fore	outer_hind	1.19	4.12311				1188	15
													1189	15	84	R0	RRO	R	1072	c	1	3	10	inner_fore	inner_hind	1.18	9.16515			1189	17	18	R0	RLO	L	842	c	1	1	2	outer_fore	outer_hind	1.14	4.24264				1189	15
													1190	15	88	R0	RRO	R	1073	c	1	3	10	inner_fore	inner_hind	1.18	9.38083			1190	17	18	R0	RLO	L	843	c	1	1	2	outer_fore	outer_hind	1.14	4.24264				1190	15
													1191	15	86	R0	RRO	R	1075	c	1	3	10	inner_fore	inner_hind	1.21	9.27362			1191	17	22	R0	RLO	L	845	c	1	1	2	outer_fore	outer_hind	1.17	4.69042				1191	15
													1192	17	94	R0	RRO	R	1128	c	1	1	2	inner_fore	inner_hind	1.21	9.69536			1192	17	18	R0	RLO	L	847	c	1	1	2	outer_fore	outer_hind	1.21	4.24264				1192	17
													1193	1	78	gang	gang	S	3182	S	0	1	1	stra_fore	stra_hind	1.46	8.83176			1193	17	14	R0	RLO	L	848	c	1	1	2	outer_fore	outer_hind	1.22	3.74166				1193	1
													1194	1	73	gang	gang	S	3183	S	0	1	1	stra_fore	stra_hind	1.43	8.544			1194	1	42	R0	RRO	R	870	c	1	1	1	inner_fore	inner_hind	1.38	6.48074				1194	1
													1195	1	65	gang	gang	S	3185	S	0	1	1	stra_fore	stra_hind	1.15	8.06226			1195	1	41	R0	RRO	R	873	c	1	1	1	inner_fore	inner_hind	1.23	6.40312				1195	1
													1196	1	62	gang	gang	S	3186	S	0	1	1	stra_fore	stra_hind	1.07	7.87401			1196	3	46	R0	RRO	R	891	c	1	2	3	inner_fore	inner_hind	1.36	6.78233				1196	1
													1197	1	69	gang	gang	S	3187	S	0	1	1	stra_fore	stra_hind	1.17	8.30662			1197	3	31	R0	RRO	R	892	c	1	2	3	inner_fore	inner_hind	1.43	5.56776				1197	1
													1198	1	68	gang	gang	S	3188	S	0	1	1	stra_fore	stra_hind	1.15	8.24621			1198	3	49	R0	RRO	R	894	c	1	2	3	inner_fore	inner_hind	1.47	7				1198	1
													1199	1	68	gang	gang	S	3189	S	0	1	1	stra_fore	stra_hind	1.15	8.24621			1199	3	45	R0	RRO	R	895	c	1	2	3	inner_fore	inner_hind	1.38	6.7082				1199	1
													1200	1	70	gang	gang	S	3191	S	0	1	1	stra_fore	stra_hind	1.15	8.3666			1200	3	45	R0	RRO	R	896	c	1	2	3	inner_fore	inner_hind	1.32	6.7082				1200	1
													1201	1	73	gang	gang	S	3192	S	0	1	1	stra_fore	stra_hind	1.14	8.544			1201	3	29	R0	RRO	R	897	c	1	2	3	inner_fore	inner_hind	1.36	5.38516				1201	1
													1202	1	71	gang	gang	S	3193	S	0	1	1	stra_fore	stra_hind	1.2	8.42615			1202	3	42	R0	RRO	R	898	c	1	2	3	inner_fore	inner_hind	1.37	6.48074				1202	1
													1203	1	73	gang	gang	S	3194	S	0	1	1	stra_fore	stra_hind	1.13	8.544			1203	3	48	R0	RRO	R	899	c	1	2	3	inner_fore	inner_hind	1.41	6.9282				1203	1
													1204	1	70	gang	gang	S	3196	S	0	1	1	stra_fore	stra_hind	1.17	8.3666			1204	7	15	R0	RRO	R	928	c	1	1	6	inner_fore	inner_hind	1.25	3.87298				1204	1
													1205	2	83	gang	gang	S	3197	S	0	3	2	stra_fore	stra_hind	1.29	9.11043			1205	7	16	R0	RRO	R	931	c	1	1	6	inner_fore	inner_hind	1.26	4				1205	2
													1206	2	83	gang	gang	S	3198	S	0	3	2	stra_fore	stra_hind	1.21	9.11043			1206	7	22	R0	RRO	R	932	c	1	1	6	inner_fore	inner_hind	1.24	4.69042				1206	2
													1207	2	84	gang	gang	S	3199	S	0	3	2	stra_fore	stra_hind	1.18	9.16515			1207	7	48	R0	RRO	R	933	c	1	1	6	inner_fore	inner_hind	1.25	6.9282				1207	2
													1208	2	83	gang	gang	S	3200	S	0	3	2	stra_fore	stra_hind	1.23	9.11043			1208	8	46	R0	RRO	R	938	c	1	5	5	inner_fore	inner_hind	1.25	6.78233				1208	2
													1209	2	84	gang	gang	S	3201	S	0	3	2	stra_fore	stra_hind	1.21	9.16515			1209	8	47	R0	RRO	R	939	c	1	5	5	inner_fore	inner_hind	1.22	6.85565				1209	2
													1210	2	77	gang	gang	S	3202	S	0	3	2	stra_fore	stra_hind	1.25	8.77496			1210	8	22	R0	RRO	R	940	c	1	5	5	inner_fore	inner_hind	1.14	4.69042				1210	2
													1211	2	79	gang	gang	S	3203	S	0	3	2	stra_fore	stra_hind	1.23	8.88819			1211	8	49	R0	RRO	R	942	c	1	5	5	inner_fore	inner_hind	1.28	7				1211	2
													1212	2	82	gang	gang	S	3206	S	0	3	2	stra_fore	stra_hind	1.23	9.05539			1212	8	49	R0	RRO	R	943	c	1	5	5	inner_fore	inner_hind	1.26	7				1212	2
													1213	3	84	gang	gang	S	3207	S	0	2	3	stra_fore	stra_hind	1.24	9.16515			1213	8	47	R0	RRO	R	948	c	1	5	5	inner_fore	inner_hind	1.3	6.85565				1213	3
													1214	3	83	gang	gang	S	3208	S	0	2	3	stra_fore	stra_hind	1.25	9.11043			1214	9	23	R0	RRO	R	955	c	1	3	6	inner_fore	inner_hind	1.18	4.79583				1214	3
													1215	3	75	gang	gang	S	3210	S	0	2	3	stra_fore	stra_hind	1.32	8.66025			1215	9	23	R0	RRO	R	956	c	1	3	6	inner_fore	inner_hind	1.15	4.79583				1215	3
													1216	3	75	gang	gang	S	3211	S	0	2	3	stra_fore	stra_hind	1.33	8.66025			1216	9	49	R0	RRO	R	963	c	1	3	6	inner_fore	inner_hind	1.12	7				1216	3
													1217	3	77	gang	gang	S	3212	S	0	2	3	stra_fore	stra_hind	1.35	8.77496			1217	9	47	R0	RRO	R	965	c	1	3	6	inner_fore	inner_hind	1.14	6.85565				1217	3
													1218	3	76	gang	gang	S	3213	S	0	2	3	stra_fore	stra_hind	1.3	8.7178			1218	9	25	R0	RRO	R	966	c	1	3	6	inner_fore	inner_hind	1.15	5				1218	3
													1219	3	79	gang	gang	S	3214	S	0	2	3	stra_fore	stra_hind	1.29	8.88819			1219	9	20	R0	RRO	R	968	c	1	3	6	inner_fore	inner_hind	1.16	4.47214				1219	3
													1220	3	82	gang	gang	S	3215	S	0	2	3	stra_fore	stra_hind	1.26	9.05539			1220	9	23	R0	RRO	R	969	c	1	3	6	inner_fore	inner_hind	1.16	4.79583				1220	3
													1221	5	68	gang	gang	S	3224	S	0	4	5	stra_fore	stra_hind	1.27	8.24621			1221	9	21	R0	RRO	R	970	c	1	3	6	inner_fore	inner_hind	1.15	4.58258				1221	5
													1222	5	71	gang	gang	S	3225	S	0	4	5	stra_fore	stra_hind	1.31	8.42615			1222	9	48	R0	RRO	R	972	c	1	3	6	inner_fore	inner_hind	1.23	6.9282				1222	5
													1223	5	68	gang	gang	S	3227	S	0	4	5	stra_fore	stra_hind	1.31	8.24621			1223	9	22	R0	RRO	R	973	c	1	3	6	inner_fore	inner_hind	1.19	4.69042				1223	5
													1224	5	68	gang	gang	S	3229	S	0	4	5	stra_fore	stra_hind	1.29	8.24621			1224	9	20	R0	RRO	R	974	c	1	3	6	inner_fore	inner_hind	1.17	4.47214				1224	5
													1225	7	78	gang	gang	S	3244	S	0	1	6	stra_fore	stra_hind	1.46	8.83176			1225	9	23	R0	RRO	R	975	c	1	3	6	inner_fore	inner_hind	1.15	4.79583				1225	7
													1226	7	73	gang	gang	S	3245	S	0	1	6	stra_fore	stra_hind	1.43	8.544			1226	9	27	R0	RRO	R	976	c	1	3	6	inner_fore	inner_hind	1.16	5.19615				1226	7
													1227	7	65	gang	gang	S	3247	S	0	1	6	stra_fore	stra_hind	1.15	8.06226			1227	10	28	R0	RRO	R	977	c	1	5	7	inner_fore	inner_hind	1.31	5.2915				1227	7
													1228	7	62	gang	gang	S	3248	S	0	1	6	stra_fore	stra_hind	1.07	7.87401			1228	10	26	R0	RRO	R	978	c	1	5	7	inner_fore	inner_hind	1.32	5.09902				1228	7
													1229	7	69	gang	gang	S	3249	S	0	1	6	stra_fore	stra_hind	1.17	8.30662			1229	10	29	R0	RRO	R	980	c	1	5	7	inner_fore	inner_hind	1.28	5.38516				1229	7
													1230	7	68	gang	gang	S	3250	S	0	1	6	stra_fore	stra_hind	1.15	8.24621			1230	10	25	R0	RRO	R	981	c	1	5	7	inner_fore	inner_hind	1.29	5				1230	7
													1231	7	68	gang	gang	S	3251	S	0	1	6	stra_fore	stra_hind	1.15	8.24621			1231	12	19	R0	RRO	R	995	c	1	1	8	inner_fore	inner_hind	1.1	4.3589				1231	7
													1232	7	70	gang	gang	S	3253	S	0	1	6	stra_fore	stra_hind	1.15	8.3666			1232	12	16	R0	RRO	R	996	c	1	1	8	inner_fore	inner_hind	1.11	4				1232	7
													1233	7	73	gang	gang	S	3254	S	0	1	6	stra_fore	stra_hind	1.14	8.544			1233	12	14	R0	RRO	R	997	c	1	1	8	inner_fore	inner_hind	1.11	3.74166				1233	7
													1234	7	71	gang	gang	S	3255	S	0	1	6	stra_fore	stra_hind	1.2	8.42615			1234	12	16	R0	RRO	R	998	c	1	1	8	inner_fore	inner_hind	1.11	4				1234	7
													1235	7	73	gang	gang	S	3256	S	0	1	6	stra_fore	stra_hind	1.13	8.544			1235	12	15	R0	RRO	R	999	c	1	1	8	inner_fore	inner_hind	1.14	3.87298				1235	7
													1236	7	70	gang	gang	S	3258	S	0	1	6	stra_fore	stra_hind	1.17	8.3666			1236	12	19	R0	RRO	R	1000	c	1	1	8	inner_fore	inner_hind	1.07	4.3589				1236	7
													1237	8	79	gang	gang	S	3259	S	0	5	5	stra_fore	stra_hind	1.15	8.88819			1237	12	21	R0	RRO	R	1001	c	1	1	8	inner_fore	inner_hind	1.1	4.58258				1237	8
													1238	8	76	gang	gang	S	3260	S	0	5	5	stra_fore	stra_hind	1.14	8.7178			1238	12	20	R0	RRO	R	1002	c	1	1	8	inner_fore	inner_hind	1.13	4.47214				1238	8
													1239	8	78	gang	gang	S	3262	S	0	5	5	stra_fore	stra_hind	1.21	8.83176			1239	12	18	R0	RRO	R	1003	c	1	1	8	inner_fore	inner_hind	1.1	4.24264				1239	8
													1240	8	79	gang	gang	S	3263	S	0	5	5	stra_fore	stra_hind	1.19	8.88819			1240	12	14	R0	RRO	R	1004	c	1	1	8	inner_fore	inner_hind	1.13	3.74166				1240	8
													1241	8	78	gang	gang	S	3264	S	0	5	5	stra_fore	stra_hind	1.22	8.83176			1241	12	16	R0	RRO	R	1005	c	1	1	8	inner_fore	inner_hind	1.14	4				1241	8
													1242	8	73	gang	gang	S	3265	S	0	5	5	stra_fore	stra_hind	1.23	8.544			1242	12	15	R0	RRO	R	1006	c	1	1	8	inner_fore	inner_hind	1.16	3.87298				1242	8
													1243	8	78	gang	gang	S	3266	S	0	5	5	stra_fore	stra_hind	1.2	8.83176			1243	12	20	R0	RRO	R	1008	c	1	1	8	inner_fore	inner_hind	1.08	4.47214				1243	8
													1244	8	76	gang	gang	S	3267	S	0	5	5	stra_fore	stra_hind	1.21	8.7178			1244	12	16	R0	RRO	R	1009	c	1	1	8	inner_fore	inner_hind	1.15	4				1244	8
													1245	8	77	gang	gang	S	3268	S	0	5	5	stra_fore	stra_hind	1.25	8.77496			1245	12	16	R0	RRO	R	1010	c	1	1	8	inner_fore	inner_hind	1.13	4				1245	8
													1246	8	77	gang	gang	S	3269	S	0	5	5	stra_fore	stra_hind	1.25	8.77496			1246	12	31	R0	RRO	R	1011	c	1	1	8	inner_fore	inner_hind	1.14	5.56776				1246	8
													1247	8	77	gang	gang	S	3270	S	0	5	5	stra_fore	stra_hind	1.25	8.77496			1247	14	16	R0	RRO	R	1040	c	1	1	9	inner_fore	inner_hind	1.11	4				1247	8
													1248	8	77	gang	gang	S	3271	S	0	5	5	stra_fore	stra_hind	1.25	8.77496			1248	14	18	R0	RRO	R	1050	c	1	1	9	inner_fore	inner_hind	1.03	4.24264				1248	8
													1249	9	78	gang	gang	S	3272	S	0	3	6	stra_fore	stra_hind	1.16	8.83176			1249	14	21	R0	RRO	R	1053	c	1	1	9	inner_fore	inner_hind	1.05	4.58258				1249	9
													1250	9	80	gang	gang	S	3273	S	0	3	6	stra_fore	stra_hind	1.07	8.94427			1250	14	21	R0	RRO	R	1055	c	1	1	9	inner_fore	inner_hind	1.03	4.58258				1250	9
													1251	9	84	gang	gang	S	3274	S	0	3	6	stra_fore	stra_hind	1.08	9.16515			1251	14	17	R0	RRO	R	1059	c	1	1	9	inner_fore	inner_hind	1.09	4.12311				1251	9
													1252	9	81	gang	gang	S	3275	S	0	3	6	stra_fore	stra_hind	1.1	9			1252	15	13	R0	RRO	R	1065	c	1	3	10	inner_fore	inner_hind	1.16	3.60555				1252	9
													1253	9	76	gang	gang	S	3276	S	0	3	6	stra_fore	stra_hind	1.09	8.7178			1253	15	13	R0	RRO	R	1066	c	1	3	10	inner_fore	inner_hind	1.23	3.60555				1253	9
													1254	10	69	gang	gang	S	3278	S	0	5	7	stra_fore	stra_hind	1.18	8.30662			1254	15	13	R0	RRO	R	1068	c	1	3	10	inner_fore	inner_hind	1.26	3.60555				1254	10
													1255	10	72	gang	gang	S	3280	S	0	5	7	stra_fore	stra_hind	1.19	8.48528			1255	15	11	R0	RRO	R	1070	c	1	3	10	inner_fore	inner_hind	1.21	3.31662				1255	10
													1256	10	72	gang	gang	S	3281	S	0	5	7	stra_fore	stra_hind	1.17	8.48528			1256	15	14	R0	RRO	R	1073	c	1	3	10	inner_fore	inner_hind	1.18	3.74166				1256	10
													1257	10	67	gang	gang	S	3282	S	0	5	7	stra_fore	stra_hind	1.22	8.18535			1257	15	13	R0	RRO	R	1075	c	1	3	10	inner_fore	inner_hind	1.21	3.60555				1257	10
													1258	10	72	gang	gang	S	3283	S	0	5	7	stra_fore	stra_hind	1.22	8.48528			1258	17	24	R0	RRO	R	1104	c	1	1	2	inner_fore	inner_hind	1.15	4.89898				1258	10
													1259	10	70	gang	gang	S	3284	S	0	5	7	stra_fore	stra_hind	1.26	8.3666			1259	17	29	R0	RRO	R	1106	c	1	1	2	inner_fore	inner_hind	1.16	5.38516				1259	10
													1260	10	69	gang	gang	S	3285	S	0	5	7	stra_fore	stra_hind	1.2	8.30662			1260	17	23	R0	RRO	R	1107	c	1	1	2	inner_fore	inner_hind	1.18	4.79583				1260	10
													1261	10	74	gang	gang	S	3286	S	0	5	7	stra_fore	stra_hind	1.25	8.60233			1261	17	29	R0	RRO	R	1108	c	1	1	2	inner_fore	inner_hind	1.18	5.38516				1261	10
													1262	10	70	gang	gang	S	3287	S	0	5	7	stra_fore	stra_hind	1.17	8.3666			1262	17	25	R0	RRO	R	1113	c	1	1	2	inner_fore	inner_hind	1.1	5				1262	10
													1263	11	73	gang	gang	S	3289	S	0	3	1	stra_fore	stra_hind	1.13	8.544			1263	17	30	R0	RRO	R	1119	c	1	1	2	inner_fore	inner_hind	1.17	5.47723				1263	11
													1264	11	77	gang	gang	S	3290	S	0	3	1	stra_fore	stra_hind	1.19	8.77496			1264	17	27	R0	RRO	R	1120	c	1	1	2	inner_fore	inner_hind	1.15	5.19615				1264	11
													1265	11	77	gang	gang	S	3291	S	0	3	1	stra_fore	stra_hind	1.16	8.77496			1265	17	27	R0	RRO	R	1122	c	1	1	2	inner_fore	inner_hind	1.21	5.19615				1265	11
													1266	11	77	gang	gang	S	3292	S	0	3	1	stra_fore	stra_hind	1.16	8.77496			1266	17	33	R0	RRO	R	1127	c	1	1	2	inner_fore	inner_hind	1.16	5.74456				1266	11
													1267	11	81	gang	gang	S	3293	S	0	3	1	stra_fore	stra_hind	1.18	9			1267	17	29	R0	RRO	R	1128	c	1	1	2	inner_fore	inner_hind	1.21	5.38516				1267	11
													1268	11	77	gang	gang	S	3296	S	0	3	1	stra_fore	stra_hind	1.18	8.77496			1268	17	28	R0	RRO	R	1129	c	1	1	2	inner_fore	inner_hind	1.21	5.2915				1268	11
													1269	11	75	gang	gang	S	3297	S	0	3	1	stra_fore	stra_hind	1.18	8.66025			1269	17	26	R0	RRO	R	1130	c	1	1	2	inner_fore	inner_hind	1.25	5.09902				1269	11
													1270	11	78	gang	gang	S	3298	S	0	3	1	stra_fore	stra_hind	1.18	8.83176			1270	17	32	R0	RRO	R	1133	c	1	1	2	inner_fore	inner_hind	1.21	5.65685				1270	11
													1271	11	84	gang	gang	S	3299	S	0	3	1	stra_fore	stra_hind	1.16	9.16515			1271	17	38	R0	RRO	R	1136	c	1	1	2	inner_fore	inner_hind	1.15	6.16441				1271	11
													1272	11	78	gang	gang	S	3300	S	0	3	1	stra_fore	stra_hind	1.23	8.83176			1272	1	27	gang	gang	S	3183	S	0	1	1	stra_fore	stra_hind	1.43	5.19615				1272	11
													1273	11	78	gang	gang	S	3301	S	0	3	1	stra_fore	stra_hind	1.23	8.83176			1273	1	20	gang	gang	S	3188	S	0	1	1	stra_fore	stra_hind	1.15	4.47214				1273	11
													1274	12	83	gang	gang	S	3302	S	0	1	8	stra_fore	stra_hind	1.11	9.11043			1274	1	21	gang	gang	S	3189	S	0	1	1	stra_fore	stra_hind	1.15	4.58258				1274	12
													1275	12	85	gang	gang	S	3303	S	0	1	8	stra_fore	stra_hind	1.15	9.21954			1275	1	16	gang	gang	S	3190	S	0	1	1	stra_fore	stra_hind	1.13	4				1275	12
													1276	12	69	gang	gang	S	3304	S	0	1	8	stra_fore	stra_hind	1.19	8.30662			1276	1	18	gang	gang	S	3191	S	0	1	1	stra_fore	stra_hind	1.15	4.24264				1276	12
													1277	12	67	gang	gang	S	3305	S	0	1	8	stra_fore	stra_hind	1.17	8.18535			1277	1	22	gang	gang	S	3192	S	0	1	1	stra_fore	stra_hind	1.14	4.69042				1277	12
													1278	12	86	gang	gang	S	3307	S	0	1	8	stra_fore	stra_hind	1.07	9.27362			1278	1	14	gang	gang	S	3193	S	0	1	1	stra_fore	stra_hind	1.2	3.74166				1278	12
													1279	12	67	gang	gang	S	3308	S	0	1	8	stra_fore	stra_hind	1.17	8.18535			1279	1	18	gang	gang	S	3194	S	0	1	1	stra_fore	stra_hind	1.13	4.24264				1279	12
													1280	12	66	gang	gang	S	3309	S	0	1	8	stra_fore	stra_hind	1.2	8.12404			1280	1	20	gang	gang	S	3195	S	0	1	1	stra_fore	stra_hind	1.18	4.47214				1280	12
													1281	12	68	gang	gang	S	3312	S	0	1	8	stra_fore	stra_hind	1.25	8.24621			1281	2	25	gang	gang	S	3197	S	0	3	2	stra_fore	stra_hind	1.29	5				1281	12
													1282	14	92	gang	gang	S	3324	S	0	1	9	stra_fore	stra_hind	1.24	9.59166			1282	2	25	gang	gang	S	3198	S	0	3	2	stra_fore	stra_hind	1.21	5				1282	14
													1283	14	94	gang	gang	S	3325	S	0	1	9	stra_fore	stra_hind	1.21	9.69536			1283	2	13	gang	gang	S	3199	S	0	3	2	stra_fore	stra_hind	1.18	3.60555				1283	14
													1284	14	93	gang	gang	S	3326	S	0	1	9	stra_fore	stra_hind	1.24	9.64365			1284	2	18	gang	gang	S	3200	S	0	3	2	stra_fore	stra_hind	1.23	4.24264				1284	14
													1285	14	88	gang	gang	S	3330	S	0	1	9	stra_fore	stra_hind	1.23	9.38083			1285	2	17	gang	gang	S	3201	S	0	3	2	stra_fore	stra_hind	1.21	4.12311				1285	14
													1286	14	93	gang	gang	S	3331	S	0	1	9	stra_fore	stra_hind	1.21	9.64365			1286	2	16	gang	gang	S	3206	S	0	3	2	stra_fore	stra_hind	1.23	4				1286	14
													1287	14	91	gang	gang	S	3332	S	0	1	9	stra_fore	stra_hind	1.24	9.53939			1287	3	27	gang	gang	S	3207	S	0	2	3	stra_fore	stra_hind	1.24	5.19615				1287	14
													1288	15	75	gang	gang	S	3334	S	0	3	10	stra_fore	stra_hind	1.16	8.66025			1288	3	23	gang	gang	S	3208	S	0	2	3	stra_fore	stra_hind	1.25	4.79583				1288	15
													1289	15	71	gang	gang	S	3335	S	0	3	10	stra_fore	stra_hind	1.21	8.42615			1289	3	49	gang	gang	S	3210	S	0	2	3	stra_fore	stra_hind	1.32	7				1289	15
													1290	15	73	gang	gang	S	3336	S	0	3	10	stra_fore	stra_hind	1.19	8.544			1290	3	22	gang	gang	S	3211	S	0	2	3	stra_fore	stra_hind	1.33	4.69042				1290	15
													1291	15	71	gang	gang	S	3337	S	0	3	10	stra_fore	stra_hind	1.18	8.42615			1291	3	24	gang	gang	S	3212	S	0	2	3	stra_fore	stra_hind	1.35	4.89898				1291	15
													1292	15	82	gang	gang	S	3338	S	0	3	10	stra_fore	stra_hind	1.24	9.05539			1292	3	27	gang	gang	S	3213	S	0	2	3	stra_fore	stra_hind	1.3	5.19615				1292	15
													1293	15	65	gang	gang	S	3340	S	0	3	10	stra_fore	stra_hind	1.18	8.06226			1293	3	26	gang	gang	S	3214	S	0	2	3	stra_fore	stra_hind	1.29	5.09902				1293	15
													1294	15	71	gang	gang	S	3341	S	0	3	10	stra_fore	stra_hind	1.17	8.42615			1294	3	23	gang	gang	S	3215	S	0	2	3	stra_fore	stra_hind	1.26	4.79583				1294	15
													1295	15	78	gang	gang	S	3342	S	0	3	10	stra_fore	stra_hind	1.23	8.83176			1295	5	19	gang	gang	S	3225	S	0	4	5	stra_fore	stra_hind	1.31	4.3589				1295	15
													1296	15	67	gang	gang	S	3343	S	0	3	10	stra_fore	stra_hind	1.23	8.18535			1296	5	23	gang	gang	S	3229	S	0	4	5	stra_fore	stra_hind	1.29	4.79583				1296	15
													1297	15	72	gang	gang	S	3344	S	0	3	10	stra_fore	stra_hind	1.18	8.48528			1297	7	27	gang	gang	S	3245	S	0	1	6	stra_fore	stra_hind	1.43	5.19615				1297	15
													1298	15	83	gang	gang	S	3345	S	0	3	10	stra_fore	stra_hind	1.15	9.11043			1298	7	20	gang	gang	S	3250	S	0	1	6	stra_fore	stra_hind	1.15	4.47214				1298	15
													1299	15	64	gang	gang	S	3346	S	0	3	10	stra_fore	stra_hind	1.28	8			1299	7	21	gang	gang	S	3251	S	0	1	6	stra_fore	stra_hind	1.15	4.58258				1299	15
													1300	15	64	gang	gang	S	3347	S	0	3	10	stra_fore	stra_hind	1.18	8			1300	7	16	gang	gang	S	3252	S	0	1	6	stra_fore	stra_hind	1.13	4				1300	15
													1301	17	80	gang	gang	S	3362	S	0	1	2	stra_fore	stra_hind	1.14	8.94427			1301	7	18	gang	gang	S	3253	S	0	1	6	stra_fore	stra_hind	1.15	4.24264				1301	17
													1302	17	78	gang	gang	S	3363	S	0	1	2	stra_fore	stra_hind	1.14	8.83176			1302	7	22	gang	gang	S	3254	S	0	1	6	stra_fore	stra_hind	1.14	4.69042				1302	17
													1303	17	85	gang	gang	S	3364	S	0	1	2	stra_fore	stra_hind	1.13	9.21954			1303	7	14	gang	gang	S	3255	S	0	1	6	stra_fore	stra_hind	1.2	3.74166				1303	17
													1304	17	87	gang	gang	S	3365	S	0	1	2	stra_fore	stra_hind	1.13	9.32738			1304	7	18	gang	gang	S	3256	S	0	1	6	stra_fore	stra_hind	1.13	4.24264				1304	17
													1305	17	85	gang	gang	S	3366	S	0	1	2	stra_fore	stra_hind	1.14	9.21954			1305	7	20	gang	gang	S	3257	S	0	1	6	stra_fore	stra_hind	1.18	4.47214				1305	17
													1306	17	81	gang	gang	S	3367	S	0	1	2	stra_fore	stra_hind	1.15	9			1306	8	19	gang	gang	S	3259	S	0	5	5	stra_fore	stra_hind	1.15	4.3589				1306	17
													1307	17	83	gang	gang	S	3368	S	0	1	2	stra_fore	stra_hind	1.16	9.11043			1307	8	18	gang	gang	S	3260	S	0	5	5	stra_fore	stra_hind	1.14	4.24264				1307	17
													1308	17	85	gang	gang	S	3369	S	0	1	2	stra_fore	stra_hind	1.21	9.21954			1308	8	12	gang	gang	S	3262	S	0	5	5	stra_fore	stra_hind	1.21	3.4641				1308	17
													1309	17	85	gang	gang	S	3370	S	0	1	2	stra_fore	stra_hind	1.27	9.21954			1309	8	18	gang	gang	S	3263	S	0	5	5	stra_fore	stra_hind	1.19	4.24264				1309	17
													1310	17	85	gang	gang	S	3371	S	0	1	2	stra_fore	stra_hind	1.34	9.21954			1310	8	25	gang	gang	S	3264	S	0	5	5	stra_fore	stra_hind	1.22	5				1310	17
													1311	1	87	gang	gang1	S	3385	S	0	1	1	stra_fore	stra_hind	0.96	9.32738			1311	8	18	gang	gang	S	3265	S	0	5	5	stra_fore	stra_hind	1.23	4.24264				1311	1
													1312	1	71	gang	gang1	S	3387	S	0	1	1	stra_fore	stra_hind	1.11	8.42615			1312	8	18	gang	gang	S	3266	S	0	5	5	stra_fore	stra_hind	1.2	4.24264				1312	1
													1313	1	77	gang	gang1	S	3388	S	0	1	1	stra_fore	stra_hind	1.12	8.77496			1313	8	20	gang	gang	S	3267	S	0	5	5	stra_fore	stra_hind	1.21	4.47214				1313	1
													1314	2	85	gang	gang1	S	3389	S	0	3	2	stra_fore	stra_hind	1.14	9.21954			1314	8	19	gang	gang	S	3268	S	0	5	5	stra_fore	stra_hind	1.25	4.3589				1314	2
													1315	2	84	gang	gang1	S	3390	S	0	3	2	stra_fore	stra_hind	1.19	9.16515			1315	8	24	gang	gang	S	3269	S	0	5	5	stra_fore	stra_hind	1.25	4.89898				1315	2
													1316	2	82	gang	gang1	S	3391	S	0	3	2	stra_fore	stra_hind	1.17	9.05539			1316	8	22	gang	gang	S	3270	S	0	5	5	stra_fore	stra_hind	1.25	4.69042				1316	2
													1317	2	79	gang	gang1	S	3392	S	0	3	2	stra_fore	stra_hind	1.17	8.88819			1317	8	21	gang	gang	S	3271	S	0	5	5	stra_fore	stra_hind	1.25	4.58258				1317	2
													1318	2	82	gang	gang1	S	3393	S	0	3	2	stra_fore	stra_hind	1.16	9.05539			1318	9	19	gang	gang	S	3273	S	0	3	6	stra_fore	stra_hind	1.07	4.3589				1318	2
													1319	2	82	gang	gang1	S	3394	S	0	3	2	stra_fore	stra_hind	1.18	9.05539			1319	9	21	gang	gang	S	3274	S	0	3	6	stra_fore	stra_hind	1.08	4.58258				1319	2
													1320	2	92	gang	gang1	S	3395	S	0	3	2	stra_fore	stra_hind	1.21	9.59166			1320	9	20	gang	gang	S	3275	S	0	3	6	stra_fore	stra_hind	1.1	4.47214				1320	2
													1321	2	80	gang	gang1	S	3397	S	0	3	2	stra_fore	stra_hind	1.44	8.94427			1321	10	25	gang	gang	S	3278	S	0	5	7	stra_fore	stra_hind	1.18	5				1321	2
													1322	2	80	gang	gang1	S	3398	S	0	3	2	stra_fore	stra_hind	1.32	8.94427			1322	10	26	gang	gang	S	3279	S	0	5	7	stra_fore	stra_hind	1.2	5.09902				1322	2
													1323	3	81	gang	gang1	S	3399	S	0	2	3	stra_fore	stra_hind	1.31	9			1323	10	27	gang	gang	S	3280	S	0	5	7	stra_fore	stra_hind	1.19	5.19615				1323	3
													1324	3	72	gang	gang1	S	3400	S	0	2	3	stra_fore	stra_hind	1.25	8.48528			1324	10	24	gang	gang	S	3281	S	0	5	7	stra_fore	stra_hind	1.17	4.89898				1324	3
													1325	3	72	gang	gang1	S	3401	S	0	2	3	stra_fore	stra_hind	1.3	8.48528			1325	10	24	gang	gang	S	3282	S	0	5	7	stra_fore	stra_hind	1.22	4.89898				1325	3
													1326	3	79	gang	gang1	S	3402	S	0	2	3	stra_fore	stra_hind	1.29	8.88819			1326	10	26	gang	gang	S	3283	S	0	5	7	stra_fore	stra_hind	1.22	5.09902				1326	3
													1327	3	76	gang	gang1	S	3403	S	0	2	3	stra_fore	stra_hind	1.24	8.7178			1327	10	28	gang	gang	S	3284	S	0	5	7	stra_fore	stra_hind	1.26	5.2915				1327	3
													1328	5	72	gang	gang1	S	3412	S	0	4	5	stra_fore	stra_hind	1.22	8.48528			1328	10	26	gang	gang	S	3285	S	0	5	7	stra_fore	stra_hind	1.2	5.09902				1328	5
													1329	5	73	gang	gang1	S	3414	S	0	4	5	stra_fore	stra_hind	1.24	8.544			1329	10	27	gang	gang	S	3286	S	0	5	7	stra_fore	stra_hind	1.25	5.19615				1329	5
													1330	5	70	gang	gang1	S	3415	S	0	4	5	stra_fore	stra_hind	1.25	8.3666			1330	10	25	gang	gang	S	3287	S	0	5	7	stra_fore	stra_hind	1.17	5				1330	5
													1331	5	71	gang	gang1	S	3416	S	0	4	5	stra_fore	stra_hind	1.24	8.42615			1331	11	16	gang	gang	S	3289	S	0	3	1	stra_fore	stra_hind	1.13	4				1331	5
													1332	5	66	gang	gang1	S	3417	S	0	4	5	stra_fore	stra_hind	1.22	8.12404			1332	11	14	gang	gang	S	3290	S	0	3	1	stra_fore	stra_hind	1.19	3.74166				1332	5
													1333	5	62	gang	gang1	S	3418	S	0	4	5	stra_fore	stra_hind	1.27	7.87401			1333	11	17	gang	gang	S	3291	S	0	3	1	stra_fore	stra_hind	1.16	4.12311				1333	5
													1334	5	61	gang	gang1	S	3419	S	0	4	5	stra_fore	stra_hind	1.24	7.81025			1334	11	20	gang	gang	S	3292	S	0	3	1	stra_fore	stra_hind	1.16	4.47214				1334	5
													1335	5	73	gang	gang1	S	3420	S	0	4	5	stra_fore	stra_hind	1.25	8.544			1335	11	18	gang	gang	S	3293	S	0	3	1	stra_fore	stra_hind	1.18	4.24264				1335	5
													1336	7	87	gang	gang1	S	3429	S	0	1	6	stra_fore	stra_hind	0.96	9.32738			1336	11	18	gang	gang	S	3296	S	0	3	1	stra_fore	stra_hind	1.18	4.24264				1336	7
													1337	7	71	gang	gang1	S	3431	S	0	1	6	stra_fore	stra_hind	1.11	8.42615			1337	11	18	gang	gang	S	3298	S	0	3	1	stra_fore	stra_hind	1.18	4.24264				1337	7
													1338	7	77	gang	gang1	S	3432	S	0	1	6	stra_fore	stra_hind	1.12	8.77496			1338	11	20	gang	gang	S	3299	S	0	3	1	stra_fore	stra_hind	1.16	4.47214				1338	7
													1339	8	74	gang	gang1	S	3433	S	0	5	5	stra_fore	stra_hind	1.24	8.60233			1339	11	20	gang	gang	S	3300	S	0	3	1	stra_fore	stra_hind	1.23	4.47214				1339	8
													1340	8	79	gang	gang1	S	3434	S	0	5	5	stra_fore	stra_hind	1.18	8.88819			1340	11	18	gang	gang	S	3301	S	0	3	1	stra_fore	stra_hind	1.23	4.24264				1340	8
													1341	8	75	gang	gang1	S	3435	S	0	5	5	stra_fore	stra_hind	1.16	8.66025			1341	12	22	gang	gang	S	3302	S	0	1	8	stra_fore	stra_hind	1.11	4.69042				1341	8
													1342	8	78	gang	gang1	S	3436	S	0	5	5	stra_fore	stra_hind	1.12	8.83176			1342	12	21	gang	gang	S	3303	S	0	1	8	stra_fore	stra_hind	1.15	4.58258				1342	8
													1343	8	75	gang	gang1	S	3437	S	0	5	5	stra_fore	stra_hind	1.15	8.66025			1343	12	26	gang	gang	S	3304	S	0	1	8	stra_fore	stra_hind	1.19	5.09902				1343	8
													1344	8	76	gang	gang1	S	3438	S	0	5	5	stra_fore	stra_hind	1.16	8.7178			1344	12	25	gang	gang	S	3305	S	0	1	8	stra_fore	stra_hind	1.17	5				1344	8
													1345	8	75	gang	gang1	S	3439	S	0	5	5	stra_fore	stra_hind	1.23	8.66025			1345	12	18	gang	gang	S	3306	S	0	1	8	stra_fore	stra_hind	1.2	4.24264				1345	8
													1346	8	73	gang	gang1	S	3440	S	0	5	5	stra_fore	stra_hind	1.16	8.544			1346	12	21	gang	gang	S	3307	S	0	1	8	stra_fore	stra_hind	1.07	4.58258				1346	8
													1347	8	74	gang	gang1	S	3441	S	0	5	5	stra_fore	stra_hind	1.18	8.60233			1347	12	24	gang	gang	S	3308	S	0	1	8	stra_fore	stra_hind	1.17	4.89898				1347	8
													1348	8	75	gang	gang1	S	3442	S	0	5	5	stra_fore	stra_hind	1.17	8.66025			1348	12	22	gang	gang	S	3309	S	0	1	8	stra_fore	stra_hind	1.2	4.69042				1348	8
													1349	8	76	gang	gang1	S	3443	S	0	5	5	stra_fore	stra_hind	1.17	8.7178			1349	12	25	gang	gang	S	3312	S	0	1	8	stra_fore	stra_hind	1.25	5				1349	8
													1350	8	79	gang	gang1	S	3444	S	0	5	5	stra_fore	stra_hind	1.14	8.88819			1350	14	18	gang	gang	S	3324	S	0	1	9	stra_fore	stra_hind	1.24	4.24264				1350	8
													1351	8	76	gang	gang1	S	3445	S	0	5	5	stra_fore	stra_hind	1.21	8.7178			1351	14	30	gang	gang	S	3325	S	0	1	9	stra_fore	stra_hind	1.21	5.47723				1351	8
													1352	9	85	gang	gang1	S	3446	S	0	3	6	stra_fore	stra_hind	1.15	9.21954			1352	14	28	gang	gang	S	3330	S	0	1	9	stra_fore	stra_hind	1.23	5.2915				1352	9
													1353	9	87	gang	gang1	S	3447	S	0	3	6	stra_fore	stra_hind	1.07	9.32738			1353	14	32	gang	gang	S	3331	S	0	1	9	stra_fore	stra_hind	1.21	5.65685				1353	9
													1354	9	80	gang	gang1	S	3448	S	0	3	6	stra_fore	stra_hind	1.15	8.94427			1354	14	17	gang	gang	S	3332	S	0	1	9	stra_fore	stra_hind	1.24	4.12311				1354	9
													1355	9	83	gang	gang1	S	3449	S	0	3	6	stra_fore	stra_hind	1.11	9.11043			1355	14	30	gang	gang	S	3333	S	0	1	9	stra_fore	stra_hind	1.21	5.47723				1355	9
													1356	9	86	gang	gang1	S	3450	S	0	3	6	stra_fore	stra_hind	1.08	9.27362			1356	15	25	gang	gang	S	3334	S	0	3	10	stra_fore	stra_hind	1.16	5				1356	9
													1357	9	83	gang	gang1	S	3451	S	0	3	6	stra_fore	stra_hind	1.11	9.11043			1357	15	25	gang	gang	S	3335	S	0	3	10	stra_fore	stra_hind	1.21	5				1357	9
													1358	9	88	gang	gang1	S	3452	S	0	3	6	stra_fore	stra_hind	1.07	9.38083			1358	15	25	gang	gang	S	3336	S	0	3	10	stra_fore	stra_hind	1.19	5				1358	9
													1359	9	81	gang	gang1	S	3453	S	0	3	6	stra_fore	stra_hind	1.08	9			1359	15	28	gang	gang	S	3337	S	0	3	10	stra_fore	stra_hind	1.18	5.2915				1359	9
													1360	9	82	gang	gang1	S	3454	S	0	3	6	stra_fore	stra_hind	1.14	9.05539			1360	15	24	gang	gang	S	3338	S	0	3	10	stra_fore	stra_hind	1.24	4.89898				1360	9
													1361	9	83	gang	gang1	S	3455	S	0	3	6	stra_fore	stra_hind	1.17	9.11043			1361	15	16	gang	gang	S	3340	S	0	3	10	stra_fore	stra_hind	1.18	4				1361	9
													1362	9	83	gang	gang1	S	3456	S	0	3	6	stra_fore	stra_hind	1.12	9.11043			1362	15	23	gang	gang	S	3341	S	0	3	10	stra_fore	stra_hind	1.17	4.79583				1362	9
													1363	9	82	gang	gang1	S	3457	S	0	3	6	stra_fore	stra_hind	1.14	9.05539			1363	15	23	gang	gang	S	3342	S	0	3	10	stra_fore	stra_hind	1.23	4.79583				1363	9
													1364	9	83	gang	gang1	S	3458	S	0	3	6	stra_fore	stra_hind	1.12	9.11043			1364	15	24	gang	gang	S	3343	S	0	3	10	stra_fore	stra_hind	1.23	4.89898				1364	9
													1365	10	72	gang	gang1	S	3460	S	0	5	7	stra_fore	stra_hind	1.26	8.48528			1365	15	23	gang	gang	S	3344	S	0	3	10	stra_fore	stra_hind	1.18	4.79583				1365	10
													1366	10	69	gang	gang1	S	3461	S	0	5	7	stra_fore	stra_hind	1.23	8.30662			1366	15	26	gang	gang	S	3345	S	0	3	10	stra_fore	stra_hind	1.15	5.09902				1366	10
													1367	10	73	gang	gang1	S	3463	S	0	5	7	stra_fore	stra_hind	1.28	8.544			1367	15	20	gang	gang	S	3346	S	0	3	10	stra_fore	stra_hind	1.28	4.47214				1367	10
													1368	10	70	gang	gang1	S	3465	S	0	5	7	stra_fore	stra_hind	1.34	8.3666			1368	15	18	gang	gang	S	3347	S	0	3	10	stra_fore	stra_hind	1.18	4.24264				1368	10
													1369	10	70	gang	gang1	S	3466	S	0	5	7	stra_fore	stra_hind	1.3	8.3666			1369	17	12	gang	gang	S	3363	S	0	1	2	stra_fore	stra_hind	1.14	3.4641				1369	10
													1370	11	77	gang	gang1	S	3467	S	0	3	1	stra_fore	stra_hind	1.25	8.77496			1370	17	17	gang	gang	S	3364	S	0	1	2	stra_fore	stra_hind	1.13	4.12311				1370	11
													1371	11	75	gang	gang1	S	3468	S	0	3	1	stra_fore	stra_hind	1.17	8.66025			1371	17	16	gang	gang	S	3365	S	0	1	2	stra_fore	stra_hind	1.13	4				1371	11
													1372	11	79	gang	gang1	S	3469	S	0	3	1	stra_fore	stra_hind	1.14	8.88819			1372	17	20	gang	gang	S	3366	S	0	1	2	stra_fore	stra_hind	1.14	4.47214				1372	11
													1373	11	77	gang	gang1	S	3470	S	0	3	1	stra_fore	stra_hind	1.18	8.77496			1373	17	19	gang	gang	S	3367	S	0	1	2	stra_fore	stra_hind	1.15	4.3589				1373	11
													1374	11	77	gang	gang1	S	3471	S	0	3	1	stra_fore	stra_hind	1.17	8.77496			1374	17	12	gang	gang	S	3368	S	0	1	2	stra_fore	stra_hind	1.16	3.4641				1374	11
													1375	11	79	gang	gang1	S	3472	S	0	3	1	stra_fore	stra_hind	1.12	8.88819			1375	17	13	gang	gang	S	3369	S	0	1	2	stra_fore	stra_hind	1.21	3.60555				1375	11
													1376	11	76	gang	gang1	S	3473	S	0	3	1	stra_fore	stra_hind	1.12	8.7178			1376	17	25	gang	gang	S	3371	S	0	1	2	stra_fore	stra_hind	1.34	5				1376	11
													1377	11	69	gang	gang1	S	3474	S	0	3	1	stra_fore	stra_hind	1.13	8.30662			1377	1	41	gang	gang1	S	3385	S	0	1	1	stra_fore	stra_hind	0.96	6.40312				1377	11
													1378	11	73	gang	gang1	S	3475	S	0	3	1	stra_fore	stra_hind	1.17	8.544			1378	1	27	gang	gang1	S	3387	S	0	1	1	stra_fore	stra_hind	1.11	5.19615				1378	11
													1379	11	75	gang	gang1	S	3476	S	0	3	1	stra_fore	stra_hind	1.16	8.66025			1379	1	26	gang	gang1	S	3388	S	0	1	1	stra_fore	stra_hind	1.12	5.09902				1379	11
													1380	11	71	gang	gang1	S	3477	S	0	3	1	stra_fore	stra_hind	1.18	8.42615			1380	2	21	gang	gang1	S	3389	S	0	3	2	stra_fore	stra_hind	1.14	4.58258				1380	11
													1381	11	79	gang	gang1	S	3478	S	0	3	1	stra_fore	stra_hind	1.18	8.88819			1381	2	19	gang	gang1	S	3390	S	0	3	2	stra_fore	stra_hind	1.19	4.3589				1381	11
													1382	12	77	gang	gang1	S	3479	S	0	1	8	stra_fore	stra_hind	1.02	8.77496			1382	2	17	gang	gang1	S	3391	S	0	3	2	stra_fore	stra_hind	1.17	4.12311				1382	12
													1383	12	68	gang	gang1	S	3480	S	0	1	8	stra_fore	stra_hind	1.18	8.24621			1383	2	21	gang	gang1	S	3392	S	0	3	2	stra_fore	stra_hind	1.17	4.58258				1383	12
													1384	12	64	gang	gang1	S	3481	S	0	1	8	stra_fore	stra_hind	1.15	8			1384	2	16	gang	gang1	S	3393	S	0	3	2	stra_fore	stra_hind	1.16	4				1384	12
													1385	12	65	gang	gang1	S	3482	S	0	1	8	stra_fore	stra_hind	1.16	8.06226			1385	2	16	gang	gang1	S	3394	S	0	3	2	stra_fore	stra_hind	1.18	4				1385	12
													1386	12	69	gang	gang1	S	3483	S	0	1	8	stra_fore	stra_hind	1.19	8.30662			1386	2	23	gang	gang1	S	3397	S	0	3	2	stra_fore	stra_hind	1.44	4.79583				1386	12
													1387	12	61	gang	gang1	S	3485	S	0	1	8	stra_fore	stra_hind	1.16	7.81025			1387	2	19	gang	gang1	S	3398	S	0	3	2	stra_fore	stra_hind	1.32	4.3589				1387	12
													1388	12	64	gang	gang1	S	3486	S	0	1	8	stra_fore	stra_hind	1.23	8			1388	3	26	gang	gang1	S	3399	S	0	2	3	stra_fore	stra_hind	1.31	5.09902				1388	12
													1389	14	94	gang	gang1	S	3500	S	0	1	9	stra_fore	stra_hind	1.17	9.69536			1389	3	27	gang	gang1	S	3400	S	0	2	3	stra_fore	stra_hind	1.25	5.19615				1389	14
													1390	14	91	gang	gang1	S	3501	S	0	1	9	stra_fore	stra_hind	1.2	9.53939			1390	3	24	gang	gang1	S	3401	S	0	2	3	stra_fore	stra_hind	1.3	4.89898				1390	14
													1391	14	90	gang	gang1	S	3502	S	0	1	9	stra_fore	stra_hind	1.21	9.48683			1391	3	28	gang	gang1	S	3402	S	0	2	3	stra_fore	stra_hind	1.29	5.2915				1391	14
													1392	14	93	gang	gang1	S	3503	S	0	1	9	stra_fore	stra_hind	1.19	9.64365			1392	3	22	gang	gang1	S	3403	S	0	2	3	stra_fore	stra_hind	1.24	4.69042				1392	14
													1393	14	92	gang	gang1	S	3504	S	0	1	9	stra_fore	stra_hind	1.19	9.59166			1393	5	19	gang	gang1	S	3412	S	0	4	5	stra_fore	stra_hind	1.22	4.3589				1393	14
													1394	14	92	gang	gang1	S	3506	S	0	1	9	stra_fore	stra_hind	1.21	9.59166			1394	5	19	gang	gang1	S	3415	S	0	4	5	stra_fore	stra_hind	1.25	4.3589				1394	14
													1395	15	75	gang	gang1	S	3511	S	0	3	10	stra_fore	stra_hind	1.19	8.66025			1395	5	20	gang	gang1	S	3416	S	0	4	5	stra_fore	stra_hind	1.24	4.47214				1395	15
													1396	15	72	gang	gang1	S	3512	S	0	3	10	stra_fore	stra_hind	1.2	8.48528			1396	5	17	gang	gang1	S	3419	S	0	4	5	stra_fore	stra_hind	1.24	4.12311				1396	15
													1397	15	71	gang	gang1	S	3513	S	0	3	10	stra_fore	stra_hind	1.19	8.42615			1397	5	21	gang	gang1	S	3420	S	0	4	5	stra_fore	stra_hind	1.25	4.58258				1397	15
													1398	15	65	gang	gang1	S	3514	S	0	3	10	stra_fore	stra_hind	1.23	8.06226			1398	7	41	gang	gang1	S	3429	S	0	1	6	stra_fore	stra_hind	0.96	6.40312				1398	15
													1399	15	72	gang	gang1	S	3515	S	0	3	10	stra_fore	stra_hind	1.16	8.48528			1399	7	27	gang	gang1	S	3431	S	0	1	6	stra_fore	stra_hind	1.11	5.19615				1399	15
													1400	15	72	gang	gang1	S	3516	S	0	3	10	stra_fore	stra_hind	1.18	8.48528			1400	7	26	gang	gang1	S	3432	S	0	1	6	stra_fore	stra_hind	1.12	5.09902				1400	15
													1401	15	75	gang	gang1	S	3517	S	0	3	10	stra_fore	stra_hind	1.17	8.66025			1401	8	21	gang	gang1	S	3434	S	0	5	5	stra_fore	stra_hind	1.18	4.58258				1401	15
													1402	15	62	gang	gang1	S	3518	S	0	3	10	stra_fore	stra_hind	1.14	7.87401			1402	8	18	gang	gang1	S	3435	S	0	5	5	stra_fore	stra_hind	1.16	4.24264				1402	15
													1403	15	62	gang	gang1	S	3519	S	0	3	10	stra_fore	stra_hind	1.17	7.87401			1403	8	15	gang	gang1	S	3436	S	0	5	5	stra_fore	stra_hind	1.12	3.87298				1403	15
													1404	15	66	gang	gang1	S	3520	S	0	3	10	stra_fore	stra_hind	1.13	8.12404			1404	8	17	gang	gang1	S	3437	S	0	5	5	stra_fore	stra_hind	1.15	4.12311				1404	15
													1405	15	67	gang	gang1	S	3521	S	0	3	10	stra_fore	stra_hind	1.19	8.18535			1405	8	17	gang	gang1	S	3438	S	0	5	5	stra_fore	stra_hind	1.16	4.12311				1405	15
													1406	15	72	gang	gang1	S	3522	S	0	3	10	stra_fore	stra_hind	1.21	8.48528			1406	8	18	gang	gang1	S	3439	S	0	5	5	stra_fore	stra_hind	1.23	4.24264				1406	15
													1407	15	81	gang	gang1	S	3523	S	0	3	10	stra_fore	stra_hind	1.23	9			1407	8	17	gang	gang1	S	3440	S	0	5	5	stra_fore	stra_hind	1.16	4.12311				1407	15
													1408	17	81	gang	gang1	S	3540	S	0	1	2	stra_fore	stra_hind	1.21	9			1408	8	21	gang	gang1	S	3441	S	0	5	5	stra_fore	stra_hind	1.18	4.58258				1408	17
													1409	17	79	gang	gang1	S	3541	S	0	1	2	stra_fore	stra_hind	1.2	8.88819			1409	8	21	gang	gang1	S	3442	S	0	5	5	stra_fore	stra_hind	1.17	4.58258				1409	17
													1410	17	80	gang	gang1	S	3542	S	0	1	2	stra_fore	stra_hind	1.17	8.94427			1410	8	18	gang	gang1	S	3443	S	0	5	5	stra_fore	stra_hind	1.17	4.24264				1410	17
													1411	17	83	gang	gang1	S	3543	S	0	1	2	stra_fore	stra_hind	1.18	9.11043			1411	8	20	gang	gang1	S	3444	S	0	5	5	stra_fore	stra_hind	1.14	4.47214				1411	17
													1412	17	79	gang	gang1	S	3544	S	0	1	2	stra_fore	stra_hind	1.19	8.88819			1412	8	17	gang	gang1	S	3445	S	0	5	5	stra_fore	stra_hind	1.21	4.12311				1412	17
													1413	17	81	gang	gang1	S	3545	S	0	1	2	stra_fore	stra_hind	1.22	9			1413	9	21	gang	gang1	S	3446	S	0	3	6	stra_fore	stra_hind	1.15	4.58258				1413	17
													1414	17	82	gang	gang1	S	3548	S	0	1	2	stra_fore	stra_hind	1.25	9.05539			1414	9	25	gang	gang1	S	3447	S	0	3	6	stra_fore	stra_hind	1.07	5				1414	17
																											1417			1415	9	18	gang	gang1	S	3448	S	0	3	6	stra_fore	stra_hind	1.15	4.24264
																											1418			1416	9	19	gang	gang1	S	3449	S	0	3	6	stra_fore	stra_hind	1.11	4.3589
																											1419			1417	9	20	gang	gang1	S	3451	S	0	3	6	stra_fore	stra_hind	1.11	4.47214
																											1420			1418	9	21	gang	gang1	S	3452	S	0	3	6	stra_fore	stra_hind	1.07	4.58258
																											1421			1419	9	19	gang	gang1	S	3453	S	0	3	6	stra_fore	stra_hind	1.08	4.3589
																											1422			1420	9	20	gang	gang1	S	3454	S	0	3	6	stra_fore	stra_hind	1.14	4.47214
																											1423			1421	9	21	gang	gang1	S	3455	S	0	3	6	stra_fore	stra_hind	1.17	4.58258
																											1424			1422	9	20	gang	gang1	S	3456	S	0	3	6	stra_fore	stra_hind	1.12	4.47214
																											1425			1423	9	21	gang	gang1	S	3457	S	0	3	6	stra_fore	stra_hind	1.14	4.58258
																											1426			1424	9	15	gang	gang1	S	3458	S	0	3	6	stra_fore	stra_hind	1.12	3.87298
																											1427			1425	10	22	gang	gang1	S	3460	S	0	5	7	stra_fore	stra_hind	1.26	4.69042
																											1428			1426	10	23	gang	gang1	S	3461	S	0	5	7	stra_fore	stra_hind	1.23	4.79583
																											1429			1427	10	28	gang	gang1	S	3463	S	0	5	7	stra_fore	stra_hind	1.28	5.2915
																											1430			1428	10	24	gang	gang1	S	3465	S	0	5	7	stra_fore	stra_hind	1.34	4.89898
																											1431			1429	10	23	gang	gang1	S	3466	S	0	5	7	stra_fore	stra_hind	1.3	4.79583
																											1432			1430	11	19	gang	gang1	S	3468	S	0	3	1	stra_fore	stra_hind	1.17	4.3589
																											1433			1431	11	15	gang	gang1	S	3470	S	0	3	1	stra_fore	stra_hind	1.18	3.87298
																											1434			1432	11	19	gang	gang1	S	3471	S	0	3	1	stra_fore	stra_hind	1.17	4.3589
																											1435			1433	11	21	gang	gang1	S	3472	S	0	3	1	stra_fore	stra_hind	1.12	4.58258
																											1436			1434	11	22	gang	gang1	S	3473	S	0	3	1	stra_fore	stra_hind	1.12	4.69042
																											1437			1435	11	16	gang	gang1	S	3475	S	0	3	1	stra_fore	stra_hind	1.17	4
																											1438			1436	11	16	gang	gang1	S	3476	S	0	3	1	stra_fore	stra_hind	1.16	4
																											1439			1437	12	25	gang	gang1	S	3479	S	0	1	8	stra_fore	stra_hind	1.02	5
																											1440			1438	12	23	gang	gang1	S	3480	S	0	1	8	stra_fore	stra_hind	1.18	4.79583
																											1441			1439	12	25	gang	gang1	S	3481	S	0	1	8	stra_fore	stra_hind	1.15	5
																											1442			1440	12	27	gang	gang1	S	3482	S	0	1	8	stra_fore	stra_hind	1.16	5.19615
																											1443			1441	12	28	gang	gang1	S	3483	S	0	1	8	stra_fore	stra_hind	1.19	5.2915
																											1444			1442	12	17	gang	gang1	S	3484	S	0	1	8	stra_fore	stra_hind	1.23	4.12311
																											1445			1443	14	16	gang	gang1	S	3501	S	0	1	9	stra_fore	stra_hind	1.2	4
																											1446			1444	14	15	gang	gang1	S	3502	S	0	1	9	stra_fore	stra_hind	1.21	3.87298
																											1447			1445	14	16	gang	gang1	S	3503	S	0	1	9	stra_fore	stra_hind	1.19	4
																											1448			1446	14	17	gang	gang1	S	3504	S	0	1	9	stra_fore	stra_hind	1.19	4.12311
																											1449			1447	14	15	gang	gang1	S	3506	S	0	1	9	stra_fore	stra_hind	1.21	3.87298
																											1450			1448	15	19	gang	gang1	S	3511	S	0	3	10	stra_fore	stra_hind	1.19	4.3589
																											1451			1449	15	27	gang	gang1	S	3512	S	0	3	10	stra_fore	stra_hind	1.2	5.19615
																											1452			1450	15	26	gang	gang1	S	3513	S	0	3	10	stra_fore	stra_hind	1.19	5.09902
																											1453			1451	15	20	gang	gang1	S	3514	S	0	3	10	stra_fore	stra_hind	1.23	4.47214
																											1454			1452	15	25	gang	gang1	S	3515	S	0	3	10	stra_fore	stra_hind	1.16	5
																											1455			1453	15	25	gang	gang1	S	3516	S	0	3	10	stra_fore	stra_hind	1.18	5
																											1456			1454	15	23	gang	gang1	S	3517	S	0	3	10	stra_fore	stra_hind	1.17	4.79583
																											1457			1455	15	15	gang	gang1	S	3519	S	0	3	10	stra_fore	stra_hind	1.17	3.87298
																											1458			1456	15	18	gang	gang1	S	3520	S	0	3	10	stra_fore	stra_hind	1.13	4.24264
																											1459			1457	15	16	gang	gang1	S	3521	S	0	3	10	stra_fore	stra_hind	1.19	4
																											1460			1458	15	27	gang	gang1	S	3522	S	0	3	10	stra_fore	stra_hind	1.21	5.19615
																											1461			1459	15	16	gang	gang1	S	3523	S	0	3	10	stra_fore	stra_hind	1.23	4
																											1462			1460	17	17	gang	gang1	S	3540	S	0	1	2	stra_fore	stra_hind	1.21	4.12311
																											1463			1461	17	18	gang	gang1	S	3541	S	0	1	2	stra_fore	stra_hind	1.2	4.24264
																											1464			1462	17	12	gang	gang1	S	3542	S	0	1	2	stra_fore	stra_hind	1.17	3.4641
																											1465			1463	17	13	gang	gang1	S	3543	S	0	1	2	stra_fore	stra_hind	1.18	3.60555
																											1466			1464	17	19	gang	gang1	S	3544	S	0	1	2	stra_fore	stra_hind	1.19	4.3589
																											1467			1465	17	16	gang	gang1	S	3545	S	0	1	2	stra_fore	stra_hind	1.22	4
																														1466	17	25	gang	gang1	S	3546	S	0	1	2	stra_fore	stra_hind	1.16	5
																														1467	17	24	gang	gang1	S	3548	S	0	1	2	stra_fore	stra_hind	1.25	4.89898
[truncated: 88 more columns]

## Sheet: mod2_data
		The SAS System		for angular data														timing of retraction data													timing of protraction data
																															The SAS System
		Obs	h1	exe11	exe	dir	circle	rid	rider	horse	P	minPitch	maxPitch	limb	side	limb1		The SAS System
		1	1	U0	ULO	L	c	0	1	1	55.7683	-20.4301	35.3382	inner_fore	left	Lfore															Obs	h1	exe11	exe	dir	circle	rid	rider	horse	limb	sd1	MiPitch2
		2	1	U0	ULO	L	c	0	1	1	61.3125	-22.4077	38.9048	inner_fore	left	Lfore		Obs	h1	exe11	exe	dir	circle	rid	rider	horse	limb	sd1	MaPitch2		1	1	U0	ULO	L	c	0	1	1	inner_fore	1.33	29
		3	1	U0	ULO	L	c	0	1	1	60.9701	-21.9031	39.0671	inner_fore	left	Lfore		1	1	U0	ULO	L	c	0	1	1	inner_fore	1.33	6		2	1	U0	ULO	L	c	0	1	1	inner_fore	1.39	33
		4	1	U0	ULO	L	c	0	1	1	61.6948	-21.8819	39.8128	inner_fore	left	Lfore		2	1	U0	ULO	L	c	0	1	1	inner_fore	1.39	9		3	1	U0	ULO	L	c	0	1	1	inner_fore	1.3	30
		5	1	U0	ULO	L	c	0	1	1	61.4514	-23.3142	38.1372	inner_fore	left	Lfore		3	1	U0	ULO	L	c	0	1	1	inner_fore	1.3	6		4	1	U0	ULO	L	c	0	1	1	inner_fore	1.34	33
		6	1	U0	ULO	L	c	0	1	1	57.8528	-20.9778	36.875	inner_fore	left	Lfore		4	1	U0	ULO	L	c	0	1	1	inner_fore	1.34	7		5	1	U0	ULO	L	c	0	1	1	inner_fore	1.34	32
		7	1	U0	ULO	L	c	0	1	1	57.5383	-21.2766	36.2617	inner_fore	left	Lfore		5	1	U0	ULO	L	c	0	1	1	inner_fore	1.34	6		6	1	U0	ULO	L	c	0	1	1	inner_fore	1.34	33
		8	1	U0	ULO	L	c	0	1	1	58.6111	-20.9437	37.6674	inner_fore	left	Lfore		6	1	U0	ULO	L	c	0	1	1	inner_fore	1.34	8		7	1	U0	ULO	L	c	0	1	1	inner_fore	1.29	33
		9	1	U0	ULO	L	c	0	1	1	61.2198	-21.2646	39.9551	inner_fore	left	Lfore		7	1	U0	ULO	L	c	0	1	1	inner_fore	1.29	8		8	1	U0	ULO	L	c	0	1	1	inner_fore	1.36	37
		10	1	U0	ULO	L	c	0	1	1	57.2377	-20.3761	36.8616	inner_fore	left	Lfore		8	1	U0	ULO	L	c	0	1	1	inner_fore	1.36	12		9	1	U0	ULO	L	c	0	1	1	inner_fore	1.45	36
		11	1	U0	ULO	L	c	0	1	1	57.7544	-21.2181	36.5363	inner_fore	left	Lfore		9	1	U0	ULO	L	c	0	1	1	inner_fore	1.45	13		10	1	U0	ULO	L	c	0	1	1	inner_fore	1.31	34
		12	1	U0	ULO	L	c	0	1	1	62.083	-22.2957	39.7873	inner_fore	left	Lfore		10	1	U0	ULO	L	c	0	1	1	inner_fore	1.31	9		11	1	U0	ULO	L	c	0	1	1	inner_fore	1.4	36
		13	1	U0	ULO	L	c	0	1	1	64.9639	-24.8473	40.1166	inner_fore	left	Lfore		11	1	U0	ULO	L	c	0	1	1	inner_fore	1.4	11		12	1	U0	ULO	L	c	0	1	1	inner_fore	1.29	34
		14	1	U0	ULO	L	c	0	1	1	61.0778	-22.7316	38.3462	inner_fore	left	Lfore		12	1	U0	ULO	L	c	0	1	1	inner_fore	1.29	8		13	1	U0	ULO	L	c	0	1	1	inner_fore	1.28	33
		15	2	U0	ULO	L	c	0	3	2	59.6702	-21.5772	38.093	inner_fore	left	Lfore		13	1	U0	ULO	L	c	0	1	1	inner_fore	1.28	7		14	1	U0	ULO	L	c	0	1	1	inner_fore	1.31	32
		16	2	U0	ULO	L	c	0	3	2	60.9379	-22.5427	38.3951	inner_fore	left	Lfore		14	1	U0	ULO	L	c	0	1	1	inner_fore	1.31	7		15	2	U0	ULO	L	c	0	3	2	inner_fore	1.4	29
		17	2	U0	ULO	L	c	0	3	2	60.3643	-20.6491	39.7153	inner_fore	left	Lfore		15	2	U0	ULO	L	c	0	3	2	inner_fore	1.4	6		16	2	U0	ULO	L	c	0	3	2	inner_fore	1.36	28
		18	2	U0	ULO	L	c	0	3	2	59.8505	-20.8774	38.9732	inner_fore	left	Lfore		16	2	U0	ULO	L	c	0	3	2	inner_fore	1.36	4		17	2	U0	ULO	L	c	0	3	2	inner_fore	1.32	28
		19	2	U0	ULO	L	c	0	3	2	57.6015	-19.2462	38.3552	inner_fore	left	Lfore		17	2	U0	ULO	L	c	0	3	2	inner_fore	1.32	4		18	2	U0	ULO	L	c	0	3	2	inner_fore	1.38	28
		20	2	U0	ULO	L	c	0	3	2	59.7915	-21.1981	38.5933	inner_fore	left	Lfore		18	2	U0	ULO	L	c	0	3	2	inner_fore	1.38	4		19	2	U0	ULO	L	c	0	3	2	inner_fore	1.5	29
		21	2	U0	ULO	L	c	0	3	2	59.3692	-21.9047	37.4644	inner_fore	left	Lfore		19	2	U0	ULO	L	c	0	3	2	inner_fore	1.5	6		20	2	U0	ULO	L	c	0	3	2	inner_fore	1.34	29
		22	3	U0	ULO	L	c	0	2	3	66.6952	-27.9884	38.7069	inner_fore	left	Lfore		20	2	U0	ULO	L	c	0	3	2	inner_fore	1.34	6		21	2	U0	ULO	L	c	0	3	2	inner_fore	1.28	28
		23	3	U0	ULO	L	c	0	2	3	65.2381	-25.9098	39.3283	inner_fore	left	Lfore		21	2	U0	ULO	L	c	0	3	2	inner_fore	1.28	3		22	3	U0	ULO	L	c	0	2	3	inner_fore	1.5	31
		24	3	U0	ULO	L	c	0	2	3	68.6256	-25.7611	42.8645	inner_fore	left	Lfore		22	3	U0	ULO	L	c	0	2	3	inner_fore	1.5	10		23	3	U0	ULO	L	c	0	2	3	inner_fore	1.55	30
		25	3	U0	ULO	L	c	0	2	3	66.167	-25.3753	40.7917	inner_fore	left	Lfore		23	3	U0	ULO	L	c	0	2	3	inner_fore	1.55	8		24	3	U0	ULO	L	c	0	2	3	inner_fore	1.51	31
		26	3	U0	ULO	L	c	0	2	3	68.0986	-28.3096	39.7891	inner_fore	left	Lfore		24	3	U0	ULO	L	c	0	2	3	inner_fore	1.51	9		25	3	U0	ULO	L	c	0	2	3	inner_fore	1.56	32
		27	3	U0	ULO	L	c	0	2	3	66.5775	-27.3349	39.2426	inner_fore	left	Lfore		25	3	U0	ULO	L	c	0	2	3	inner_fore	1.56	9		26	3	U0	ULO	L	c	0	2	3	inner_fore	1.46	32
		28	3	U0	ULO	L	c	0	2	3	64.0696	-27.0153	37.0543	inner_fore	left	Lfore		26	3	U0	ULO	L	c	0	2	3	inner_fore	1.46	9		27	3	U0	ULO	L	c	0	2	3	inner_fore	1.48	31
		29	3	U0	ULO	L	c	0	2	3	67.8754	-26.9865	40.889	inner_fore	left	Lfore		27	3	U0	ULO	L	c	0	2	3	inner_fore	1.48	9		28	3	U0	ULO	L	c	0	2	3	inner_fore	1.47	31
		30	3	U0	ULO	L	c	0	2	3	65.5062	-26.28	39.2262	inner_fore	left	Lfore		28	3	U0	ULO	L	c	0	2	3	inner_fore	1.47	7		29	3	U0	ULO	L	c	0	2	3	inner_fore	1.47	31
		31	3	U0	ULO	L	c	0	2	3	63.4953	-23.3354	40.1599	inner_fore	left	Lfore		29	3	U0	ULO	L	c	0	2	3	inner_fore	1.47	9		30	3	U0	ULO	L	c	0	2	3	inner_fore	1.51	31
		32	3	U0	ULO	L	c	0	2	3	69.6093	-25.8103	43.799	inner_fore	left	Lfore		30	3	U0	ULO	L	c	0	2	3	inner_fore	1.51	8		31	3	U0	ULO	L	c	0	2	3	inner_fore	1.53	32
		33	3	U0	ULO	L	c	0	2	3	71.1603	-27.6953	43.465	inner_fore	left	Lfore		31	3	U0	ULO	L	c	0	2	3	inner_fore	1.53	9		32	3	U0	ULO	L	c	0	2	3	inner_fore	1.53	33
		34	4	U0	ULO	L	c	0	2	4	64.3762	-20.2918	44.0844	inner_fore	left	Lfore		32	3	U0	ULO	L	c	0	2	3	inner_fore	1.53	9		33	3	U0	ULO	L	c	0	2	3	inner_fore	1.42	31
		35	4	U0	ULO	L	c	0	2	4	64.5545	-22.2935	42.2611	inner_fore	left	Lfore		33	3	U0	ULO	L	c	0	2	3	inner_fore	1.42	8		34	4	U0	ULO	L	c	0	2	4	inner_fore	1.2	32
		36	4	U0	ULO	L	c	0	2	4	60.6197	-18.5044	42.1152	inner_fore	left	Lfore		34	4	U0	ULO	L	c	0	2	4	inner_fore	1.2	8		35	4	U0	ULO	L	c	0	2	4	inner_fore	1.26	34
		37	4	U0	ULO	L	c	0	2	4	59.7618	-17.14	42.6218	inner_fore	left	Lfore		35	4	U0	ULO	L	c	0	2	4	inner_fore	1.26	9		36	4	U0	ULO	L	c	0	2	4	inner_fore	1.23	33
		38	5	U0	ULO	L	c	0	4	5	67.6023	-21.2031	46.3992	inner_fore	left	Lfore		36	4	U0	ULO	L	c	0	2	4	inner_fore	1.23	10		37	4	U0	ULO	L	c	0	2	4	inner_fore	1.21	32
		39	5	U0	ULO	L	c	0	4	5	65.9784	-18.1717	47.8067	inner_fore	left	Lfore		37	4	U0	ULO	L	c	0	2	4	inner_fore	1.21	11		38	5	U0	ULO	L	c	0	4	5	inner_fore	1.4	26
		40	5	U0	ULO	L	c	0	4	5	66.1319	-19.0895	47.0424	inner_fore	left	Lfore		38	5	U0	ULO	L	c	0	4	5	inner_fore	1.4	2		39	5	U0	ULO	L	c	0	4	5	inner_fore	1.47	27
		41	5	U0	ULO	L	c	0	4	5	67.336	-19.7093	47.6267	inner_fore	left	Lfore		39	5	U0	ULO	L	c	0	4	5	inner_fore	1.47	5		40	5	U0	ULO	L	c	0	4	5	inner_fore	1.42	26
		42	5	U0	ULO	L	c	0	4	5	65.9022	-20.9948	44.9074	inner_fore	left	Lfore		40	5	U0	ULO	L	c	0	4	5	inner_fore	1.42	3		41	5	U0	ULO	L	c	0	4	5	inner_fore	1.46	29
		43	5	U0	ULO	L	c	0	4	5	65.1692	-20.1527	45.0165	inner_fore	left	Lfore		41	5	U0	ULO	L	c	0	4	5	inner_fore	1.46	5		42	5	U0	ULO	L	c	0	4	5	inner_fore	1.41	29
		44	5	U0	ULO	L	c	0	4	5	67.0484	-18.9179	48.1305	inner_fore	left	Lfore		42	5	U0	ULO	L	c	0	4	5	inner_fore	1.41	4		43	5	U0	ULO	L	c	0	4	5	inner_fore	1.46	27
		45	5	U0	ULO	L	c	0	4	5	69.8966	-20.9284	48.9682	inner_fore	left	Lfore		43	5	U0	ULO	L	c	0	4	5	inner_fore	1.46	1		44	5	U0	ULO	L	c	0	4	5	inner_fore	1.47	28
		46	5	U0	ULO	L	c	0	4	5	71.0649	-21.2758	49.7891	inner_fore	left	Lfore		44	5	U0	ULO	L	c	0	4	5	inner_fore	1.47	4		45	5	U0	ULO	L	c	0	4	5	inner_fore	1.34	28
		47	5	U0	ULO	L	c	0	4	5	71.8705	-20.4939	51.3766	inner_fore	left	Lfore		45	5	U0	ULO	L	c	0	4	5	inner_fore	1.34	3		46	5	U0	ULO	L	c	0	4	5	inner_fore	1.39	28
		48	7	U0	ULO	L	c	0	1	6	57.6412	-21.6762	35.965	inner_fore	left	Lfore		46	5	U0	ULO	L	c	0	4	5	inner_fore	1.39	1		47	5	U0	ULO	L	c	0	4	5	inner_fore	1.34	27
		49	7	U0	ULO	L	c	0	1	6	59.424	-22.4374	36.9866	inner_fore	left	Lfore		47	5	U0	ULO	L	c	0	4	5	inner_fore	1.34	3		48	7	U0	ULO	L	c	0	1	6	inner_fore	1.3	27
		50	7	U0	ULO	L	c	0	1	6	61.1305	-22.8239	38.3066	inner_fore	left	Lfore		48	7	U0	ULO	L	c	0	1	6	inner_fore	1.3	2		49	7	U0	ULO	L	c	0	1	6	inner_fore	1.32	26
		51	7	U0	ULO	L	c	0	1	6	60.7856	-22.479	38.3066	inner_fore	left	Lfore		49	7	U0	ULO	L	c	0	1	6	inner_fore	1.32	-2		50	7	U0	ULO	L	c	0	1	6	inner_fore	1.36	27
		52	7	U0	ULO	L	c	0	1	6	59.0065	-20.1437	38.8628	inner_fore	left	Lfore		50	7	U0	ULO	L	c	0	1	6	inner_fore	1.36	1		51	7	U0	ULO	L	c	0	1	6	inner_fore	1.32	27
		53	7	U0	ULO	L	c	0	1	6	61.9921	-23.1293	38.8628	inner_fore	left	Lfore		51	7	U0	ULO	L	c	0	1	6	inner_fore	1.32	1		52	7	U0	ULO	L	c	0	1	6	inner_fore	1.27	26
		54	7	U0	ULO	L	c	0	1	6	60.5471	-23.2338	37.3132	inner_fore	left	Lfore		52	7	U0	ULO	L	c	0	1	6	inner_fore	1.27	1		53	7	U0	ULO	L	c	0	1	6	inner_fore	1.29	25
		55	7	U0	ULO	L	c	0	1	6	58.3283	-22.1311	36.1972	inner_fore	left	Lfore		53	7	U0	ULO	L	c	0	1	6	inner_fore	1.29	1		54	7	U0	ULO	L	c	0	1	6	inner_fore	1.3	26
		56	7	U0	ULO	L	c	0	1	6	59.6376	-22.8966	36.7411	inner_fore	left	Lfore		54	7	U0	ULO	L	c	0	1	6	inner_fore	1.3	1		55	7	U0	ULO	L	c	0	1	6	inner_fore	1.29	23
		57	8	U0	ULO	L	c	0	5	5	72.3125	-20.709	51.6036	inner_fore	left	Lfore		55	7	U0	ULO	L	c	0	1	6	inner_fore	1.29	1		56	7	U0	ULO	L	c	0	1	6	inner_fore	1.31	26
		58	8	U0	ULO	L	c	0	5	5	72.7465	-22.125	50.6216	inner_fore	left	Lfore		56	7	U0	ULO	L	c	0	1	6	inner_fore	1.31	1		57	8	U0	ULO	L	c	0	5	5	inner_fore	1.24	26
		59	8	U0	ULO	L	c	0	5	5	69.8286	-21.3096	48.5191	inner_fore	left	Lfore		57	8	U0	ULO	L	c	0	5	5	inner_fore	1.24	0		58	8	U0	ULO	L	c	0	5	5	inner_fore	1.21	25
		60	8	U0	ULO	L	c	0	5	5	69.1336	-20.6145	48.5191	inner_fore	left	Lfore		58	8	U0	ULO	L	c	0	5	5	inner_fore	1.21	1		59	8	U0	ULO	L	c	0	5	5	inner_fore	1.19	25
		61	8	U0	ULO	L	c	0	5	5	68.9051	-20.1211	48.784	inner_fore	left	Lfore		59	8	U0	ULO	L	c	0	5	5	inner_fore	1.19	1		60	8	U0	ULO	L	c	0	5	5	inner_fore	1.21	26
		62	8	U0	ULO	L	c	0	5	5	69.7526	-20.7227	49.0298	inner_fore	left	Lfore		60	8	U0	ULO	L	c	0	5	5	inner_fore	1.21	1		61	8	U0	ULO	L	c	0	5	5	inner_fore	1.16	26
		63	8	U0	ULO	L	c	0	5	5	66.8593	-19.348	47.5113	inner_fore	left	Lfore		61	8	U0	ULO	L	c	0	5	5	inner_fore	1.16	1		62	8	U0	ULO	L	c	0	5	5	inner_fore	1.21	26
		64	8	U0	ULO	L	c	0	5	5	69.8289	-20.7549	49.074	inner_fore	left	Lfore		62	8	U0	ULO	L	c	0	5	5	inner_fore	1.21	2		63	8	U0	ULO	L	c	0	5	5	inner_fore	1.22	27
		65	8	U0	ULO	L	c	0	5	5	69.3039	-21.3372	47.9666	inner_fore	left	Lfore		63	8	U0	ULO	L	c	0	5	5	inner_fore	1.22	3		64	8	U0	ULO	L	c	0	5	5	inner_fore	1.29	28
		66	8	U0	ULO	L	c	0	5	5	72.838	-21.5976	51.2404	inner_fore	left	Lfore		64	8	U0	ULO	L	c	0	5	5	inner_fore	1.29	3		65	8	U0	ULO	L	c	0	5	5	inner_fore	1.28	26
		67	8	U0	ULO	L	c	0	5	5	71.6118	-21.215	50.3968	inner_fore	left	Lfore		65	8	U0	ULO	L	c	0	5	5	inner_fore	1.28	-1		66	8	U0	ULO	L	c	0	5	5	inner_fore	1.23	27
		68	8	U0	ULO	L	c	0	5	5	71.9299	-20.789	51.1409	inner_fore	left	Lfore		66	8	U0	ULO	L	c	0	5	5	inner_fore	1.23	0		67	8	U0	ULO	L	c	0	5	5	inner_fore	1.13	27
		69	8	U0	ULO	L	c	0	5	5	68.5186	-20.7296	47.789	inner_fore	left	Lfore		67	8	U0	ULO	L	c	0	5	5	inner_fore	1.13	1		68	8	U0	ULO	L	c	0	5	5	inner_fore	1.22	28
		70	8	U0	ULO	L	c	0	5	5	69.2915	-21.5024	47.789	inner_fore	left	Lfore		68	8	U0	ULO	L	c	0	5	5	inner_fore	1.22	3		69	8	U0	ULO	L	c	0	5	5	inner_fore	1.32	27
		71	8	U0	ULO	L	c	0	5	5	68.4079	-21.9664	46.4414	inner_fore	left	Lfore		69	8	U0	ULO	L	c	0	5	5	inner_fore	1.32	1		70	8	U0	ULO	L	c	0	5	5	inner_fore	1.2	26
		72	8	U0	ULO	L	c	0	5	5	65.6342	-20.6279	45.0063	inner_fore	left	Lfore		70	8	U0	ULO	L	c	0	5	5	inner_fore	1.2	1		71	8	U0	ULO	L	c	0	5	5	inner_fore	1.25	27
		73	8	U0	ULO	L	c	0	5	5	69.8539	-22.3964	47.4574	inner_fore	left	Lfore		71	8	U0	ULO	L	c	0	5	5	inner_fore	1.25	3		72	8	U0	ULO	L	c	0	5	5	inner_fore	1.22	25
		74	8	U0	ULO	L	c	0	5	5	66.4078	-20.9305	45.4773	inner_fore	left	Lfore		72	8	U0	ULO	L	c	0	5	5	inner_fore	1.22	1		73	8	U0	ULO	L	c	0	5	5	inner_fore	1.26	28
		75	8	U0	ULO	L	c	0	5	5	67.7127	-19.6574	48.0553	inner_fore	left	Lfore		73	8	U0	ULO	L	c	0	5	5	inner_fore	1.26	3		74	8	U0	ULO	L	c	0	5	5	inner_fore	1.23	28
		76	8	U0	ULO	L	c	0	5	5	70.9011	-22.722	48.1791	inner_fore	left	Lfore		74	8	U0	ULO	L	c	0	5	5	inner_fore	1.23	2		75	8	U0	ULO	L	c	0	5	5	inner_fore	1.32	29
		77	8	U0	ULO	L	c	0	5	5	70.3392	-23.3576	46.9816	inner_fore	left	Lfore		75	8	U0	ULO	L	c	0	5	5	inner_fore	1.32	1		76	8	U0	ULO	L	c	0	5	5	inner_fore	1.26	27
		78	8	U0	ULO	L	c	0	5	5	66.4109	-20.4352	45.9757	inner_fore	left	Lfore		76	8	U0	ULO	L	c	0	5	5	inner_fore	1.26	2		77	8	U0	ULO	L	c	0	5	5	inner_fore	1.24	26
		79	8	U0	ULO	L	c	0	5	5	72.2855	-22.2208	50.0647	inner_fore	left	Lfore		77	8	U0	ULO	L	c	0	5	5	inner_fore	1.24	2		78	8	U0	ULO	L	c	0	5	5	inner_fore	1.33	30
		80	8	U0	ULO	L	c	0	5	5	69.7924	-21.0294	48.763	inner_fore	left	Lfore		78	8	U0	ULO	L	c	0	5	5	inner_fore	1.33	1		79	8	U0	ULO	L	c	0	5	5	inner_fore	1.33	27
		81	8	U0	ULO	L	c	0	5	5	71.0087	-20.8833	50.1253	inner_fore	left	Lfore		79	8	U0	ULO	L	c	0	5	5	inner_fore	1.33	4		80	8	U0	ULO	L	c	0	5	5	inner_fore	1.27	25
		82	8	U0	ULO	L	c	0	5	5	71.3142	-21.1889	50.1253	inner_fore	left	Lfore		80	8	U0	ULO	L	c	0	5	5	inner_fore	1.27	1		81	8	U0	ULO	L	c	0	5	5	inner_fore	1.26	27
		83	8	U0	ULO	L	c	0	5	5	67.564	-20.1935	47.3705	inner_fore	left	Lfore		81	8	U0	ULO	L	c	0	5	5	inner_fore	1.26	1		82	8	U0	ULO	L	c	0	5	5	inner_fore	1.25	27
		84	8	U0	ULO	L	c	0	5	5	67.9351	-21.0866	46.8485	inner_fore	left	Lfore		82	8	U0	ULO	L	c	0	5	5	inner_fore	1.25	1		83	8	U0	ULO	L	c	0	5	5	inner_fore	1.24	26
		85	8	U0	ULO	L	c	0	5	5	68.1089	-20.8702	47.2387	inner_fore	left	Lfore		83	8	U0	ULO	L	c	0	5	5	inner_fore	1.24	1		84	8	U0	ULO	L	c	0	5	5	inner_fore	1.28	28
		86	8	U0	ULO	L	c	0	5	5	65.8432	-18.6044	47.2387	inner_fore	left	Lfore		84	8	U0	ULO	L	c	0	5	5	inner_fore	1.28	2		85	8	U0	ULO	L	c	0	5	5	inner_fore	1.27	27
		87	8	U0	ULO	L	c	0	5	5	69.5491	-21.0696	48.4795	inner_fore	left	Lfore		85	8	U0	ULO	L	c	0	5	5	inner_fore	1.27	1		86	8	U0	ULO	L	c	0	5	5	inner_fore	1.23	27
		88	8	U0	ULO	L	c	0	5	5	68.6525	-19.7965	48.856	inner_fore	left	Lfore		86	8	U0	ULO	L	c	0	5	5	inner_fore	1.23	1		87	8	U0	ULO	L	c	0	5	5	inner_fore	1.28	29
		89	8	U0	ULO	L	c	0	5	5	67.009	-18.0892	48.9198	inner_fore	left	Lfore		87	8	U0	ULO	L	c	0	5	5	inner_fore	1.28	5		88	8	U0	ULO	L	c	0	5	5	inner_fore	1.25	29
		90	8	U0	ULO	L	c	0	5	5	71.5128	-21.7028	49.81	inner_fore	left	Lfore		88	8	U0	ULO	L	c	0	5	5	inner_fore	1.25	5		89	8	U0	ULO	L	c	0	5	5	inner_fore	1.41	28
		91	8	U0	ULO	L	c	0	5	5	67.9082	-19.7832	48.125	inner_fore	left	Lfore		89	8	U0	ULO	L	c	0	5	5	inner_fore	1.41	6		90	8	U0	ULO	L	c	0	5	5	inner_fore	1.21	22
		92	8	U0	ULO	L	c	0	5	5	67.8208	-16.5051	51.3158	inner_fore	left	Lfore		90	8	U0	ULO	L	c	0	5	5	inner_fore	1.21	-2		91	8	U0	ULO	L	c	0	5	5	inner_fore	1.09	28
		93	8	U0	ULO	L	c	0	5	5	65.6087	-17.0062	48.6025	inner_fore	left	Lfore		91	8	U0	ULO	L	c	0	5	5	inner_fore	1.09	1		92	8	U0	ULO	L	c	0	5	5	inner_fore	1.23	27
		94	9	U0	ULO	L	c	0	3	6	61.5552	-24.7811	36.7741	inner_fore	left	Lfore		92	8	U0	ULO	L	c	0	5	5	inner_fore	1.23	3		93	8	U0	ULO	L	c	0	5	5	inner_fore	1.31	26
		95	9	U0	ULO	L	c	0	3	6	57.1521	-21.4392	35.7129	inner_fore	left	Lfore		93	8	U0	ULO	L	c	0	5	5	inner_fore	1.31	2		94	9	U0	ULO	L	c	0	3	6	inner_fore	1.19	29
		96	9	U0	ULO	L	c	0	3	6	59.7428	-22.5099	37.2329	inner_fore	left	Lfore		94	9	U0	ULO	L	c	0	3	6	inner_fore	1.19	3		95	9	U0	ULO	L	c	0	3	6	inner_fore	1.21	29
		97	9	U0	ULO	L	c	0	3	6	58.9568	-21.7239	37.2329	inner_fore	left	Lfore		95	9	U0	ULO	L	c	0	3	6	inner_fore	1.21	-2		96	9	U0	ULO	L	c	0	3	6	inner_fore	1.23	29
		98	9	U0	ULO	L	c	0	3	6	59.956	-22.5207	37.4353	inner_fore	left	Lfore		96	9	U0	ULO	L	c	0	3	6	inner_fore	1.23	1		97	9	U0	ULO	L	c	0	3	6	inner_fore	1.15	29
		99	9	U0	ULO	L	c	0	3	6	58.4771	-20.4744	38.0027	inner_fore	left	Lfore		97	9	U0	ULO	L	c	0	3	6	inner_fore	1.15	1		98	9	U0	ULO	L	c	0	3	6	inner_fore	1.14	29
		100	9	U0	ULO	L	c	0	3	6	60.9201	-22.5867	38.3334	inner_fore	left	Lfore		98	9	U0	ULO	L	c	0	3	6	inner_fore	1.14	3		99	9	U0	ULO	L	c	0	3	6	inner_fore	1.16	27
		101	9	U0	ULO	L	c	0	3	6	59.0102	-20.647	38.3632	inner_fore	left	Lfore		99	9	U0	ULO	L	c	0	3	6	inner_fore	1.16	1		100	9	U0	ULO	L	c	0	3	6	inner_fore	1.17	30
		102	9	U0	ULO	L	c	0	3	6	58.7563	-20.4137	38.3426	inner_fore	left	Lfore		100	9	U0	ULO	L	c	0	3	6	inner_fore	1.17	2		101	9	U0	ULO	L	c	0	3	6	inner_fore	1.23	28
		103	9	U0	ULO	L	c	0	3	6	59.7794	-22.7134	37.066	inner_fore	left	Lfore		101	9	U0	ULO	L	c	0	3	6	inner_fore	1.23	-1		102	9	U0	ULO	L	c	0	3	6	inner_fore	1.15	27
		104	9	U0	ULO	L	c	0	3	6	56.7701	-21.7858	34.9843	inner_fore	left	Lfore		102	9	U0	ULO	L	c	0	3	6	inner_fore	1.15	0		103	9	U0	ULO	L	c	0	3	6	inner_fore	1.19	28
		105	9	U0	ULO	L	c	0	3	6	56.1642	-21.31	34.8542	inner_fore	left	Lfore		103	9	U0	ULO	L	c	0	3	6	inner_fore	1.19	1		104	9	U0	ULO	L	c	0	3	6	inner_fore	1.25	30
		106	9	U0	ULO	L	c	0	3	6	56.9707	-21.9342	35.0365	inner_fore	left	Lfore		104	9	U0	ULO	L	c	0	3	6	inner_fore	1.25	3		105	9	U0	ULO	L	c	0	3	6	inner_fore	1.26	28
		107	9	U0	ULO	L	c	0	3	6	58.6729	-22.9301	35.7428	inner_fore	left	Lfore		105	9	U0	ULO	L	c	0	3	6	inner_fore	1.26	-1		106	9	U0	ULO	L	c	0	3	6	inner_fore	1.16	27
		108	9	U0	ULO	L	c	0	3	6	57.4669	-19.364	38.1028	inner_fore	left	Lfore		106	9	U0	ULO	L	c	0	3	6	inner_fore	1.16	-1		107	9	U0	ULO	L	c	0	3	6	inner_fore	1.26	31
		109	10	U0	ULO	L	c	0	5	7	58.7966	-23.8067	34.99	inner_fore	left	Lfore		107	9	U0	ULO	L	c	0	3	6	inner_fore	1.26	4		108	9	U0	ULO	L	c	0	3	6	inner_fore	1.23	25
		110	10	U0	ULO	L	c	0	5	7	64.7627	-25.6282	39.1345	inner_fore	left	Lfore		108	9	U0	ULO	L	c	0	3	6	inner_fore	1.23	1		109	10	U0	ULO	L	c	0	5	7	inner_fore	1.22	29
		111	10	U0	ULO	L	c	0	5	7	60.6064	-24.1813	36.4251	inner_fore	left	Lfore		109	10	U0	ULO	L	c	0	5	7	inner_fore	1.22	1		110	10	U0	ULO	L	c	0	5	7	inner_fore	1.3	31
		112	10	U0	ULO	L	c	0	5	7	61.5549	-22.9238	38.6311	inner_fore	left	Lfore		110	10	U0	ULO	L	c	0	5	7	inner_fore	1.3	7		111	10	U0	ULO	L	c	0	5	7	inner_fore	1.36	29
		113	10	U0	ULO	L	c	0	5	7	58.0009	-21.5471	36.4538	inner_fore	left	Lfore		111	10	U0	ULO	L	c	0	5	7	inner_fore	1.36	1		112	10	U0	ULO	L	c	0	5	7	inner_fore	1.4	30
		114	10	U0	ULO	L	c	0	5	7	58.708	-19.8728	38.8352	inner_fore	left	Lfore		112	10	U0	ULO	L	c	0	5	7	inner_fore	1.4	7		113	10	U0	ULO	L	c	0	5	7	inner_fore	1.37	30
		115	10	U0	ULO	L	c	0	5	7	62.6694	-22.711	39.9584	inner_fore	left	Lfore		113	10	U0	ULO	L	c	0	5	7	inner_fore	1.37	-2		114	10	U0	ULO	L	c	0	5	7	inner_fore	1.43	29
		116	10	U0	ULO	L	c	0	5	7	62.8755	-23.1496	39.7259	inner_fore	left	Lfore		114	10	U0	ULO	L	c	0	5	7	inner_fore	1.43	4		115	10	U0	ULO	L	c	0	5	7	inner_fore	1.36	32
		117	10	U0	ULO	L	c	0	5	7	62.932	-24.4718	38.4602	inner_fore	left	Lfore		115	10	U0	ULO	L	c	0	5	7	inner_fore	1.36	6		116	10	U0	ULO	L	c	0	5	7	inner_fore	1.38	30
		118	10	U0	ULO	L	c	0	5	7	57.3201	-20.4102	36.9099	inner_fore	left	Lfore		116	10	U0	ULO	L	c	0	5	7	inner_fore	1.38	6		117	10	U0	ULO	L	c	0	5	7	inner_fore	1.36	28
		119	10	U0	ULO	L	c	0	5	7	61.8922	-22.4312	39.4609	inner_fore	left	Lfore		117	10	U0	ULO	L	c	0	5	7	inner_fore	1.36	3		118	10	U0	ULO	L	c	0	5	7	inner_fore	1.34	32
		120	10	U0	ULO	L	c	0	5	7	63.3505	-23.7167	39.6338	inner_fore	left	Lfore		118	10	U0	ULO	L	c	0	5	7	inner_fore	1.34	6		119	10	U0	ULO	L	c	0	5	7	inner_fore	1.34	33
		121	10	U0	ULO	L	c	0	5	7	66.2878	-23.4939	42.7939	inner_fore	left	Lfore		119	10	U0	ULO	L	c	0	5	7	inner_fore	1.34	7		120	10	U0	ULO	L	c	0	5	7	inner_fore	1.3	31
		122	10	U0	ULO	L	c	0	5	7	66.0067	-23.2128	42.7939	inner_fore	left	Lfore		120	10	U0	ULO	L	c	0	5	7	inner_fore	1.3	6		121	10	U0	ULO	L	c	0	5	7	inner_fore	1.3	29
		123	10	U0	ULO	L	c	0	5	7	66.317	-23.5752	42.7418	inner_fore	left	Lfore		121	10	U0	ULO	L	c	0	5	7	inner_fore	1.3	1		122	10	U0	ULO	L	c	0	5	7	inner_fore	1.22	29
		124	10	U0	ULO	L	c	0	5	7	64.6364	-24.0742	40.5622	inner_fore	left	Lfore		122	10	U0	ULO	L	c	0	5	7	inner_fore	1.22	1		123	10	U0	ULO	L	c	0	5	7	inner_fore	1.22	31
		125	10	U0	ULO	L	c	0	5	7	65.0342	-23.2382	41.7959	inner_fore	left	Lfore		123	10	U0	ULO	L	c	0	5	7	inner_fore	1.22	3		124	10	U0	ULO	L	c	0	5	7	inner_fore	1.24	29
		126	10	U0	ULO	L	c	0	5	7	63.7467	-24.0911	39.6556	inner_fore	left	Lfore		124	10	U0	ULO	L	c	0	5	7	inner_fore	1.24	5		125	10	U0	ULO	L	c	0	5	7	inner_fore	1.26	31
		127	10	U0	ULO	L	c	0	5	7	60.8887	-23.9725	36.9161	inner_fore	left	Lfore		125	10	U0	ULO	L	c	0	5	7	inner_fore	1.26	4		126	10	U0	ULO	L	c	0	5	7	inner_fore	1.26	30
		128	10	U0	ULO	L	c	0	5	7	61.1106	-22.4678	38.6427	inner_fore	left	Lfore		126	10	U0	ULO	L	c	0	5	7	inner_fore	1.26	4		127	10	U0	ULO	L	c	0	5	7	inner_fore	1.26	30
		129	10	U0	ULO	L	c	0	5	7	62.7158	-24.6508	38.0649	inner_fore	left	Lfore		127	10	U0	ULO	L	c	0	5	7	inner_fore	1.26	3		128	10	U0	ULO	L	c	0	5	7	inner_fore	1.34	31
		130	10	U0	ULO	L	c	0	5	7	59.3274	-23.3044	36.023	inner_fore	left	Lfore		128	10	U0	ULO	L	c	0	5	7	inner_fore	1.34	7		129	10	U0	ULO	L	c	0	5	7	inner_fore	1.34	30
		131	10	U0	ULO	L	c	0	5	7	61.0273	-22.1158	38.9115	inner_fore	left	Lfore		129	10	U0	ULO	L	c	0	5	7	inner_fore	1.34	6		130	10	U0	ULO	L	c	0	5	7	inner_fore	1.38	27
		132	10	U0	ULO	L	c	0	5	7	64.5377	-23.624	40.9137	inner_fore	left	Lfore		130	10	U0	ULO	L	c	0	5	7	inner_fore	1.38	0		131	10	U0	ULO	L	c	0	5	7	inner_fore	1.4	31
		133	10	U0	ULO	L	c	0	5	7	56.7336	-19.8965	36.8371	inner_fore	left	Lfore		131	10	U0	ULO	L	c	0	5	7	inner_fore	1.4	1		132	10	U0	ULO	L	c	0	5	7	inner_fore	1.24	32
		134	10	U0	ULO	L	c	0	5	7	60.5304	-20.9258	39.6046	inner_fore	left	Lfore		132	10	U0	ULO	L	c	0	5	7	inner_fore	1.24	7		133	10	U0	ULO	L	c	0	5	7	inner_fore	1.42	32
		135	10	U0	ULO	L	c	0	5	7	58.7029	-22.476	36.2269	inner_fore	left	Lfore		133	10	U0	ULO	L	c	0	5	7	inner_fore	1.42	7		134	10	U0	ULO	L	c	0	5	7	inner_fore	1.34	34
		136	10	U0	ULO	L	c	0	5	7	61.5658	-22.4199	39.146	inner_fore	left	Lfore		134	10	U0	ULO	L	c	0	5	7	inner_fore	1.34	8		135	10	U0	ULO	L	c	0	5	7	inner_fore	1.3	31
		137	10	U0	ULO	L	c	0	5	7	60.005	-22.6693	37.3358	inner_fore	left	Lfore		135	10	U0	ULO	L	c	0	5	7	inner_fore	1.3	5		136	10	U0	ULO	L	c	0	5	7	inner_fore	1.28	30
		138	10	U0	ULO	L	c	0	5	7	65.9463	-24.6383	41.308	inner_fore	left	Lfore		136	10	U0	ULO	L	c	0	5	7	inner_fore	1.28	5		137	10	U0	ULO	L	c	0	5	7	inner_fore	1.24	31
		139	10	U0	ULO	L	c	0	5	7	66.3102	-23.481	42.8292	inner_fore	left	Lfore		137	10	U0	ULO	L	c	0	5	7	inner_fore	1.24	-1		138	10	U0	ULO	L	c	0	5	7	inner_fore	1.22	31
		140	10	U0	ULO	L	c	0	5	7	67.2399	-23.2817	43.9583	inner_fore	left	Lfore		138	10	U0	ULO	L	c	0	5	7	inner_fore	1.22	5		139	10	U0	ULO	L	c	0	5	7	inner_fore	1.28	31
		141	10	U0	ULO	L	c	0	5	7	66.9644	-23.3756	43.5888	inner_fore	left	Lfore		139	10	U0	ULO	L	c	0	5	7	inner_fore	1.28	1		140	10	U0	ULO	L	c	0	5	7	inner_fore	1.24	29
		142	10	U0	ULO	L	c	0	5	7	70.6369	-24.4073	46.2297	inner_fore	left	Lfore		140	10	U0	ULO	L	c	0	5	7	inner_fore	1.24	2		141	10	U0	ULO	L	c	0	5	7	inner_fore	1.23	31
		143	10	U0	ULO	L	c	0	5	7	64.298	-24.5141	39.7839	inner_fore	left	Lfore		141	10	U0	ULO	L	c	0	5	7	inner_fore	1.23	1		142	10	U0	ULO	L	c	0	5	7	inner_fore	1.21	29
		144	10	U0	ULO	L	c	0	5	7	64.9457	-25.2416	39.7041	inner_fore	left	Lfore		142	10	U0	ULO	L	c	0	5	7	inner_fore	1.21	3		143	10	U0	ULO	L	c	0	5	7	inner_fore	1.22	28
		145	10	U0	ULO	L	c	0	5	7	62.5311	-23.076	39.4552	inner_fore	left	Lfore		143	10	U0	ULO	L	c	0	5	7	inner_fore	1.22	1		144	10	U0	ULO	L	c	0	5	7	inner_fore	1.26	29
		146	10	U0	ULO	L	c	0	5	7	63.2018	-24.38	38.8218	inner_fore	left	Lfore		144	10	U0	ULO	L	c	0	5	7	inner_fore	1.26	3		145	10	U0	ULO	L	c	0	5	7	inner_fore	1.27	31
		147	10	U0	ULO	L	c	0	5	7	61.676	-24.8883	36.7878	inner_fore	left	Lfore		145	10	U0	ULO	L	c	0	5	7	inner_fore	1.27	5		146	10	U0	ULO	L	c	0	5	7	inner_fore	1.29	30
		148	10	U0	ULO	L	c	0	5	7	62.3158	-24.963	37.3527	inner_fore	left	Lfore		146	10	U0	ULO	L	c	0	5	7	inner_fore	1.29	6		147	10	U0	ULO	L	c	0	5	7	inner_fore	1.34	30
		149	10	U0	ULO	L	c	0	5	7	61.6608	-23.1058	38.5549	inner_fore	left	Lfore		147	10	U0	ULO	L	c	0	5	7	inner_fore	1.34	5		148	10	U0	ULO	L	c	0	5	7	inner_fore	1.3	29
		150	10	U0	ULO	L	c	0	5	7	60.4849	-22.6175	37.8674	inner_fore	left	Lfore		148	10	U0	ULO	L	c	0	5	7	inner_fore	1.3	5		149	10	U0	ULO	L	c	0	5	7	inner_fore	1.26	32
		151	10	U0	ULO	L	c	0	5	7	55.8756	-18.4896	37.386	inner_fore	left	Lfore		149	10	U0	ULO	L	c	0	5	7	inner_fore	1.26	5		150	10	U0	ULO	L	c	0	5	7	inner_fore	1.32	31
		152	10	U0	ULO	L	c	0	5	7	61.3998	-21.8434	39.5564	inner_fore	left	Lfore		150	10	U0	ULO	L	c	0	5	7	inner_fore	1.32	4		151	10	U0	ULO	L	c	0	5	7	inner_fore	1.34	32
		153	10	U0	ULO	L	c	0	5	7	60.8962	-20.9981	39.8982	inner_fore	left	Lfore		151	10	U0	ULO	L	c	0	5	7	inner_fore	1.34	0		152	10	U0	ULO	L	c	0	5	7	inner_fore	1.31	32
		154	10	U0	ULO	L	c	0	5	7	61.0129	-21.9085	39.1044	inner_fore	left	Lfore		152	10	U0	ULO	L	c	0	5	7	inner_fore	1.31	6		153	10	U0	ULO	L	c	0	5	7	inner_fore	1.37	29
		155	10	U0	ULO	L	c	0	5	7	61.6446	-23.0845	38.5601	inner_fore	left	Lfore		153	10	U0	ULO	L	c	0	5	7	inner_fore	1.37	4		154	10	U0	ULO	L	c	0	5	7	inner_fore	1.27	30
		156	10	U0	ULO	L	c	0	5	7	61.66	-24.7364	36.9237	inner_fore	left	Lfore		154	10	U0	ULO	L	c	0	5	7	inner_fore	1.27	5		155	10	U0	ULO	L	c	0	5	7	inner_fore	1.33	30
		157	10	U0	ULO	L	c	0	5	7	60.3466	-21.3205	39.0261	inner_fore	left	Lfore		155	10	U0	ULO	L	c	0	5	7	inner_fore	1.33	5		156	10	U0	ULO	L	c	0	5	7	inner_fore	1.28	29
		158	11	U0	ULO	L	c	0	3	1	57.943	-15.1374	42.8056	inner_fore	left	Lfore		156	10	U0	ULO	L	c	0	5	7	inner_fore	1.28	4		157	10	U0	ULO	L	c	0	5	7	inner_fore	1.22	31
		159	11	U0	ULO	L	c	0	3	1	56.7971	-10.8298	45.9673	inner_fore	left	Lfore		157	10	U0	ULO	L	c	0	5	7	inner_fore	1.22	1		158	11	U0	ULO	L	c	0	3	1	inner_fore	1.3	30
		160	11	U0	ULO	L	c	0	3	1	61.8434	-15.8761	45.9673	inner_fore	left	Lfore		158	11	U0	ULO	L	c	0	3	1	inner_fore	1.3	5		159	11	U0	ULO	L	c	0	3	1	inner_fore	1.28	29
		161	11	U0	ULO	L	c	0	3	1	56.751	-14.6529	42.0981	inner_fore	left	Lfore		159	11	U0	ULO	L	c	0	3	1	inner_fore	1.28	1		160	11	U0	ULO	L	c	0	3	1	inner_fore	1.25	27
		162	11	U0	ULO	L	c	0	3	1	56.4829	-14.8847	41.5981	inner_fore	left	Lfore		160	11	U0	ULO	L	c	0	3	1	inner_fore	1.25	1		161	11	U0	ULO	L	c	0	3	1	inner_fore	1.25	27
		163	11	U0	ULO	L	c	0	3	1	58.3024	-17.0024	41.3	inner_fore	left	Lfore		161	11	U0	ULO	L	c	0	3	1	inner_fore	1.25	3		162	11	U0	ULO	L	c	0	3	1	inner_fore	1.26	28
		164	11	U0	ULO	L	c	0	3	1	55.4971	-13.1516	42.3456	inner_fore	left	Lfore		162	11	U0	ULO	L	c	0	3	1	inner_fore	1.26	3		163	11	U0	ULO	L	c	0	3	1	inner_fore	1.22	29
		165	11	U0	ULO	L	c	0	3	1	57.149	-14.8035	42.3456	inner_fore	left	Lfore		163	11	U0	ULO	L	c	0	3	1	inner_fore	1.22	4		164	11	U0	ULO	L	c	0	3	1	inner_fore	1.28	30
		166	11	U0	ULO	L	c	0	3	1	60.0941	-15.837	44.2571	inner_fore	left	Lfore		164	11	U0	ULO	L	c	0	3	1	inner_fore	1.28	1		165	11	U0	ULO	L	c	0	3	1	inner_fore	1.16	29
		167	11	U0	ULO	L	c	0	3	1	59.3594	-15.7289	43.6305	inner_fore	left	Lfore		165	11	U0	ULO	L	c	0	3	1	inner_fore	1.16	1		166	11	U0	ULO	L	c	0	3	1	inner_fore	1.34	31
		168	11	U0	ULO	L	c	0	3	1	60.5006	-17.3238	43.1768	inner_fore	left	Lfore		166	11	U0	ULO	L	c	0	3	1	inner_fore	1.34	7		167	11	U0	ULO	L	c	0	3	1	inner_fore	1.23	27
		169	11	U0	ULO	L	c	0	3	1	61.0343	-17.8354	43.1989	inner_fore	left	Lfore		167	11	U0	ULO	L	c	0	3	1	inner_fore	1.23	2		168	11	U0	ULO	L	c	0	3	1	inner_fore	1.22	29
		170	11	U0	ULO	L	c	0	3	1	62.6881	-18.625	44.0631	inner_fore	left	Lfore		168	11	U0	ULO	L	c	0	3	1	inner_fore	1.22	4		169	11	U0	ULO	L	c	0	3	1	inner_fore	1.16	30
		171	11	U0	ULO	L	c	0	3	1	63.1621	-18.4744	44.6876	inner_fore	left	Lfore		169	11	U0	ULO	L	c	0	3	1	inner_fore	1.16	2		170	11	U0	ULO	L	c	0	3	1	inner_fore	1.12	31
		172	11	U0	ULO	L	c	0	3	1	61.4512	-16.8861	44.5651	inner_fore	left	Lfore		170	11	U0	ULO	L	c	0	3	1	inner_fore	1.12	2		171	11	U0	ULO	L	c	0	3	1	inner_fore	1.2	30
		173	11	U0	ULO	L	c	0	3	1	59.5241	-17.4145	42.1095	inner_fore	left	Lfore		171	11	U0	ULO	L	c	0	3	1	inner_fore	1.2	0		172	11	U0	ULO	L	c	0	3	1	inner_fore	1.19	27
		174	11	U0	ULO	L	c	0	3	1	56.8071	-14.9975	41.8095	inner_fore	left	Lfore		172	11	U0	ULO	L	c	0	3	1	inner_fore	1.19	1		173	11	U0	ULO	L	c	0	3	1	inner_fore	1.22	27
		175	11	U0	ULO	L	c	0	3	1	58.3289	-16.385	41.9439	inner_fore	left	Lfore		173	11	U0	ULO	L	c	0	3	1	inner_fore	1.22	1		174	11	U0	ULO	L	c	0	3	1	inner_fore	1.23	28
		176	11	U0	ULO	L	c	0	3	1	58.2012	-16.6363	41.5649	inner_fore	left	Lfore		174	11	U0	ULO	L	c	0	3	1	inner_fore	1.23	3		175	11	U0	ULO	L	c	0	3	1	inner_fore	1.24	28
		177	11	U0	ULO	L	c	0	3	1	61.1588	-19.4967	41.6621	inner_fore	left	Lfore		175	11	U0	ULO	L	c	0	3	1	inner_fore	1.24	4		176	11	U0	ULO	L	c	0	3	1	inner_fore	1.26	30
		178	11	U0	ULO	L	c	0	3	1	55.075	-14.9801	40.0948	inner_fore	left	Lfore		176	11	U0	ULO	L	c	0	3	1	inner_fore	1.26	1		177	11	U0	ULO	L	c	0	3	1	inner_fore	1.22	28
		179	11	U0	ULO	L	c	0	3	1	56.2931	-13.6186	42.6745	inner_fore	left	Lfore		177	11	U0	ULO	L	c	0	3	1	inner_fore	1.22	2		178	11	U0	ULO	L	c	0	3	1	inner_fore	1.21	29
		180	11	U0	ULO	L	c	0	3	1	59.1806	-16.5061	42.6745	inner_fore	left	Lfore		178	11	U0	ULO	L	c	0	3	1	inner_fore	1.21	4		179	11	U0	ULO	L	c	0	3	1	inner_fore	1.3	29
		181	11	U0	ULO	L	c	0	3	1	58.4591	-14.8087	43.6504	inner_fore	left	Lfore		179	11	U0	ULO	L	c	0	3	1	inner_fore	1.3	1		180	11	U0	ULO	L	c	0	3	1	inner_fore	1.28	27
		182	12	U0	ULO	L	c	0	1	8	61.589	-24.2643	37.3247	inner_fore	left	Lfore		180	11	U0	ULO	L	c	0	3	1	inner_fore	1.28	1		181	11	U0	ULO	L	c	0	3	1	inner_fore	1.3	29
		183	12	U0	ULO	L	c	0	1	8	59.0595	-23.8775	35.182	inner_fore	left	Lfore		181	11	U0	ULO	L	c	0	3	1	inner_fore	1.3	3		182	12	U0	ULO	L	c	0	1	8	inner_fore	1.17	30
		184	12	U0	ULO	L	c	0	1	8	57.5021	-23.4491	34.053	inner_fore	left	Lfore		182	12	U0	ULO	L	c	0	1	8	inner_fore	1.17	4		183	12	U0	ULO	L	c	0	1	8	inner_fore	1.18	29
		185	12	U0	ULO	L	c	0	1	8	58.3459	-23.8004	34.5455	inner_fore	left	Lfore		183	12	U0	ULO	L	c	0	1	8	inner_fore	1.18	4		184	12	U0	ULO	L	c	0	1	8	inner_fore	1.22	29
		186	12	U0	ULO	L	c	0	1	8	59.9164	-23.7082	36.2082	inner_fore	left	Lfore		184	12	U0	ULO	L	c	0	1	8	inner_fore	1.22	4		185	12	U0	ULO	L	c	0	1	8	inner_fore	1.2	29
		187	12	U0	ULO	L	c	0	1	8	59.2056	-25.3228	33.8828	inner_fore	left	Lfore		185	12	U0	ULO	L	c	0	1	8	inner_fore	1.2	3		186	12	U0	ULO	L	c	0	1	8	inner_fore	1.21	28
		188	12	U0	ULO	L	c	0	1	8	58.4995	-22.3966	36.103	inner_fore	left	Lfore		186	12	U0	ULO	L	c	0	1	8	inner_fore	1.21	3		187	12	U0	ULO	L	c	0	1	8	inner_fore	1.21	30
		189	12	U0	ULO	L	c	0	1	8	62.2919	-23.7379	38.554	inner_fore	left	Lfore		187	12	U0	ULO	L	c	0	1	8	inner_fore	1.21	3		188	12	U0	ULO	L	c	0	1	8	inner_fore	1.2	29
		190	12	U0	ULO	L	c	0	1	8	67.5939	-26.0756	41.5183	inner_fore	left	Lfore		188	12	U0	ULO	L	c	0	1	8	inner_fore	1.2	1		189	12	U0	ULO	L	c	0	1	8	inner_fore	1.2	31
		191	12	U0	ULO	L	c	0	1	8	62.5628	-25.8894	36.6734	inner_fore	left	Lfore		189	12	U0	ULO	L	c	0	1	8	inner_fore	1.2	1		190	12	U0	ULO	L	c	0	1	8	inner_fore	1.16	30
		192	14	U0	ULO	L	c	0	1	9	69.2147	-25.085	44.1298	inner_fore	left	Lfore		190	12	U0	ULO	L	c	0	1	8	inner_fore	1.16	4		191	12	U0	ULO	L	c	0	1	8	inner_fore	1.14	29
		193	14	U0	ULO	L	c	0	1	9	66.4687	-25.9375	40.5312	inner_fore	left	Lfore		191	12	U0	ULO	L	c	0	1	8	inner_fore	1.14	4		192	14	U0	ULO	L	c	0	1	9	inner_fore	1.29	29
		194	14	U0	ULO	L	c	0	1	9	65.7687	-25.81	39.9586	inner_fore	left	Lfore		192	14	U0	ULO	L	c	0	1	9	inner_fore	1.29	5		193	14	U0	ULO	L	c	0	1	9	inner_fore	1.23	28
		195	14	U0	ULO	L	c	0	1	9	67.9198	-25.2968	42.6229	inner_fore	left	Lfore		193	14	U0	ULO	L	c	0	1	9	inner_fore	1.23	3		194	14	U0	ULO	L	c	0	1	9	inner_fore	1.24	29
		196	14	U0	ULO	L	c	0	1	9	69.9197	-24.523	45.3967	inner_fore	left	Lfore		194	14	U0	ULO	L	c	0	1	9	inner_fore	1.24	4		195	14	U0	ULO	L	c	0	1	9	inner_fore	1.21	30
		197	14	U0	ULO	L	c	0	1	9	73.2363	-26.8069	46.4294	inner_fore	left	Lfore		195	14	U0	ULO	L	c	0	1	9	inner_fore	1.21	6		196	14	U0	ULO	L	c	0	1	9	inner_fore	1.16	29
		198	14	U0	ULO	L	c	0	1	9	72.0018	-27.9995	44.0022	inner_fore	left	Lfore		196	14	U0	ULO	L	c	0	1	9	inner_fore	1.16	6		197	14	U0	ULO	L	c	0	1	9	inner_fore	1.1	31
		199	14	U0	ULO	L	c	0	1	9	67.8648	-23.6703	44.1945	inner_fore	left	Lfore		197	14	U0	ULO	L	c	0	1	9	inner_fore	1.1	6		198	14	U0	ULO	L	c	0	1	9	inner_fore	1.09	31
		200	14	U0	ULO	L	c	0	1	9	72.3754	-27.7885	44.587	inner_fore	left	Lfore		198	14	U0	ULO	L	c	0	1	9	inner_fore	1.09	5		199	14	U0	ULO	L	c	0	1	9	inner_fore	1.11	32
		201	15	U0	ULO	L	c	0	3	10	61.8794	-24.0254	37.854	inner_fore	left	Lfore		199	14	U0	ULO	L	c	0	1	9	inner_fore	1.11	8		200	14	U0	ULO	L	c	0	1	9	inner_fore	1.13	33
		202	15	U0	ULO	L	c	0	3	10	63.1275	-26.3921	36.7354	inner_fore	left	Lfore		200	14	U0	ULO	L	c	0	1	9	inner_fore	1.13	9		201	15	U0	ULO	L	c	0	3	10	inner_fore	1.17	26
		203	15	U0	ULO	L	c	0	3	10	63.4976	-26.7622	36.7354	inner_fore	left	Lfore		201	15	U0	ULO	L	c	0	3	10	inner_fore	1.17	1		202	15	U0	ULO	L	c	0	3	10	inner_fore	1.16	25
		204	15	U0	ULO	L	c	0	3	10	60.0751	-24.7642	35.3108	inner_fore	left	Lfore		202	15	U0	ULO	L	c	0	3	10	inner_fore	1.16	1		203	15	U0	ULO	L	c	0	3	10	inner_fore	1.15	26
		205	15	U0	ULO	L	c	0	3	10	59.8037	-23.5697	36.234	inner_fore	left	Lfore		203	15	U0	ULO	L	c	0	3	10	inner_fore	1.15	1		204	15	U0	ULO	L	c	0	3	10	inner_fore	1.25	29
		206	15	U0	ULO	L	c	0	3	10	61.5796	-25.3455	36.234	inner_fore	left	Lfore		204	15	U0	ULO	L	c	0	3	10	inner_fore	1.25	5		205	15	U0	ULO	L	c	0	3	10	inner_fore	1.2	28
		207	15	U0	ULO	L	c	0	3	10	60.4601	-24.6854	35.7747	inner_fore	left	Lfore		205	15	U0	ULO	L	c	0	3	10	inner_fore	1.2	1		206	15	U0	ULO	L	c	0	3	10	inner_fore	1.14	27
		208	15	U0	ULO	L	c	0	3	10	61.8085	-23.9547	37.8538	inner_fore	left	Lfore		206	15	U0	ULO	L	c	0	3	10	inner_fore	1.14	1		207	15	U0	ULO	L	c	0	3	10	inner_fore	1.18	28
		209	15	U0	ULO	L	c	0	3	10	64.0263	-25.9287	38.0976	inner_fore	left	Lfore		207	15	U0	ULO	L	c	0	3	10	inner_fore	1.18	3		208	15	U0	ULO	L	c	0	3	10	inner_fore	1.18	27
		210	15	U0	ULO	L	c	0	3	10	63.2655	-25.4554	37.8102	inner_fore	left	Lfore		208	15	U0	ULO	L	c	0	3	10	inner_fore	1.18	1		209	15	U0	ULO	L	c	0	3	10	inner_fore	1.2	26
		211	15	U0	ULO	L	c	0	3	10	63.983	-27.3428	36.6402	inner_fore	left	Lfore		209	15	U0	ULO	L	c	0	3	10	inner_fore	1.2	0		210	15	U0	ULO	L	c	0	3	10	inner_fore	1.1	26
		212	15	U0	ULO	L	c	0	3	10	62.8446	-26.2044	36.6402	inner_fore	left	Lfore		210	15	U0	ULO	L	c	0	3	10	inner_fore	1.1	1		211	15	U0	ULO	L	c	0	3	10	inner_fore	1.08	26
		213	15	U0	ULO	L	c	0	3	10	64.3274	-27.0244	37.303	inner_fore	left	Lfore		211	15	U0	ULO	L	c	0	3	10	inner_fore	1.08	1		212	15	U0	ULO	L	c	0	3	10	inner_fore	1.14	28
		214	15	U0	ULO	L	c	0	3	10	60.3256	-24.7865	35.5391	inner_fore	left	Lfore		212	15	U0	ULO	L	c	0	3	10	inner_fore	1.14	1		213	15	U0	ULO	L	c	0	3	10	inner_fore	1.19	28
		215	15	U0	ULO	L	c	0	3	10	61.5588	-26.0437	35.5151	inner_fore	left	Lfore		213	15	U0	ULO	L	c	0	3	10	inner_fore	1.19	3		214	15	U0	ULO	L	c	0	3	10	inner_fore	1.16	28
		216	15	U0	ULO	L	c	0	3	10	64.3415	-28.0209	36.3206	inner_fore	left	Lfore		214	15	U0	ULO	L	c	0	3	10	inner_fore	1.16	1		215	15	U0	ULO	L	c	0	3	10	inner_fore	1.17	28
		217	15	U0	ULO	L	c	0	3	10	58.9766	-24.022	34.9546	inner_fore	left	Lfore		215	15	U0	ULO	L	c	0	3	10	inner_fore	1.17	4		216	15	U0	ULO	L	c	0	3	10	inner_fore	1.16	28
		218	15	U0	ULO	L	c	0	3	10	59.4637	-23.6661	35.7977	inner_fore	left	Lfore		216	15	U0	ULO	L	c	0	3	10	inner_fore	1.16	3		217	15	U0	ULO	L	c	0	3	10	inner_fore	1.16	30
		219	15	U0	ULO	L	c	0	3	10	62.918	-27.0629	35.8552	inner_fore	left	Lfore		217	15	U0	ULO	L	c	0	3	10	inner_fore	1.16	4		218	15	U0	ULO	L	c	0	3	10	inner_fore	1.16	28
		220	15	U0	ULO	L	c	0	3	10	62.2927	-23.3529	38.9397	inner_fore	left	Lfore		218	15	U0	ULO	L	c	0	3	10	inner_fore	1.16	4		219	15	U0	ULO	L	c	0	3	10	inner_fore	1.16	25
		221	15	U0	ULO	L	c	0	3	10	62.1015	-23.3884	38.713	inner_fore	left	Lfore		219	15	U0	ULO	L	c	0	3	10	inner_fore	1.16	1		220	15	U0	ULO	L	c	0	3	10	inner_fore	1.22	27
		222	15	U0	ULO	L	c	0	3	10	60.4198	-23.513	36.9068	inner_fore	left	Lfore		220	15	U0	ULO	L	c	0	3	10	inner_fore	1.22	0		221	15	U0	ULO	L	c	0	3	10	inner_fore	1.19	25
		223	15	U0	ULO	L	c	0	3	10	62.6728	-24.375	38.2978	inner_fore	left	Lfore		221	15	U0	ULO	L	c	0	3	10	inner_fore	1.19	1		222	15	U0	ULO	L	c	0	3	10	inner_fore	1.19	26
		224	15	U0	ULO	L	c	0	3	10	58.4214	-22.2284	36.1929	inner_fore	left	Lfore		222	15	U0	ULO	L	c	0	3	10	inner_fore	1.19	1		223	15	U0	ULO	L	c	0	3	10	inner_fore	1.2	27
		225	15	U0	ULO	L	c	0	3	10	62.3915	-25.8952	36.4963	inner_fore	left	Lfore		223	15	U0	ULO	L	c	0	3	10	inner_fore	1.2	3		224	15	U0	ULO	L	c	0	3	10	inner_fore	1.18	31
		226	17	U0	ULO	L	c	0	1	2	58.7561	-18.2191	40.537	inner_fore	left	Lfore		224	15	U0	ULO	L	c	0	3	10	inner_fore	1.18	5		225	15	U0	ULO	L	c	0	3	10	inner_fore	1.2	28
		227	17	U0	ULO	L	c	0	1	2	60.4427	-19.7884	40.6543	inner_fore	left	Lfore		225	15	U0	ULO	L	c	0	3	10	inner_fore	1.2	4		226	17	U0	ULO	L	c	0	1	2	inner_fore	1.24	25
		228	17	U0	ULO	L	c	0	1	2	58.6409	-17.3572	41.2837	inner_fore	left	Lfore		226	17	U0	ULO	L	c	0	1	2	inner_fore	1.24	1		227	17	U0	ULO	L	c	0	1	2	inner_fore	1.24	26
		229	17	U0	ULO	L	c	0	1	2	60.3017	-19.018	41.2837	inner_fore	left	Lfore		227	17	U0	ULO	L	c	0	1	2	inner_fore	1.24	2		228	17	U0	ULO	L	c	0	1	2	inner_fore	1.25	26
		230	17	U0	ULO	L	c	0	1	2	58.8993	-19.0122	39.8871	inner_fore	left	Lfore		228	17	U0	ULO	L	c	0	1	2	inner_fore	1.25	1		229	17	U0	ULO	L	c	0	1	2	inner_fore	1.21	26
		231	17	U0	ULO	L	c	0	1	2	56.7018	-18.0205	38.6813	inner_fore	left	Lfore		229	17	U0	ULO	L	c	0	1	2	inner_fore	1.21	1		230	17	U0	ULO	L	c	0	1	2	inner_fore	1.23	27
		232	17	U0	ULO	L	c	0	1	2	57.2231	-20.0191	37.204	inner_fore	left	Lfore		230	17	U0	ULO	L	c	0	1	2	inner_fore	1.23	3		231	17	U0	ULO	L	c	0	1	2	inner_fore	1.25	24
		233	17	U0	ULO	L	c	0	1	2	59.5601	-21.5136	38.0465	inner_fore	left	Lfore		231	17	U0	ULO	L	c	0	1	2	inner_fore	1.25	4		232	17	U0	ULO	L	c	0	1	2	inner_fore	1.3	27
		234	17	U0	ULO	L	c	0	1	2	56.8238	-19.4038	37.42	inner_fore	left	Lfore		232	17	U0	ULO	L	c	0	1	2	inner_fore	1.3	4		233	17	U0	ULO	L	c	0	1	2	inner_fore	1.24	26
		235	17	U0	ULO	L	c	0	1	2	57.262	-18.5211	38.7409	inner_fore	left	Lfore		233	17	U0	ULO	L	c	0	1	2	inner_fore	1.24	2		234	17	U0	ULO	L	c	0	1	2	inner_fore	1.28	27
		236	17	U0	ULO	L	c	0	1	2	57.856	-19.0519	38.8041	inner_fore	left	Lfore		234	17	U0	ULO	L	c	0	1	2	inner_fore	1.28	1		235	17	U0	ULO	L	c	0	1	2	inner_fore	1.26	27
		237	17	U0	ULO	L	c	0	1	2	61.9702	-20.8279	41.1423	inner_fore	left	Lfore		235	17	U0	ULO	L	c	0	1	2	inner_fore	1.26	2		236	17	U0	ULO	L	c	0	1	2	inner_fore	1.26	27
		238	17	U0	ULO	L	c	0	1	2	61.4749	-20.6535	40.8214	inner_fore	left	Lfore		236	17	U0	ULO	L	c	0	1	2	inner_fore	1.26	2		237	17	U0	ULO	L	c	0	1	2	inner_fore	1.29	28
		239	17	U0	ULO	L	c	0	1	2	59.2907	-20.754	38.5367	inner_fore	left	Lfore		237	17	U0	ULO	L	c	0	1	2	inner_fore	1.29	5		238	17	U0	ULO	L	c	0	1	2	inner_fore	1.22	24
		240	17	U0	ULO	L	c	0	1	2	61.3328	-21.2913	40.0415	inner_fore	left	Lfore		238	17	U0	ULO	L	c	0	1	2	inner_fore	1.22	4		239	17	U0	ULO	L	c	0	1	2	inner_fore	1.16	26
		241	17	U0	ULO	L	c	0	1	2	62.1515	-21.8231	40.3284	inner_fore	left	Lfore		239	17	U0	ULO	L	c	0	1	2	inner_fore	1.16	1		240	17	U0	ULO	L	c	0	1	2	inner_fore	1.21	28
		242	17	U0	ULO	L	c	0	1	2	60.4229	-22.5239	37.8989	inner_fore	left	Lfore		240	17	U0	ULO	L	c	0	1	2	inner_fore	1.21	4		241	17	U0	ULO	L	c	0	1	2	inner_fore	1.27	30
		243	17	U0	ULO	L	c	0	1	2	58.8079	-21.5111	37.2968	inner_fore	left	Lfore		241	17	U0	ULO	L	c	0	1	2	inner_fore	1.27	7		242	17	U0	ULO	L	c	0	1	2	inner_fore	1.27	27
		244	17	U0	ULO	L	c	0	1	2	56.7003	-19.4035	37.2968	inner_fore	left	Lfore		242	17	U0	ULO	L	c	0	1	2	inner_fore	1.27	3		243	17	U0	ULO	L	c	0	1	2	inner_fore	1.29	27
		245	17	U0	ULO	L	c	0	1	2	56.3894	-19.3665	37.023	inner_fore	left	Lfore		243	17	U0	ULO	L	c	0	1	2	inner_fore	1.29	1		244	17	U0	ULO	L	c	0	1	2	inner_fore	1.23	25
		246	1	U0	URO	R	c	0	1	1	57.6511	-19.5517	38.0994	outer_fore	left	Lfore		244	17	U0	ULO	L	c	0	1	2	inner_fore	1.23	1		245	17	U0	ULO	L	c	0	1	2	inner_fore	1.28	28
		247	1	U0	URO	R	c	0	1	1	63.2412	-24.0579	39.1833	outer_fore	left	Lfore		245	17	U0	ULO	L	c	0	1	2	inner_fore	1.28	4		246	1	U0	URO	R	c	0	1	1	outer_fore	1.33	30
		248	1	U0	URO	R	c	0	1	1	62.9003	-23.8839	39.0164	outer_fore	left	Lfore		246	1	U0	URO	R	c	0	1	1	outer_fore	1.33	3		247	1	U0	URO	R	c	0	1	1	outer_fore	1.37	29
		249	1	U0	URO	R	c	0	1	1	61.7774	-23.1472	38.6302	outer_fore	left	Lfore		247	1	U0	URO	R	c	0	1	1	outer_fore	1.37	3		248	1	U0	URO	R	c	0	1	1	outer_fore	1.35	28
		250	1	U0	URO	R	c	0	1	1	59.4219	-22.7144	36.7075	outer_fore	left	Lfore		248	1	U0	URO	R	c	0	1	1	outer_fore	1.35	3		249	1	U0	URO	R	c	0	1	1	outer_fore	1.34	28
		251	1	U0	URO	R	c	0	1	1	57.0139	-21.9921	35.0218	outer_fore	left	Lfore		249	1	U0	URO	R	c	0	1	1	outer_fore	1.34	3		250	1	U0	URO	R	c	0	1	1	outer_fore	1.38	29
		252	1	U0	URO	R	c	0	1	1	60.5991	-22.9511	37.648	outer_fore	left	Lfore		250	1	U0	URO	R	c	0	1	1	outer_fore	1.38	4		251	1	U0	URO	R	c	0	1	1	outer_fore	1.33	30
		253	1	U0	URO	R	c	0	1	1	60.7492	-23.6072	37.1421	outer_fore	left	Lfore		251	1	U0	URO	R	c	0	1	1	outer_fore	1.33	5		252	1	U0	URO	R	c	0	1	1	outer_fore	1.37	33
		254	1	U0	URO	R	c	0	1	1	61.3578	-23.4818	37.876	outer_fore	left	Lfore		252	1	U0	URO	R	c	0	1	1	outer_fore	1.37	8		253	1	U0	URO	R	c	0	1	1	outer_fore	1.38	33
		255	1	U0	URO	R	c	0	1	1	61.8188	-23.9719	37.8469	outer_fore	left	Lfore		253	1	U0	URO	R	c	0	1	1	outer_fore	1.38	9		254	1	U0	URO	R	c	0	1	1	outer_fore	1.41	30
		256	1	U0	URO	R	c	0	1	1	62.2932	-24.4801	37.8132	outer_fore	left	Lfore		254	1	U0	URO	R	c	0	1	1	outer_fore	1.41	6		255	1	U0	URO	R	c	0	1	1	outer_fore	1.36	27
		257	1	U0	URO	R	c	0	1	1	60.2787	-21.6534	38.6253	outer_fore	left	Lfore		255	1	U0	URO	R	c	0	1	1	outer_fore	1.36	3		256	1	U0	URO	R	c	0	1	1	outer_fore	1.35	27
		258	2	U0	URO	R	c	0	3	2	58.5865	-19.2119	39.3747	outer_fore	left	Lfore		256	1	U0	URO	R	c	0	1	1	outer_fore	1.35	1		257	1	U0	URO	R	c	0	1	1	outer_fore	1.33	28
		259	2	U0	URO	R	c	0	3	2	57.6252	-19.5163	38.1089	outer_fore	left	Lfore		257	1	U0	URO	R	c	0	1	1	outer_fore	1.33	2		258	2	U0	URO	R	c	0	3	2	outer_fore	1.32	30
		260	2	U0	URO	R	c	0	3	2	56.6871	-21.0323	35.6549	outer_fore	left	Lfore		258	2	U0	URO	R	c	0	3	2	outer_fore	1.32	5		259	2	U0	URO	R	c	0	3	2	outer_fore	1.28	29
		261	2	U0	URO	R	c	0	3	2	57.3671	-20.148	37.2191	outer_fore	left	Lfore		259	2	U0	URO	R	c	0	3	2	outer_fore	1.28	3		260	2	U0	URO	R	c	0	3	2	outer_fore	1.34	30
		262	2	U0	URO	R	c	0	3	2	56.3132	-19.5007	36.8125	outer_fore	left	Lfore		260	2	U0	URO	R	c	0	3	2	outer_fore	1.34	4		261	2	U0	URO	R	c	0	3	2	outer_fore	1.33	35
		263	2	U0	URO	R	c	0	3	2	58.0174	-21.7284	36.289	outer_fore	left	Lfore		261	2	U0	URO	R	c	0	3	2	outer_fore	1.33	11		262	2	U0	URO	R	c	0	3	2	outer_fore	1.51	30
		264	3	U0	URO	R	c	0	2	3	70.605	-28.2964	42.3086	outer_fore	left	Lfore		262	2	U0	URO	R	c	0	3	2	outer_fore	1.51	8		263	2	U0	URO	R	c	0	3	2	outer_fore	1.32	33
		265	3	U0	URO	R	c	0	2	3	67.9312	-27.8055	40.1257	outer_fore	left	Lfore		263	2	U0	URO	R	c	0	3	2	outer_fore	1.32	7		264	3	U0	URO	R	c	0	2	3	outer_fore	1.43	30
		266	3	U0	URO	R	c	0	2	3	64.691	-23.8647	40.8263	outer_fore	left	Lfore		264	3	U0	URO	R	c	0	2	3	outer_fore	1.43	8		265	3	U0	URO	R	c	0	2	3	outer_fore	1.44	31
		267	3	U0	URO	R	c	0	2	3	64.0015	-23.7675	40.234	outer_fore	left	Lfore		265	3	U0	URO	R	c	0	2	3	outer_fore	1.44	7		266	3	U0	URO	R	c	0	2	3	outer_fore	1.53	32
		268	3	U0	URO	R	c	0	2	3	66.4584	-26.3842	40.0742	outer_fore	left	Lfore		266	3	U0	URO	R	c	0	2	3	outer_fore	1.53	9		267	3	U0	URO	R	c	0	2	3	outer_fore	1.68	30
		269	3	U0	URO	R	c	0	2	3	66.0179	-25.9107	40.1072	outer_fore	left	Lfore		267	3	U0	URO	R	c	0	2	3	outer_fore	1.68	9		268	3	U0	URO	R	c	0	2	3	outer_fore	1.51	31
		270	3	U0	URO	R	c	0	2	3	67.0601	-26.5612	40.4989	outer_fore	left	Lfore		268	3	U0	URO	R	c	0	2	3	outer_fore	1.51	9		269	3	U0	URO	R	c	0	2	3	outer_fore	1.52	31
		271	3	U0	URO	R	c	0	2	3	67.8425	-26.3057	41.5369	outer_fore	left	Lfore		269	3	U0	URO	R	c	0	2	3	outer_fore	1.52	9		270	3	U0	URO	R	c	0	2	3	outer_fore	1.54	31
		272	3	U0	URO	R	c	0	2	3	65.3072	-24.0291	41.2781	outer_fore	left	Lfore		270	3	U0	URO	R	c	0	2	3	outer_fore	1.54	8		271	3	U0	URO	R	c	0	2	3	outer_fore	1.48	30
		273	4	U0	URO	R	c	0	2	4	59.7935	-14.7547	45.0388	outer_fore	left	Lfore		271	3	U0	URO	R	c	0	2	3	outer_fore	1.48	8		272	3	U0	URO	R	c	0	2	3	outer_fore	1.46	31
		274	4	U0	URO	R	c	0	2	4	58.2217	-15.4117	42.81	outer_fore	left	Lfore		272	3	U0	URO	R	c	0	2	3	outer_fore	1.46	7		273	4	U0	URO	R	c	0	2	4	outer_fore	1.33	32
		275	4	U0	URO	R	c	0	2	4	57.6778	-17.3786	40.2992	outer_fore	left	Lfore		273	4	U0	URO	R	c	0	2	4	outer_fore	1.33	11		274	4	U0	URO	R	c	0	2	4	outer_fore	1.35	28
		276	4	U0	URO	R	c	0	2	4	60.1726	-16.3627	43.8099	outer_fore	left	Lfore		274	4	U0	URO	R	c	0	2	4	outer_fore	1.35	9		275	4	U0	URO	R	c	0	2	4	outer_fore	1.23	32
		277	4	U0	URO	R	c	0	2	4	58.8713	-16.8563	42.015	outer_fore	left	Lfore		275	4	U0	URO	R	c	0	2	4	outer_fore	1.23	8		276	4	U0	URO	R	c	0	2	4	outer_fore	1.26	30
		278	4	U0	URO	R	c	0	2	4	61.1982	-16.456	44.7421	outer_fore	left	Lfore		276	4	U0	URO	R	c	0	2	4	outer_fore	1.26	10		277	4	U0	URO	R	c	0	2	4	outer_fore	1.35	31
		279	4	U0	URO	R	c	0	2	4	62.306	-19.6863	42.6197	outer_fore	left	Lfore		277	4	U0	URO	R	c	0	2	4	outer_fore	1.35	8		278	4	U0	URO	R	c	0	2	4	outer_fore	1.33	33
		280	4	U0	URO	R	c	0	2	4	59.117	-15.7483	43.3687	outer_fore	left	Lfore		278	4	U0	URO	R	c	0	2	4	outer_fore	1.33	9		279	4	U0	URO	R	c	0	2	4	outer_fore	1.35	28
		281	4	U0	URO	R	c	0	2	4	59.0414	-18.7538	40.2876	outer_fore	left	Lfore		279	4	U0	URO	R	c	0	2	4	outer_fore	1.35	7		280	4	U0	URO	R	c	0	2	4	outer_fore	1.28	31
		282	4	U0	URO	R	c	0	2	4	63.699	-20.2123	43.4867	outer_fore	left	Lfore		280	4	U0	URO	R	c	0	2	4	outer_fore	1.28	9		281	4	U0	URO	R	c	0	2	4	outer_fore	1.44	32
		283	4	U0	URO	R	c	0	2	4	64.644	-21.7138	42.9302	outer_fore	left	Lfore		281	4	U0	URO	R	c	0	2	4	outer_fore	1.44	11		282	4	U0	URO	R	c	0	2	4	outer_fore	1.27	30
		284	4	U0	URO	R	c	0	2	4	62.5173	-18.1155	44.4017	outer_fore	left	Lfore		282	4	U0	URO	R	c	0	2	4	outer_fore	1.27	7		283	4	U0	URO	R	c	0	2	4	outer_fore	1.22	29
		285	5	U0	URO	R	c	0	4	5	71.2498	-21.1761	50.0737	outer_fore	left	Lfore		283	4	U0	URO	R	c	0	2	4	outer_fore	1.22	6		284	4	U0	URO	R	c	0	2	4	outer_fore	1.3	27
		286	5	U0	URO	R	c	0	4	5	69.7679	-20.7844	48.9835	outer_fore	left	Lfore		284	4	U0	URO	R	c	0	2	4	outer_fore	1.3	6		285	5	U0	URO	R	c	0	4	5	outer_fore	1.38	28
		287	5	U0	URO	R	c	0	4	5	70.7984	-20.9639	49.8346	outer_fore	left	Lfore		285	5	U0	URO	R	c	0	4	5	outer_fore	1.38	4		286	5	U0	URO	R	c	0	4	5	outer_fore	1.34	30
		288	5	U0	URO	R	c	0	4	5	66.3755	-20.0626	46.3129	outer_fore	left	Lfore		286	5	U0	URO	R	c	0	4	5	outer_fore	1.34	5		287	5	U0	URO	R	c	0	4	5	outer_fore	1.37	30
		289	5	U0	URO	R	c	0	4	5	64.6009	-20.6291	43.9718	outer_fore	left	Lfore		287	5	U0	URO	R	c	0	4	5	outer_fore	1.37	6		288	5	U0	URO	R	c	0	4	5	outer_fore	1.38	30
		290	5	U0	URO	R	c	0	4	5	69.1088	-22.3349	46.7739	outer_fore	left	Lfore		288	5	U0	URO	R	c	0	4	5	outer_fore	1.38	3		289	5	U0	URO	R	c	0	4	5	outer_fore	1.41	27
		291	5	U0	URO	R	c	0	4	5	70.4673	-22.7265	47.7408	outer_fore	left	Lfore		289	5	U0	URO	R	c	0	4	5	outer_fore	1.41	3		290	5	U0	URO	R	c	0	4	5	outer_fore	1.48	28
		292	5	U0	URO	R	c	0	4	5	68.5672	-21.4939	47.0732	outer_fore	left	Lfore		290	5	U0	URO	R	c	0	4	5	outer_fore	1.48	5		291	5	U0	URO	R	c	0	4	5	outer_fore	1.38	28
		293	5	U0	URO	R	c	0	4	5	69.9818	-21.1568	48.825	outer_fore	left	Lfore		291	5	U0	URO	R	c	0	4	5	outer_fore	1.38	5		292	5	U0	URO	R	c	0	4	5	outer_fore	1.43	28
		294	5	U0	URO	R	c	0	4	5	67.7327	-20.5296	47.2032	outer_fore	left	Lfore		292	5	U0	URO	R	c	0	4	5	outer_fore	1.43	5		293	5	U0	URO	R	c	0	4	5	outer_fore	1.43	29
		295	5	U0	URO	R	c	0	4	5	71.6907	-22.8325	48.8582	outer_fore	left	Lfore		293	5	U0	URO	R	c	0	4	5	outer_fore	1.43	5		294	5	U0	URO	R	c	0	4	5	outer_fore	1.5	27
		296	5	U0	URO	R	c	0	4	5	67.9141	-19.4175	48.4965	outer_fore	left	Lfore		294	5	U0	URO	R	c	0	4	5	outer_fore	1.5	5		295	5	U0	URO	R	c	0	4	5	outer_fore	1.45	29
		297	7	U0	URO	R	c	0	1	6	60.1339	-22.5268	37.6071	outer_fore	left	Lfore		295	5	U0	URO	R	c	0	4	5	outer_fore	1.45	4		296	5	U0	URO	R	c	0	4	5	outer_fore	1.41	28
		298	7	U0	URO	R	c	0	1	6	60.1688	-21.1977	38.9711	outer_fore	left	Lfore		296	5	U0	URO	R	c	0	4	5	outer_fore	1.41	4		297	7	U0	URO	R	c	0	1	6	outer_fore	1.29	29
		299	7	U0	URO	R	c	0	1	6	60.1818	-22.0665	38.1153	outer_fore	left	Lfore		297	7	U0	URO	R	c	0	1	6	outer_fore	1.29	4		298	7	U0	URO	R	c	0	1	6	outer_fore	1.25	29
		300	7	U0	URO	R	c	0	1	6	60.0482	-22.2958	37.7524	outer_fore	left	Lfore		298	7	U0	URO	R	c	0	1	6	outer_fore	1.25	4		299	7	U0	URO	R	c	0	1	6	outer_fore	1.24	29
		301	7	U0	URO	R	c	0	1	6	57.1728	-20.1866	36.9862	outer_fore	left	Lfore		299	7	U0	URO	R	c	0	1	6	outer_fore	1.24	4		300	7	U0	URO	R	c	0	1	6	outer_fore	1.25	29
		302	7	U0	URO	R	c	0	1	6	61.1938	-22.7674	38.4263	outer_fore	left	Lfore		300	7	U0	URO	R	c	0	1	6	outer_fore	1.25	4		301	7	U0	URO	R	c	0	1	6	outer_fore	1.26	27
		303	7	U0	URO	R	c	0	1	6	59.9081	-22.2894	37.6187	outer_fore	left	Lfore		301	7	U0	URO	R	c	0	1	6	outer_fore	1.26	3		302	7	U0	URO	R	c	0	1	6	outer_fore	1.31	29
		304	7	U0	URO	R	c	0	1	6	57.7812	-22.0695	35.7117	outer_fore	left	Lfore		302	7	U0	URO	R	c	0	1	6	outer_fore	1.31	5		303	7	U0	URO	R	c	0	1	6	outer_fore	1.26	28
		305	8	U0	URO	R	c	0	5	5	70.2465	-19.9787	50.2678	outer_fore	left	Lfore		303	7	U0	URO	R	c	0	1	6	outer_fore	1.26	3		304	7	U0	URO	R	c	0	1	6	outer_fore	1.29	29
		306	8	U0	URO	R	c	0	5	5	67.3449	-19.2594	48.0855	outer_fore	left	Lfore		304	7	U0	URO	R	c	0	1	6	outer_fore	1.29	3		305	8	U0	URO	R	c	0	5	5	outer_fore	1.21	26
		307	8	U0	URO	R	c	0	5	5	62.1911	-19.5054	42.6857	outer_fore	left	Lfore		305	8	U0	URO	R	c	0	5	5	outer_fore	1.21	0		306	8	U0	URO	R	c	0	5	5	outer_fore	1.22	26
		308	8	U0	URO	R	c	0	5	5	66.9479	-20.3976	46.5503	outer_fore	left	Lfore		306	8	U0	URO	R	c	0	5	5	outer_fore	1.22	-1		307	8	U0	URO	R	c	0	5	5	outer_fore	1.17	27
		309	8	U0	URO	R	c	0	5	5	69.718	-20.8065	48.9115	outer_fore	left	Lfore		307	8	U0	URO	R	c	0	5	5	outer_fore	1.17	0		308	8	U0	URO	R	c	0	5	5	outer_fore	1.2	28
		310	8	U0	URO	R	c	0	5	5	62.8803	-20.2293	42.6509	outer_fore	left	Lfore		308	8	U0	URO	R	c	0	5	5	outer_fore	1.2	1		309	8	U0	URO	R	c	0	5	5	outer_fore	1.22	28
		311	8	U0	URO	R	c	0	5	5	66.843	-18.5632	48.2798	outer_fore	left	Lfore		309	8	U0	URO	R	c	0	5	5	outer_fore	1.22	1		310	8	U0	URO	R	c	0	5	5	outer_fore	1.24	26
		312	8	U0	URO	R	c	0	5	5	68.4809	-20.7422	47.7387	outer_fore	left	Lfore		310	8	U0	URO	R	c	0	5	5	outer_fore	1.24	-1		311	8	U0	URO	R	c	0	5	5	outer_fore	1.23	28
		313	8	U0	URO	R	c	0	5	5	68.1331	-20.4137	47.7194	outer_fore	left	Lfore		311	8	U0	URO	R	c	0	5	5	outer_fore	1.23	2		312	8	U0	URO	R	c	0	5	5	outer_fore	1.22	27
		314	8	U0	URO	R	c	0	5	5	63.5559	-20.3867	43.1691	outer_fore	left	Lfore		312	8	U0	URO	R	c	0	5	5	outer_fore	1.22	1		313	8	U0	URO	R	c	0	5	5	outer_fore	1.21	27
		315	8	U0	URO	R	c	0	5	5	66.8701	-19.9896	46.8805	outer_fore	left	Lfore		313	8	U0	URO	R	c	0	5	5	outer_fore	1.21	1		314	8	U0	URO	R	c	0	5	5	outer_fore	1.21	28
		316	8	U0	URO	R	c	0	5	5	72.7763	-24.1918	48.5845	outer_fore	left	Lfore		314	8	U0	URO	R	c	0	5	5	outer_fore	1.21	1		315	8	U0	URO	R	c	0	5	5	outer_fore	1.23	31
		317	8	U0	URO	R	c	0	5	5	67.9029	-20.217	47.6859	outer_fore	left	Lfore		315	8	U0	URO	R	c	0	5	5	outer_fore	1.23	3		316	8	U0	URO	R	c	0	5	5	outer_fore	1.25	30
		318	8	U0	URO	R	c	0	5	5	66.4506	-18.3516	48.099	outer_fore	left	Lfore		316	8	U0	URO	R	c	0	5	5	outer_fore	1.25	6		317	8	U0	URO	R	c	0	5	5	outer_fore	1.21	30
		319	8	U0	URO	R	c	0	5	5	68.4997	-19.4644	49.0353	outer_fore	left	Lfore		317	8	U0	URO	R	c	0	5	5	outer_fore	1.21	3		318	8	U0	URO	R	c	0	5	5	outer_fore	1.25	29
		320	9	U0	URO	R	c	0	3	6	56.3377	-21.6179	34.7198	outer_fore	left	Lfore		318	8	U0	URO	R	c	0	5	5	outer_fore	1.25	3		319	8	U0	URO	R	c	0	5	5	outer_fore	1.29	27
		321	9	U0	URO	R	c	0	3	6	57.4691	-20.5288	36.9404	outer_fore	left	Lfore		319	8	U0	URO	R	c	0	5	5	outer_fore	1.29	2		320	9	U0	URO	R	c	0	3	6	outer_fore	1.22	31
		322	9	U0	URO	R	c	0	3	6	52.5906	-18.653	33.9376	outer_fore	left	Lfore		320	9	U0	URO	R	c	0	3	6	outer_fore	1.22	5		321	9	U0	URO	R	c	0	3	6	outer_fore	1.21	34
		323	9	U0	URO	R	c	0	3	6	57.1864	-21.5512	35.6352	outer_fore	left	Lfore		321	9	U0	URO	R	c	0	3	6	outer_fore	1.21	7		322	9	U0	URO	R	c	0	3	6	outer_fore	1.22	28
		324	9	U0	URO	R	c	0	3	6	55.3874	-20.0344	35.353	outer_fore	left	Lfore		322	9	U0	URO	R	c	0	3	6	outer_fore	1.22	4		323	9	U0	URO	R	c	0	3	6	outer_fore	1.19	29
		325	9	U0	URO	R	c	0	3	6	55.2984	-18.8416	36.4568	outer_fore	left	Lfore		323	9	U0	URO	R	c	0	3	6	outer_fore	1.19	1		324	9	U0	URO	R	c	0	3	6	outer_fore	1.19	27
		326	9	U0	URO	R	c	0	3	6	55.0727	-18.0287	37.0441	outer_fore	left	Lfore		324	9	U0	URO	R	c	0	3	6	outer_fore	1.19	2		325	9	U0	URO	R	c	0	3	6	outer_fore	1.22	28
		327	9	U0	URO	R	c	0	3	6	56.7582	-19.7419	37.0163	outer_fore	left	Lfore		325	9	U0	URO	R	c	0	3	6	outer_fore	1.22	1		326	9	U0	URO	R	c	0	3	6	outer_fore	1.21	30
		328	9	U0	URO	R	c	0	3	6	58.7986	-20.7349	38.0637	outer_fore	left	Lfore		326	9	U0	URO	R	c	0	3	6	outer_fore	1.21	3		327	9	U0	URO	R	c	0	3	6	outer_fore	1.22	27
[truncated: 3,904 more rows]

## Sheet: mod1_code
	Models 1
	s1 parameters														withers parameters
[truncated: 39 more rows]

## Sheet: mod2_code
	ods html;														/*random struktur för pro ochret*/
[truncated: 16 more rows]

[truncated: 3 more sheets: SD_code, ModSD_res, SD_data]
